# Supplementary material for: Single cell analysis of gene expression in the substantia nigra pars compacta of a pesticide-induced mouse model of Parkinson’s disease
Source: bioRxiv preprint, doi:10.1101/2022.02.18.481079, version 1 (2022-02-19)
Supplement: Supplementary Table S4 [file 481079_file06.xlsx]

## Sheet: Supplementary Table S4 Legend
Supplementary Table S4. Average expression differences between MNPQ (treated) and control samples. Expression is on ln((average expression) + 1) scale.

## Sheet: Top 3 genes
Gene ID	Control average expression	Treated average expression	Difference		Gene ID	Control average expression	Treated average expression	Difference
Top 3 highest expression difference					Bottom 3 lowest expression difference
Astrocyte
Igfbp2	1.22308	2.25304	1.02996		Sparc	3.02105	1.91188	-1.10917
Id4	0.858217	1.8674	1.00918		Itih3	2.90836	1.44222	-1.46614
Ppp1r3g	0.2926	1.13566	0.843065		Gm42418	3.80084	1.98514	-1.8157
Endothelial cells
Hbb-bt	0.597162	1.90901	1.31185		Nedd4	1.36541	0.667255	-0.698159
Hbb-bs	3.16701	3.8492	0.682188		Cnot4	1.03113	0.30673	-0.724399
Wbp2	0.346053	0.996698	0.650645		Gm42418	3.55475	2.22063	-1.33413
Ependymal cells
Acta2	1.27566	2.70047	1.42481		Dthd1	1.47099	0	-1.47099
Id4	1.26045	2.53994	1.27949		Clec3b	1.79978	0.296629	-1.50315
Atp1a2	1.74902	2.95393	1.20491		Gm42418	4.21395	1.34427	-2.86967
Microglia
Cd74	0.318991	2.22399	1.905		Agt	0.748577	0.0833316	-0.665246
Vtn	0.06027	1.75296	1.69269		Gm42418	2.26699	1.3972	-0.869788
Rgs5	0.113692	1.39546	1.28177		Jun	2.2584	1.33136	-0.927042
Mural cells
Ptgds	0.306192	3.24178	2.93559		Gucy1a1	1.87594	1.14043	-0.735506
Apod	0.462787	2.8464	2.38361		Diaph2	0.958112	0.199521	-0.758591
Igfbp2	0.184273	1.94707	1.76279		Gm42418	3.04742	1.40507	-1.64235
Neuron
Sort1	0.355489	1.35633	1.00084		Hexb	1.33215	0.264856	-1.06729
Scn1b	1.09955	2.09331	0.993766		Map7d2	1.84696	0.76219	-1.08477
Pianp	0.464906	1.45329	0.988385		Npy	2.51771	1.18205	-1.33565
Oligodendrocyte
Glul	2.73339	3.55569	0.822297		Nnat	0.821966	0.121801	-0.700165
Bsg	1.14671	1.86645	0.719732		Sparc	1.33643	0.426449	-0.909983
Gstp1	1.6262	2.33305	0.706846		Gm42418	3.28779	1.43846	-1.84933

## Sheet: Astrocytes
gene_id	Control	Treated	diff	gene
Igfbp2	1.22308	2.25304	1.02996	Igfbp2
Id4	0.858217	1.8674	1.00918	Id4
Ppp1r3g	0.2926	1.13566	0.843065	Ppp1r3g
Dbp	1.14798	1.90868	0.760699	Dbp
Camk2n1	0.706132	1.45465	0.748517	Camk2n1
Tagln3	1.25392	1.95582	0.701899	Tagln3
Cox7b	1.17317	1.87502	0.70185	Cox7b
Gadd45gip1	0.479624	1.17822	0.698595	Gadd45gip1
Kcnk1	1.12337	1.80968	0.686308	Kcnk1
Btbd17	1.5122	2.17999	0.667796	Btbd17
Ndufb6	0.907594	1.57486	0.667269	Ndufb6
Prelid3b	0.324047	0.970403	0.646357	Prelid3b
Fabp5	2.0554	2.69137	0.635973	Fabp5
Cox8a	2.47682	3.11093	0.634111	Cox8a
Cntfr	0.811372	1.44319	0.631814	Cntfr
Dbx2	1.217	1.84732	0.630317	Dbx2
Mt2	2.93015	3.55541	0.625263	Mt2
Atp1b1	0.563981	1.18393	0.619945	Atp1b1
Fdps	0.887439	1.50602	0.61858	Fdps
Rbp1	0.660488	1.27592	0.615434	Rbp1
Immp1l	0.357654	0.97146	0.613806	Immp1l
Cox5a	1.6414	2.252	0.610594	Cox5a
2010107E04Rik	1.73275	2.34281	0.610064	2010107E04Rik
Rpl31	1.61961	2.22464	0.605025	Rpl31
Cox6a1	1.85135	2.45534	0.603994	Cox6a1
Mif	1.34841	1.94779	0.599375	Mif
Csrp1	1.79677	2.3915	0.594737	Csrp1
Mir124-2hg	0.432781	1.02486	0.592079	Mir124-2hg
Chchd10	2.15574	2.74176	0.586023	Chchd10
Mt1	4.22415	4.80793	0.583778	Mt1
Uqcr11	1.81616	2.39401	0.577844	Uqcr11
Cystm1	1.19307	1.76355	0.570478	Cystm1
Tspan7	2.77163	3.33153	0.559903	Tspan7
Prdx6	2.90607	3.46444	0.558367	Prdx6
Pmp22	0.608394	1.16573	0.557336	Pmp22
Slc25a18	1.64862	2.20439	0.555772	Slc25a18
Ndufa8	1.01551	1.57122	0.555715	Ndufa8
Usmg5	1.67721	2.23273	0.555525	Usmg5
Timm8b	0.875534	1.42907	0.553531	Timm8b
Uqcrc1	1.28199	1.81788	0.535896	Uqcrc1
Atp5g1	1.23018	1.76315	0.532973	Atp5g1
Orai1	0.31243	0.840877	0.528448	Orai1
Rpl27	0.150528	0.675502	0.524974	Rpl27
Cdc42se1	0.213629	0.737527	0.523898	Cdc42se1
Tbca	0.631483	1.15368	0.522197	Tbca
Cxcl14	2.28395	2.80505	0.52111	Cxcl14
Atp6v1g1	1.10437	1.62388	0.519511	Atp6v1g1
Fam181b	1.12327	1.64245	0.51918	Fam181b
Atp5e	1.55338	2.07121	0.517828	Atp5e
Cstb	0.52152	1.03879	0.517267	Cstb
Tma7	0.756559	1.27323	0.516669	Tma7
Tubb2a	1.73192	2.24851	0.516587	Tubb2a
Mrpl30	0.636245	1.15208	0.51584	Mrpl30
Cbr3	0.414374	0.928697	0.514322	Cbr3
Capns1	0.816734	1.33096	0.514224	Capns1
Atp5g2	1.30128	1.81455	0.513274	Atp5g2
Ndufs6	1.01017	1.52262	0.512448	Ndufs6
Uqcrq	1.45816	1.96707	0.50891	Uqcrq
Mgll	1.51996	2.02789	0.507933	Mgll
Fam107a	1.4022	1.90986	0.507653	Fam107a
Dda1	0.342907	0.848988	0.506081	Dda1
Fam96b	0.304418	0.809906	0.505489	Fam96b
Cyb5a	1.26997	1.77523	0.505254	Cyb5a
Naaa	0.739477	1.23813	0.498649	Naaa
Oaf	0.675302	1.17189	0.49659	Oaf
Guk1	0.483001	0.977565	0.494564	Guk1
Lamtor5	0.59851	1.09084	0.492332	Lamtor5
Ndufa4	1.93375	2.42598	0.492229	Ndufa4
Mpdu1	0.667224	1.15912	0.491896	Mpdu1
Hapln1	0.201461	0.693316	0.491854	Hapln1
Dexi	0.137802	0.629024	0.491222	Dexi
Mrpl15	0.377343	0.865809	0.488467	Mrpl15
Rpl17	1.56799	2.05181	0.483827	Rpl17
Brk1	0.756944	1.24041	0.483463	Brk1
Rpl28	1.53202	2.0148	0.482782	Rpl28
Atp5k	1.61483	2.0954	0.480567	Atp5k
Ptn	3.13992	3.61837	0.478447	Ptn
Ndufa6	1.16839	1.64592	0.477526	Ndufa6
Selenow	1.85431	2.32972	0.47541	Selenow
Pfn2	1.38203	1.8564	0.474366	Pfn2
Uqcrh	1.71099	2.1848	0.473816	Uqcrh
Actb	2.34859	2.82039	0.471807	Actb
Rex1bd	0.575234	1.04501	0.469772	Rex1bd
Hint1	1.34972	1.81947	0.46975	Hint1
Aes	0.686879	1.15656	0.469678	Aes
Scrg1	1.36791	1.8371	0.469195	Scrg1
Pgam1	1.3733	1.84128	0.467977	Pgam1
Nptn	0.765179	1.23093	0.465749	Nptn
Atp5f1	1.506	1.9717	0.465699	Atp5f1
Cycs	1.18103	1.64579	0.464757	Cycs
Uqcrb	1.54237	2.00517	0.462795	Uqcrb
Abcb9	0.553741	1.01644	0.462696	Abcb9
Cisd1	1.08403	1.54566	0.461638	Cisd1
Ndufv2	1.23284	1.69442	0.461581	Ndufv2
Rpl12	0.7602	1.22162	0.46142	Rpl12
Gltp	0.201675	0.662709	0.461034	Gltp
Rps28	1.62665	2.08717	0.460523	Rps28
Mt3	3.7096	4.16978	0.460181	Mt3
Ndufa2	1.5036	1.96163	0.458025	Ndufa2
1110065P20Rik	0.459877	0.916894	0.457017	1110065P20Rik
Adrm1	0.256352	0.713185	0.456833	Adrm1
Cox7c	2.29441	2.75007	0.455667	Cox7c
Cox5b	1.72938	2.18405	0.454662	Cox5b
Usf2	0.419627	0.872779	0.453152	Usf2
Nfasc	0.415199	0.867237	0.452039	Nfasc
Ftl1	2.01887	2.47012	0.451255	Ftl1
Eif1	2.47295	2.92305	0.450103	Eif1
Laptm4b	0.514837	0.964064	0.449227	Laptm4b
Id2	2.3809	2.82856	0.447655	Id2
Tst	1.76275	2.20915	0.446404	Tst
Pantr1	1.64703	2.09291	0.445875	Pantr1
Taf11	0.103899	0.546939	0.44304	Taf11
Prkaca	0.136657	0.579628	0.442971	Prkaca
Cox7a2l	0.649417	1.0913	0.441883	Cox7a2l
Rpl18a	1.87675	2.31847	0.441719	Rpl18a
Rps4x	1.49963	1.94111	0.441483	Rps4x
Srd5a3	0.0504874	0.491497	0.44101	Srd5a3
Rpl36a	1.0238	1.46468	0.440881	Rpl36a
Gapdh	2.49427	2.93406	0.439798	Gapdh
Enho	1.62922	2.06859	0.43937	Enho
Rpl7a	0.985828	1.42469	0.438859	Rpl7a
Fam20a	0.355158	0.793804	0.438646	Fam20a
Cox7a2	1.71202	2.15054	0.438524	Cox7a2
Aplp1	1.60831	2.04471	0.436402	Aplp1
Apopt1	0.200377	0.635556	0.435178	Apopt1
Taldo1	0.855405	1.29002	0.434619	Taldo1
Slc9a3r1	1.51356	1.94795	0.434392	Slc9a3r1
Tomm5	0.495866	0.930218	0.434352	Tomm5
Tpgs1	0.485025	0.919347	0.434322	Tpgs1
Rps14	2.11279	2.54697	0.434181	Rps14
Atp5a1	1.6641	2.09709	0.432991	Atp5a1
Eif1b	1.04116	1.47334	0.432186	Eif1b
Snx3	1.11081	1.54086	0.430051	Snx3
Tomm22	0.578593	1.00844	0.429849	Tomm22
Cend1	0.238381	0.667789	0.429408	Cend1
Atp5d	1.53472	1.96331	0.42859	Atp5d
Ndufa9	0.787905	1.21447	0.426563	Ndufa9
Pfdn6	0.405092	0.830875	0.425783	Pfdn6
Sox2	0.783879	1.20858	0.4247	Sox2
Grpel1	0.507831	0.932175	0.424344	Grpel1
Alkbh7	0.382396	0.806273	0.423877	Alkbh7
Btf3	1.22055	1.64431	0.423763	Btf3
Hey1	0.564935	0.987519	0.422583	Hey1
Ube2e1	0.650201	1.07265	0.422444	Ube2e1
Atp5c1	1.53614	1.95812	0.421973	Atp5c1
Ndufs5	1.97513	2.39574	0.420612	Ndufs5
Gm266	0.412793	0.832274	0.419481	Gm266
Rala	0.321083	0.739945	0.418861	Rala
Sdhb	1.34339	1.76159	0.418207	Sdhb
Ldha	1.02942	1.44734	0.417917	Ldha
Vapa	1.02983	1.44685	0.417023	Vapa
Fez1	1.33286	1.74957	0.416717	Fez1
Eri3	0.437005	0.852654	0.415649	Eri3
Ezr	0.766304	1.18185	0.415541	Ezr
U2af1	0.607563	1.02299	0.415427	U2af1
Pde6d	0.472788	0.887091	0.414303	Pde6d
Atp5h	1.92884	2.34138	0.412535	Atp5h
Mdh1	1.60867	2.02074	0.412067	Mdh1
Cfl1	1.93122	2.34285	0.411625	Cfl1
Lmo4	0.6026	1.01306	0.410463	Lmo4
Tomm20	0.767032	1.17748	0.410446	Tomm20
Rgcc	1.31377	1.72415	0.410378	Rgcc
Rpl29	1.13564	1.54585	0.410211	Rpl29
Rpl37	2.02638	2.4365	0.410121	Rpl37
Mrps18c	0.402109	0.812176	0.410067	Mrps18c
Fam171b	0.914426	1.32429	0.409868	Fam171b
Minos1	1.22203	1.63019	0.408159	Minos1
Ap2s1	0.639334	1.04536	0.406027	Ap2s1
Ndufs3	1.0754	1.48094	0.405539	Ndufs3
Naxe	0.953719	1.35744	0.403717	Naxe
Ndufb9	1.76589	2.16898	0.403084	Ndufb9
Rps20	1.17575	1.57874	0.402986	Rps20
Nfkbib	0.214015	0.615765	0.40175	Nfkbib
Ddt	1.09341	1.49456	0.401148	Ddt
Dkk3	0.567891	0.968084	0.400193	Dkk3
Pcbp1	0.372251	0.772405	0.400154	Pcbp1
Metrn	1.03995	1.44008	0.400129	Metrn
Rpl39	1.48905	1.88863	0.399586	Rpl39
Ssna1	0.261568	0.660913	0.399345	Ssna1
Pak1ip1	0.11461	0.513612	0.399002	Pak1ip1
Cd302	0.889561	1.28547	0.395909	Cd302
Snapc5	0.365038	0.760725	0.395686	Snapc5
Eno1	2.25136	2.64696	0.395596	Eno1
Adk	1.40524	1.80055	0.395313	Adk
Mvd	0.447188	0.841952	0.394764	Mvd
Rpusd3	0.0783989	0.472326	0.393928	Rpusd3
Mical3	0.081426	0.474632	0.393206	Mical3
Cst3	5.4119	5.80326	0.391362	Cst3
Rpl10-ps3	1.0213	1.41192	0.39062	Rpl10-ps3
Polr2j	0.528001	0.9184	0.390398	Polr2j
Rnf7	0.889517	1.27959	0.390074	Rnf7
Atox1	0.782788	1.17143	0.388641	Atox1
Sys1	0.538052	0.926291	0.388239	Sys1
Mbp	2.65491	3.04297	0.388059	Mbp
Rps7	1.47402	1.86129	0.387275	Rps7
Prr13	0.460628	0.847425	0.386797	Prr13
Gipc1	0.504347	0.889093	0.384746	Gipc1
Stx12	0.549811	0.934475	0.384663	Stx12
Lcat	1.05288	1.43645	0.383566	Lcat
Sdhc	0.838557	1.22192	0.383363	Sdhc
Elovl5	0.984483	1.36768	0.383197	Elovl5
Rpl23	1.65453	2.03769	0.383163	Rpl23
Il18	1.29322	1.67559	0.382375	Il18
Elp5	0.219329	0.601185	0.381856	Elp5
Ak1	0.367273	0.748524	0.381251	Ak1
Ndp	0.302138	0.683163	0.381025	Ndp
Rps26	1.25868	1.63936	0.380676	Rps26
Rpl7	1.57921	1.95926	0.380052	Rpl7
Fuom	0.457911	0.837805	0.379894	Fuom
Rtcb	0.355937	0.734957	0.37902	Rtcb
Elob	1.34215	1.72076	0.378613	Elob
Cdk5rap3	0.404214	0.782738	0.378524	Cdk5rap3
Ccnh	0.425473	0.803808	0.378335	Ccnh
Rpl27-ps3	0.593464	0.971003	0.377539	Rpl27-ps3
Smox	0.849121	1.22617	0.37705	Smox
Timm13	0.961226	1.33777	0.376547	Timm13
Akt2	0.432323	0.808377	0.376054	Akt2
Phpt1	1.08515	1.46034	0.375194	Phpt1
Gstm5	2.8936	3.26825	0.374651	Gstm5
Psma5	0.806722	1.1811	0.374382	Psma5
Hikeshi	0.321727	0.695941	0.374214	Hikeshi
Aldoa	2.45944	2.83353	0.374092	Aldoa
Rap1b	0.365421	0.738851	0.37343	Rap1b
Akr7a5	0.456175	0.828681	0.372505	Akr7a5
Bcas1	0.549897	0.922171	0.372274	Bcas1
Mfge8	2.8856	3.25775	0.372156	Mfge8
Tmed7	0.574736	0.946491	0.371755	Tmed7
Lppos	0.474719	0.845957	0.371238	Lppos
Prdx1	2.50458	2.87564	0.371064	Prdx1
Akirin2	0.0729085	0.443211	0.370302	Akirin2
Psat1	0.776725	1.14633	0.3696	Psat1
Tmem160	0.704242	1.07341	0.369169	Tmem160
Rps17	1.55037	1.91914	0.368765	Rps17
Slc25a33	0.714338	1.08276	0.368422	Slc25a33
Clta	0.945989	1.31418	0.368193	Clta
Mrpl46	0.30302	0.671002	0.367981	Mrpl46
Ddit3	0.265328	0.63316	0.367832	Ddit3
Rpl21	1.86838	2.23615	0.367771	Rpl21
Nupr1	0.59813	0.965813	0.367683	Nupr1
Bpnt1	0.393844	0.761083	0.367239	Bpnt1
Chmp2a	0.984546	1.35108	0.36653	Chmp2a
Cox4i1	2.54814	2.91444	0.366306	Cox4i1
Ccnd3	0.375216	0.74148	0.366264	Ccnd3
Znhit1	0.408255	0.774059	0.365805	Znhit1
Ccdc190	0.551546	0.917222	0.365675	Ccdc190
Mdh2	1.31784	1.68317	0.365325	Mdh2
Tsc22d4	2.04612	2.41125	0.365136	Tsc22d4
Eef1akmt1	0.267911	0.631803	0.363892	Eef1akmt1
Ppia	2.8342	3.19765	0.363447	Ppia
Hebp1	0.27028	0.63304	0.362761	Hebp1
Pmm1	1.93255	2.29516	0.36261	Pmm1
Fdft1	0.972389	1.33496	0.362572	Fdft1
Psmc1	0.497861	0.858983	0.361122	Psmc1
Gde1	0.98365	1.34452	0.360872	Gde1
Bet1l	0.479475	0.840081	0.360607	Bet1l
Rbx1	1.26608	1.62665	0.360568	Rbx1
Id3	1.75627	2.11652	0.360246	Id3
Rab4a	0.210701	0.569581	0.35888	Rab4a
Cbx3	0.757211	1.11573	0.358516	Cbx3
Ckb	4.0637	4.4222	0.358505	Ckb
Mrpl34	0.414847	0.772909	0.358062	Mrpl34
Rps8	1.84119	2.19924	0.358059	Rps8
Api5	0.272544	0.630379	0.357835	Api5
Tpi1	1.61781	1.97565	0.357833	Tpi1
Grcc10	0.698758	1.05643	0.357677	Grcc10
Htra1	2.54044	2.89769	0.357247	Htra1
Rpl9	0.581674	0.937795	0.356121	Rpl9
Gm5617	0.103829	0.459203	0.355375	Gm5617
Uqcrfs1	1.21578	1.57071	0.354934	Uqcrfs1
Suclg1	1.13865	1.49348	0.354832	Suclg1
Pmvk	0.688436	1.04313	0.354691	Pmvk
Abhd8	0.519765	0.873409	0.353644	Abhd8
Csad	0.163787	0.517418	0.353631	Csad
Bmyc	1.1582	1.51165	0.353449	Bmyc
Hsd11b1	1.05429	1.40754	0.353246	Hsd11b1
Rps25	1.48447	1.83757	0.353102	Rps25
Unc119	0.237085	0.59005	0.352965	Unc119
Sh3bgrl3	0.446861	0.799664	0.352804	Sh3bgrl3
Ndufb5	1.15253	1.50502	0.35249	Ndufb5
Cirbp	0.959593	1.31166	0.35207	Cirbp
Nudt16l1	0.246458	0.598067	0.351609	Nudt16l1
Rps3a1	1.60174	1.95328	0.351539	Rps3a1
Mcrip2	0.344233	0.695483	0.351249	Mcrip2
Psmc2	0.524231	0.875446	0.351215	Psmc2
Mrps12	0.477875	0.829028	0.351153	Mrps12
Fth1	3.61141	3.96238	0.35097	Fth1
Gm11627	0.420072	0.770734	0.350662	Gm11627
Mobp	1.16634	1.51649	0.350147	Mobp
Cck	0.0529336	0.402848	0.349914	Cck
Klf15	0.559667	0.909488	0.349821	Klf15
Mrps17	0.587114	0.936914	0.3498	Mrps17
Syngr1	0.245674	0.594716	0.349042	Syngr1
Mrps24	0.722703	1.07106	0.348353	Mrps24
Smarcb1	0.482706	0.831018	0.348312	Smarcb1
Ube2f	0.225897	0.573961	0.348065	Ube2f
Ndufb11	1.53687	1.8839	0.347026	Ndufb11
Snrpb	0.873104	1.22013	0.347025	Snrpb
Smim4	0.370761	0.717687	0.346926	Smim4
Rps15	1.71572	2.06199	0.346275	Rps15
Lin52	0.0575573	0.402917	0.34536	Lin52
Rpl36al	0.619357	0.963091	0.343734	Rpl36al
Mrpl51	0.73262	1.0762	0.343578	Mrpl51
Rpl26	1.87625	2.21966	0.343411	Rpl26
Svbp	0.528131	0.871195	0.343064	Svbp
Celf2	0.565991	0.909004	0.343013	Celf2
Aldh1a1	0.510832	0.853606	0.342774	Aldh1a1
Bola3	0.568658	0.911393	0.342734	Bola3
Txn1	0.898814	1.24144	0.342624	Txn1
Snta1	0.605677	0.948278	0.342601	Snta1
Atp6v1d	0.636121	0.978682	0.342561	Atp6v1d
Rplp0	1.5585	1.90094	0.342434	Rplp0
Rpl19	1.88968	2.23176	0.342081	Rpl19
Slc25a5	2.27283	2.61459	0.341756	Slc25a5
Baalc	1.41254	1.75422	0.341678	Baalc
Erh	0.507001	0.84839	0.341388	Erh
Arhgdia	0.693694	1.03499	0.341298	Arhgdia
Oard1	0.297856	0.639141	0.341285	Oard1
Etv5	0.241061	0.58203	0.340969	Etv5
Mrpl55	0.647079	0.98741	0.34033	Mrpl55
Dnajb9	0.936002	1.27613	0.340124	Dnajb9
Mrps34	0.620765	0.960491	0.339726	Mrps34
Prpf31	0.209793	0.548963	0.33917	Prpf31
Anapc16	0.719168	1.05799	0.338823	Anapc16
Dscr3	0.11564	0.453733	0.338093	Dscr3
Pomp	0.964537	1.30203	0.337492	Pomp
Smim19	0.343901	0.680424	0.336523	Smim19
Rps3	1.67293	2.0094	0.336469	Rps3
Uxs1	0.146062	0.482399	0.336337	Uxs1
Ndufc2	1.89195	2.2281	0.336147	Ndufc2
Rpl5	1.04423	1.38031	0.336075	Rpl5
Nhp2	0.384346	0.719331	0.334985	Nhp2
Lhx2	0.697055	1.03149	0.334434	Lhx2
S100a16	2.00949	2.34377	0.334279	S100a16
D8Ertd738e	0.928895	1.26264	0.333746	D8Ertd738e
Wnt7a	0.247523	0.581027	0.333505	Wnt7a
Pim3	0.164113	0.497437	0.333324	Pim3
Slco1c1	0.806243	1.13942	0.333173	Slco1c1
Smap1	0.198325	0.531455	0.33313	Smap1
Fmc1	1.35131	1.68442	0.33311	Fmc1
Borcs7	0.241097	0.573639	0.332543	Borcs7
Tmem109	0.351464	0.68355	0.332086	Tmem109
Rpl11	1.68864	2.01996	0.331316	Rpl11
Eif5a	1.106	1.43658	0.330573	Eif5a
Sem1	1.13937	1.46985	0.330475	Sem1
Ndufa11	1.29466	1.62511	0.330446	Ndufa11
Dynll1	1.64978	1.97979	0.330009	Dynll1
Scamp3	0.366367	0.695782	0.329415	Scamp3
Tuba4a	1.03333	1.3626	0.329274	Tuba4a
Mcrip1	0.63065	0.959668	0.329018	Mcrip1
Rab9	0.920427	1.24904	0.328611	Rab9
Snrpf	0.489597	0.81811	0.328513	Snrpf
Manf	0.648037	0.976495	0.328458	Manf
Snrpd1	0.687267	1.01545	0.328179	Snrpd1
Sumo2	1.53552	1.86342	0.327899	Sumo2
Thoc7	0.518683	0.846379	0.327696	Thoc7
Ndufa5	1.36943	1.69683	0.327398	Ndufa5
Ndufs7	1.3906	1.71708	0.326478	Ndufs7
Nubp2	0.214969	0.541328	0.326359	Nubp2
Oaz2	0.641388	0.967739	0.326351	Oaz2
Ppp5c	0.413587	0.739822	0.326235	Ppp5c
Btg1	0.642384	0.967244	0.32486	Btg1
Sod3	0.193651	0.518501	0.32485	Sod3
Fam69b	0.294906	0.61954	0.324633	Fam69b
Slc31a1	0.174646	0.499182	0.324535	Slc31a1
Ndufb4	1.41041	1.73492	0.324507	Ndufb4
Eif3j1	0.475623	0.799894	0.324271	Eif3j1
Snx18	0.181511	0.505544	0.324033	Snx18
Trappc6b	0.408342	0.731777	0.323434	Trappc6b
Hmox2	0.277832	0.600973	0.323141	Hmox2
Nsdhl	0.430284	0.753142	0.322858	Nsdhl
Rpl9-ps6	1.02445	1.34672	0.322272	Rpl9-ps6
Eif3k	0.89046	1.2127	0.322237	Eif3k
Rpp25l	0.305727	0.627767	0.32204	Rpp25l
Fkbp4	0.683243	1.00522	0.321982	Fkbp4
Ndufa13	2.00199	2.32393	0.321939	Ndufa13
Cmtm5	1.4004	1.72194	0.321541	Cmtm5
Slc48a1	0.927116	1.24838	0.321268	Slc48a1
Car8	0.160441	0.481143	0.320702	Car8
Hist1h4i	0.00369169	0.323985	0.320293	Hist1h4i
Mien1	0.728947	1.04922	0.320277	Mien1
Map1lc3a	1.00078	1.32076	0.319979	Map1lc3a
Mrpl42	0.869741	1.18968	0.319935	Mrpl42
Mapre2	0.49191	0.811798	0.319888	Mapre2
Pebp1	1.48778	1.80701	0.319232	Pebp1
Rplp1	2.01823	2.33741	0.319175	Rplp1
Gm2115	0.079256	0.39821	0.318954	Gm2115
Gdi1	0.546954	0.865582	0.318627	Gdi1
Rnf11	0.333324	0.65184	0.318517	Rnf11
Tex261	0.517042	0.835449	0.318406	Tex261
Smndc1	0.111867	0.429669	0.317802	Smndc1
Uap1l1	0.13559	0.452756	0.317167	Uap1l1
Skp1a	1.01547	1.33223	0.316759	Skp1a
Rnps1	0.235993	0.552489	0.316496	Rnps1
H3f3a	1.57664	1.89246	0.315818	H3f3a
Fam216a	0.24453	0.560316	0.315786	Fam216a
1110008P14Rik	0.23218	0.547488	0.315308	1110008P14Rik
Atp5l	2.10938	2.42448	0.315098	Atp5l
Gm11808	0.87072	1.1855	0.314778	Gm11808
Cd47	1.02982	1.34455	0.314739	Cd47
Cideb	0.271688	0.585622	0.313933	Cideb
Cdpf1	0.0480489	0.361871	0.313822	Cdpf1
Sssca1	0.186779	0.500023	0.313244	Sssca1
Ndufs2	1.05153	1.36421	0.31268	Ndufs2
Rps27l	0.790943	1.10345	0.312504	Rps27l
Zfp637	0.212188	0.524645	0.312456	Zfp637
Atp6v0e2	0.770776	1.08307	0.312293	Atp6v0e2
Msrb1	0.336131	0.648406	0.312275	Msrb1
Acsbg1	2.25836	2.57056	0.312195	Acsbg1
Ndrg4	0.287733	0.599217	0.311484	Ndrg4
Thy1	0.326844	0.638199	0.311354	Thy1
Sod2	1.20475	1.51597	0.311227	Sod2
Hist1h4h	0.0717877	0.382743	0.310955	Hist1h4h
Serf2	1.84802	2.15837	0.310354	Serf2
Dynlrb1	1.1711	1.48145	0.310352	Dynlrb1
Sec13	0.464692	0.774891	0.310199	Sec13
Dohh	0.239625	0.549794	0.310169	Dohh
Krt10	0.243387	0.553501	0.310115	Krt10
Sap18b	0.174283	0.484302	0.310019	Sap18b
Ufd1	0.246316	0.556312	0.309996	Ufd1
R3hdm4	0.195689	0.505315	0.309626	R3hdm4
Cox14	1.04405	1.35363	0.309583	Cox14
Mrpl11	0.565684	0.873865	0.308181	Mrpl11
Grina	1.4684	1.77652	0.308125	Grina
Cndp2	0.186693	0.494365	0.307672	Cndp2
Dtymk	0.355225	0.66269	0.307465	Dtymk
Aup1	0.353875	0.661254	0.307379	Aup1
Atp6v1e1	0.878366	1.18573	0.307365	Atp6v1e1
Phb	0.445403	0.752537	0.307134	Phb
Mrps7	0.571806	0.878891	0.307085	Mrps7
Thrsp	0.994648	1.30156	0.306916	Thrsp
Selenof	1.76578	2.07189	0.30611	Selenof
Gstm1	3.13577	3.44176	0.305994	Gstm1
Tspan4	0.183677	0.489611	0.305934	Tspan4
Timm22	0.135673	0.441386	0.305714	Timm22
Lsm8	0.234805	0.539883	0.305078	Lsm8
Psmb4	0.692633	0.99702	0.304388	Psmb4
Msmo1	2.04289	2.34678	0.303884	Msmo1
Mrpl16	0.160072	0.463936	0.303864	Mrpl16
Arhgef19	0.253936	0.557547	0.303611	Arhgef19
Snrpd2	0.879287	1.18268	0.303397	Snrpd2
Tmem256	1.39291	1.69625	0.303336	Tmem256
Rtl8a	0.673201	0.976096	0.302895	Rtl8a
Pdgfc	0.133764	0.436451	0.302687	Pdgfc
Ndufs8	0.863501	1.16596	0.302458	Ndufs8
Tpt1	1.51774	1.82	0.302253	Tpt1
Angptl4	0.320545	0.622287	0.301743	Angptl4
Mafg	0.208758	0.510406	0.301649	Mafg
Rps27a	1.9029	2.20426	0.301366	Rps27a
Pcbp2	0.747724	1.04872	0.300994	Pcbp2
Zfp428	0.492373	0.792607	0.300235	Zfp428
Rpl22	0.815065	1.11483	0.299764	Rpl22
Acot13	0.914073	1.21361	0.299537	Acot13
Cspg5	2.45214	2.75164	0.299502	Cspg5
Thap11	0.206664	0.505295	0.298631	Thap11
Tm2d3	0.596023	0.894495	0.298472	Tm2d3
Oaz1	1.91364	2.21193	0.29829	Oaz1
Nme1	0.844413	1.14269	0.298277	Nme1
Slc25a3	1.95001	2.24805	0.298046	Slc25a3
Rnf187	0.701016	0.998417	0.297401	Rnf187
Sec61b	0.730495	1.02774	0.297248	Sec61b
Rer1	0.779504	1.07656	0.297057	Rer1
Aurkaip1	0.651925	0.94851	0.296584	Aurkaip1
Arrb1	0.174558	0.47096	0.296402	Arrb1
Fkbp3	0.987863	1.28391	0.296042	Fkbp3
Atp5g3	1.18022	1.47601	0.295788	Atp5g3
Abhd10	0.208187	0.503587	0.295399	Abhd10
Rexo2	0.722857	1.01818	0.295319	Rexo2
Ak4	0.179458	0.474599	0.295141	Ak4
Chchd1	0.738558	1.03368	0.29512	Chchd1
Ap2a1	0.20149	0.496568	0.295077	Ap2a1
0610012G03Rik	0.887406	1.18242	0.295012	0610012G03Rik
Paqr4	0.268536	0.563414	0.294877	Paqr4
Gcat	0.381088	0.675887	0.294799	Gcat
Cbr1	0.638782	0.933434	0.294652	Cbr1
Rpsa	1.12146	1.41595	0.294484	Rpsa
Rabac1	1.47634	1.77083	0.294482	Rabac1
Msi1	0.329081	0.623216	0.294135	Msi1
Ctbp1	0.483747	0.777482	0.293735	Ctbp1
Ufm1	0.290477	0.583962	0.293485	Ufm1
Ptms	0.938131	1.23153	0.293403	Ptms
Ppa2	0.493297	0.786536	0.293239	Ppa2
Cox7a1	0.0213603	0.314435	0.293074	Cox7a1
Gabarapl2	1.13023	1.42317	0.292938	Gabarapl2
Yipf3	0.614548	0.90718	0.292632	Yipf3
Tmub1	0.113467	0.405508	0.292041	Tmub1
Sucla2	0.458997	0.750998	0.292001	Sucla2
Ndufa3	1.58552	1.87662	0.291106	Ndufa3
Nosip	0.226733	0.51764	0.290907	Nosip
Pdcd4	0.331821	0.622248	0.290427	Pdcd4
Gnb2	1.35292	1.64297	0.290044	Gnb2
Psmd12	0.412242	0.702151	0.289909	Psmd12
Ado	0.0916665	0.380833	0.289166	Ado
Uchl3	0.276222	0.564735	0.288512	Uchl3
Snu13	0.66143	0.949624	0.288194	Snu13
Hnrnpf	0.833497	1.12131	0.287816	Hnrnpf
Gabarapl1	0.608441	0.896017	0.287576	Gabarapl1
Naa38	0.467244	0.754289	0.287045	Naa38
Rps11	1.80558	2.09238	0.2868	Rps11
Hras	0.178797	0.465382	0.286585	Hras
Leprot	0.168101	0.454597	0.286497	Leprot
Ndufaf8	0.445136	0.731483	0.286347	Ndufaf8
Fopnl	0.334679	0.62055	0.285871	Fopnl
Ppib	1.46873	1.75446	0.285726	Ppib
Uri1	0.114184	0.3997	0.285516	Uri1
Hdac1	0.496174	0.781546	0.285372	Hdac1
Arpc5l	0.520318	0.805674	0.285356	Arpc5l
Ociad1	0.762718	1.04784	0.285123	Ociad1
Lix1	1.0039	1.28895	0.285049	Lix1
Acaa1a	0.868568	1.15343	0.284865	Acaa1a
Spcs1	1.31072	1.59556	0.284843	Spcs1
Mageh1	0.92779	1.21257	0.284781	Mageh1
Nsmce1	0.335318	0.619543	0.284224	Nsmce1
Rbm8a	0.592342	0.875958	0.283617	Rbm8a
Sf3b6	1.02341	1.30651	0.283095	Sf3b6
Mat2b	0.452047	0.735046	0.282999	Mat2b
Pyurf	0.526585	0.809536	0.282951	Pyurf
Chchd5	0.135177	0.417935	0.282758	Chchd5
D10Jhu81e	0.47404	0.756668	0.282628	D10Jhu81e
Eef1a1	1.87831	2.16065	0.282337	Eef1a1
Tmem51	0.345608	0.627892	0.282284	Tmem51
Chchd3	0.818597	1.10044	0.281842	Chchd3
Apln	0.295895	0.577651	0.281756	Apln
Phf23	0.124644	0.406243	0.2816	Phf23
Thap2	0.387077	0.668462	0.281386	Thap2
Got2	0.0522391	0.333597	0.281357	Got2
Fundc2	0.340308	0.621588	0.28128	Fundc2
Tkt	1.40676	1.688	0.281236	Tkt
Fubp3	0.169918	0.450908	0.28099	Fubp3
Taok2	0.0677769	0.348712	0.280935	Taok2
Bola2	0.504656	0.785527	0.280871	Bola2
Rpl13a-ps1	0.667943	0.948688	0.280745	Rpl13a-ps1
Trp53rka	0.112867	0.393265	0.280398	Trp53rka
Rpl10a	1.36085	1.64095	0.2801	Rpl10a
Sars	0.41062	0.690498	0.279877	Sars
Fdx1	0.42776	0.707418	0.279658	Fdx1
Ubxn1	0.742954	1.02221	0.279257	Ubxn1
Mtch1	0.530368	0.809426	0.279058	Mtch1
Hscb	0.105398	0.384441	0.279043	Hscb
Mrps6	0.322298	0.600946	0.278648	Mrps6
Mrps21	1.01743	1.29569	0.27826	Mrps21
Rtl8b	0.322448	0.600574	0.278126	Rtl8b
Eef1e1	0.272412	0.550443	0.278031	Eef1e1
Snrpd3	0.713783	0.991634	0.277852	Snrpd3
Slc25a46	0.177118	0.453972	0.276854	Slc25a46
Ube2d1	0.10662	0.383273	0.276653	Ube2d1
Tmem184c	0.243716	0.520162	0.276445	Tmem184c
Dmap1	0.148703	0.424962	0.276259	Dmap1
Nfkbia	0.518932	0.794815	0.275883	Nfkbia
Atp1b3	0.186866	0.46253	0.275664	Atp1b3
Pts	0.648596	0.92423	0.275634	Pts
Smpdl3a	1.24477	1.52039	0.275619	Smpdl3a
Blcap	0.481717	0.757272	0.275555	Blcap
Calm3	1.4491	1.72422	0.275127	Calm3
Efemp1	0.155862	0.430283	0.274421	Efemp1
Srsf4	0.34334	0.617657	0.274317	Srsf4
Eci2	1.09286	1.36674	0.273876	Eci2
Actg1	2.3008	2.57428	0.273478	Actg1
Rpl7l1	0.434588	0.707348	0.27276	Rpl7l1
Rps24	1.75435	2.02699	0.272638	Rps24
Pdzd11	0.342195	0.614731	0.272535	Pdzd11
Uqcc3	0.454959	0.727317	0.272358	Uqcc3
Jam3	0.341702	0.614033	0.272331	Jam3
AI413582	0.664102	0.936263	0.272161	AI413582
Id1	0.469324	0.741296	0.271972	Id1
Polr2c	0.49627	0.767955	0.271685	Polr2c
Glul	3.49346	3.7651	0.271647	Glul
Ccdc85b	0.375559	0.647004	0.271445	Ccdc85b
Ep400	0.201802	0.473225	0.271423	Ep400
Rpp14	0.32547	0.596299	0.270829	Rpp14
Hddc3	0.269819	0.540025	0.270206	Hddc3
Lrrc58	0.773067	1.04323	0.270158	Lrrc58
Mrpl12	0.658641	0.928547	0.269906	Mrpl12
Csnk2b	0.648097	0.917182	0.269084	Csnk2b
Ndufb7	1.10087	1.36993	0.269057	Ndufb7
Ndufb8	1.37183	1.64075	0.268911	Ndufb8
Aldoc	4.2817	4.54988	0.268178	Aldoc
Rpl35	1.07136	1.33949	0.268134	Rpl35
Smu1	0.41966	0.687725	0.268065	Smu1
Hepacam	1.30361	1.57136	0.267755	Hepacam
Myl6	1.3735	1.64097	0.267463	Myl6
Dgcr14	0.0732051	0.34057	0.267365	Dgcr14
Arhgap18	0.0396527	0.306923	0.267271	Arhgap18
Rac1	0.718819	0.986003	0.267184	Rac1
Ogfrl1	0.135557	0.402611	0.267054	Ogfrl1
Snrnp27	0.502297	0.769002	0.266705	Snrnp27
Slc39a1	0.382001	0.648251	0.266251	Slc39a1
Rpl23a	2.03563	2.30183	0.266193	Rpl23a
Stoml2	0.379294	0.645103	0.265808	Stoml2
Nt5m	0.27571	0.541301	0.265591	Nt5m
Mmgt2	0.375848	0.641241	0.265392	Mmgt2
Tbcb	0.634367	0.89975	0.265382	Tbcb
Rps23	2.16446	2.4297	0.265243	Rps23
Dhrs1	0.807215	1.07201	0.2648	Dhrs1
Pa2g4	0.391581	0.656363	0.264782	Pa2g4
Dusp19	0.08662	0.35128	0.26466	Dusp19
Gabarap	1.49209	1.75671	0.264626	Gabarap
Fau	1.88669	2.15109	0.264397	Fau
Vdac3	0.900458	1.16472	0.264258	Vdac3
Anapc13	0.87335	1.13753	0.264183	Anapc13
Scamp5	0.113794	0.377897	0.264103	Scamp5
Srm	0.203539	0.467565	0.264026	Srm
Gpm6a	2.63653	2.90053	0.264003	Gpm6a
Bsg	1.91874	2.18273	0.263993	Bsg
Gng5	1.71553	1.97942	0.263894	Gng5
Cpsf3	0.232775	0.49663	0.263855	Cpsf3
Arf4	1.00944	1.27327	0.263834	Arf4
Rpa2	0.189716	0.453228	0.263512	Rpa2
Mrps18b	0.287577	0.551016	0.263439	Mrps18b
Cops9	1.14763	1.41082	0.263189	Cops9
Nrarp	1.25511	1.5182	0.263089	Nrarp
Aip	0.23011	0.492881	0.262771	Aip
Pafah1b2	0.239875	0.502606	0.262731	Pafah1b2
Pdpn	0.643775	0.906071	0.262296	Pdpn
Nono	0.567852	0.830085	0.262233	Nono
Wdr1	0.378981	0.640481	0.261499	Wdr1
Anapc10	0.39569	0.657156	0.261466	Anapc10
Lamtor4	0.812166	1.07342	0.261255	Lamtor4
Psma1	0.929576	1.19081	0.261233	Psma1
Rpl37a	2.16561	2.42644	0.260833	Rpl37a
Repin1	0.11331	0.373912	0.260602	Repin1
Ier3ip1	0.931876	1.1923	0.260427	Ier3ip1
Rangrf	0.227783	0.487764	0.25998	Rangrf
Trappc3	0.367287	0.627251	0.259964	Trappc3
Txndc17	0.481463	0.7414	0.259936	Txndc17
Grm3	0.533719	0.793529	0.25981	Grm3
Slc25a4	2.56392	2.82302	0.2591	Slc25a4
Erp44	0.581056	0.84015	0.259094	Erp44
Thbs3	0.270465	0.529241	0.258775	Thbs3
Taf13	0.32889	0.587631	0.258741	Taf13
Mrps9	0.202465	0.461135	0.25867	Mrps9
Rhoc	0.575096	0.833358	0.258262	Rhoc
Yaf2	0.383551	0.641709	0.258159	Yaf2
Slc30a10	0.340578	0.598721	0.258143	Slc30a10
Krcc1	0.319616	0.577659	0.258043	Krcc1
Nkiras2	0.0463317	0.304136	0.257804	Nkiras2
Hpca	0.00369169	0.261275	0.257583	Hpca
Tmed3	0.679851	0.937387	0.257536	Tmed3
Amfr	0.456127	0.713652	0.257525	Amfr
Atg16l1	0.0868369	0.344299	0.257462	Atg16l1
Pnrc2	0.660656	0.918081	0.257425	Pnrc2
Banf1	0.516114	0.773209	0.257095	Banf1
Emc10	1.00978	1.26684	0.25707	Emc10
Pex3	0.166862	0.423859	0.256998	Pex3
Ndufab1	1.1523	1.40926	0.256958	Ndufab1
Rhob	0.536941	0.793882	0.256941	Rhob
Ndufc1	1.34515	1.60186	0.256711	Ndufc1
St3gal4	0.633297	0.889933	0.256636	St3gal4
Naa20	0.421327	0.677673	0.256347	Naa20
Ppp3r1	0.234775	0.491078	0.256303	Ppp3r1
Chst2	0.586313	0.84207	0.255756	Chst2
Ssbp3	0.0672091	0.322376	0.255167	Ssbp3
Coa3	0.792254	1.04742	0.255164	Coa3
Bcl10	0.361745	0.616694	0.25495	Bcl10
Hes1	0.773999	1.02868	0.254681	Hes1
Rps13	1.6399	1.89405	0.254155	Rps13
Dctn2	0.799258	1.05319	0.25393	Dctn2
Asb8	0.280263	0.533915	0.253652	Asb8
Exosc4	0.331051	0.584362	0.253311	Exosc4
Hspe1	1.36823	1.62126	0.253027	Hspe1
Ube2a	0.430516	0.683496	0.25298	Ube2a
Sfxn1	0.634667	0.88729	0.252623	Sfxn1
Ccdc90b	0.380695	0.633111	0.252416	Ccdc90b
Cox6c	2.39976	2.65207	0.252303	Cox6c
Afg1l	0.0961243	0.348421	0.252296	Afg1l
Mrpl19	0.115715	0.367773	0.252059	Mrpl19
Stambpl1	0.338028	0.590036	0.252008	Stambpl1
Cib1	0.539606	0.791581	0.251976	Cib1
Cript	0.384725	0.63665	0.251924	Cript
Aspscr1	0.280765	0.532454	0.251689	Aspscr1
Ccdc12	0.567895	0.819507	0.251612	Ccdc12
Timm17a	0.646677	0.89808	0.251403	Timm17a
Tmem167	0.338448	0.589706	0.251258	Tmem167
Gfer	0.0902345	0.341391	0.251157	Gfer
Prkrip1	0.0905429	0.341638	0.251095	Prkrip1
Npepl1	0.325982	0.577022	0.251039	Npepl1
Sh3glb1	0.716432	0.967464	0.251032	Sh3glb1
Pttg1	0.848736	1.09964	0.250904	Pttg1
Snrpe	0.759128	1.00996	0.250833	Snrpe
Nudt3	0.299714	0.550427	0.250712	Nudt3
Sept4	0.46863	0.719193	0.250563	Sept4
Tmem14c	0.632835	0.883386	0.250551	Tmem14c
Arpc3	0.624184	0.874593	0.250409	Arpc3
Polr2g	0.464645	0.715019	0.250374	Polr2g
Ech1	1.02823	1.27849	0.250262	Ech1
Aatk	0.121195	0.371357	0.250162	Aatk
Mtfr1l	0.481035	0.731118	0.250083	Mtfr1l
Ppp2r2d	0.0333799	0.283442	0.250062	Ppp2r2d
Pdk2	0.475785	0.725815	0.25003	Pdk2
Gpx1	0.265713	0.515713	0.25	Gpx1
Hmgcl	0.147264	0.397236	0.249972	Hmgcl
Gpd1	0.188408	0.438305	0.249896	Gpd1
Abhd17b	0.288693	0.538354	0.249661	Abhd17b
Lamtor1	0.762457	1.01207	0.249612	Lamtor1
Rnf44	0.00999609	0.259496	0.2495	Rnf44
Cyc1	1.4233	1.67257	0.249271	Cyc1
Pax6	0.418762	0.667941	0.249179	Pax6
Eif3e	0.526991	0.776165	0.249174	Eif3e
Dusp1	0.171938	0.421002	0.249064	Dusp1
Enoph1	0.173106	0.421898	0.248792	Enoph1
Mrps16	0.805458	1.05416	0.2487	Mrps16
Ldhb	2.73428	2.98264	0.248359	Ldhb
Tpgs2	0.348994	0.597316	0.248322	Tpgs2
Snrpa	0.387467	0.635785	0.248318	Snrpa
Gnb1	1.02223	1.2705	0.248274	Gnb1
Eif2b3	0.204688	0.452767	0.248079	Eif2b3
Lypd6	0.0242236	0.272203	0.24798	Lypd6
Mrpl54	0.27943	0.5269	0.24747	Mrpl54
Ddx3y	0.487198	0.734264	0.247067	Ddx3y
Mrps36	0.748608	0.995587	0.246979	Mrps36
Dhrs7	0.92525	1.17217	0.246925	Dhrs7
Gldc	0.437302	0.683749	0.246448	Gldc
Bdh1	0.418319	0.664518	0.246199	Bdh1
Gnptg	0.507984	0.753713	0.245729	Gnptg
Prelid1	0.294402	0.540058	0.245656	Prelid1
Tmem126b	0.136137	0.381751	0.245614	Tmem126b
Dennd1b	0.0266168	0.272164	0.245547	Dennd1b
Hspb11	0.174665	0.419504	0.24484	Hspb11
Slc45a1	0	0.244243	0.244243	Slc45a1
Acy1	0.245263	0.489184	0.243921	Acy1
Ube2s	0.702507	0.946211	0.243704	Ube2s
Pcbp4	0.363404	0.606937	0.243534	Pcbp4
Ubb	3.03677	3.28017	0.243394	Ubb
Asf1a	0.378295	0.621607	0.243312	Asf1a
Lyrm4	0.235264	0.478569	0.243305	Lyrm4
Ptp4a3	0.0895326	0.332574	0.243041	Ptp4a3
Qrich1	0.203126	0.446128	0.243002	Qrich1
Got1	0.287453	0.53042	0.242967	Got1
Sbk1	0.169147	0.412023	0.242876	Sbk1
Fbxo25	0.0330352	0.275851	0.242816	Fbxo25
Mpc1	1.93043	2.17322	0.242794	Mpc1
Mcrs1	0.494632	0.737292	0.24266	Mcrs1
Mrps26	0.435326	0.677904	0.242578	Mrps26
Rpl36	1.84607	2.08832	0.242246	Rpl36
Tmem41b	0.333589	0.575782	0.242192	Tmem41b
Xpnpep1	0.282041	0.524154	0.242113	Xpnpep1
Gsto1	0.141613	0.383459	0.241846	Gsto1
Gcsh	0.890856	1.1325	0.241644	Gcsh
Vopp1	0.0579291	0.299371	0.241442	Vopp1
Ppp1r7	0.273392	0.514727	0.241335	Ppp1r7
Hhatl	0.0727448	0.314012	0.241267	Hhatl
Psmd3	0.306555	0.547385	0.24083	Psmd3
Stk39	0.0662787	0.307069	0.24079	Stk39
Rps6	1.66028	1.9006	0.24032	Rps6
Zgpat	0.136211	0.37645	0.240238	Zgpat
Cnnm2	0.0158961	0.255935	0.240039	Cnnm2
Rgs20	0.639401	0.879418	0.240016	Rgs20
Idh3a	0.699559	0.939236	0.239677	Idh3a
Ifngr2	0.024726	0.264263	0.239537	Ifngr2
Entpd5	0.0925171	0.332014	0.239497	Entpd5
Cdc42ep4	0.629314	0.868586	0.239272	Cdc42ep4
Rae1	0.266399	0.505433	0.239035	Rae1
Msra	0.0341506	0.273105	0.238954	Msra
1500011K16Rik	0.669239	0.90815	0.238911	1500011K16Rik
AU040320	0.0967584	0.335164	0.238405	AU040320
Rps16	1.72245	1.96084	0.238382	Rps16
Mrpl14	0.583293	0.821427	0.238134	Mrpl14
Ndufv1	0.951591	1.18961	0.238022	Ndufv1
Zfp61	0.0632924	0.300846	0.237553	Zfp61
AC154683.1	0.283081	0.520436	0.237355	AC154683.1
Gm6710	0.240281	0.477344	0.237063	Gm6710
Cbs	0.832146	1.06905	0.236902	Cbs
Psmb1	1.27513	1.51199	0.236857	Psmb1
Casp6	0.122458	0.359308	0.23685	Casp6
Nim1k	0.986301	1.22294	0.23664	Nim1k
Rps15a	1.63732	1.87349	0.236163	Rps15a
Ythdf3	0.170554	0.406616	0.236062	Ythdf3
Hnrnpab	0.238098	0.474051	0.235953	Hnrnpab
Dhrs3	0.784219	1.0194	0.235177	Dhrs3
Plpp4	0.0356159	0.270392	0.234776	Plpp4
Atp6v0e	1.38808	1.62211	0.234031	Atp6v0e
Bicdl1	0.115756	0.349557	0.233801	Bicdl1
Fam229b	0.266996	0.500534	0.233538	Fam229b
Rtca	0.169234	0.402283	0.233049	Rtca
Vtn	0.491186	0.724232	0.233046	Vtn
Wbp2	1.06789	1.30067	0.232778	Wbp2
Slc25a17	0.404425	0.636576	0.232151	Slc25a17
Sec23a	0.157993	0.389916	0.231923	Sec23a
1810037I17Rik	1.58231	1.81423	0.23192	1810037I17Rik
Zfp219	0.354724	0.586567	0.231842	Zfp219
Nt5c3b	0.195537	0.427367	0.231829	Nt5c3b
Pnkp	0.169212	0.400975	0.231763	Pnkp
Epdr1	0.774453	1.00618	0.231726	Epdr1
Mrpl1	0.0103886	0.242009	0.23162	Mrpl1
Psmb5	1.17155	1.40309	0.231547	Psmb5
2410004B18Rik	0.296604	0.527907	0.231303	2410004B18Rik
Nap1l1	0.582668	0.813929	0.231262	Nap1l1
Prdx5	1.13054	1.36175	0.231218	Prdx5
Mrpl21	0.476952	0.708153	0.231202	Mrpl21
Snrpc	0.454859	0.685841	0.230982	Snrpc
Rpl8	1.62977	1.86064	0.230864	Rpl8
Ube2i	0.368804	0.599564	0.23076	Ube2i
Atp6v0d1	0.824771	1.05553	0.230754	Atp6v0d1
2310035C23Rik	0.151914	0.382508	0.230594	2310035C23Rik
Emc9	0.339705	0.570268	0.230563	Emc9
Vdac1	1.13956	1.37004	0.23048	Vdac1
Exosc5	0.244314	0.474418	0.230104	Exosc5
Atg5	0.207179	0.437126	0.229947	Atg5
Hagh	0.677332	0.907193	0.229861	Hagh
Oxnad1	0.165203	0.394998	0.229795	Oxnad1
Psmc4	0.823459	1.05312	0.229664	Psmc4
Eprs	0.503749	0.733131	0.229382	Eprs
Mlf2	1.40467	1.63405	0.229382	Mlf2
Gm2000	0.404954	0.634332	0.229378	Gm2000
Hibadh	0.960419	1.18952	0.229101	Hibadh
Pih1d1	0.101043	0.329808	0.228765	Pih1d1
Slc1a4	0.513966	0.74272	0.228754	Slc1a4
Ssr2	0.807692	1.03624	0.228548	Ssr2
Atp5j	2.17962	2.40801	0.228394	Atp5j
Plekhb2	0.331702	0.559622	0.22792	Plekhb2
Amdhd2	0.144941	0.37222	0.227279	Amdhd2
Cdc37	0.299122	0.526377	0.227255	Cdc37
Pin1	0.600526	0.827705	0.22718	Pin1
Tnfrsf19	0.297952	0.525119	0.227168	Tnfrsf19
Llph	0.230846	0.457803	0.226957	Llph
Atp5o.1	1.73937	1.96601	0.226646	Atp5o.1
Scg3	2.01599	2.24256	0.226567	Scg3
Uqcc2	0.925711	1.15222	0.226509	Uqcc2
Cers2	0.267766	0.494248	0.226482	Cers2
Slc44a1	0.121939	0.3483	0.226361	Slc44a1
Emc3	1.11532	1.3415	0.226179	Emc3
Nat8f5	0.222832	0.448958	0.226127	Nat8f5
Znrd1	0.223213	0.449307	0.226094	Znrd1
1110059E24Rik	0.402127	0.628025	0.225898	1110059E24Rik
Ndufv3	1.13076	1.35661	0.225851	Ndufv3
Vta1	0.570393	0.796176	0.225782	Vta1
Gm7324	0.0949276	0.320673	0.225745	Gm7324
Mtmr14	0.0156985	0.241241	0.225543	Mtmr14
D17Wsu92e	0.075546	0.300904	0.225358	D17Wsu92e
Fah	0.295094	0.520282	0.225187	Fah
Cox17	1.01348	1.23849	0.22501	Cox17
Ilf2	0.482081	0.70699	0.224909	Ilf2
Cyfip2	0.0284039	0.253307	0.224903	Cyfip2
Paip2	0.926813	1.15154	0.22473	Paip2
Mbd3	0.350381	0.574964	0.224583	Mbd3
Nat8f1	1.22694	1.45147	0.224527	Nat8f1
Nsmce2	0.155732	0.380169	0.224438	Nsmce2
0610037L13Rik	0.30821	0.532625	0.224415	0610037L13Rik
Mgst3	0.22384	0.448015	0.224174	Mgst3
Ing1	0.146243	0.370354	0.224111	Ing1
Sema4d	0.0440372	0.268048	0.224011	Sema4d
Impdh2	0.394374	0.618303	0.22393	Impdh2
Fam168b	0.278329	0.502121	0.223792	Fam168b
Dynll2	0.640375	0.863936	0.22356	Dynll2
Rps21	1.69937	1.92293	0.223554	Rps21
Vdac2	1.27813	1.50143	0.223296	Vdac2
Cux1	0.294	0.517265	0.223264	Cux1
Rps18	1.61008	1.83326	0.223178	Rps18
Ubqln2	0.538008	0.761096	0.223088	Ubqln2
Ube2d2a	0.670115	0.893123	0.223008	Ube2d2a
Gtf2h5	0.678713	0.901667	0.222955	Gtf2h5
Cstf3	0.248545	0.471214	0.222668	Cstf3
Nat8	0.243607	0.466267	0.22266	Nat8
Rbm3	0.723445	0.946103	0.222659	Rbm3
Arfrp1	0.389174	0.611498	0.222324	Arfrp1
Slc15a2	0.699435	0.921411	0.221976	Slc15a2
Rmnd5b	0.166595	0.388447	0.221851	Rmnd5b
Nkd1	0.0476924	0.269328	0.221636	Nkd1
Pgk1	1.36232	1.58375	0.221431	Pgk1
Rps19	1.86952	2.09058	0.221057	Rps19
Serinc3	0.612975	0.833932	0.220957	Serinc3
G0s2	0.407714	0.628583	0.220869	G0s2
Phyh	1.10412	1.32492	0.2208	Phyh
Tcf7l2	0.444286	0.665021	0.220735	Tcf7l2
Acadl	0.795229	1.0159	0.22067	Acadl
Eif3i	0.717516	0.938097	0.220582	Eif3i
Arl8a	0.470357	0.690924	0.220567	Arl8a
Nudt9	0.83456	1.05505	0.220493	Nudt9
Hnrnpk	1.67779	1.89811	0.220323	Hnrnpk
Rtn3	1.35049	1.57079	0.220301	Rtn3
Chgb	0.0669305	0.287226	0.220296	Chgb
Ass1	0.345011	0.565204	0.220193	Ass1
Tifa	0.369133	0.589207	0.220074	Tifa
Tsr3	0.324724	0.544504	0.21978	Tsr3
Kirrel2	0.145804	0.365291	0.219487	Kirrel2
Slc35a4	0.389363	0.607944	0.218581	Slc35a4
Ndufa12	1.73593	1.95428	0.218347	Ndufa12
Pfdn1	0.959347	1.17753	0.218185	Pfdn1
Mvb12a	0.418154	0.636316	0.218162	Mvb12a
Sptssa	0.578865	0.796978	0.218113	Sptssa
Slc30a6	0.102611	0.320697	0.218086	Slc30a6
Dnajc19	0.642685	0.860625	0.217941	Dnajc19
Tmem38a	0.336512	0.554446	0.217933	Tmem38a
Lmcd1	0.416983	0.634891	0.217908	Lmcd1
Arpc1a	0.708932	0.926782	0.21785	Arpc1a
BC003965	0.294175	0.511967	0.217792	BC003965
Cldnd1	1.00394	1.2215	0.217557	Cldnd1
Edf1	1.44481	1.66213	0.21732	Edf1
Snrpg	0.65377	0.870986	0.217216	Snrpg
Ap3s1	0.399312	0.616243	0.216931	Ap3s1
Asnsd1	0.121235	0.338053	0.216817	Asnsd1
1110008F13Rik	0.708671	0.92547	0.216799	1110008F13Rik
Gm10053	0.139928	0.356465	0.216537	Gm10053
Rpl32	1.88031	2.09681	0.2165	Rpl32
Nifk	0.131846	0.348207	0.21636	Nifk
Aldh2	1.16003	1.37602	0.215987	Aldh2
Gatd1	0.158318	0.374192	0.215874	Gatd1
Rap1a	0.513085	0.72872	0.215635	Rap1a
Smpd1	0.851594	1.06705	0.215457	Smpd1
Ccdc43	0.153063	0.368509	0.215446	Ccdc43
Bbs7	0.076296	0.291472	0.215176	Bbs7
Rtkn	0.0387632	0.253885	0.215122	Rtkn
Txnrd2	0.096183	0.311298	0.215115	Txnrd2
Setd3	0.288498	0.50349	0.214992	Setd3
Lgr4	0.380848	0.595647	0.214799	Lgr4
Dmac1	0.375697	0.590309	0.214612	Dmac1
Olfml1	0.154376	0.368904	0.214528	Olfml1
St6galnac4	0.245043	0.459305	0.214262	St6galnac4
St6galnac5	0.409388	0.623594	0.214207	St6galnac5
Ift43	0.301006	0.515153	0.214147	Ift43
Wscd1	0.883138	1.09725	0.214107	Wscd1
Ube2ql1	0	0.214103	0.214103	Ube2ql1
Prr3	0.195361	0.409137	0.213776	Prr3
Hes5	2.39108	2.60468	0.213599	Hes5
Ifrd1	0.360959	0.574545	0.213586	Ifrd1
Pygm	0.678667	0.892204	0.213537	Pygm
Me1	0.542483	0.755778	0.213295	Me1
Camkk2	0.0868809	0.299853	0.212972	Camkk2
Mrpl38	0.343859	0.556677	0.212818	Mrpl38
Alkbh3	0.0792344	0.292015	0.212781	Alkbh3
Tmem11	0.257428	0.470004	0.212576	Tmem11
Dpy30	0.443507	0.656003	0.212496	Dpy30
Ckap4	0.0135243	0.225731	0.212206	Ckap4
Dnal4	0.343122	0.555197	0.212075	Dnal4
Srsf7	0.653979	0.865842	0.211863	Srsf7
Rpl15	1.72881	1.94059	0.211775	Rpl15
Elovl1	0.275513	0.487284	0.211771	Elovl1
Zfp672	0.277757	0.489479	0.211722	Zfp672
Tmem147	0.876332	1.08803	0.211694	Tmem147
Flot1	0.307655	0.519297	0.211642	Flot1
Eif2b1	0.158901	0.370511	0.21161	Eif2b1
Mrpl32	0.423694	0.635235	0.211541	Mrpl32
Arfip1	0.0876905	0.299144	0.211453	Arfip1
Cant1	0.0927942	0.304224	0.211429	Cant1
Tfpt	0.0593512	0.270716	0.211365	Tfpt
Taf9b	0.136033	0.347395	0.211362	Taf9b
Cd63	2.65664	2.8679	0.211264	Cd63
Qdpr	0.659163	0.870403	0.21124	Qdpr
Pde8b	0.110878	0.3219	0.211022	Pde8b
Cdkn2c	0.0461731	0.257194	0.211021	Cdkn2c
Ccndbp1	0.229837	0.440723	0.210887	Ccndbp1
Cyth1	0.157149	0.368003	0.210854	Cyth1
Kdm6a	0.012625	0.223431	0.210806	Kdm6a
Arhgef10	0.200806	0.411583	0.210777	Arhgef10
Tfdp1	0.0252178	0.235856	0.210639	Tfdp1
Ly96	0.0231915	0.233752	0.21056	Ly96
Sec61g	1.29774	1.50811	0.210377	Sec61g
Mid1ip1	1.971	2.18088	0.209873	Mid1ip1
Mcts1	0.442967	0.652827	0.20986	Mcts1
1110051M20Rik	0.17941	0.389136	0.209726	1110051M20Rik
Sac3d1	0.0896973	0.299402	0.209705	Sac3d1
Cops6	0.780434	0.989756	0.209322	Cops6
Ranbp3	0.190938	0.400126	0.209188	Ranbp3
Tysnd1	0.245836	0.45485	0.209013	Tysnd1
Calm2	1.18817	1.39667	0.208502	Calm2
Ndufa1	0.879611	1.08805	0.208438	Ndufa1
1700086O06Rik	0.107402	0.315827	0.208425	1700086O06Rik
Clybl	0.2568	0.46503	0.20823	Clybl
Spry2	0.852134	1.06029	0.208158	Spry2
Gstp1	0.263245	0.471261	0.208017	Gstp1
0610030E20Rik	0.329365	0.537042	0.207676	0610030E20Rik
Tmem176a	1.17295	1.38051	0.207558	Tmem176a
Chac2	0.208415	0.415964	0.207549	Chac2
Trappc1	0.475374	0.682911	0.207538	Trappc1
Wdr83os	0.449663	0.657117	0.207453	Wdr83os
Cenpx	0.326199	0.533581	0.207383	Cenpx
1110059G10Rik	0.176755	0.384062	0.207307	1110059G10Rik
Efhd1	0.412813	0.620008	0.207195	Efhd1
Cyhr1	0.805373	1.01256	0.207189	Cyhr1
Aen	0.244226	0.451254	0.207028	Aen
Rpl30	1.43109	1.63797	0.206878	Rpl30
Pfdn4	0.268944	0.475412	0.206467	Pfdn4
Gpatch11	0.26832	0.474743	0.206423	Gpatch11
Ube2n	0.909222	1.11553	0.206306	Ube2n
Cox10	0.189743	0.396003	0.20626	Cox10
Lgals1	0.722336	0.928546	0.20621	Lgals1
BC005537	0.214089	0.420239	0.20615	BC005537
Araf	0.456538	0.662538	0.206	Araf
Mettl23	0.459681	0.665664	0.205983	Mettl23
Snx24	0.0554493	0.261316	0.205866	Snx24
Ptgr2	0.670638	0.876336	0.205698	Ptgr2
Pdcl	0.139806	0.345367	0.205562	Pdcl
Mrpl57	0.448578	0.653828	0.205251	Mrpl57
Pdcd10	0.807126	1.01221	0.205082	Pdcd10
Wdr89	0.492077	0.696927	0.204849	Wdr89
Eif3l	0.482211	0.687047	0.204837	Eif3l
Gpi1	1.32563	1.53025	0.20462	Gpi1
Ndufb3	1.08188	1.28641	0.204539	Ndufb3
Hmgcr	0.70541	0.909779	0.204369	Hmgcr
Ndufb10	1.69852	1.90211	0.203582	Ndufb10
Coq10a	0.241904	0.445109	0.203205	Coq10a
St6gal1	0.0165533	0.219663	0.20311	St6gal1
Scand1	0.490414	0.693108	0.202694	Scand1
Vps28	0.876078	1.07871	0.202634	Vps28
Asb6	0.0794353	0.281819	0.202383	Asb6
Tcp1	0.469787	0.67195	0.202163	Tcp1
Slc2a8	0.374391	0.576498	0.202107	Slc2a8
Sf3b3	0.23156	0.433618	0.202058	Sf3b3
Bcl7b	0.365809	0.567826	0.202016	Bcl7b
Raly	0.422128	0.624057	0.201929	Raly
Higd2a	1.2318	1.43341	0.201613	Higd2a
Manbal	0.925735	1.12719	0.201456	Manbal
Smim11	0.602444	0.803827	0.201383	Smim11
Pnp	0.306691	0.508067	0.201377	Pnp
Hopx	0.312575	0.513818	0.201243	Hopx
Gabbr1	1.31176	1.51283	0.201077	Gabbr1
Rpl27a	1.68702	1.88793	0.200911	Rpl27a
Srsf2	1.133	1.33386	0.200854	Srsf2
Bnip3	0.280826	0.481645	0.200818	Bnip3
Mark2	0.169636	0.370352	0.200716	Mark2
Tlnrd1	0.103604	0.304029	0.200425	Tlnrd1
Bloc1s2	0.149689	0.349715	0.200025	Bloc1s2
Gm10036	0.214019	0.413768	0.199749	Gm10036
Gm15417	0.281209	0.480919	0.19971	Gm15417
Ppp4c	0.328225	0.527859	0.199634	Ppp4c
Lsm3	0.221231	0.420695	0.199465	Lsm3
Sf3b5	0.573561	0.772998	0.199437	Sf3b5
Tmco1	1.04391	1.24328	0.199371	Tmco1
Slirp	0.911867	1.1112	0.199332	Slirp
Chic2	0.45779	0.65706	0.199271	Chic2
Abhd2	0.225769	0.42501	0.199241	Abhd2
Kifc3	0.27598	0.475155	0.199175	Kifc3
Tbc1d20	0.0284039	0.227561	0.199157	Tbc1d20
Arhgap10	0.0165049	0.21548	0.198975	Arhgap10
Dnase2a	0.125677	0.324557	0.19888	Dnase2a
Park7	1.34936	1.54789	0.198532	Park7
Pcbd2	0.404252	0.602717	0.198465	Pcbd2
AW209491	0.128584	0.327041	0.198458	AW209491
Tmem258	0.686717	0.884886	0.198168	Tmem258
Asah1	0.88676	1.0849	0.198143	Asah1
Ythdf2	0.128093	0.326212	0.198119	Ythdf2
1700123O20Rik	0.362171	0.560187	0.198016	1700123O20Rik
Usp46	0.0639674	0.261797	0.197829	Usp46
Pde12	0.101371	0.298848	0.197476	Pde12
Cnr1	0	0.197157	0.197157	Cnr1
Ppp1r2	0.56356	0.760717	0.197157	Ppp1r2
Ergic3	0.98169	1.17875	0.197057	Ergic3
Sept9	0.284903	0.481681	0.196778	Sept9
Mob1a	0.0731189	0.269735	0.196616	Mob1a
Dgcr6	0.883998	1.08057	0.196569	Dgcr6
Dnaja3	0.250257	0.446761	0.196503	Dnaja3
Fbxw5	0.302353	0.498786	0.196434	Fbxw5
Pck2	0.0845184	0.280731	0.196212	Pck2
Itpk1	0.0754106	0.271596	0.196186	Itpk1
Ankrd40	0.276895	0.472923	0.196028	Ankrd40
Exosc3	0.28552	0.481285	0.195765	Exosc3
Sox11	0.0467446	0.242474	0.19573	Sox11
Cul4a	0.152224	0.347817	0.195593	Cul4a
Znhit3	0.190088	0.385642	0.195554	Znhit3
Tmem50b	0.198426	0.393972	0.195546	Tmem50b
Eif4a3	0.487191	0.682657	0.195467	Eif4a3
Ube2e2	0.115824	0.311147	0.195323	Ube2e2
Pcp4	0.260587	0.455757	0.195171	Pcp4
Slc17a7	0.0694361	0.264334	0.194898	Slc17a7
Senp7	0.128155	0.323042	0.194886	Senp7
Btbd2	0.142049	0.336833	0.194784	Btbd2
Fam163a	0.170096	0.364766	0.194671	Fam163a
Ermp1	0.202995	0.397396	0.194401	Ermp1
Atp5b	2.30444	2.4988	0.194367	Atp5b
Rida	1.12775	1.32202	0.19427	Rida
Acat1	0.744658	0.938855	0.194197	Acat1
Gpr137b	0.221824	0.41602	0.194196	Gpr137b
Mrpl58	0.621966	0.816156	0.19419	Mrpl58
Eif3g	0.7709	0.964996	0.194096	Eif3g
Prodh	0.891114	1.08506	0.193942	Prodh
Psmc3	0.838593	1.03245	0.193858	Psmc3
Morf4l1	1.62433	1.8181	0.19377	Morf4l1
Snx17	0.66513	0.858777	0.193647	Snx17
S100a13	1.35015	1.54376	0.193615	S100a13
Taf12	0.108621	0.30222	0.1936	Taf12
Mapre1	0.879847	1.07335	0.193505	Mapre1
Endog	0.510206	0.703666	0.193459	Endog
Ankrd9	0.188937	0.382388	0.193451	Ankrd9
Kbtbd7	0.0224733	0.215921	0.193447	Kbtbd7
Naca	1.39838	1.59178	0.193402	Naca
Impact	0.489137	0.682386	0.193249	Impact
Gtf2b	0.534523	0.727513	0.19299	Gtf2b
Pir	0.101758	0.29462	0.192862	Pir
Aars	0.229642	0.422405	0.192763	Aars
Smn1	0.097287	0.290021	0.192734	Smn1
Ubl7	0.378303	0.570963	0.19266	Ubl7
Copz1	0.354153	0.546663	0.192509	Copz1
Akr1b10	0.480173	0.672625	0.192451	Akr1b10
Rnf5	0.881714	1.0739	0.192189	Rnf5
Unc50	0.68074	0.872728	0.191987	Unc50
Mtch2	0.931725	1.12354	0.191813	Mtch2
Gtf3a	0.181295	0.373091	0.191796	Gtf3a
Cdc42	1.42931	1.62109	0.191785	Cdc42
D230025D16Rik	0	0.191603	0.191603	D230025D16Rik
Zdhhc2	0.0621006	0.253657	0.191556	Zdhhc2
Timm10	0.247729	0.4392	0.191471	Timm10
Urod	0.252724	0.444012	0.191287	Urod
Ggt7	0.176834	0.368101	0.191268	Ggt7
Slitrk2	0.628977	0.820231	0.191254	Slitrk2
Bax	0.79258	0.98372	0.19114	Bax
Cdadc1	0.102358	0.293294	0.190936	Cdadc1
Ccdc107	0.587931	0.778863	0.190932	Ccdc107
Pnkd	1.16567	1.35648	0.190806	Pnkd
Sarnp	0.374044	0.564632	0.190587	Sarnp
Nme7	0.181632	0.372206	0.190574	Nme7
Rpl35a	1.83622	2.02676	0.190533	Rpl35a
Tom1	0.543856	0.734385	0.190529	Tom1
Tsen34	0.844006	1.03444	0.190439	Tsen34
Fads1	0.726736	0.917161	0.190425	Fads1
Tubgcp4	0.153488	0.343812	0.190324	Tubgcp4
Mrm1	0.0491023	0.239317	0.190214	Mrm1
Nop2	0.0773885	0.267581	0.190193	Nop2
Tmem191c	0.184879	0.375023	0.190144	Tmem191c
Arl2	0.625218	0.815082	0.189865	Arl2
Psmd6	0.581117	0.770962	0.189846	Psmd6
Msl3l2	0.0935706	0.283304	0.189734	Msl3l2
Bcan	2.4427	2.63242	0.189718	Bcan
Ifnar2	0.370868	0.560552	0.189684	Ifnar2
Bloc1s6	0.138425	0.328043	0.189618	Bloc1s6
2900011O08Rik	0.0883132	0.277571	0.189258	2900011O08Rik
Fkbp8	0.849456	1.03863	0.189177	Fkbp8
Xbp1	0.496538	0.685565	0.189027	Xbp1
Kctd6	0.105626	0.294652	0.189026	Kctd6
Fads2	0.629684	0.818488	0.188804	Fads2
D130020L05Rik	0.0969903	0.285519	0.188528	D130020L05Rik
Dusp6	0.145065	0.333378	0.188313	Dusp6
Dusp15	0.171368	0.359557	0.188189	Dusp15
Ube2d3	0.976827	1.16437	0.187547	Ube2d3
Zfp523	0.154025	0.34157	0.187545	Zfp523
Igfbp7	0.056534	0.243883	0.187349	Igfbp7
Map1lc3b	1.62056	1.80776	0.187201	Map1lc3b
Vps37b	0.207747	0.394587	0.18684	Vps37b
Trim45	0	0.186591	0.186591	Trim45
Pdrg1	0.370187	0.556559	0.186372	Pdrg1
Rplp2	1.57976	1.76568	0.185918	Rplp2
Gm10269	0.201591	0.387373	0.185782	Gm10269
Tsg101	0.508967	0.694599	0.185631	Tsg101
Ss18l2	0.554328	0.739875	0.185547	Ss18l2
Adipor1	0.43456	0.620037	0.185477	Adipor1
Smarcd3	0.39725	0.582614	0.185363	Smarcd3
Pls3	0.287592	0.472946	0.185354	Pls3
Med19	0.312228	0.497484	0.185255	Med19
Cth	0.20552	0.390709	0.185188	Cth
Cacnb1	0.145733	0.330726	0.184993	Cacnb1
Amer2	0.532279	0.717266	0.184988	Amer2
Olfr287	0.0224621	0.206961	0.184499	Olfr287
Pdzd8	0.125444	0.30988	0.184436	Pdzd8
Mgmt	0.0781975	0.262517	0.18432	Mgmt
Ppp1r1b	0.579449	0.763667	0.184218	Ppp1r1b
Zc3hc1	0.0751372	0.259296	0.184158	Zc3hc1
Agap2	0	0.184016	0.184016	Agap2
Gpr19	0.49529	0.679268	0.183978	Gpr19
Gpr37l1	3.02446	3.20823	0.183772	Gpr37l1
Kalrn	0.17511	0.358818	0.183707	Kalrn
Lipe	0.338783	0.522211	0.183428	Lipe
Sypl2	0.0715373	0.254826	0.183289	Sypl2
Yars	0.321126	0.504392	0.183267	Yars
Eef1g	1.15505	1.33826	0.183202	Eef1g
Eif6	0.611104	0.794178	0.183074	Eif6
Rpl3	2.00209	2.18498	0.182889	Rpl3
Nedd8	1.09589	1.27871	0.182818	Nedd8
Cct8	0.813721	0.996389	0.182669	Cct8
Srek1ip1	0.272825	0.455432	0.182607	Srek1ip1
Commd9	0.395106	0.57762	0.182514	Commd9
Bysl	0.0775272	0.259904	0.182377	Bysl
Yae1d1	0.541048	0.723102	0.182054	Yae1d1
Golph3	0.128153	0.310106	0.181953	Golph3
Cuedc1	0.453142	0.635063	0.181921	Cuedc1
Unc93b1	0.0216477	0.203566	0.181918	Unc93b1
Mtfmt	0.0201198	0.201769	0.181649	Mtfmt
Sowahc	0.0337302	0.215321	0.181591	Sowahc
Elp6	0.0185119	0.199992	0.18148	Elp6
Ppp1r16a	0.232321	0.41377	0.181449	Ppp1r16a
Hmgn3	1.23184	1.41329	0.181448	Hmgn3
Lsg1	0.121025	0.302313	0.181287	Lsg1
Plekho1	0.0738379	0.255037	0.181199	Plekho1
Mrps11	0.602208	0.783403	0.181194	Mrps11
Ppp1r9b	0.158272	0.339319	0.181047	Ppp1r9b
Med21	0.537382	0.718324	0.180942	Med21
Med8	0.178249	0.359096	0.180847	Med8
Ift80	0.0363767	0.217174	0.180798	Ift80
Gnb5	0.414793	0.595553	0.18076	Gnb5
Trp53bp1	0.101133	0.281809	0.180676	Trp53bp1
Bloc1s5	0.0422213	0.222849	0.180627	Bloc1s5
Lrtm2	0.345303	0.525905	0.180602	Lrtm2
Cptp	0.0299927	0.210574	0.180582	Cptp
Rpl38	1.96263	2.14306	0.180432	Rpl38
Rpl13	2.34348	2.52376	0.180284	Rpl13
Dad1	1.60428	1.78434	0.18006	Dad1
Wsb2	0.0372508	0.21723	0.17998	Wsb2
Uba52	0.293908	0.473835	0.179927	Uba52
Elavl1	0.45892	0.6386	0.17968	Elavl1
Dxo	0.077366	0.257018	0.179652	Dxo
Chrdl1	0.142118	0.321728	0.17961	Chrdl1
Snap47	0.607298	0.786864	0.179565	Snap47
Ramp2	0.523196	0.702616	0.17942	Ramp2
Tbc1d16	0.0114807	0.19082	0.179339	Tbc1d16
Atp1b2	2.15593	2.33526	0.179332	Atp1b2
Mknk1	0.0179144	0.197241	0.179326	Mknk1
Sod1	0.593727	0.773045	0.179318	Sod1
Praf2	0.311442	0.490697	0.179255	Praf2
Surf4	0.292118	0.471368	0.179251	Surf4
Por	0.573139	0.752352	0.179214	Por
Lrrc57	0.13446	0.313602	0.179141	Lrrc57
Arpin	0.12171	0.300768	0.179059	Arpin
Ncdn	0.202509	0.381498	0.178989	Ncdn
Tacc2	0.0319721	0.2108	0.178828	Tacc2
Slc39a3	0.152942	0.33161	0.178668	Slc39a3
Clu	4.18996	4.3686	0.178633	Clu
Chst1	1.30993	1.48837	0.178433	Chst1
Hacd1	0.184796	0.363097	0.178301	Hacd1
Hypk	0.534157	0.71231	0.178153	Hypk
Ormdl2	0.380886	0.559036	0.17815	Ormdl2
Anln	0.0314507	0.20951	0.17806	Anln
Pigyl	0.57975	0.757738	0.177988	Pigyl
Trpt1	0.221175	0.399126	0.17795	Trpt1
Tbrg1	0.341918	0.519825	0.177907	Tbrg1
Fkbp2	1.02048	1.19835	0.177868	Fkbp2
E2f5	0.255973	0.433832	0.177859	E2f5
Relt	0.0896996	0.267371	0.177671	Relt
Fos	0.0748147	0.252312	0.177497	Fos
Eif1ad	0.211652	0.389122	0.17747	Eif1ad
Mospd1	0.0898791	0.267312	0.177433	Mospd1
Dhrs11	0.15805	0.335464	0.177414	Dhrs11
Vrk3	0.281605	0.45882	0.177214	Vrk3
Pno1	0.232665	0.409872	0.177207	Pno1
Ube2v2	0.793486	0.970671	0.177185	Ube2v2
Phgdh	2.23925	2.41639	0.177133	Phgdh
Rack1	0.628245	0.805374	0.177129	Rack1
Prdx2	1.55766	1.73473	0.177065	Prdx2
Cisd3	0.234582	0.411599	0.177018	Cisd3
Mrpl23	0.66966	0.846538	0.176878	Mrpl23
Nudt19	0.835931	1.01275	0.176824	Nudt19
Ywhab	0.640131	0.816899	0.176769	Ywhab
Gtf2i	0.463881	0.640406	0.176525	Gtf2i
Vamp2	0.396669	0.573121	0.176452	Vamp2
Pik3r2	0.0538004	0.230241	0.176441	Pik3r2
Ergic1	0.10658	0.283002	0.176422	Ergic1
Ezh1	0.0552843	0.231631	0.176346	Ezh1
Tmem14a	0.467851	0.64405	0.176199	Tmem14a
Tmco3	0.551848	0.727871	0.176023	Tmco3
Cib2	0.207324	0.383128	0.175804	Cib2
Psmg1	0.164556	0.340255	0.175699	Psmg1
Vps72	0.230258	0.405642	0.175384	Vps72
Zfp74	0.047096	0.222357	0.17526	Zfp74
Dnajc15	0.487136	0.662247	0.175111	Dnajc15
Cyth2	0.514268	0.689311	0.175043	Cyth2
Nt5c	0.343732	0.518702	0.174969	Nt5c
Klc1	0.359031	0.53395	0.17492	Klc1
B230334C09Rik	0	0.174916	0.174916	B230334C09Rik
Rab23	0.0850737	0.259966	0.174892	Rab23
Ubxn6	0.449007	0.623899	0.174892	Ubxn6
Zfp740	0.183588	0.358335	0.174747	Zfp740
Snx19	0.105999	0.280368	0.174369	Snx19
Kcne1l	0.167656	0.341985	0.174329	Kcne1l
Timm8a1	0.28853	0.462733	0.174202	Timm8a1
Rpf2	0.209315	0.383458	0.174143	Rpf2
Psmd13	0.650542	0.824633	0.174091	Psmd13
Brix1	0.210009	0.383943	0.173934	Brix1
Gm9803	0.405882	0.579595	0.173713	Gm9803
Rnf138	0.26547	0.439121	0.173651	Rnf138
Bag3	0.0576374	0.231133	0.173496	Bag3
Psmd8	0.682173	0.855419	0.173246	Psmd8
Slc39a11	0.119071	0.291909	0.172838	Slc39a11
Capn2	0.792051	0.964827	0.172776	Capn2
St8sia5	0.120965	0.293514	0.172549	St8sia5
1810058I24Rik	0.579641	0.752089	0.172448	1810058I24Rik
Pcid2	0.0574476	0.229723	0.172275	Pcid2
Cops4	0.583199	0.755474	0.172275	Cops4
Snrnp35	0.0073698	0.179557	0.172187	Snrnp35
Gnai1	0.00609081	0.178156	0.172065	Gnai1
Sumf2	0.26105	0.432656	0.171606	Sumf2
Mta2	0.116633	0.288228	0.171595	Mta2
Cluh	0.267281	0.438714	0.171433	Cluh
Oma1	0.124358	0.29571	0.171352	Oma1
Foxo1	0.23564	0.406905	0.171266	Foxo1
Spsb4	0.206519	0.377687	0.171168	Spsb4
Cdk5r2	0	0.17109	0.17109	Cdk5r2
Ipo13	0.162103	0.333127	0.171024	Ipo13
Scn8a	0.0538448	0.224823	0.170978	Scn8a
Tmem141	0.277338	0.448223	0.170884	Tmem141
Lsm7	0.569155	0.739986	0.170831	Lsm7
Tmem205	0.846999	1.01771	0.170716	Tmem205
Aph1a	0.467845	0.638552	0.170707	Aph1a
Ndrg3	0.488323	0.658975	0.170652	Ndrg3
Gm17750	0.2048	0.375237	0.170437	Gm17750
Limd1	0.113897	0.284288	0.17039	Limd1
Taco1os	0.0429767	0.213294	0.170317	Taco1os
Acbd3	0.0587985	0.229047	0.170249	Acbd3
Triap1	0.136898	0.307119	0.170221	Triap1
Npdc1	0.905558	1.07575	0.170191	Npdc1
Glrx5	0.528341	0.698501	0.17016	Glrx5
Hccs	0.246385	0.416446	0.170061	Hccs
Taf6l	0.421285	0.591231	0.169946	Taf6l
Gm29508	0.064324	0.234221	0.169897	Gm29508
Fjx1	1.86368	2.03356	0.169881	Fjx1
Unc45a	0.0706931	0.240543	0.16985	Unc45a
Atg13	0.0631767	0.232909	0.169732	Atg13
Cds2	0.33722	0.506872	0.169652	Cds2
Ptcd2	0.132229	0.301799	0.16957	Ptcd2
Cotl1	0.767999	0.937444	0.169445	Cotl1
Dnaic2	0.0184818	0.187866	0.169384	Dnaic2
Nudt22	0.137748	0.307013	0.169265	Nudt22
Lage3	0.52399	0.69325	0.16926	Lage3
Cdkn2d	0.161452	0.330656	0.169204	Cdkn2d
Calcoco1	0.0580536	0.227115	0.169062	Calcoco1
Slc9a6	0.0837356	0.252778	0.169043	Slc9a6
Epn1	0.354456	0.523177	0.168721	Epn1
Zfp467	0.405061	0.573762	0.168701	Zfp467
Ccdc115	0.251337	0.420022	0.168685	Ccdc115
Usp51	0.0527924	0.221417	0.168625	Usp51
Sap30	0.0822791	0.25088	0.168601	Sap30
Oxa1l	0.423432	0.591788	0.168356	Oxa1l
Tomm7	1.2453	1.41354	0.168242	Tomm7
Ppp2r2b	0.820057	0.988174	0.168116	Ppp2r2b
Add1	0.367883	0.535939	0.168056	Add1
Cav2	0.55221	0.720212	0.168002	Cav2
Hs2st1	0.157244	0.325219	0.167974	Hs2st1
Akt1	0.0752281	0.243153	0.167925	Akt1
Zfp931	0.262784	0.430626	0.167841	Zfp931
Acads	0.440088	0.607629	0.167541	Acads
Mtpap	0.111575	0.278937	0.167362	Mtpap
Cherp	0.142373	0.309696	0.167324	Cherp
Acot2	0.293962	0.4612	0.167238	Acot2
Nabp2	0.532466	0.699613	0.167147	Nabp2
Mgat1	0.274646	0.441593	0.166947	Mgat1
Adam9	0.0957899	0.262631	0.166841	Adam9
Fech	0.114976	0.281595	0.166619	Fech
Cpne2	0.584533	0.751066	0.166534	Cpne2
Mroh7	0.0183834	0.184839	0.166456	Mroh7
Surf2	0.135969	0.302383	0.166414	Surf2
Ndufb2	1.40354	1.5699	0.166362	Ndufb2
Smim14	0.678146	0.844391	0.166245	Smim14
Tmem267	0.032302	0.198512	0.16621	Tmem267
Dlg4	0.308941	0.475035	0.166094	Dlg4
Tpbg	0.0315837	0.197621	0.166037	Tpbg
Akr1e1	0.323076	0.488971	0.165894	Akr1e1
Yeats4	0.249605	0.415449	0.165844	Yeats4
Slc25a26	0.134121	0.299776	0.165655	Slc25a26
Mtrr	0	0.165442	0.165442	Mtrr
Sardh	0.209738	0.37517	0.165432	Sardh
Zranb1	0.142802	0.308157	0.165355	Zranb1
Ankrd66	0.0146802	0.179919	0.165239	Ankrd66
Eif2s2	0.993522	1.15869	0.165165	Eif2s2
Car2	2.33348	2.49863	0.16515	Car2
Atf5	0.129498	0.29463	0.165133	Atf5
Cdk5r1	0.0662127	0.23132	0.165108	Cdk5r1
Atxn7l2	0.0457429	0.210786	0.165043	Atxn7l2
Gm8186	0.337087	0.502105	0.165018	Gm8186
Hax1	0.238294	0.40304	0.164746	Hax1
Casd1	0.109142	0.273844	0.164703	Casd1
Flii	0.343487	0.508186	0.164699	Flii
Washc3	0.438777	0.603435	0.164658	Washc3
Ggnbp2	0.468072	0.632522	0.16445	Ggnbp2
Sacm1l	0.256169	0.420604	0.164435	Sacm1l
Ttc7b	0.00617997	0.170613	0.164433	Ttc7b
Dnlz	0.381367	0.545774	0.164407	Dnlz
2310061I04Rik	0.316699	0.481062	0.164362	2310061I04Rik
Akr1a1	0.839767	1.00411	0.164344	Akr1a1
Cdc23	0.172374	0.336637	0.164263	Cdc23
1110004F10Rik	0.904659	1.06881	0.164155	1110004F10Rik
Trap1	0.372554	0.536693	0.164139	Trap1
Sdhd	0.55525	0.719134	0.163883	Sdhd
Mrpl36	0.555187	0.718979	0.163792	Mrpl36
Mvk	0.296291	0.460024	0.163733	Mvk
Sub1	1.44041	1.60409	0.163677	Sub1
H2afz	1.05651	1.22011	0.163602	H2afz
Ypel5	0.164996	0.328563	0.163568	Ypel5
Arf5	1.10588	1.26942	0.163541	Arf5
Npc2	1.36672	1.53011	0.16339	Npc2
Rps10	1.36072	1.52402	0.163307	Rps10
Nat8f6	0.0339986	0.197285	0.163286	Nat8f6
Smim26	0.440505	0.603751	0.163246	Smim26
Polr2d	0.307556	0.470719	0.163163	Polr2d
Dnajb2	0.369243	0.532374	0.163131	Dnajb2
Scn1b	0.100649	0.263767	0.163118	Scn1b
Mrpl33	0.579506	0.742573	0.163066	Mrpl33
Auh	0.213095	0.376161	0.163066	Auh
Rnd3	0.116725	0.279682	0.162957	Rnd3
Zfp64	0.0588291	0.221742	0.162913	Zfp64
Lurap1	0.0288704	0.191496	0.162626	Lurap1
Xpa	0.210084	0.372705	0.162621	Xpa
Fxn	0.198561	0.360882	0.16232	Fxn
Eif4a1	1.26064	1.42291	0.162273	Eif4a1
Trappc5	0.315296	0.477499	0.162203	Trappc5
Rab2a	1.14353	1.3056	0.162072	Rab2a
Rfng	0.277407	0.439243	0.161836	Rfng
Cryzl2	0.457135	0.618849	0.161714	Cryzl2
Stk40	0.077035	0.238735	0.1617	Stk40
Stx7	0.57812	0.739592	0.161472	Stx7
Tmem176b	1.28359	1.44504	0.161441	Tmem176b
Mzt1	0.534089	0.695441	0.161353	Mzt1
Vamp8	0.586718	0.748011	0.161293	Vamp8
Srp19	0.464786	0.626053	0.161268	Srp19
As3mt	0.442725	0.603964	0.161239	As3mt
Izumo4	0.309396	0.470376	0.16098	Izumo4
Wdr35	0.0933596	0.254253	0.160894	Wdr35
Dazap2	0.967379	1.1282	0.160816	Dazap2
Polr2m	0.470573	0.631377	0.160803	Polr2m
Mblac2	0.1849	0.345632	0.160731	Mblac2
Calr	1.04862	1.20934	0.160725	Calr
Rrp8	0.0715464	0.232159	0.160612	Rrp8
Mex3c	0.0644137	0.224989	0.160575	Mex3c
Mrpl52	0.814548	0.975062	0.160514	Mrpl52
Ndufaf3	0.311023	0.471511	0.160488	Ndufaf3
Morf4l2	0.465371	0.625734	0.160363	Morf4l2
Dhrs4	0.398286	0.558647	0.160361	Dhrs4
Lactb2	0.128166	0.288486	0.16032	Lactb2
Abhd5	0.094851	0.255139	0.160288	Abhd5
Orc6	0.277823	0.43806	0.160237	Orc6
Eva1a	1.2043	1.36437	0.160068	Eva1a
Fbxw8	0.104142	0.264132	0.15999	Fbxw8
Rnf180	0.151533	0.311507	0.159973	Rnf180
Eny2	0.522643	0.682353	0.159711	Eny2
Anapc11	0.770158	0.92978	0.159622	Anapc11
Zfp385a	0.180424	0.339969	0.159544	Zfp385a
Fbln1	0.207091	0.366564	0.159473	Fbln1
Fam69c	0.39706	0.556391	0.159332	Fam69c
Foxg1	0.306899	0.466197	0.159299	Foxg1
Cdc16	0.166319	0.325356	0.159037	Cdc16
Paics	0.701016	0.860027	0.15901	Paics
B9d1	0.243955	0.402819	0.158864	B9d1
Cyp2d22	0.617086	0.775911	0.158824	Cyp2d22
Capzb	0.764818	0.923322	0.158504	Capzb
Mkrn1	0.274754	0.433108	0.158354	Mkrn1
Cldn11	0.166675	0.324951	0.158276	Cldn11
Suds3	0.258584	0.41679	0.158205	Suds3
Commd4	0.63158	0.789645	0.158065	Commd4
Crip2	1.37522	1.53311	0.157885	Crip2
Kdm6b	0.157199	0.314924	0.157725	Kdm6b
Acaa2	1.1212	1.27887	0.157662	Acaa2
Washc5	0.0278	0.185446	0.157645	Washc5
Ddah2	0.467013	0.624596	0.157583	Ddah2
Shd	0.11804	0.275501	0.157461	Shd
Ankrd13a	0.0432761	0.200713	0.157437	Ankrd13a
Appl1	0.273545	0.430981	0.157436	Appl1
Mag	0.27405	0.43132	0.15727	Mag
Utp23	0.11421	0.271322	0.157111	Utp23
Nceh1	0.113831	0.270588	0.156758	Nceh1
Memo1	0.103206	0.259945	0.15674	Memo1
Emc4	0.767175	0.923914	0.156739	Emc4
Setd7	0.183915	0.340611	0.156696	Setd7
Rps2	1.57901	1.7356	0.156593	Rps2
Mtfr1	0.0685981	0.225027	0.156429	Mtfr1
Wnk2	0.193953	0.35035	0.156397	Wnk2
Fam234a	0.253656	0.409797	0.156141	Fam234a
Pcca	0.31499	0.471097	0.156107	Pcca
Psmg3	0.16083	0.316885	0.156055	Psmg3
Exosc2	0.0992912	0.255153	0.155862	Exosc2
Ube2z	0.00619993	0.162056	0.155856	Ube2z
Slc25a39	0.163835	0.319624	0.155789	Slc25a39
Zcchc10	0.133993	0.289721	0.155728	Zcchc10
Nat9	0.09905	0.254743	0.155693	Nat9
Zmat1	0.0898464	0.245261	0.155415	Zmat1
Lamp5	0.00637796	0.16155	0.155172	Lamp5
Usp38	0.0853128	0.240385	0.155073	Usp38
Cdh19	0.0940904	0.249133	0.155043	Cdh19
Fxr1	0.315587	0.470611	0.155024	Fxr1
Pdcd6	0.912812	1.06774	0.15493	Pdcd6
Tmem63a	0.0269506	0.181856	0.154905	Tmem63a
mt-Nd2	3.2153	3.37011	0.154808	mt-Nd2
Mtg2	0.233666	0.388355	0.154689	Mtg2
St13	0.916565	1.07116	0.154595	St13
Cnbp	1.544	1.69852	0.15452	Cnbp
Vps35	0.682845	0.837186	0.154342	Vps35
Glmp	1.02449	1.17879	0.154294	Glmp
Zfand5	0.809818	0.963976	0.154157	Zfand5
Rp9	0.345587	0.499675	0.154089	Rp9
Vkorc1	0.46111	0.615127	0.154016	Vkorc1
Arhgef2	0.0523527	0.206308	0.153955	Arhgef2
B230118H07Rik	0.623183	0.776973	0.153789	B230118H07Rik
Cfl2	0.68505	0.838805	0.153755	Cfl2
Prnp	2.79456	2.94824	0.153683	Prnp
Otub1	0.469692	0.623303	0.153611	Otub1
Gas6	0.585382	0.738706	0.153323	Gas6
Vmac	0.0824591	0.23577	0.153311	Vmac
Slc6a8	0.118913	0.27216	0.153247	Slc6a8
Cks1b	0.102169	0.255389	0.153221	Cks1b
Trappc2	0.520783	0.673949	0.153166	Trappc2
Cdk4	0.642599	0.795749	0.153151	Cdk4
Snph	0.1112	0.264349	0.153149	Snph
4933431E20Rik	0.50393	0.656982	0.153052	4933431E20Rik
Med22	0.293927	0.446959	0.153033	Med22
Hnrnpul1	0.221111	0.373614	0.152503	Hnrnpul1
Chmp7	0.242766	0.395119	0.152353	Chmp7
Wdr37	0.101271	0.25361	0.152339	Wdr37
Prdx3	0.616348	0.768556	0.152208	Prdx3
Commd5	0	0.152169	0.152169	Commd5
Upp1	0.138245	0.290381	0.152136	Upp1
Syn2	0.38286	0.534803	0.151943	Syn2
BC029722	0.284779	0.436561	0.151783	BC029722
Ubap2	0.0422259	0.194	0.151774	Ubap2
Cct2	0.662896	0.814562	0.151666	Cct2
Pou2f1	0.312395	0.463803	0.151408	Pou2f1
Uqcrc2	1.24943	1.40083	0.1514	Uqcrc2
Exosc7	0.320262	0.471545	0.151284	Exosc7
Ywhaz	0.389269	0.540543	0.151274	Ywhaz
Fdxr	0.175557	0.326742	0.151186	Fdxr
Pon2	1.44883	1.60001	0.151178	Pon2
Pxmp2	0.517178	0.668339	0.151161	Pxmp2
Sox10	0.231028	0.382168	0.15114	Sox10
Prmt7	0.21084	0.361977	0.151137	Prmt7
Tiprl	0.482566	0.633686	0.15112	Tiprl
2310039H08Rik	0.127153	0.278239	0.151087	2310039H08Rik
Psmg2	0.404816	0.555902	0.151085	Psmg2
Junb	0.169221	0.320303	0.151082	Junb
Znhit6	0.110258	0.261311	0.151053	Znhit6
Prkar2a	0.176232	0.327188	0.150956	Prkar2a
Ppp1cb	0.636827	0.787779	0.150952	Ppp1cb
Spred2	0.0566699	0.207458	0.150788	Spred2
Cflar	0.304453	0.455174	0.150721	Cflar
Hilpda	0.021632	0.172349	0.150717	Hilpda
Zmynd8	0.286475	0.437126	0.150651	Zmynd8
Bzw1	0.54178	0.692391	0.150611	Bzw1
Plscr3	0.0716321	0.222229	0.150597	Plscr3
Tm7sf2	0.287835	0.438159	0.150325	Tm7sf2
Gramd3	0.589044	0.739337	0.150293	Gramd3
Clptm1	0.688834	0.839108	0.150275	Clptm1
Usp20	0.0854216	0.235631	0.15021	Usp20
Eif3h	0.922735	1.07291	0.150178	Eif3h
Rpl36a-ps1	0.336481	0.48662	0.150138	Rpl36a-ps1
Ttc9b	0.0587859	0.208883	0.150097	Ttc9b
Diablo	0.401156	0.551247	0.150091	Diablo
Maneal	0.0197776	0.169759	0.149981	Maneal
Rbbp7	0.496757	0.646663	0.149906	Rbbp7
Abca5	0.183341	0.333182	0.14984	Abca5
Manba	0.0488068	0.198509	0.149703	Manba
Tmem59	2.05148	2.20098	0.149501	Tmem59
Fam20c	0.210415	0.359825	0.14941	Fam20c
Agpat5	1.3937	1.54303	0.149331	Agpat5
Meaf6	0.231475	0.38068	0.149206	Meaf6
Eif2b5	0.175117	0.324185	0.149068	Eif2b5
Mrpl18	0.52939	0.678422	0.149032	Mrpl18
Sin3b	0.602067	0.751063	0.148996	Sin3b
Clns1a	0.469845	0.618777	0.148932	Clns1a
Six3	0.141084	0.289977	0.148893	Six3
Habp4	0.0484253	0.197201	0.148776	Habp4
Trappc13	0.384777	0.53352	0.148743	Trappc13
Ppih	0.0880918	0.236834	0.148742	Ppih
Gmpr2	0.411596	0.560331	0.148736	Gmpr2
Pef1	0.296026	0.44465	0.148625	Pef1
Ephb1	0.0959546	0.244412	0.148457	Ephb1
Trmt112	0.648272	0.796657	0.148386	Trmt112
Acot1	0.672619	0.820917	0.148298	Acot1
Actr10	0.601664	0.7499	0.148236	Actr10
Atp6v1b2	0.444252	0.592475	0.148223	Atp6v1b2
Coq5	0.363914	0.512097	0.148184	Coq5
Ccdc32	0.151999	0.300127	0.148127	Ccdc32
Gnaz	0.0435579	0.191672	0.148114	Gnaz
Atf2	0.179714	0.327729	0.148015	Atf2
Paqr7	1.11875	1.26642	0.147668	Paqr7
Sumo3	0.338477	0.486076	0.147599	Sumo3
Adamts4	0	0.147441	0.147441	Adamts4
Saraf	1.83526	1.9827	0.147439	Saraf
Plp1	1.11522	1.26266	0.147437	Plp1
Znhit2	0.0910859	0.238504	0.147418	Znhit2
Abcf2	0.160565	0.307957	0.147392	Abcf2
Fbxl18	0.0356946	0.183055	0.14736	Fbxl18
Ccs	0.440907	0.588247	0.14734	Ccs
Cuta	1.09792	1.2452	0.147285	Cuta
Ythdf1	0.0842877	0.231283	0.146995	Ythdf1
Cdc26	0.377174	0.52413	0.146955	Cdc26
Jagn1	0.533451	0.680323	0.146873	Jagn1
Med28	0.634672	0.781543	0.146871	Med28
Clasp2	0.685131	0.831835	0.146704	Clasp2
Ip6k1	0.448229	0.594929	0.1467	Ip6k1
Isoc2b	0.231203	0.377852	0.14665	Isoc2b
Tnpo2	0.035092	0.181732	0.14664	Tnpo2
Fam19a5	0.176618	0.323214	0.146597	Fam19a5
Rab30	0.160396	0.306913	0.146517	Rab30
Rnf122	0.0496294	0.196087	0.146458	Rnf122
Mapkap1	0.277682	0.42409	0.146408	Mapkap1
Emc7	1.39729	1.54357	0.146272	Emc7
Tmed10	1.52658	1.67283	0.14625	Tmed10
Rnf208	0.0142925	0.160524	0.146232	Rnf208
Clk3	0.290094	0.436154	0.14606	Clk3
Pacsin1	0.0521534	0.198164	0.146011	Pacsin1
Rabep2	0.0987798	0.244654	0.145875	Rabep2
Tarbp2	0.157579	0.303432	0.145852	Tarbp2
Hexim2	0.0313432	0.17697	0.145627	Hexim2
Rpl41	2.50918	2.65465	0.145471	Rpl41
Fcf1	0.310017	0.455441	0.145424	Fcf1
Atg101	0.222076	0.367325	0.145249	Atg101
Paxx	0.484904	0.630152	0.145248	Paxx
Lrfn1	0	0.145041	0.145041	Lrfn1
Plin3	0.535591	0.680549	0.144958	Plin3
Tmem242	0.396241	0.541054	0.144813	Tmem242
Ost4	0.863102	1.00785	0.144746	Ost4
Gm10076	0.266031	0.410591	0.14456	Gm10076
Casc3	0.144978	0.289477	0.1445	Casc3
Uqcr10	1.91966	2.06414	0.144483	Uqcr10
Bivm	0.0372053	0.181665	0.144459	Bivm
Fam13c	0.46655	0.61094	0.14439	Fam13c
Gnas	1.80672	1.95098	0.14426	Gnas
Mettl21a	0.191543	0.335786	0.144243	Mettl21a
Pla2g16	0.950623	1.09475	0.144126	Pla2g16
Ttll12	0.0606924	0.204625	0.143933	Ttll12
Pithd1	0.291656	0.435516	0.14386	Pithd1
Ints3	0.0650693	0.208833	0.143764	Ints3
Rab31	0.379838	0.523563	0.143725	Rab31
Sc5d	0.591883	0.735559	0.143676	Sc5d
Nxpe4	0.0336615	0.177181	0.143519	Nxpe4
Dnajc30	0.275403	0.418838	0.143435	Dnajc30
Psmb6	1.35536	1.49878	0.143421	Psmb6
Rsl1d1	0.486004	0.629316	0.143312	Rsl1d1
Kcnc3	0.0170078	0.160291	0.143283	Kcnc3
Cplx2	0.258151	0.401421	0.143271	Cplx2
Mfap1b	0.150008	0.293246	0.143238	Mfap1b
Mrm3	0.0860101	0.229241	0.143231	Mrm3
Kctd13	0.221879	0.365098	0.143219	Kctd13
Slc9a9	0.0224733	0.165442	0.142968	Slc9a9
Ube2l3	0.808264	0.951121	0.142857	Ube2l3
Nop10	0.857193	1.00004	0.142847	Nop10
Cldn12	0.102867	0.245572	0.142705	Cldn12
Ncs1	0.188607	0.331305	0.142698	Ncs1
Eral1	0.0987724	0.241441	0.142669	Eral1
Rpe65	0.232216	0.374827	0.142612	Rpe65
Mettl15	0.101319	0.243719	0.142399	Mettl15
Hadhb	1.46914	1.61135	0.142212	Hadhb
Psmc6	0.822519	0.964651	0.142132	Psmc6
Hsd17b10	0.669977	0.811917	0.14194	Hsd17b10
Gmppa	0.091882	0.233732	0.14185	Gmppa
Bhlhe40	0.759904	0.90169	0.141785	Bhlhe40
Tctex1d2	0.141886	0.283599	0.141713	Tctex1d2
Dcun1d2	0.0912386	0.232836	0.141597	Dcun1d2
Camk2a	0.0593306	0.200803	0.141473	Camk2a
Ankrd27	0.071903	0.213283	0.14138	Ankrd27
Rhbdd1	0.0309937	0.172345	0.141351	Rhbdd1
Ftl1-ps1	0.169751	0.311085	0.141334	Ftl1-ps1
Prss50	0.142401	0.283722	0.14132	Prss50
Eif3d	0.369416	0.510281	0.140865	Eif3d
Gcc1	0.0133921	0.154257	0.140865	Gcc1
Numbl	0.0277237	0.16855	0.140826	Numbl
Rfk	0.206691	0.347496	0.140806	Rfk
Mmaa	0.220619	0.361362	0.140742	Mmaa
Znrd1as	0.0324875	0.173152	0.140664	Znrd1as
Nptxr	0.0237749	0.164386	0.140611	Nptxr
Stxbp1	0.0472942	0.187669	0.140375	Stxbp1
Kxd1	0.455513	0.595809	0.140296	Kxd1
Smim10l1	0.664176	0.80445	0.140274	Smim10l1
Hace1	0	0.140247	0.140247	Hace1
Pgghg	0.0767396	0.216968	0.140229	Pgghg
1700021F05Rik	0.315783	0.45597	0.140187	1700021F05Rik
Pmpca	0.211578	0.351747	0.140169	Pmpca
Rab18	0.995428	1.13554	0.140108	Rab18
Snrnp40	0.287307	0.427221	0.139914	Snrnp40
Cav1	0	0.139869	0.139869	Cav1
Pgls	0.755493	0.89535	0.139857	Pgls
Hnrnpm	0.402509	0.542297	0.139788	Hnrnpm
Trim28	0.215999	0.35578	0.13978	Trim28
Ick	0.0812082	0.220879	0.139671	Ick
Ttl	0.0106871	0.150201	0.139514	Ttl
Mocos	0.00617997	0.145692	0.139512	Mocos
Haghl	0.856561	0.995896	0.139334	Haghl
Ino80d	0.334073	0.473239	0.139166	Ino80d
Meis2	0.442089	0.581101	0.139012	Meis2
Itgb5	0.31808	0.45704	0.13896	Itgb5
Wdr11	0.00437298	0.143308	0.138935	Wdr11
Pex11b	0.208056	0.346898	0.138841	Pex11b
Ncaph2	0.289101	0.427941	0.138839	Ncaph2
Dagla	0.013365	0.152202	0.138837	Dagla
Xiap	0.236628	0.375458	0.138829	Xiap
Coq8a	0.0706246	0.209385	0.138761	Coq8a
Ube2g2	0.151316	0.290007	0.138691	Ube2g2
Omg	0.845163	0.983697	0.138534	Omg
Gm20383	0.0612418	0.199748	0.138506	Gm20383
Gpc5	1.15861	1.29704	0.138428	Gpc5
Rbmxl1	0.467668	0.606064	0.138396	Rbmxl1
Mocs3	0.0250688	0.163464	0.138395	Mocs3
Rpl6	1.77562	1.91381	0.138185	Rpl6
Emc6	0.844285	0.982423	0.138138	Emc6
Shkbp1	0.0745253	0.212606	0.13808	Shkbp1
Fam98c	0.21551	0.353588	0.138078	Fam98c
Ttc3	0.822879	0.960951	0.138073	Ttc3
Acbd6	0.41433	0.552274	0.137943	Acbd6
Pam16	0.0539635	0.191649	0.137685	Pam16
Gm14419	0.0979585	0.235637	0.137679	Gm14419
Psmb2	1.16781	1.30544	0.137632	Psmb2
Nup153	0.063724	0.201326	0.137602	Nup153
Gpx4	2.04758	2.18508	0.137498	Gpx4
Rraga	0.782513	0.919978	0.137465	Rraga
Ppt2	0.391293	0.528698	0.137405	Ppt2
Zcchc14	0.076234	0.21362	0.137387	Zcchc14
Adprh	0.716465	0.853787	0.137322	Adprh
Rps9	1.84401	1.98129	0.137281	Rps9
Aco2	1.15102	1.28826	0.137239	Aco2
Rpl10	0.544052	0.681249	0.137197	Rpl10
Eif3m	0.614832	0.751989	0.137157	Eif3m
Etfb	1.39771	1.53486	0.137146	Etfb
Map1a	0.305606	0.442743	0.137138	Map1a
Gatad1	0.426985	0.564122	0.137137	Gatad1
Creg2	0.0424582	0.179583	0.137125	Creg2
Prrt1	0.167831	0.304905	0.137073	Prrt1
Supt3	0.14012	0.277184	0.137064	Supt3
Ier2	0.0878921	0.224713	0.136821	Ier2
Zfp784	0.0140368	0.150775	0.136738	Zfp784
Rhno1	0.057622	0.194319	0.136697	Rhno1
Tm9sf4	0.424639	0.561307	0.136667	Tm9sf4
Dtwd1	0.0340032	0.170641	0.136638	Dtwd1
Cox6b2	0.318656	0.455221	0.136565	Cox6b2
Tsc22d3	1.05898	1.19549	0.136519	Tsc22d3
Wdr43	0.183231	0.319678	0.136447	Wdr43
Psmb10	0.425783	0.562226	0.136443	Psmb10
Oxsr1	0.0366217	0.172945	0.136324	Oxsr1
Serp2	0.106166	0.242458	0.136292	Serp2
Atxn7l3	0.0344264	0.17071	0.136283	Atxn7l3
Ggnbp1	0.362403	0.498684	0.13628	Ggnbp1
Tmem94	0.0912497	0.227404	0.136154	Tmem94
Imp3	0.426812	0.562914	0.136102	Imp3
Pycr2	0.341367	0.477429	0.136062	Pycr2
Wscd2	0	0.136042	0.136042	Wscd2
Tmem144	0.102691	0.238723	0.136032	Tmem144
Tmem200c	0.091021	0.22703	0.136009	Tmem200c
Polr2k	0.60904	0.744954	0.135914	Polr2k
Commd1	0.534875	0.670671	0.135795	Commd1
Smad5	0.118784	0.254404	0.135621	Smad5
Sec11c	1.02847	1.16408	0.135617	Sec11c
Sst	0	0.135606	0.135606	Sst
Pdlim7	0.0643448	0.199927	0.135582	Pdlim7
Mrpl39	0.293632	0.429183	0.135551	Mrpl39
Tinf2	0.12208	0.257439	0.135358	Tinf2
Thop1	0.184343	0.319697	0.135354	Thop1
Sigmar1	0.384565	0.519807	0.135242	Sigmar1
Txnl4a	0.383551	0.518474	0.134923	Txnl4a
Ngef	1.0143	1.14906	0.134762	Ngef
Foxo3	0.0251098	0.159847	0.134738	Foxo3
1810021B22Rik	0.0422847	0.176982	0.134698	1810021B22Rik
Bcl7c	0.239624	0.374299	0.134675	Bcl7c
Bnip3l	0.768036	0.902673	0.134636	Bnip3l
Trim62	0.127984	0.262557	0.134573	Trim62
Ccdc25	0.144169	0.278711	0.134542	Ccdc25
Gli2	0.073294	0.20776	0.134466	Gli2
Ppa1	0.472749	0.606871	0.134122	Ppa1
Wiz	0.0387113	0.172806	0.134095	Wiz
Grin1	0	0.134031	0.134031	Grin1
Saal1	0.0482173	0.182246	0.134029	Saal1
Homer3	0.194927	0.328661	0.133734	Homer3
Nsmf	0.396452	0.52994	0.133488	Nsmf
Tspan17	0.0868241	0.220282	0.133458	Tspan17
Ninj1	0.265238	0.398693	0.133455	Ninj1
Mrps18a	0.686398	0.819845	0.133447	Mrps18a
Ip6k3	0.0384897	0.171897	0.133407	Ip6k3
Zfp251	0.0809962	0.214323	0.133326	Zfp251
Mrfap1	1.00984	1.14314	0.1333	Mrfap1
Bace1	0.16527	0.298533	0.133263	Bace1
Gps2	0.244484	0.377692	0.133208	Gps2
Fam45a	0.26296	0.396074	0.133114	Fam45a
Phactr3	0.898892	1.03196	0.133073	Phactr3
Stat1	0.0354044	0.168432	0.133028	Stat1
Ctdsp1	0.347055	0.480038	0.132983	Ctdsp1
Gale	0.084633	0.21754	0.132907	Gale
Coa7	0.021345	0.154228	0.132883	Coa7
Timm10b	0.493366	0.626155	0.132789	Timm10b
Rap1gds1	0.179518	0.312307	0.132788	Rap1gds1
Syp	0.0910349	0.223681	0.132646	Syp
Cox16	0.0321484	0.164664	0.132516	Cox16
Mrps23	0.359183	0.491688	0.132506	Mrps23
Serpini1	0.146432	0.278907	0.132475	Serpini1
Sh3bp5l	0.0343752	0.166786	0.132411	Sh3bp5l
Ccnd1	0.0736401	0.205992	0.132352	Ccnd1
Sirt6	0.0695423	0.201879	0.132337	Sirt6
Parp2	0.215991	0.348241	0.132249	Parp2
Bad	0.447296	0.579515	0.132219	Bad
Gem	0.00831603	0.140499	0.132182	Gem
Dstn	0.993143	1.1253	0.132155	Dstn
Ebag9	0.139725	0.271786	0.132062	Ebag9
Drap1	0.527281	0.659339	0.132059	Drap1
Slc8b1	0.506421	0.638402	0.131981	Slc8b1
Ino80b	0.182428	0.314386	0.131958	Ino80b
Mkrn2	0.0915138	0.223269	0.131755	Mkrn2
Ttc23	0.096699	0.228365	0.131666	Ttc23
Stk32c	0	0.131482	0.131482	Stk32c
Fbxl19	0.0136511	0.145109	0.131458	Fbxl19
Ssbp4	0.440889	0.572339	0.13145	Ssbp4
Alg12	0.0622796	0.193673	0.131394	Alg12
Zfp703	0.115962	0.24727	0.131308	Zfp703
Wdr36	0.0619586	0.193228	0.131269	Wdr36
Homer2	0.0897095	0.220961	0.131251	Homer2
Smyd3	0.0381623	0.16938	0.131217	Smyd3
Abhd14b	0.685262	0.81643	0.131167	Abhd14b
Usp39	0.051774	0.182909	0.131135	Usp39
Ubl5	1.30576	1.43688	0.131121	Ubl5
Ran	1.03859	1.16962	0.131021	Ran
Ccdc157	0.101271	0.232222	0.130951	Ccdc157
Kcnj8	0	0.13092	0.13092	Kcnj8
Mmd	0.177692	0.308567	0.130875	Mmd
Mus81	0.272355	0.403042	0.130687	Mus81
Coq7	0.526241	0.656728	0.130487	Coq7
AI849053	0.0690026	0.199362	0.130359	AI849053
Btbd9	0.183641	0.313993	0.130353	Btbd9
Cnn3	1.5118	1.64214	0.13034	Cnn3
Lap3	1.20542	1.3356	0.130182	Lap3
Tamm41	0.0549031	0.184968	0.130065	Tamm41
Pfn1	1.33691	1.4669	0.129991	Pfn1
Adat2	0	0.129929	0.129929	Adat2
Fancl	0.0613522	0.191241	0.129889	Fancl
Dld	0.47208	0.601698	0.129618	Dld
Polr2l	0.29414	0.423754	0.129614	Polr2l
Nle1	0.0648907	0.194356	0.129466	Nle1
Fam174a	0.495116	0.624429	0.129313	Fam174a
Erp29	0.788418	0.917711	0.129293	Erp29
Vegfa	0.457654	0.586929	0.129275	Vegfa
Maged2	0.542425	0.671603	0.129178	Maged2
Arpc1b	0.204983	0.334155	0.129172	Arpc1b
Rbm14	0.153497	0.282571	0.129074	Rbm14
H2-Ke6	0.529651	0.658696	0.129045	H2-Ke6
Galk1	0.387117	0.516042	0.128925	Galk1
Fbxo5	0.0575597	0.186342	0.128782	Fbxo5
Cops8	0.448763	0.577533	0.128771	Cops8
Dctn4	0.59092	0.719641	0.128721	Dctn4
Celsr2	0.218301	0.346998	0.128697	Celsr2
Tubb2b	2.53137	2.66	0.128629	Tubb2b
Cyp4f15	0.763244	0.891767	0.128523	Cyp4f15
Mrps33	1.44553	1.57401	0.128479	Mrps33
Rab35	0.261237	0.389637	0.1284	Rab35
Thap7	0.234225	0.362611	0.128386	Thap7
Fam172a	0.635239	0.763602	0.128363	Fam172a
Dgat2	0.043526	0.171607	0.128081	Dgat2
Gm12326	0.0273092	0.155354	0.128045	Gm12326
Brms1	0.0801466	0.208167	0.12802	Brms1
P3h3	0.153806	0.281788	0.127983	P3h3
Mrpl20	0.748253	0.876146	0.127894	Mrpl20
Dpagt1	0.129075	0.256963	0.127889	Dpagt1
Tubb5	0.747124	0.874958	0.127834	Tubb5
Nit1	0.323006	0.450828	0.127822	Nit1
Rnf113a2	0.192623	0.320326	0.127703	Rnf113a2
Gm16286	0.275834	0.403419	0.127585	Gm16286
Cryl1	0.0317067	0.159184	0.127478	Cryl1
Phlda3	0.144599	0.272076	0.127477	Phlda3
Dnajc4	0.199843	0.327024	0.127181	Dnajc4
Gng13	0.225947	0.353063	0.127116	Gng13
Cdk17	0.158951	0.286013	0.127062	Cdk17
Gm15972	0.0059591	0.132962	0.127003	Gm15972
Grin2c	0.908421	1.03539	0.126965	Grin2c
Apc2	0.172154	0.299089	0.126935	Apc2
Rilpl2	0.21707	0.343994	0.126924	Rilpl2
Pdcd7	0.0366395	0.163497	0.126857	Pdcd7
Stxbp6	0.157868	0.284662	0.126794	Stxbp6
Vamp7	0.314829	0.441565	0.126735	Vamp7
Fbxw7	0.0648688	0.191596	0.126727	Fbxw7
Csnk1d	0.308992	0.435683	0.126692	Csnk1d
N6amt1	0.157293	0.283878	0.126584	N6amt1
Gm40578	0.236989	0.363507	0.126518	Gm40578
Mpv17l	0.261886	0.388341	0.126455	Mpv17l
Gtf2a2	0.560441	0.686859	0.126418	Gtf2a2
Hivep3	0.211912	0.338269	0.126357	Hivep3
Zfyve21	1.10379	1.23011	0.126328	Zfyve21
Zfand2a	0.0498727	0.176177	0.126305	Zfand2a
Trappc4	0.800942	0.927137	0.126194	Trappc4
Ube4a	0.128241	0.254386	0.126144	Ube4a
Yap1	0.134887	0.26103	0.126143	Yap1
Twf2	0.259316	0.385344	0.126028	Twf2
Senp3	0.0666154	0.192557	0.125942	Senp3
Snx33	0.0448541	0.170673	0.125819	Snx33
Gorasp2	0.333826	0.459595	0.125769	Gorasp2
Psma2	1.26931	1.39503	0.125719	Psma2
Dpp9	0.0720903	0.197708	0.125617	Dpp9
Smdt1	1.63643	1.76201	0.125576	Smdt1
Kti12	0.0988039	0.224244	0.12544	Kti12
Mtif3	0.143992	0.269399	0.125407	Mtif3
Plekho2	0.343421	0.468585	0.125164	Plekho2
Derl1	0.895375	1.02025	0.124875	Derl1
Tmem55b	0.638597	0.76344	0.124843	Tmem55b
Adam15	0.128236	0.253067	0.124831	Adam15
Hars	0.204715	0.329427	0.124712	Hars
Tm6sf1	0	0.124429	0.124429	Tm6sf1
Polr3h	1.24956	1.37398	0.124416	Polr3h
Dph3	0.415718	0.540033	0.124314	Dph3
Xrcc2	0.0319721	0.156257	0.124285	Xrcc2
Klhdc4	0.0804144	0.204626	0.124212	Klhdc4
Ndufa7	1.66935	1.79353	0.124174	Ndufa7
Pigq	0.174798	0.298951	0.124153	Pigq
Slc25a20	0.13965	0.263799	0.124148	Slc25a20
A830082K12Rik	0.419464	0.54335	0.123885	A830082K12Rik
Cox4i2	0.108367	0.23222	0.123853	Cox4i2
A230050P20Rik	0.143338	0.267136	0.123798	A230050P20Rik
Emc8	0.639929	0.76372	0.12379	Emc8
Nrde2	0.0490707	0.172828	0.123757	Nrde2
Ap3s2	0.141971	0.265694	0.123723	Ap3s2
Tceal9	0.437249	0.560968	0.123719	Tceal9
Sdsl	0.278517	0.40217	0.123653	Sdsl
Sfxn5	1.571	1.69456	0.123561	Sfxn5
Npl	0.123744	0.247243	0.123499	Npl
Rgs4	0	0.123491	0.123491	Rgs4
Btf3l4	0.095315	0.21871	0.123395	Btf3l4
Zdhhc7	0.103112	0.22635	0.123238	Zdhhc7
Mettl22	0.225576	0.348778	0.123202	Mettl22
Mast3	0	0.12308	0.12308	Mast3
Lyn	0	0.12308	0.12308	Lyn
Echs1	1.15175	1.27482	0.123073	Echs1
Sugp1	0.124114	0.247159	0.123045	Sugp1
Coq6	0.126228	0.24927	0.123042	Coq6
Zkscan3	0.31774	0.440763	0.123023	Zkscan3
Cebpd	0.262172	0.385171	0.122998	Cebpd
Rwdd2a	0.0583788	0.181327	0.122948	Rwdd2a
Atp6v1g2	0.117096	0.239915	0.122819	Atp6v1g2
Higd1b	0	0.122734	0.122734	Higd1b
Yjefn3	0.0708885	0.193619	0.122731	Yjefn3
Dlgap4	0.251036	0.373583	0.122548	Dlgap4
Ndufa4l2	0	0.122461	0.122461	Ndufa4l2
Jmy	0.132765	0.25521	0.122445	Jmy
Ankrd54	0.194765	0.317176	0.122411	Ankrd54
Golt1b	0.131858	0.254191	0.122333	Golt1b
Tceal1	0.430859	0.55318	0.122321	Tceal1
Slc4a2	0.0743501	0.196669	0.122318	Slc4a2
Coprs	0.379378	0.501602	0.122224	Coprs
Tmem55a	0.636157	0.758288	0.12213	Tmem55a
Htatip2	0.0520128	0.174127	0.122115	Htatip2
Rnf141	0.0839032	0.205827	0.121924	Rnf141
Gpc4	0.0872375	0.209144	0.121907	Gpc4
Kyat1	0.0909992	0.212868	0.121869	Kyat1
Ccdc13	0.0347573	0.156466	0.121709	Ccdc13
Acsf3	0.0659179	0.187388	0.12147	Acsf3
Fbxl6	0.256253	0.377562	0.121309	Fbxl6
Smim7	0.649526	0.77077	0.121244	Smim7
Fezf2	0.246943	0.36809	0.121147	Fezf2
S1pr1	1.74097	1.86209	0.121118	S1pr1
Parn	0.151617	0.272633	0.121016	Parn
Rrp9	0.190073	0.311028	0.120954	Rrp9
Xkr6	0.0184818	0.1394	0.120918	Xkr6
Ints14	0.0825775	0.203316	0.120739	Ints14
Ddit4l	0.230331	0.351051	0.12072	Ddit4l
Fam120b	0.103939	0.224653	0.120714	Fam120b
Trit1	0.0786034	0.199237	0.120633	Trit1
Nop53	0.630591	0.751165	0.120574	Nop53
Iscu	0.971195	1.09176	0.120565	Iscu
Slc25a35	0.0938758	0.21444	0.120564	Slc25a35
Tatdn1	0.249705	0.370144	0.120439	Tatdn1
Srsf3	0.811119	0.931504	0.120385	Srsf3
Prdm5	0.193391	0.313661	0.12027	Prdm5
Trim44	0.0548385	0.175069	0.120231	Trim44
Mipol1	0.118444	0.238648	0.120204	Mipol1
Tmem100	0.927708	1.0477	0.119989	Tmem100
Ppp2r1a	0.953726	1.0737	0.119975	Ppp2r1a
Grsf1	0.0593948	0.17934	0.119946	Grsf1
Fcgrt	0.640218	0.760162	0.119944	Fcgrt
Dtx2	0.00369169	0.123604	0.119912	Dtx2
Mfsd5	0.119751	0.239662	0.11991	Mfsd5
Psenen	1.20899	1.32888	0.119885	Psenen
Brdt	0.0207964	0.140662	0.119865	Brdt
Aga	0.420401	0.54026	0.119859	Aga
Acp2	0.25181	0.371517	0.119707	Acp2
Faap20	0.263789	0.38344	0.119651	Faap20
Ubxn8	0.220786	0.340427	0.119641	Ubxn8
Pgs1	0.085952	0.205331	0.119379	Pgs1
Wdr74	0.112644	0.232017	0.119373	Wdr74
Tlr3	0.69591	0.815248	0.119338	Tlr3
Tlcd1	1.50704	1.62634	0.119298	Tlcd1
Borcs8	0.105875	0.225133	0.119258	Borcs8
Ubald1	0.257604	0.376727	0.119123	Ubald1
Gm39469	0.0539739	0.173035	0.119061	Gm39469
Tmod1	0	0.119054	0.119054	Tmod1
Abca2	0.255187	0.374137	0.11895	Abca2
H2afv	1.15664	1.27553	0.11889	H2afv
Rps5	1.8325	1.95118	0.118677	Rps5
Tyw5	0.200404	0.319064	0.11866	Tyw5
Stx18	0.265078	0.38364	0.118562	Stx18
Tppp	0	0.118556	0.118556	Tppp
Vars	0.379104	0.497585	0.118481	Vars
Prr18	0.0275607	0.146031	0.11847	Prr18
Mtor	0.0991392	0.217428	0.118289	Mtor
Apex1	0.219811	0.338009	0.118198	Apex1
Atl2	0.621614	0.739805	0.11819	Atl2
Cln8	0.184898	0.303017	0.118119	Cln8
Rbm17	0.263991	0.381958	0.117967	Rbm17
Optn	0.0563455	0.174147	0.117801	Optn
Tns2	0.0473717	0.165143	0.117772	Tns2
Vhl	0.298379	0.416122	0.117743	Vhl
Sfr1	0.771173	0.888888	0.117715	Sfr1
Cdyl	0.0438365	0.161289	0.117452	Cdyl
Adam23	0.161936	0.279372	0.117435	Adam23
Utp20	0	0.117419	0.117419	Utp20
Bckdk	0.313446	0.430852	0.117407	Bckdk
Lrrc75a	0	0.117208	0.117208	Lrrc75a
Pdlim4	1.10278	1.21972	0.116949	Pdlim4
Lix1l	0.197198	0.313969	0.116772	Lix1l
Slc25a16	0.188793	0.305537	0.116744	Slc25a16
Pole4	0.560464	0.677194	0.116731	Pole4
4632415L05Rik	0.324078	0.440805	0.116727	4632415L05Rik
Sertad2	0.330616	0.447288	0.116673	Sertad2
Hyal2	0.19566	0.31225	0.11659	Hyal2
Myc	0.0410918	0.157655	0.116563	Myc
Fam162a	0.885629	1.00214	0.116514	Fam162a
Mrpl41	0.622655	0.738889	0.116234	Mrpl41
Trmt1	0.220885	0.337031	0.116146	Trmt1
Npm3	0.132001	0.248093	0.116092	Npm3
2310033P09Rik	0.119961	0.236033	0.116072	2310033P09Rik
Psph	0.945501	1.06151	0.116005	Psph
Nfkb1	0.0902857	0.206238	0.115952	Nfkb1
Tmem53	0.190222	0.306049	0.115828	Tmem53
Zfp746	0.0231445	0.138947	0.115803	Zfp746
Mrpl27	0.722549	0.838303	0.115753	Mrpl27
Uckl1	0.143596	0.259336	0.11574	Uckl1
Rad52	0	0.11571	0.11571	Rad52
Reep5	1.47318	1.58887	0.115692	Reep5
Dnaic1	0.157778	0.273409	0.11563	Dnaic1
Ptpn18	0.0279767	0.143582	0.115605	Ptpn18
Enpp1	0.0216477	0.137066	0.115418	Enpp1
Smg7	0.0888629	0.204269	0.115406	Smg7
Cep128	0.0277941	0.143127	0.115333	Cep128
Ep300	0.00369169	0.119021	0.115329	Ep300
Noct	0.0811208	0.196443	0.115323	Noct
Snx32	0.234782	0.350077	0.115296	Snx32
Acyp1	0.277467	0.392759	0.115292	Acyp1
Hnrnpa0	0.0649038	0.180047	0.115143	Hnrnpa0
[truncated: 11,039 more rows]

## Sheet: Endothelial
gene_id	Control	Treated	diff	gene
Hbb-bt	0.597162	1.90901	1.31185	Hbb-bt
Hbb-bs	3.16701	3.8492	0.682188	Hbb-bs
Wbp2	0.346053	0.996698	0.650645	Wbp2
Dbp	0.437493	1.03488	0.597388	Dbp
Ckb	1.03649	1.6201	0.583617	Ckb
Comt	1.22338	1.79325	0.569874	Comt
Hdgf	0.304358	0.867067	0.562708	Hdgf
Atp1b1	0.0311808	0.581618	0.550438	Atp1b1
Rpl22	1.70149	2.25045	0.548965	Rpl22
Hspa1a	0.133719	0.68217	0.548451	Hspa1a
Lamtor4	0.4644	1.00849	0.544086	Lamtor4
Gm11808	1.54477	2.0864	0.541636	Gm11808
Mbp	2.06349	2.60319	0.539707	Mbp
Rps26	1.77948	2.31848	0.538995	Rps26
Psmb4	0.62941	1.16533	0.535923	Psmb4
Abhd2	1.53295	2.05498	0.522028	Abhd2
Clic1	1.24022	1.75863	0.518409	Clic1
Capzb	1.13621	1.6325	0.496299	Capzb
Ndufb5	0.895544	1.38926	0.493715	Ndufb5
Rpl27-ps3	1.14329	1.63332	0.490026	Rpl27-ps3
Slbp	0.181539	0.668899	0.487359	Slbp
Baiap2	0.346773	0.832937	0.486164	Baiap2
Arf6	0.606147	1.09153	0.485387	Arf6
Gm10269	0.674952	1.15511	0.480159	Gm10269
Ube2e1	0.2068	0.685967	0.479166	Ube2e1
Rpl9-ps6	1.74792	2.2249	0.47697	Rpl9-ps6
Aif1l	0.237423	0.711129	0.473706	Aif1l
Rpl36a	1.64814	2.1216	0.473465	Rpl36a
Gkn3	1.73665	2.20938	0.47273	Gkn3
Fxyd5	1.85421	2.3259	0.471695	Fxyd5
1110038F14Rik	0.338921	0.808323	0.469402	1110038F14Rik
Nkd1	1.06199	1.5258	0.463817	Nkd1
Rplp1	2.50162	2.96136	0.459738	Rplp1
Tmsb10	2.68474	3.14232	0.45758	Tmsb10
Gstp1	0.309048	0.766181	0.457134	Gstp1
Dph3	0.370827	0.821076	0.450249	Dph3
Prelid1	0.583892	1.03161	0.447721	Prelid1
Zfp386	0.070591	0.517711	0.44712	Zfp386
Rps10	2.00961	2.45671	0.447101	Rps10
Atp5e	1.69977	2.14606	0.446295	Atp5e
Nampt	0.626957	1.07239	0.445435	Nampt
Plod1	0.249819	0.694687	0.444869	Plod1
Nudt16l1	0.164595	0.607678	0.443083	Nudt16l1
Tmem205	0.38949	0.828673	0.439183	Tmem205
Tceal1	0.112195	0.549964	0.437769	Tceal1
Notch4	0.209813	0.646315	0.436502	Notch4
Nmi	0.298438	0.734474	0.436036	Nmi
Ppp1r16b	0.488023	0.920578	0.432555	Ppp1r16b
Slc38a3	0.727591	1.15858	0.430987	Slc38a3
Gm5914	0	0.430302	0.430302	Gm5914
Rps24	2.59653	3.02591	0.429376	Rps24
Cbx3	0.875684	1.30079	0.425103	Cbx3
Kdelr2	0.391317	0.811584	0.420267	Kdelr2
Fubp3	0.0806812	0.497475	0.416794	Fubp3
Grcc10	0.739013	1.15545	0.416439	Grcc10
Tmem100	0.199689	0.615688	0.415999	Tmem100
Chchd3	0.390175	0.803578	0.413404	Chchd3
Tfrc	0.797474	1.21059	0.41312	Tfrc
P4hb	0.350709	0.760389	0.40968	P4hb
Rps29	3.32415	3.73323	0.40908	Rps29
Rps21	2.09224	2.49994	0.4077	Rps21
Hsbp1	1.15813	1.56117	0.403038	Hsbp1
Eci1	0.37783	0.780657	0.402826	Eci1
Oaz2	1.34911	1.75039	0.401276	Oaz2
Gpx4	2.34766	2.74798	0.400322	Gpx4
Pgk1	0.430989	0.830882	0.399893	Pgk1
Insig1	0.243332	0.642637	0.399305	Insig1
Tpt1	2.54057	2.9395	0.398928	Tpt1
Ndufb10	1.0605	1.45883	0.398323	Ndufb10
Txndc17	0.939468	1.33509	0.395618	Txndc17
Anxa3	1.68389	2.07887	0.394976	Anxa3
Cox7b	0.874186	1.26817	0.393987	Cox7b
Wdr89	0.926102	1.31966	0.393559	Wdr89
Tagln2	1.17967	1.57215	0.392478	Tagln2
Sesn1	0.311694	0.702383	0.390688	Sesn1
Mon1a	0.117693	0.507581	0.389888	Mon1a
Rpl38	3.09659	3.48551	0.388926	Rpl38
Psme1	0.958114	1.34698	0.388865	Psme1
Rps27rt	1.96593	2.35364	0.387718	Rps27rt
Eci2	0.718102	1.10482	0.38672	Eci2
Rps4x	2.56072	2.94688	0.386159	Rps4x
Polr2e	0.903864	1.28671	0.382846	Polr2e
Smyd2	0.0423906	0.425084	0.382694	Smyd2
Trir	0.870322	1.25294	0.38262	Trir
Mea1	0.502633	0.883455	0.380822	Mea1
Nrep	0.232512	0.61288	0.380368	Nrep
Fam96b	0.382111	0.761848	0.379737	Fam96b
Mrpl12	0.377841	0.756203	0.378362	Mrpl12
Gpm6a	0.33608	0.712386	0.376306	Gpm6a
Nelfcd	0.1311	0.506173	0.375073	Nelfcd
B4gat1	0.235034	0.609187	0.374153	B4gat1
Rpl12	1.23313	1.60614	0.373014	Rpl12
Rps28	2.44444	2.81607	0.37163	Rps28
Rcan1	0.129215	0.499326	0.370111	Rcan1
Trim28	0.164725	0.5343	0.369575	Trim28
Marf1	0.384107	0.751581	0.367474	Marf1
Akirin2	0.143801	0.510178	0.366377	Akirin2
Rpl6	2.42666	2.79223	0.36557	Rpl6
Htra1	0.502741	0.866513	0.363771	Htra1
Eif3j1	0.263763	0.62685	0.363086	Eif3j1
Malsu1	0.257295	0.618938	0.361643	Malsu1
Pdcl3	0.705257	1.06541	0.360149	Pdcl3
S100a13	1.54028	1.89992	0.359644	S100a13
Amfr	0.468222	0.826735	0.358512	Amfr
Rnaset2b	0.42964	0.788126	0.358486	Rnaset2b
Bloc1s1	0.329998	0.688291	0.358293	Bloc1s1
Nedd8	1.40406	1.76198	0.357917	Nedd8
1110059G10Rik	0.407185	0.76503	0.357845	1110059G10Rik
Fis1	1.21472	1.57112	0.3564	Fis1
Fbxo8	0.169014	0.525093	0.356079	Fbxo8
Nrgn	0	0.356019	0.356019	Nrgn
Cpe	1.0472	1.40301	0.355811	Cpe
Mylpf	0.33896	0.694191	0.355231	Mylpf
Tsc22d3	1.03885	1.39292	0.354064	Tsc22d3
Ubald2	0.758677	1.11253	0.35385	Ubald2
Gm5239	0.228398	0.581043	0.352645	Gm5239
Ublcp1	0.35597	0.708564	0.352594	Ublcp1
Bbip1	0.553861	0.906421	0.35256	Bbip1
Nrip1	0.241806	0.593858	0.352051	Nrip1
Rpl28	2.1628	2.51413	0.351328	Rpl28
Rpusd3	0	0.350969	0.350969	Rpusd3
Spock2	2.59131	2.94214	0.350825	Spock2
Rps19	3.15156	3.5013	0.349734	Rps19
Rps20	2.28366	2.63264	0.348979	Rps20
Psmd9	0.184777	0.533294	0.348518	Psmd9
Tpi1	0.812802	1.16124	0.348437	Tpi1
Ube2i	0.579954	0.92832	0.348366	Ube2i
Lrrc8a	0.710593	1.05884	0.348249	Lrrc8a
AW112010	1.11552	1.46327	0.347752	AW112010
Usp16	0.23638	0.583776	0.347396	Usp16
Tomm20	0.782926	1.12968	0.346752	Tomm20
Ifi35	0.847718	1.19435	0.346628	Ifi35
Npc2	1.03933	1.38389	0.344561	Npc2
Fau	2.8784	3.22281	0.344405	Fau
Mcrip1	0.788493	1.13256	0.344064	Mcrip1
Ino80e	0.172971	0.515675	0.342704	Ino80e
Rpl23	2.40453	2.74696	0.342424	Rpl23
Foxl2	0.178982	0.52058	0.341599	Foxl2
Rps17	2.47739	2.81896	0.341572	Rps17
Kctd20	0.364982	0.704501	0.339519	Kctd20
Actb	3.2224	3.56144	0.339038	Actb
Ddc	0.493593	0.830906	0.337313	Ddc
Usf2	0.527426	0.864257	0.336831	Usf2
Dpysl2	0.58806	0.924407	0.336347	Dpysl2
Ormdl2	0.334411	0.669801	0.335391	Ormdl2
Smim14	1.32561	1.66079	0.335182	Smim14
Dnaja1	0.941107	1.27579	0.334681	Dnaja1
Ss18	0.140799	0.474229	0.33343	Ss18
Rps7	2.41234	2.74572	0.333386	Rps7
Eid1	0.26768	0.600058	0.332378	Eid1
Pink1	0.782261	1.11419	0.331932	Pink1
Ddx39	0.393245	0.724239	0.330993	Ddx39
Efna1	0.674365	1.00508	0.330717	Efna1
Rpl30	2.07882	2.40885	0.330023	Rpl30
Atp5g2	1.40181	1.73155	0.329749	Atp5g2
Med31	0.2835	0.61283	0.32933	Med31
Rpl21	2.65229	2.98098	0.328696	Rpl21
Rpl29	2.18752	2.51592	0.328407	Rpl29
Rpa3	0.143443	0.471829	0.328386	Rpa3
Nptxr	0.0229708	0.351334	0.328364	Nptxr
S100b	0.350495	0.678773	0.328279	S100b
Ndufv2	0.978023	1.30571	0.327689	Ndufv2
Rbp1	0.344308	0.671987	0.327679	Rbp1
Mt1	2.4104	2.73806	0.32766	Mt1
Atp5k	1.28065	1.60795	0.327302	Atp5k
Tspan4	0.786551	1.11283	0.326276	Tspan4
Rpl7a-ps5	0.341189	0.667206	0.326017	Rpl7a-ps5
Ifit1	0.413926	0.739793	0.325868	Ifit1
Rpl4	2.11719	2.44302	0.325835	Rpl4
Vps36	0.631958	0.957544	0.325586	Vps36
Xpa	0.205717	0.531094	0.325377	Xpa
Ube2g1	0.541767	0.867034	0.325267	Ube2g1
St3gal4	0.026567	0.351392	0.324825	St3gal4
Rpl31	2.53698	2.86124	0.324261	Rpl31
Cox7a2l	1.65263	1.97681	0.324187	Cox7a2l
Casp6	0.28712	0.611265	0.324145	Casp6
Lypla1	0.394222	0.718322	0.3241	Lypla1
Sv2a	0	0.323881	0.323881	Sv2a
Syt5	0	0.323881	0.323881	Syt5
Gsg1l	0	0.323881	0.323881	Gsg1l
Ndufa12	0.971332	1.29444	0.323109	Ndufa12
Psma7	1.34739	1.67	0.322603	Psma7
Supt4a	0.719777	1.04197	0.322195	Supt4a
Gm8186	0.551917	0.873839	0.321922	Gm8186
Tmsb4x	4.3828	4.70374	0.320936	Tmsb4x
Dcun1d5	0.42044	0.741002	0.320562	Dcun1d5
Ndufv3	1.17335	1.49385	0.320507	Ndufv3
Tax1bp3	0.79882	1.119	0.320177	Tax1bp3
Gm10076	0.76861	1.08865	0.320039	Gm10076
Nell2	0.0469358	0.366915	0.319979	Nell2
Cd320	0.647111	0.966004	0.318894	Cd320
Btbd3	0.121046	0.439771	0.318725	Btbd3
Btbd2	0.141165	0.459122	0.317957	Btbd2
Nudt21	0.207351	0.525084	0.317733	Nudt21
2010107E04Rik	1.17275	1.49031	0.317556	2010107E04Rik
Ddah2	0.421271	0.738653	0.317382	Ddah2
Cdkn2b	0.252203	0.56956	0.317357	Cdkn2b
BC017643	0.0455885	0.362915	0.317326	BC017643
C130074G19Rik	0.865886	1.18316	0.317277	C130074G19Rik
Klf9	1.02335	1.3404	0.317052	Klf9
Eno1	1.17506	1.49204	0.316976	Eno1
Max	0.877642	1.19459	0.316947	Max
Rrn3	0.00766018	0.324551	0.316891	Rrn3
Gpx1	1.4393	1.75603	0.31673	Gpx1
Mgp	1.0238	1.34001	0.316206	Mgp
Bag1	1.01355	1.32975	0.3162	Bag1
Mrps36	0.288894	0.604677	0.315783	Mrps36
Tuba1a	2.11623	2.43163	0.315403	Tuba1a
Abhd16a	0.40942	0.724445	0.315025	Abhd16a
Glud1	0.466641	0.780721	0.31408	Glud1
1810022K09Rik	0.319299	0.632081	0.312782	1810022K09Rik
Gbp2	0.424495	0.737273	0.312778	Gbp2
Selenow	2.10424	2.41681	0.312569	Selenow
Cetn2	0.576234	0.888729	0.312494	Cetn2
Rundc3a	0.0133326	0.325439	0.312106	Rundc3a
Rps23	3.00962	3.32137	0.311752	Rps23
Slc39a1	0.47029	0.781835	0.311544	Slc39a1
Rpl11	2.38276	2.694	0.311234	Rpl11
Rsbn1l	0.537083	0.848295	0.311213	Rsbn1l
Cfl2	0.507916	0.818521	0.310605	Cfl2
Rpl36al	1.02188	1.3324	0.310521	Rpl36al
Gm13056	0.170265	0.48039	0.310125	Gm13056
Rac1	1.48751	1.7957	0.308184	Rac1
Pitpnc1	0.455588	0.763772	0.308183	Pitpnc1
Snrpd3	0.685734	0.993832	0.308099	Snrpd3
Btrc	0.0275446	0.335433	0.307888	Btrc
Cbfa2t2	0.0202271	0.327962	0.307735	Cbfa2t2
Spg20	0.156853	0.462882	0.30603	Spg20
Cacna2d1	0.0179876	0.323881	0.305893	Cacna2d1
Kctd10	1.10845	1.41329	0.30484	Kctd10
Atg13	0.0901757	0.394553	0.304377	Atg13
Rpl15	2.29442	2.59845	0.30403	Rpl15
Itpripl1	0.238897	0.542554	0.303656	Itpripl1
Mrpl43	0.408804	0.711739	0.302936	Mrpl43
Emg1	0.640468	0.942933	0.302465	Emg1
Taldo1	1.35559	1.6578	0.302211	Taldo1
Ucp2	0.881208	1.1833	0.302088	Ucp2
Atl2	0.161645	0.463588	0.301943	Atl2
Aldh1a1	0.0873392	0.388977	0.301638	Aldh1a1
H2-M3	0.161482	0.462887	0.301406	H2-M3
Arl3	0.506691	0.80712	0.300429	Arl3
Ttc32	0.1408	0.440737	0.299937	Ttc32
Zfp422	0.409907	0.709261	0.299355	Zfp422
Bcs1l	0.0360386	0.334962	0.298924	Bcs1l
Gpbp1l1	0.492749	0.791361	0.298612	Gpbp1l1
Herpud1	0.653673	0.95215	0.298477	Herpud1
Mnat1	0.151996	0.450456	0.29846	Mnat1
Nsmce3	0.262593	0.560653	0.29806	Nsmce3
Ppia	2.90578	3.20344	0.297665	Ppia
Rpl13a-ps1	1.54768	1.84488	0.297199	Rpl13a-ps1
Mdh2	0.917392	1.21434	0.296953	Mdh2
Psmb10	1.01551	1.31225	0.296737	Psmb10
Uba52	0.636396	0.932535	0.29614	Uba52
Dnajc24	0.113676	0.40884	0.295164	Dnajc24
Alad	0.416451	0.711166	0.294715	Alad
Klc1	0.517132	0.811748	0.294615	Klc1
Ccny	0.552058	0.846613	0.294555	Ccny
Nxt1	0.148621	0.442994	0.294373	Nxt1
Aldh2	1.44822	1.7424	0.294181	Aldh2
Spaar	0.368024	0.661525	0.293501	Spaar
Mpc2	0.652006	0.945389	0.293384	Mpc2
Mcee	0.439114	0.732372	0.293257	Mcee
Dnajc8	1.15637	1.44932	0.29295	Dnajc8
Trim27	0.188207	0.481099	0.292891	Trim27
9330160F10Rik	0	0.292765	0.292765	9330160F10Rik
Pomp	1.97507	2.26739	0.292317	Pomp
Med24	0.0783425	0.370483	0.292141	Med24
Ak3	0.838526	1.12986	0.291334	Ak3
Actg1	2.74523	3.03606	0.290831	Actg1
Sin3b	0.595999	0.885784	0.289785	Sin3b
Cirbp	0.952548	1.24219	0.289646	Cirbp
Hip1r	0.297617	0.586896	0.289279	Hip1r
Serinc3	1.64307	1.93207	0.289007	Serinc3
Ifit3	0.170461	0.459361	0.2889	Ifit3
Tnpo2	0	0.288854	0.288854	Tnpo2
Lyn	0.200469	0.489298	0.288829	Lyn
Gm10036	0.558389	0.847193	0.288804	Gm10036
Tsen15	0.268275	0.557038	0.288763	Tsen15
R3hdm4	0.286304	0.574956	0.288651	R3hdm4
Rps25	2.45892	2.74742	0.288501	Rps25
Crk	0.536048	0.824279	0.288231	Crk
Med19	0.201849	0.48937	0.287521	Med19
Rps8	2.88425	3.17149	0.287244	Rps8
Cbx8	0.00766018	0.294808	0.287148	Cbx8
Pxn	0.340668	0.626212	0.285545	Pxn
Coasy	0.0620535	0.34729	0.285236	Coasy
Prdx3	0.296944	0.581045	0.284101	Prdx3
Rpl35a	2.92583	3.20982	0.28399	Rpl35a
Bbs5	0.0244838	0.308133	0.283649	Bbs5
Acbd4	0.268089	0.551569	0.28348	Acbd4
Zfp326	0.331335	0.614713	0.283378	Zfp326
Ctla2a	1.94922	2.23221	0.282991	Ctla2a
Arfip1	0.143157	0.426084	0.282927	Arfip1
Spcs1	0.990267	1.27314	0.282873	Spcs1
Dmac1	0.392396	0.675199	0.282804	Dmac1
Atp5a1	1.41663	1.69895	0.282327	Atp5a1
Lsm10	0.142168	0.424357	0.282189	Lsm10
Psma2	1.16884	1.45089	0.282052	Psma2
Rpl23a	2.82161	3.10298	0.281367	Rpl23a
Zfand2a	0.0929261	0.374128	0.281202	Zfand2a
Fam220a	0.239041	0.519553	0.280512	Fam220a
Klhl9	0.197632	0.477849	0.280217	Klhl9
Gnas	2.63697	2.91655	0.279586	Gnas
Fnip1	0.0958348	0.374794	0.278959	Fnip1
Emc7	0.796673	1.07555	0.278879	Emc7
Rpl41	3.54314	3.82192	0.278783	Rpl41
Rnf149	0	0.278269	0.278269	Rnf149
Mad2l2	0.340376	0.618543	0.278167	Mad2l2
Letm1	0.21944	0.497446	0.278007	Letm1
Mcf2l	0.616152	0.894134	0.277982	Mcf2l
Ap3m1	0.157517	0.435489	0.277973	Ap3m1
Cgrrf1	0.189064	0.466931	0.277867	Cgrrf1
Eef1a1	2.84849	3.12602	0.277538	Eef1a1
Cox4i1	2.20988	2.4872	0.277323	Cox4i1
Gatad1	0.550754	0.827983	0.277229	Gatad1
Hmbox1	0.213737	0.490893	0.277156	Hmbox1
Arf5	1.31805	1.59513	0.277084	Arf5
Urm1	0.226616	0.503604	0.276988	Urm1
Rpl10	0.623844	0.90075	0.276906	Rpl10
Ttc4	0.0538958	0.330237	0.276341	Ttc4
Tmem242	0.493912	0.770139	0.276227	Tmem242
Map4k3	0.103503	0.379413	0.27591	Map4k3
Rpl35	2.09982	2.37506	0.275234	Rpl35
Mrpl54	0.546398	0.821274	0.274876	Mrpl54
Hspb8	0.208245	0.482811	0.274566	Hspb8
Ptgds	0.225702	0.500001	0.274299	Ptgds
Gria3	0	0.273702	0.273702	Gria3
Cdc42ep4	0.16754	0.441154	0.273614	Cdc42ep4
Vamp2	0.379855	0.653157	0.273302	Vamp2
Zdhhc4	0.336788	0.609611	0.272822	Zdhhc4
Atp5g3	0.607996	0.879603	0.271606	Atp5g3
Nadk	0.36994	0.64133	0.27139	Nadk
Lzts2	0.388703	0.659835	0.271132	Lzts2
Usp7	0.16381	0.434909	0.271099	Usp7
Trappc2l	0.546527	0.817494	0.270967	Trappc2l
Ercc1	0.158965	0.429879	0.270914	Ercc1
Lsm2	0.419292	0.69004	0.270748	Lsm2
Qdpr	0.635625	0.905143	0.269518	Qdpr
Icam2	1.38714	1.65658	0.269439	Icam2
Suclg2	0.115292	0.384479	0.269187	Suclg2
Eif3e	0.880152	1.1484	0.268244	Eif3e
Dazap2	0.966366	1.23423	0.26786	Dazap2
Rps15	2.70024	2.96736	0.267122	Rps15
Rasd1	0.379111	0.645396	0.266285	Rasd1
Rps6	2.81287	3.07913	0.266258	Rps6
Rbx1	1.73279	1.99903	0.266244	Rbx1
Gabarapl1	0.949966	1.21583	0.265868	Gabarapl1
Zc2hc1a	0.0580201	0.323884	0.265864	Zc2hc1a
Nsmce1	0.55585	0.821505	0.265655	Nsmce1
Cluap1	0.00766018	0.273067	0.265407	Cluap1
Akr1b3	0.29845	0.56383	0.26538	Akr1b3
Ptms	1.48065	1.74595	0.265297	Ptms
Kdelr1	0.668257	0.933491	0.265234	Kdelr1
Ifih1	0.357313	0.622521	0.265208	Ifih1
Myh9	0.649441	0.913335	0.263894	Myh9
Tef	0.353825	0.617005	0.26318	Tef
Ppa1	0.141066	0.403992	0.262926	Ppa1
Polr1c	0.138561	0.401084	0.262523	Polr1c
Ppp2r5d	0.0270626	0.288955	0.261892	Ppp2r5d
Sf3b6	0.777028	1.03888	0.261852	Sf3b6
Aip	0.347446	0.609293	0.261847	Aip
Fkbp3	0.791332	1.05286	0.261529	Fkbp3
Cab39l	0.18651	0.447733	0.261222	Cab39l
Btbd10	0.130823	0.390992	0.260169	Btbd10
Snrpb2	0.445151	0.70528	0.260129	Snrpb2
Sh3bgrl3	1.92582	2.18594	0.260119	Sh3bgrl3
Nckap1	0.713352	0.972706	0.259353	Nckap1
Atp5b	1.69526	1.95409	0.258832	Atp5b
Rnf181	0.253304	0.511974	0.25867	Rnf181
Rheb	1.258	1.51652	0.258518	Rheb
Rps5	2.73453	2.99263	0.258098	Rps5
Tspan7	0.256976	0.514837	0.257861	Tspan7
Myl4	0.0433917	0.300641	0.257249	Myl4
Mgst1	0.402523	0.659429	0.256906	Mgst1
Eif3h	1.36082	1.61768	0.256856	Eif3h
Atp6v1g1	1.31346	1.57025	0.256792	Atp6v1g1
Bysl	0.0229685	0.279338	0.25637	Bysl
Setd7	0.101544	0.357445	0.255901	Setd7
Eif3i	0.53175	0.787599	0.25585	Eif3i
Ube2b	0.682972	0.938762	0.25579	Ube2b
Rps27a	2.82257	3.07831	0.255741	Rps27a
Med7	0.0705154	0.326018	0.255503	Med7
Snrpc	0.643303	0.898753	0.25545	Snrpc
Csrp2	1.14573	1.40083	0.255097	Csrp2
Cog4	0.185534	0.440513	0.254979	Cog4
Tsta3	0.0730389	0.32793	0.254891	Tsta3
Blmh	0.286424	0.541273	0.254849	Blmh
Isg15	1.1196	1.37442	0.254812	Isg15
Samhd1	0.600657	0.855463	0.254805	Samhd1
Taf15	0.473131	0.727772	0.254641	Taf15
Rpl13a	2.17733	2.43181	0.254487	Rpl13a
Cd200	1.27586	1.53009	0.254225	Cd200
Tfip11	0.0179876	0.272157	0.254169	Tfip11
Trmt112	0.610084	0.864189	0.254104	Trmt112
Parp2	0.28049	0.534587	0.254097	Parp2
Ctnnbip1	0.955647	1.20936	0.253711	Ctnnbip1
Scrg1	0.02754	0.281152	0.253612	Scrg1
Xpc	0.067114	0.320683	0.253569	Xpc
Amotl2	0.282562	0.535727	0.253166	Amotl2
Sp100	0.784389	1.03749	0.253105	Sp100
Scarb1	0.746815	0.999641	0.252826	Scarb1
Frmd8	0.027247	0.279986	0.252739	Frmd8
Card19	0.744727	0.997462	0.252735	Card19
Sema7a	0.946661	1.19882	0.252158	Sema7a
Prcp	0.160659	0.412805	0.252146	Prcp
Cct2	0.399759	0.651873	0.252114	Cct2
Pkm	1.82391	2.07588	0.251971	Pkm
Cox6c	2.02517	2.27645	0.251285	Cox6c
Sod2	0.557647	0.808857	0.251211	Sod2
Hmox2	0.287	0.538007	0.251007	Hmox2
Snx18	0.0570188	0.307986	0.250967	Snx18
Gab1	0.204475	0.45542	0.250944	Gab1
Scyl1	0.208454	0.459291	0.250837	Scyl1
Smim15	0.467038	0.717617	0.250579	Smim15
Zbtb42	0	0.250494	0.250494	Zbtb42
Myct1	0.356386	0.606847	0.250461	Myct1
Xxylt1	0.0429352	0.293334	0.250398	Xxylt1
Slc25a18	0.0249041	0.275255	0.250351	Slc25a18
Jak1	0.389121	0.639165	0.250044	Jak1
Rpl27a	2.88992	3.13973	0.249811	Rpl27a
Rras	0.47011	0.719748	0.249638	Rras
Ppp6r2	0.204993	0.45441	0.249416	Ppp6r2
Ttyh2	0.685365	0.934732	0.249368	Ttyh2
Coq3	0.0185452	0.267733	0.249187	Coq3
Dtd1	0.297141	0.545827	0.248686	Dtd1
Spr	1.00103	1.24955	0.248514	Spr
D730003I15Rik	0.218339	0.466532	0.248193	D730003I15Rik
Odf2	0.116445	0.364586	0.248142	Odf2
Rps15a	2.49138	2.73948	0.248101	Rps15a
Cst3	3.12271	3.37072	0.248007	Cst3
Slc39a8	0.699054	0.94692	0.247867	Slc39a8
Ppp1ca	1.36504	1.61268	0.247632	Ppp1ca
Ccdc71	0.307315	0.554785	0.24747	Ccdc71
Zbtb4	0.470347	0.717692	0.247345	Zbtb4
Ppp2r2d	0.335252	0.582594	0.247342	Ppp2r2d
Gm9889	0.0253078	0.27247	0.247163	Gm9889
Smad1	0.268522	0.515644	0.247122	Smad1
Dguok	0.526435	0.772601	0.246167	Dguok
Rpl7a	1.32505	1.5709	0.245855	Rpl7a
Rnf113a2	0.0610734	0.306201	0.245128	Rnf113a2
Phip	0.518487	0.763249	0.244762	Phip
Mtg1	0.0133717	0.258032	0.24466	Mtg1
Tcf7	0.197508	0.442147	0.244639	Tcf7
Chmp7	0.36429	0.608517	0.244227	Chmp7
Stard3nl	0.617001	0.861006	0.244005	Stard3nl
Ank3	0	0.243876	0.243876	Ank3
Ier2	1.341	1.58465	0.243654	Ier2
Trmt1l	0.237691	0.481195	0.243505	Trmt1l
Prdx1	2.02738	2.27083	0.243451	Prdx1
Usp6nl	0.0606221	0.304064	0.243442	Usp6nl
Cops6	0.834685	1.07772	0.243031	Cops6
Ndufc2	1.19016	1.43298	0.242814	Ndufc2
Ap2b1	0.489559	0.731616	0.242056	Ap2b1
Rps13	2.25748	2.49915	0.241675	Rps13
Gabarapl2	1.54205	1.78342	0.24137	Gabarapl2
Mfng	0.526664	0.767297	0.240633	Mfng
Sec61g	1.38387	1.62445	0.240575	Sec61g
Adss	0.474154	0.714535	0.240381	Adss
Usp30	0.0185452	0.258815	0.24027	Usp30
Tmem178	0.0202271	0.260467	0.24024	Tmem178
Naa50	0.288409	0.528358	0.239949	Naa50
Eps15l1	0.13235	0.37223	0.239879	Eps15l1
Pop7	0.325633	0.565201	0.239568	Pop7
Smarcd1	0.296654	0.536139	0.239484	Smarcd1
Snrpd2	0.939072	1.17824	0.239172	Snrpd2
Ppwd1	0.149037	0.388011	0.238974	Ppwd1
Serpinh1	0.904387	1.14335	0.238968	Serpinh1
Keap1	0.485236	0.723757	0.238521	Keap1
Dpm1	0.321299	0.559728	0.238429	Dpm1
Fam92a	0.296003	0.533713	0.23771	Fam92a
Fh1	0.250203	0.487729	0.237526	Fh1
Plpp3	0.404248	0.641595	0.237347	Plpp3
Lsm6	0.796487	1.0338	0.237312	Lsm6
Fdps	0.404052	0.640748	0.236696	Fdps
Akr1a1	1.97988	2.21648	0.236599	Akr1a1
Sdhaf1	0.371942	0.608527	0.236586	Sdhaf1
Fam96a	0.358627	0.595152	0.236525	Fam96a
Pam	0.764593	1.00104	0.236446	Pam
Eftud2	0.232169	0.468405	0.236235	Eftud2
Ptprn	0	0.236217	0.236217	Ptprn
Ccng1	0.150448	0.386455	0.236007	Ccng1
Xpr1	0.360517	0.596496	0.235979	Xpr1
Fbxo33	0.00766018	0.243405	0.235744	Fbxo33
Rabgap1	0.375907	0.611642	0.235735	Rabgap1
Rexo2	0.946102	1.1817	0.235593	Rexo2
Atp5o.1	1.22161	1.45719	0.235574	Atp5o.1
9530068E07Rik	0.293941	0.52948	0.235539	9530068E07Rik
Anapc16	0.66787	0.903331	0.235461	Anapc16
Ndufa7	2.06228	2.29739	0.235109	Ndufa7
Pmepa1	0.331612	0.566706	0.235094	Pmepa1
Gbp3	0.587691	0.822686	0.234995	Gbp3
Gyg	0.206556	0.441481	0.234925	Gyg
Zxdb	0	0.234918	0.234918	Zxdb
Tmem159	0.499247	0.73386	0.234613	Tmem159
Polr2l	0.501047	0.735504	0.234457	Polr2l
Srgap1	0.0838101	0.318173	0.234363	Srgap1
Wdsub1	0.135741	0.369898	0.234157	Wdsub1
Tmem189	0.0501959	0.283913	0.233717	Tmem189
Palmd	1.19901	1.43268	0.233671	Palmd
Rpl19	2.59228	2.82584	0.23356	Rpl19
Creb3	0.401679	0.635196	0.233517	Creb3
Parp12	0.241471	0.474857	0.233386	Parp12
Chchd5	0.165472	0.39885	0.233377	Chchd5
Serpinb6b	0.0790238	0.312296	0.233272	Serpinb6b
Pla2g16	0.822236	1.05549	0.233252	Pla2g16
Wwox	0.13897	0.372055	0.233084	Wwox
Eif4a1	1.33058	1.56357	0.232981	Eif4a1
D5Ertd579e	0.281042	0.513913	0.232871	D5Ertd579e
Hnrnpa1	0.772351	1.00491	0.232558	Hnrnpa1
Dhx16	0.0861843	0.318578	0.232393	Dhx16
Trib2	0.169523	0.401878	0.232355	Trib2
Ap1m1	0.168453	0.400795	0.232343	Ap1m1
Ttc1	0.324674	0.556897	0.232223	Ttc1
Abcb10	0.0229708	0.254999	0.232029	Abcb10
Bola3	0.862172	1.09409	0.231917	Bola3
Faf1	0.152961	0.384729	0.231768	Faf1
Rala	0.63385	0.865618	0.231767	Rala
Mrps33	1.06842	1.30009	0.231667	Mrps33
Il15	0.0251563	0.256579	0.231423	Il15
Emc4	0.551191	0.78257	0.231379	Emc4
Taf9b	0.257838	0.489146	0.231308	Taf9b
Capn2	0.805531	1.03675	0.231217	Capn2
Zfp12	0.0651641	0.296334	0.23117	Zfp12
Gpr180	0.127315	0.358419	0.231105	Gpr180
Rpl17	2.52698	2.75795	0.230978	Rpl17
Fn1	1.65287	1.88381	0.230934	Fn1
Atp5c1	1.22818	1.459	0.230821	Atp5c1
Tmem256	0.97613	1.20687	0.230744	Tmem256
Larp7	0.0837434	0.314454	0.23071	Larp7
Plp1	0.36033	0.591025	0.230695	Plp1
Socs2	0.788844	1.01948	0.230633	Socs2
Pick1	0.110072	0.340704	0.230631	Pick1
Ccdc58	0.181044	0.411623	0.230578	Ccdc58
Ythdf1	0.182497	0.413051	0.230553	Ythdf1
Akt3	0.156442	0.386744	0.230301	Akt3
Slc16a1	1.53467	1.76492	0.230244	Slc16a1
Rpl3	2.57654	2.80677	0.230235	Rpl3
H2afv	1.25079	1.48076	0.229963	H2afv
Nemf	0.514865	0.744672	0.229806	Nemf
Adh5	0.527623	0.757361	0.229738	Adh5
Wdr44	0.0608302	0.290499	0.229669	Wdr44
Smad7	0.627837	0.857239	0.229402	Smad7
Rcan3	0.0470482	0.276161	0.229113	Rcan3
Rpl39	2.18915	2.41808	0.22893	Rpl39
Nacc1	0.0316323	0.260308	0.228676	Nacc1
Gm15998	0.23541	0.464082	0.228672	Gm15998
Kdsr	0.192405	0.420792	0.228387	Kdsr
Ccdc127	0.380921	0.6093	0.228379	Ccdc127
Rnf170	0.144661	0.372992	0.228332	Rnf170
Mrpl17	0.690092	0.918292	0.2282	Mrpl17
Zgpat	0	0.228014	0.228014	Zgpat
Rragc	0.28354	0.511515	0.227975	Rragc
Zscan12	0.0264897	0.254402	0.227912	Zscan12
Ccdc107	0.381488	0.609349	0.227861	Ccdc107
Ggh	0.473499	0.701326	0.227827	Ggh
Ttll1	0.0270626	0.254635	0.227572	Ttll1
Ptk2	0.600159	0.827487	0.227328	Ptk2
Lrrc45	0.0804485	0.307708	0.22726	Lrrc45
Cnih4	0.615926	0.843182	0.227256	Cnih4
Unc45b	0.448579	0.675822	0.227242	Unc45b
Mif	0.998216	1.22545	0.227235	Mif
Pomc	0.284688	0.511607	0.226919	Pomc
Car4	2.583	2.80986	0.226862	Car4
Vamp8	1.17855	1.40535	0.226803	Vamp8
Rnf166	0.168605	0.395082	0.226477	Rnf166
1810030O07Rik	0.0805772	0.306967	0.226389	1810030O07Rik
Hdac8	0.0202271	0.24651	0.226282	Hdac8
Elovl1	0.59037	0.816485	0.226115	Elovl1
Get4	0.279654	0.505476	0.225822	Get4
Eef1akmt1	0.155293	0.381065	0.225772	Eef1akmt1
Grap	1.17753	1.40324	0.225707	Grap
Dnm1	0	0.224859	0.224859	Dnm1
Fth1	3.40926	3.63398	0.224726	Fth1
Gtf3c6	0.310251	0.534969	0.224718	Gtf3c6
Rpl37a	3.28835	3.51288	0.224537	Rpl37a
Atf4	0.506665	0.731193	0.224529	Atf4
Tusc2	0.226253	0.450706	0.224452	Tusc2
Dpp9	0.033689	0.258073	0.224384	Dpp9
Pcnx3	0.0351859	0.259561	0.224375	Pcnx3
Gin1	0.04734	0.271616	0.224276	Gin1
Slc25a25	0.0861207	0.310351	0.22423	Slc25a25
Mta1	0.1537	0.377898	0.224198	Mta1
H2afz	1.52452	1.74867	0.224159	H2afz
Pla2g12a	0.280752	0.504599	0.223847	Pla2g12a
Fech	0.181386	0.405112	0.223726	Fech
Ebp	0.359912	0.583555	0.223643	Ebp
Plp2	0.180482	0.403784	0.223302	Plp2
Fbxo6	0.351839	0.575046	0.223207	Fbxo6
9430038I01Rik	0.0646013	0.287768	0.223167	9430038I01Rik
Tbxa2r	0.105278	0.328365	0.223087	Tbxa2r
Cfl1	2.16958	2.39251	0.222924	Cfl1
Cldn10	0.14239	0.36494	0.22255	Cldn10
Gnpda2	0.562018	0.783959	0.221941	Gnpda2
Snx4	0.234687	0.456578	0.221891	Snx4
Slc39a7	0.586273	0.808083	0.221811	Slc39a7
Mkrn1	0.509187	0.730897	0.22171	Mkrn1
Ifi27	1.50556	1.72691	0.221349	Ifi27
Pdxk	0.514191	0.735496	0.221305	Pdxk
Ugdh	0.103521	0.324756	0.221235	Ugdh
Fhl1	0.0383475	0.25929	0.220942	Fhl1
Polr2m	1.00429	1.22509	0.220796	Polr2m
Cdkn2c	0.187025	0.407588	0.220563	Cdkn2c
Gstt1	0.0133717	0.233763	0.220391	Gstt1
Lmo4	0.0600639	0.280243	0.220179	Lmo4
Adprhl2	0.153582	0.373705	0.220123	Adprhl2
Cox6a1	2.04508	2.26513	0.220049	Cox6a1
Ndufb9	1.20203	1.42204	0.220017	Ndufb9
Ccdc28b	0.328237	0.548236	0.22	Ccdc28b
Tigd5	0	0.219451	0.219451	Tigd5
Ccdc61	0.117263	0.336668	0.219404	Ccdc61
Slc25a17	0.215143	0.434461	0.219318	Slc25a17
Rrp1	0.897717	1.11656	0.218841	Rrp1
Tctex1d2	0.0806674	0.2993	0.218632	Tctex1d2
Neu1	0.224546	0.442715	0.218169	Neu1
Bri3	1.4229	1.64074	0.217836	Bri3
Vps54	0.112715	0.330533	0.217818	Vps54
Invs	0.0531695	0.270934	0.217764	Invs
Fsd1l	0.00766018	0.224837	0.217176	Fsd1l
Trim2	0.0472979	0.264321	0.217023	Trim2
Sgms2	0.310861	0.527651	0.21679	Sgms2
Ndufb7	1.18736	1.40397	0.216606	Ndufb7
Magohb	0.157236	0.373703	0.216467	Magohb
Nisch	0.746401	0.962646	0.216245	Nisch
Krt10	0.0317218	0.247925	0.216203	Krt10
Ing1	0.426145	0.642232	0.216087	Ing1
Ostf1	1.55123	1.76704	0.215805	Ostf1
Slc30a9	0.467428	0.683006	0.215577	Slc30a9
Hspb1	2.35203	2.5676	0.215564	Hspb1
Taz	0.317777	0.5331	0.215322	Taz
Sar1a	0.742006	0.957176	0.21517	Sar1a
Zer1	0.0185452	0.233639	0.215094	Zer1
Arpc3	1.57008	1.78516	0.215084	Arpc3
Gm11361	0.233609	0.448533	0.214923	Gm11361
Coq2	0.346069	0.560741	0.214672	Coq2
Mien1	0.61154	0.826136	0.214596	Mien1
Tpgs2	0.39696	0.611078	0.214118	Tpgs2
Alg5	0.232974	0.446836	0.213862	Alg5
Fam234a	0.102166	0.315731	0.213565	Fam234a
Cisd2	0.677949	0.891417	0.213468	Cisd2
Ptpn12	0.332558	0.54562	0.213062	Ptpn12
Vps37b	0.18864	0.401511	0.212871	Vps37b
Ccdc174	0.356806	0.569381	0.212575	Ccdc174
Gstm2	0.192186	0.404705	0.212519	Gstm2
Gm10073	0.466149	0.678505	0.212356	Gm10073
Nprl2	0.145383	0.357571	0.212188	Nprl2
Mvb12b	0.0375342	0.249448	0.211914	Mvb12b
Pygo2	0.0433314	0.254978	0.211647	Pygo2
Spef1	0.0133717	0.225009	0.211637	Spef1
Lzic	0.0941563	0.305776	0.21162	Lzic
Cwc22	0.0305092	0.242116	0.211607	Cwc22
Ocel1	0.270075	0.481585	0.21151	Ocel1
Rpl10a	1.8649	2.07618	0.211277	Rpl10a
Hs6st1	0	0.211242	0.211242	Hs6st1
Zfp37	0.0533615	0.26453	0.211168	Zfp37
Mmrn2	0.968316	1.1793	0.210983	Mmrn2
Mrpl2	0.228915	0.439626	0.210711	Mrpl2
Psme3	0.206287	0.416771	0.210484	Psme3
Ercc3	0.0752599	0.285596	0.210337	Ercc3
Ank	0.0761262	0.286459	0.210333	Ank
Dnajb4	0.270771	0.480547	0.209776	Dnajb4
Tsnax	0.602213	0.81192	0.209707	Tsnax
Rbm12b2	0	0.209616	0.209616	Rbm12b2
Sox9	0.0255118	0.235091	0.209579	Sox9
Zpr1	0.191892	0.401297	0.209405	Zpr1
Omg	0	0.209375	0.209375	Omg
Taf12	0.299405	0.5087	0.209295	Taf12
Rb1	0.0909054	0.300054	0.209148	Rb1
Fbxl6	0.304935	0.513854	0.208919	Fbxl6
Clu	1.01086	1.21959	0.208724	Clu
Prmt2	0.19779	0.40631	0.20852	Prmt2
Cul3	0.124876	0.333345	0.208469	Cul3
Myl12b	2.2779	2.48607	0.208166	Myl12b
Pdlim2	0.226038	0.434173	0.208135	Pdlim2
Tma16	0.0285935	0.23671	0.208116	Tma16
Creld2	0.165897	0.37376	0.207863	Creld2
Rfxap	0.135056	0.342909	0.207853	Rfxap
Rnpepl1	0.681543	0.889254	0.20771	Rnpepl1
Prkrip1	0.310016	0.517563	0.207547	Prkrip1
Faim	0.925471	1.13295	0.207483	Faim
Smagp	0.840588	1.04792	0.207329	Smagp
Tmem50b	0.106431	0.313716	0.207285	Tmem50b
Polr3c	0.0829143	0.290152	0.207238	Polr3c
Skida1	0.173088	0.380244	0.207156	Skida1
Arhgef9	0	0.207118	0.207118	Arhgef9
Creb3l2	0.186291	0.393295	0.207004	Creb3l2
Pik3r3	0.158486	0.365357	0.206871	Pik3r3
Babam1	0.515637	0.722489	0.206853	Babam1
Becn1	0.624633	0.831204	0.206571	Becn1
Rpl7	2.39647	2.60282	0.20635	Rpl7
Srxn1	0.0909155	0.297248	0.206332	Srxn1
Uqcrc1	0.886985	1.09305	0.206063	Uqcrc1
Dll4	0.467492	0.673138	0.205646	Dll4
Alyref2	0.0875933	0.293202	0.205608	Alyref2
Gm47283	0.0401664	0.24562	0.205454	Gm47283
Ube2l6	0.456758	0.66203	0.205272	Ube2l6
Ciao1	0.301969	0.507125	0.205157	Ciao1
Rtn4	0.822024	1.02705	0.205022	Rtn4
Il4ra	0.0651198	0.269952	0.204832	Il4ra
Eef1a2	0	0.204451	0.204451	Eef1a2
Nos3	0.526973	0.731414	0.204441	Nos3
Wbp1l	0.226677	0.431097	0.204421	Wbp1l
Snf8	0.685772	0.889886	0.204115	Snf8
Prdx5	0.583163	0.787077	0.203914	Prdx5
Srcap	0.0699608	0.273762	0.203801	Srcap
Ly6c1	3.86852	4.07227	0.203751	Ly6c1
Eif2b2	0.116857	0.320558	0.203701	Eif2b2
Cpsf7	0.133842	0.337537	0.203695	Cpsf7
Phf2	0.109492	0.312979	0.203487	Phf2
Hlx	0.28676	0.490155	0.203395	Hlx
Haus8	0	0.203065	0.203065	Haus8
Mrpl41	0.60622	0.809186	0.202966	Mrpl41
Park7	1.57704	1.77998	0.202939	Park7
Abraxas2	0.437817	0.640609	0.202792	Abraxas2
Sri	1.44029	1.64304	0.202752	Sri
Ppp1cb	1.22745	1.43001	0.202562	Ppp1cb
Birc3	0.0422606	0.244696	0.202435	Birc3
Tor1b	0.146758	0.349179	0.202421	Tor1b
Usp18	0.286978	0.489351	0.202374	Usp18
Eno1b	0.120953	0.323289	0.202337	Eno1b
Hax1	0.414779	0.617026	0.202247	Hax1
Acsl6	0	0.202018	0.202018	Acsl6
Ska2	0.0733484	0.275354	0.202006	Ska2
Irf3	0.377815	0.579684	0.201869	Irf3
Napb	0.175667	0.377498	0.201831	Napb
Dnajc30	0.300224	0.502047	0.201823	Dnajc30
Cep131	0.0202271	0.221953	0.201726	Cep131
Dnajc27	0.0787203	0.280311	0.20159	Dnajc27
Mapk3	1.29869	1.50025	0.201559	Mapk3
Cdr2l	0.0408559	0.242316	0.20146	Cdr2l
Slc20a1	0.0133717	0.214745	0.201374	Slc20a1
Tbcb	0.825748	1.02709	0.201338	Tbcb
Chst1	0	0.201275	0.201275	Chst1
Pcsk2	0	0.200978	0.200978	Pcsk2
Rnf146	0.450297	0.651216	0.20092	Rnf146
Tor2a	0.241364	0.442056	0.200692	Tor2a
Lmcd1	0.305556	0.506218	0.200662	Lmcd1
Ddost	0.551667	0.75228	0.200613	Ddost
Usp24	0.0715421	0.271869	0.200327	Usp24
Smim19	0.315133	0.515418	0.200285	Smim19
Trappc13	0.191226	0.391481	0.200255	Trappc13
Gltp	0.929878	1.13007	0.200191	Gltp
Whamm	0.0174052	0.217508	0.200103	Whamm
Pla2g4a	0.197357	0.397249	0.199892	Pla2g4a
Btg3	0.399063	0.598616	0.199553	Btg3
Tmem59l	0.0415508	0.240881	0.19933	Tmem59l
Tsen34	0.84121	1.04017	0.198962	Tsen34
Magoh	0.529791	0.728629	0.198839	Magoh
Stx5a	0.47783	0.676645	0.198815	Stx5a
Slc22a17	0	0.19861	0.19861	Slc22a17
Uqcc3	0.857947	1.05655	0.198603	Uqcc3
Mapkapk2	0.117648	0.31591	0.198262	Mapkapk2
Adamtsl4	0	0.198252	0.198252	Adamtsl4
Ube2e3	0.684096	0.882262	0.198166	Ube2e3
Gsta4	1.6993	1.89741	0.19811	Gsta4
Fastk	0.21033	0.408245	0.197914	Fastk
Sugt1	0.610887	0.808791	0.197904	Sugt1
Suv39h1	0.0469052	0.244783	0.197878	Suv39h1
Mmadhc	0.25197	0.449644	0.197674	Mmadhc
Sco2	0.121606	0.319188	0.197582	Sco2
Sucla2	0.605724	0.803301	0.197577	Sucla2
Acot8	0.0970689	0.29463	0.197561	Acot8
Klhl2	0.260485	0.457574	0.197089	Klhl2
Rpl34	2.71408	2.91114	0.197058	Rpl34
Hsp90ab1	2.23118	2.42822	0.197046	Hsp90ab1
Ell	0.0515487	0.248262	0.196713	Ell
Fam185a	0	0.196312	0.196312	Fam185a
Mterf3	0.214769	0.410922	0.196153	Mterf3
Nop10	0.955469	1.1515	0.196035	Nop10
A4galt	0.275852	0.471757	0.195905	A4galt
Fmnl3	0.541757	0.737625	0.195868	Fmnl3
Tmed7	0.460423	0.65628	0.195858	Tmed7
Sp140	0	0.195791	0.195791	Sp140
Fkbp14	0	0.195516	0.195516	Fkbp14
Glyr1	0.520831	0.716345	0.195513	Glyr1
Uhrf2	0.349125	0.544635	0.195511	Uhrf2
S100a1	1.00289	1.19839	0.195501	S100a1
Uckl1	0.134149	0.329648	0.195499	Uckl1
Galnt18	0.219429	0.414822	0.195393	Galnt18
Zhx3	0.178231	0.373623	0.195392	Zhx3
Smim11	0.80966	1.00504	0.195383	Smim11
Gm10131	0.00766018	0.20288	0.19522	Gm10131
Mus81	0.0923504	0.287526	0.195176	Mus81
2210016L21Rik	0.410117	0.605062	0.194945	2210016L21Rik
Tsc22d4	0.203196	0.398082	0.194886	Tsc22d4
Rps14	3.32002	3.51472	0.194701	Rps14
Snhg12	0.134076	0.328603	0.194527	Snhg12
2610035D17Rik	0.0910052	0.285521	0.194516	2610035D17Rik
Zfp707	0.140128	0.334637	0.194509	Zfp707
Pusl1	0.140138	0.334575	0.194437	Pusl1
Znfx1	0.124583	0.318643	0.19406	Znfx1
Dxo	0.119067	0.313009	0.193942	Dxo
Cep89	0.110953	0.30489	0.193937	Cep89
Otud4	0.0958553	0.28956	0.193705	Otud4
Adck5	0.0255118	0.21916	0.193648	Adck5
Ythdf3	0.050905	0.244489	0.193584	Ythdf3
Mrpl46	0.200302	0.39386	0.193558	Mrpl46
Grrp1	1.25928	1.45276	0.19348	Grrp1
Rack1	1.25449	1.44753	0.193041	Rack1
Sars	0.355215	0.548235	0.193021	Sars
Gm15013	0.0185431	0.211235	0.192692	Gm15013
Apod	0.604151	0.796718	0.192567	Apod
Tpra1	0.723304	0.915869	0.192565	Tpra1
Ndufb6	0.783888	0.976261	0.192373	Ndufb6
Cd59a	0.915411	1.10771	0.192298	Cd59a
Mettl3	0.0808799	0.27305	0.19217	Mettl3
Slc7a5	1.93115	2.12332	0.192167	Slc7a5
Srbd1	0.123139	0.315206	0.192067	Srbd1
Fam168b	0.274319	0.466313	0.191994	Fam168b
Galnt15	0.209542	0.401529	0.191986	Galnt15
Ppp1r13b	0.254895	0.446862	0.191967	Ppp1r13b
Cmpk2	0.201303	0.393165	0.191862	Cmpk2
Cep57	0.306682	0.498275	0.191593	Cep57
Cog8	0.241614	0.433174	0.19156	Cog8
Zfp157	0.0718337	0.263322	0.191489	Zfp157
Shc1	0.301556	0.492941	0.191385	Shc1
Gm46430	0.240303	0.431248	0.190945	Gm46430
Magi1	0	0.19093	0.19093	Magi1
Rtraf	0.947092	1.13792	0.190826	Rtraf
Phkg1	0	0.190722	0.190722	Phkg1
Trpt1	0.0915468	0.282144	0.190597	Trpt1
Yipf3	0.44965	0.640176	0.190526	Yipf3
Rpl7l1	0.463074	0.65355	0.190476	Rpl7l1
Golph3l	0.0850686	0.275498	0.190429	Golph3l
Asf1a	0.442341	0.632745	0.190404	Asf1a
Aup1	0.343468	0.53386	0.190392	Aup1
Naa30	0.0874885	0.27772	0.190232	Naa30
Cnih2	0	0.189451	0.189451	Cnih2
Ccdc167	0.123173	0.312594	0.18942	Ccdc167
Tor1a	0.193342	0.382728	0.189386	Tor1a
Rad51d	0.113487	0.30283	0.189343	Rad51d
Trappc5	0.361843	0.551137	0.189293	Trappc5
Zfp287	0.0253078	0.2146	0.189292	Zfp287
Ndufa5	1.07233	1.26159	0.189263	Ndufa5
Mrps9	0.152906	0.34216	0.189254	Mrps9
Actr3	0.985088	1.17414	0.189053	Actr3
Notum	0.612011	0.801	0.188989	Notum
Snrpe	1.10097	1.28993	0.188961	Snrpe
B4galt1	0.0985983	0.287459	0.188861	B4galt1
Anapc13	0.795502	0.98415	0.188648	Anapc13
Timm8b	0.729961	0.918487	0.188526	Timm8b
Kiz	0.11277	0.301241	0.188471	Kiz
Nrros	0.0538127	0.242245	0.188432	Nrros
Hpca	0	0.188412	0.188412	Hpca
Stk32c	0	0.188412	0.188412	Stk32c
Prkcb	0.0684175	0.256192	0.187775	Prkcb
Gm42722	0	0.187684	0.187684	Gm42722
Tgs1	0.179307	0.366784	0.187477	Tgs1
Atp6v0e	1.35847	1.54578	0.187309	Atp6v0e
Pole3	0.385536	0.572641	0.187105	Pole3
Dnajc5	0.58841	0.775477	0.187066	Dnajc5
Sra1	0.543435	0.730446	0.187012	Sra1
Fahd2a	0.0580447	0.245044	0.187	Fahd2a
Oxa1l	0.577077	0.763889	0.186812	Oxa1l
Cdk20	0.0202271	0.206965	0.186738	Cdk20
Zyx	0.102638	0.28933	0.186692	Zyx
Enoph1	0.158736	0.345394	0.186659	Enoph1
Rps16	2.90584	3.0924	0.18656	Rps16
Rnf220	0.269727	0.456175	0.186447	Rnf220
Ipo5	0.0244838	0.210217	0.185733	Ipo5
Psmg3	0.147583	0.333227	0.185644	Psmg3
Zfp553	0.15503	0.340665	0.185635	Zfp553
Zfp85	0	0.185568	0.185568	Zfp85
Hist3h2a	0.631557	0.81701	0.185453	Hist3h2a
Sdf2	0.383881	0.569304	0.185424	Sdf2
Fadd	0.0724386	0.257493	0.185055	Fadd
Sugp2	0.0917052	0.276652	0.184947	Sugp2
1110008F13Rik	0.545091	0.729594	0.184503	1110008F13Rik
Lyl1	0.348808	0.53326	0.184453	Lyl1
Colgalt2	0.14658	0.331002	0.184422	Colgalt2
Rtn1	0.066181	0.25055	0.184369	Rtn1
Prep	0.154806	0.339088	0.184282	Prep
Polr2f	0.929072	1.11329	0.184219	Polr2f
Btg1	0.853279	1.03738	0.184103	Btg1
Tmem65	0.316211	0.500279	0.184068	Tmem65
Flnb	0.716568	0.90063	0.184062	Flnb
Rnf145	0.13785	0.321858	0.184008	Rnf145
Gcsh	0.338428	0.522192	0.183765	Gcsh
Olfm2	0	0.183738	0.183738	Olfm2
Hddc2	0.280827	0.464381	0.183554	Hddc2
Snrpd1	0.563967	0.747445	0.183477	Snrpd1
Zscan29	0	0.183103	0.183103	Zscan29
Rnf167	0.511621	0.694589	0.182967	Rnf167
Il18bp	0.0208917	0.203841	0.182949	Il18bp
Ncln	0.287204	0.470096	0.182892	Ncln
Cs	0.303716	0.486343	0.182626	Cs
Smarcc2	0.430964	0.613534	0.18257	Smarcc2
Tbc1d14	0.415204	0.597701	0.182496	Tbc1d14
Abcd4	0.126839	0.309333	0.182494	Abcd4
Psme2	0.880284	1.06259	0.182304	Psme2
Ptges	0.0579879	0.240173	0.182185	Ptges
Rpl18a	3.1604	3.34252	0.182123	Rpl18a
Dhx36	0.199429	0.38154	0.182111	Dhx36
Mtpn	0.484636	0.666666	0.18203	Mtpn
Cryl1	0.0260652	0.208077	0.182011	Cryl1
Nol7	1.12829	1.31029	0.181997	Nol7
Atxn7l3	0.00766018	0.189582	0.181922	Atxn7l3
Il15ra	0.143701	0.325472	0.181772	Il15ra
Morc3	0.116097	0.297667	0.181571	Morc3
Atox1	2.68288	2.86394	0.181063	Atox1
Tbx1	0.449765	0.63063	0.180864	Tbx1
Commd3	0.665717	0.84645	0.180733	Commd3
Aifm1	0.172522	0.353233	0.180711	Aifm1
Inppl1	0.150914	0.331552	0.180638	Inppl1
Igsf5	0.215341	0.395948	0.180607	Igsf5
Bhlhe40	0.42276	0.603272	0.180512	Bhlhe40
Polr1d	0.984685	1.16516	0.180471	Polr1d
Gja1	0.216237	0.396708	0.18047	Gja1
Arhgap21	0.0508156	0.230841	0.180026	Arhgap21
Lims2	1.4476	1.6275	0.179892	Lims2
Map3k11	0.281085	0.460536	0.179451	Map3k11
Avpi1	0.346204	0.525596	0.179392	Avpi1
Homer3	0.10038	0.27946	0.17908	Homer3
Gusb	0.299259	0.478305	0.179046	Gusb
Hectd4	0.0133717	0.192409	0.179037	Hectd4
Gipc1	0.331178	0.510206	0.179029	Gipc1
Hdlbp	0.526567	0.705517	0.17895	Hdlbp
Ak4	0.0179876	0.196897	0.178909	Ak4
S100a11	1.44516	1.62393	0.178766	S100a11
Wdr83	0.203676	0.382419	0.178743	Wdr83
Psma4	0.944178	1.12284	0.178666	Psma4
Alkbh2	0.104191	0.282807	0.178616	Alkbh2
Desi1	0.239816	0.418222	0.178406	Desi1
Fam32a	0.869393	1.04775	0.178355	Fam32a
Tnks2	0.230301	0.408605	0.178303	Tnks2
Prkab2	0	0.178282	0.178282	Prkab2
Rpl8	2.60363	2.78176	0.178129	Rpl8
Prkd3	0.291594	0.469676	0.178083	Prkd3
Crem	0.416926	0.594671	0.177745	Crem
Aplp1	0.251443	0.429094	0.177651	Aplp1
Zbtb24	0.0655321	0.243001	0.177469	Zbtb24
Ubxn8	0.124628	0.302026	0.177399	Ubxn8
Mpdu1	0.164507	0.341782	0.177275	Mpdu1
Lcmt1	0.500568	0.677754	0.177186	Lcmt1
Serp2	0.212692	0.389818	0.177125	Serp2
Ralbp1	1.01596	1.19295	0.176986	Ralbp1
Mid1ip1	0.228546	0.405127	0.17658	Mid1ip1
Ly6e	3.04956	3.22599	0.176432	Ly6e
Atp6v0a1	0.1408	0.317153	0.176353	Atp6v0a1
Thoc3	0.26072	0.437024	0.176304	Thoc3
Miip	0.127503	0.303679	0.176176	Miip
Atp6v1h	0.362007	0.538019	0.176012	Atp6v1h
Fam219b	0.585698	0.761675	0.175976	Fam219b
Dnajc19	0.63324	0.809106	0.175866	Dnajc19
Dusp12	0.0895135	0.265294	0.175781	Dusp12
Cutc	0.0817219	0.257298	0.175576	Cutc
Snrnp40	0.443364	0.61884	0.175476	Snrnp40
Ints2	0.0154251	0.19085	0.175425	Ints2
Med27	0.0804727	0.255878	0.175405	Med27
Ppp2r5c	0.378545	0.553925	0.17538	Ppp2r5c
Vegfc	0.423691	0.598902	0.175211	Vegfc
Creld1	0.201053	0.3762	0.175147	Creld1
E330009J07Rik	0	0.175039	0.175039	E330009J07Rik
Gm6525	0.160594	0.335633	0.175039	Gm6525
Rbfox1	0	0.174996	0.174996	Rbfox1
Nmnat2	0	0.174996	0.174996	Nmnat2
Grin1	0	0.174996	0.174996	Grin1
Ano3	0	0.174996	0.174996	Ano3
Lamp5	0	0.174996	0.174996	Lamp5
Vstm2l	0	0.174996	0.174996	Vstm2l
Syp	0	0.174996	0.174996	Syp
Gabbr2	0	0.174996	0.174996	Gabbr2
Epb41l4b	0	0.174996	0.174996	Epb41l4b
Sgip1	0	0.174996	0.174996	Sgip1
Lrrtm4	0	0.174996	0.174996	Lrrtm4
Kcna1	0	0.174996	0.174996	Kcna1
Grin2b	0	0.174996	0.174996	Grin2b
Sv2b	0	0.174996	0.174996	Sv2b
Ppfia2	0	0.174996	0.174996	Ppfia2
B4galnt1	0	0.174996	0.174996	B4galnt1
Rarb	0	0.174996	0.174996	Rarb
Slitrk1	0	0.174996	0.174996	Slitrk1
Diras2	0	0.174996	0.174996	Diras2
Rab5b	0.457049	0.631859	0.174811	Rab5b
Smad6	0.189393	0.363938	0.174545	Smad6
Trappc1	0.55219	0.726719	0.174529	Trappc1
Bola1	0.410505	0.585029	0.174524	Bola1
Rtcb	0.670664	0.845161	0.174496	Rtcb
Rabl3	0.0229708	0.197414	0.174443	Rabl3
Immp1l	0.458073	0.6325	0.174427	Immp1l
Hdhd2	0.36965	0.544013	0.174362	Hdhd2
Ppib	1.45634	1.63059	0.174248	Ppib
Zfp383	0.0645736	0.23866	0.174086	Zfp383
Emc2	0.709309	0.883378	0.174069	Emc2
B230312C02Rik	0.02754	0.201495	0.173955	B230312C02Rik
Tomm7	1.55194	1.7258	0.173854	Tomm7
Eef1b2	1.213	1.38674	0.17374	Eef1b2
Crip2	2.72807	2.90174	0.173674	Crip2
Ppp4r1	0.0890357	0.262618	0.173583	Ppp4r1
Tmem126a	0.244215	0.417562	0.173347	Tmem126a
Med21	0.459833	0.633149	0.173316	Med21
Vsig2	0.0682578	0.241556	0.173298	Vsig2
Ccdc85c	0.0820704	0.255338	0.173267	Ccdc85c
Iah1	0.264065	0.437315	0.17325	Iah1
Pkig	1.14299	1.31611	0.173122	Pkig
Fance	0.114801	0.287786	0.172985	Fance
Vta1	0.211453	0.38438	0.172927	Vta1
Lamb2	0.837723	1.01041	0.172691	Lamb2
Osbpl2	0.222327	0.394902	0.172575	Osbpl2
Cep57l1	0.0486953	0.221251	0.172556	Cep57l1
4930481A15Rik	0.0442186	0.216767	0.172548	4930481A15Rik
Sec61b	1.06307	1.23549	0.172419	Sec61b
Arl5a	0.0966538	0.2689	0.172246	Arl5a
Tmem167b	0.312942	0.485118	0.172176	Tmem167b
Rfc4	0	0.172092	0.172092	Rfc4
Klkb1	0.00766018	0.179698	0.172038	Klkb1
Fut11	0.19565	0.367563	0.171912	Fut11
Csnk1g3	0.152186	0.323994	0.171808	Csnk1g3
Kpna3	0.117431	0.289165	0.171734	Kpna3
Agap3	0.0405509	0.21228	0.171729	Agap3
Rab8b	0.0688841	0.240426	0.171542	Rab8b
Ripor1	0.548209	0.719632	0.171424	Ripor1
Slc37a3	0.0655755	0.236981	0.171405	Slc37a3
Tmem64	0.168722	0.340046	0.171324	Tmem64
Gm14296	0.111676	0.282837	0.171161	Gm14296
Fam117b	0.109613	0.280695	0.171082	Fam117b
Strbp	0.0893337	0.260387	0.171053	Strbp
Rgl2	0.592313	0.763349	0.171036	Rgl2
Tspan9	0.473707	0.644584	0.170876	Tspan9
Zfp933	0.0300374	0.200708	0.170671	Zfp933
Gfap	0	0.170488	0.170488	Gfap
Atxn7l1	0.0304576	0.200823	0.170365	Atxn7l1
Aurkaip1	0.798057	0.96836	0.170303	Aurkaip1
Tgds	0.0727082	0.24289	0.170182	Tgds
Lasp1	0.658722	0.828778	0.170056	Lasp1
Mrpl24	0.425404	0.595309	0.169905	Mrpl24
Dbi	1.72625	1.89606	0.169814	Dbi
Tsc22d2	0.213632	0.383352	0.16972	Tsc22d2
Slc7a10	0	0.169489	0.169489	Slc7a10
Smurf1	0.0613552	0.230819	0.169463	Smurf1
Lipa	0.398464	0.567868	0.169404	Lipa
Ifi203	0.180383	0.349688	0.169304	Ifi203
Clpb	0.12771	0.296908	0.169198	Clpb
Pcmtd1	1.3861	1.55527	0.169168	Pcmtd1
Atp9a	0	0.169106	0.169106	Atp9a
Kctd17	0.0721008	0.241144	0.169043	Kctd17
Nphp1	0.0601824	0.229226	0.169043	Nphp1
Hacd4	0.062874	0.231901	0.169027	Hacd4
Mmp15	0.0910254	0.260025	0.169	Mmp15
Wfdc1	1.86391	2.03279	0.168878	Wfdc1
Terf2ip	0.259484	0.428288	0.168803	Terf2ip
Gramd1b	0.0202271	0.189012	0.168785	Gramd1b
Cops7a	0.532508	0.70121	0.168702	Cops7a
Lrrc47	0.211523	0.380167	0.168644	Lrrc47
Ubp1	0.043592	0.212116	0.168524	Ubp1
Gm14391	0	0.168442	0.168442	Gm14391
Hcfc1r1	0.891841	1.06017	0.168327	Hcfc1r1
Pinx1	0.0432429	0.211539	0.168296	Pinx1
Pcbp1	0.715681	0.883908	0.168227	Pcbp1
Mff	1.04895	1.2168	0.167854	Mff
Bach1	0.101867	0.269403	0.167536	Bach1
Rps2	2.28021	2.44766	0.167455	Rps2
Psmb3	1.40514	1.57252	0.16738	Psmb3
Tmed5	0.663056	0.830339	0.167283	Tmed5
Rpl9	1.16628	1.33353	0.167247	Rpl9
Sgsm2	0.0209305	0.18808	0.16715	Sgsm2
Adi1	0.0261531	0.193233	0.16708	Adi1
Icmt	0.0334468	0.200273	0.166826	Icmt
Tnip2	0.225835	0.392625	0.16679	Tnip2
Prorsd1	0.305902	0.472687	0.166785	Prorsd1
Znhit1	0.484614	0.651272	0.166658	Znhit1
Wdr5	0.137812	0.304432	0.16662	Wdr5
Slc20a2	0.0987503	0.265302	0.166552	Slc20a2
Fam3c	0.377707	0.544168	0.166461	Fam3c
Gtf3c2	0.221964	0.388391	0.166427	Gtf3c2
Mrps18c	0.556748	0.723148	0.1664	Mrps18c
2310040G24Rik	0.00766018	0.173995	0.166335	2310040G24Rik
Snx16	0.129462	0.295755	0.166293	Snx16
Sdcbp	1.26049	1.42671	0.166214	Sdcbp
Bcan	0	0.166141	0.166141	Bcan
Phyh	0.305133	0.470987	0.165855	Phyh
Sppl3	0.0602811	0.226002	0.165721	Sppl3
Pear1	0.291206	0.456904	0.165698	Pear1
Vdac1	0.607437	0.772826	0.165388	Vdac1
Srarp	1.50078	1.66617	0.165387	Srarp
Ddx3x	0.641129	0.806515	0.165386	Ddx3x
Gpr4	0.624799	0.790149	0.16535	Gpr4
Gm11713	0.0920721	0.257388	0.165316	Gm11713
Stard8	0.381343	0.546524	0.165181	Stard8
Slc39a3	0.0626223	0.227799	0.165177	Slc39a3
Abca3	0.175171	0.34032	0.165149	Abca3
Rai14	0.331455	0.496503	0.165048	Rai14
Vstm2b	0.0540566	0.219101	0.165044	Vstm2b
Zfp101	0.108778	0.273725	0.164946	Zfp101
Tor1aip2	0.245523	0.410312	0.164789	Tor1aip2
Fam214b	0.135744	0.30043	0.164686	Fam214b
Scamp1	0.506232	0.67089	0.164658	Scamp1
Zfp976	0.05591	0.220318	0.164408	Zfp976
S1pr4	0.32047	0.484869	0.164399	S1pr4
Arf3	0.370227	0.534479	0.164253	Arf3
Dcun1d1	0.193005	0.357233	0.164227	Dcun1d1
Nudcd2	0.445884	0.610107	0.164223	Nudcd2
Tspan3	0.776653	0.940856	0.164203	Tspan3
1190007I07Rik	0.107132	0.271323	0.16419	1190007I07Rik
Cnot8	0.219247	0.383422	0.164175	Cnot8
Dennd3	0.180012	0.344099	0.164087	Dennd3
Kctd12	0.436311	0.600291	0.16398	Kctd12
Ccdc91	0.328873	0.492831	0.163958	Ccdc91
Cdk9	0.443239	0.607104	0.163865	Cdk9
Sgk1	0.674794	0.838584	0.16379	Sgk1
Afap1l1	1.31899	1.48255	0.16356	Afap1l1
Xbp1	0.996037	1.1594	0.16336	Xbp1
Banf1	0.688418	0.851749	0.163331	Banf1
St5	0.131413	0.294638	0.163225	St5
Ttyh1	0.149934	0.313108	0.163174	Ttyh1
Patz1	0.286803	0.449888	0.163085	Patz1
Fcgrt	1.9466	2.10968	0.163081	Fcgrt
Dpm3	1.17762	1.34069	0.163078	Dpm3
Lmf2	0.205749	0.368788	0.163039	Lmf2
Slc52a3	0.380517	0.543479	0.162962	Slc52a3
Mt2	1.65876	1.82171	0.162949	Mt2
Ptpru	0	0.162721	0.162721	Ptpru
Lppos	0.105988	0.268633	0.162645	Lppos
Gpaa1	0.159221	0.321835	0.162614	Gpaa1
Cnot9	0.0316729	0.194228	0.162555	Cnot9
Dohh	0.583275	0.745816	0.162541	Dohh
Rpl32	2.69543	2.85797	0.16254	Rpl32
Pcp4	0.130819	0.293355	0.162536	Pcp4
Meaf6	0.219686	0.382166	0.16248	Meaf6
Mrrf	0.119814	0.282277	0.162463	Mrrf
Gskip	0.228634	0.390993	0.162359	Gskip
A330009N23Rik	0.179735	0.341928	0.162193	A330009N23Rik
Dlc1	0.751252	0.913399	0.162146	Dlc1
Ankrd13a	0.290007	0.452119	0.162112	Ankrd13a
Sec61a1	0.445553	0.607435	0.161883	Sec61a1
Rexo4	0.0875597	0.249288	0.161728	Rexo4
Lrrc49	0.851646	1.01313	0.161486	Lrrc49
Rps12-ps3	1.21345	1.37491	0.161459	Rps12-ps3
Tmem259	0.268923	0.43038	0.161456	Tmem259
Stat5b	0.167092	0.32852	0.161429	Stat5b
Wdr11	0.033687	0.194996	0.161309	Wdr11
Dbr1	0.0948443	0.256131	0.161287	Dbr1
Pitpnb	0.474644	0.635538	0.160894	Pitpnb
Ybey	0.0601114	0.220863	0.160751	Ybey
Ehd2	0.587939	0.748424	0.160485	Ehd2
Srsf2	1.25432	1.41477	0.160449	Srsf2
A930028N01Rik	0.0796507	0.24005	0.160399	A930028N01Rik
Cnot7	0.312799	0.473193	0.160393	Cnot7
Agpat1	0.0185431	0.178754	0.160211	Agpat1
Macrod2	0.167545	0.327745	0.1602	Macrod2
Spg21	0.192782	0.352963	0.160181	Spg21
Eif3f	1.89131	2.05149	0.160177	Eif3f
Erh	0.546594	0.706739	0.160145	Erh
Tbc1d15	0.240725	0.400801	0.160076	Tbc1d15
Syngr2	0.543691	0.703757	0.160065	Syngr2
Terf1	0.4419	0.601918	0.160018	Terf1
Prss36	0	0.159988	0.159988	Prss36
Pak1ip1	0.676447	0.836398	0.159951	Pak1ip1
Gpatch11	0.223958	0.383736	0.159778	Gpatch11
Kifc3	0.531851	0.691515	0.159664	Kifc3
BC005624	0.682017	0.841667	0.159649	BC005624
Grsf1	0.0369266	0.196559	0.159632	Grsf1
Nup35	0.0603288	0.219797	0.159468	Nup35
Eva1a	0	0.159456	0.159456	Eva1a
Fam210a	0.147007	0.306459	0.159452	Fam210a
Glrx	0.192666	0.352097	0.159431	Glrx
Abtb1	0.230308	0.389678	0.15937	Abtb1
Arpc4	0.926495	1.08571	0.159218	Arpc4
Psmg4	0.431111	0.590327	0.159216	Psmg4
Gm17501	0.0133717	0.172557	0.159185	Gm17501
Zfp51	0.0909515	0.249961	0.159009	Zfp51
Mad1l1	0.0523673	0.211236	0.158869	Mad1l1
Ier3ip1	0.807495	0.966257	0.158763	Ier3ip1
Gadd45b	0.201891	0.360597	0.158706	Gadd45b
Rere	0.267803	0.426342	0.158539	Rere
Clcn7	0.0999264	0.258449	0.158523	Clcn7
Sh3bgrl	0.845316	1.0038	0.158487	Sh3bgrl
Chmp3	1.06292	1.22137	0.158455	Chmp3
Atp6v1f	1.30343	1.46179	0.158362	Atp6v1f
Sar1b	0.741703	0.899989	0.158286	Sar1b
Tmem214	0.337789	0.49606	0.158271	Tmem214
Selenom	1.47149	1.62962	0.158137	Selenom
Ndufs4	0.933031	1.09103	0.158001	Ndufs4
Zdhhc24	0.0772584	0.235252	0.157994	Zdhhc24
Ap2a2	0.396196	0.554152	0.157956	Ap2a2
2900011O08Rik	0	0.157897	0.157897	2900011O08Rik
Tceal3	0	0.157897	0.157897	Tceal3
Trpc4	0	0.157897	0.157897	Trpc4
Srgap3	0	0.157897	0.157897	Srgap3
Sf3b4	0.567261	0.725145	0.157884	Sf3b4
Fam241a	0.0400796	0.197764	0.157685	Fam241a
Rpl5	1.67792	1.83554	0.15762	Rpl5
2900097C17Rik	0.532415	0.689999	0.157584	2900097C17Rik
Bad	0.581844	0.739392	0.157548	Bad
Tmem170	0.0249337	0.182441	0.157507	Tmem170
Cnot3	0.381643	0.539145	0.157502	Cnot3
Dnpep	0.562241	0.719672	0.157431	Dnpep
Rpl37	3.07882	3.23625	0.157428	Rpl37
AI480526	0.0625427	0.21997	0.157427	AI480526
Csnk2b	0.723518	0.880892	0.157375	Csnk2b
Tipin	0.133341	0.290665	0.157325	Tipin
Ccdc71l	0.0391818	0.19648	0.157298	Ccdc71l
Psmb9	0.703823	0.861002	0.157179	Psmb9
Arhgap10	0.547793	0.704885	0.157092	Arhgap10
Rnf44	0.194257	0.351292	0.157034	Rnf44
Slit2	0.0179876	0.174996	0.157008	Slit2
Ttc38	0.0813021	0.238046	0.156744	Ttc38
Dusp8	0	0.156638	0.156638	Dusp8
Pa2g4	0.567618	0.724226	0.156608	Pa2g4
Rps11	2.44957	2.60601	0.156437	Rps11
Ccng2	0.291051	0.447438	0.156388	Ccng2
Golm1	0.147948	0.304312	0.156364	Golm1
Adgrb1	0.0186338	0.174996	0.156362	Adgrb1
Sptlc1	0.0814776	0.237791	0.156314	Sptlc1
Poll	0	0.156288	0.156288	Poll
Arfgap1	0.144808	0.301078	0.156269	Arfgap1
Nploc4	0.0434801	0.199667	0.156186	Nploc4
2310035C23Rik	0.195457	0.351617	0.15616	2310035C23Rik
Rnaseh1	0.13509	0.291156	0.156066	Rnaseh1
Ppp4c	0.689586	0.845542	0.155956	Ppp4c
Aimp2	0.114841	0.270735	0.155894	Aimp2
Fnta	0.761016	0.916888	0.155872	Fnta
Atp5h	1.91828	2.07404	0.155756	Atp5h
Chst11	0.0893262	0.245069	0.155743	Chst11
Eva1b	0.854444	1.01006	0.155611	Eva1b
Map2k1	0.22047	0.37602	0.15555	Map2k1
Eef2	2.02172	2.17727	0.155548	Eef2
Smo	0.109262	0.264794	0.155532	Smo
Mitd1	0.189926	0.345301	0.155375	Mitd1
Gfm1	0.0521688	0.20754	0.155372	Gfm1
Cat	0.47224	0.627581	0.15534	Cat
Yipf5	0.412966	0.56825	0.155284	Yipf5
Rps3a1	2.65036	2.80559	0.155231	Rps3a1
Mrfap1	1.47125	1.62641	0.155152	Mrfap1
Rpl26	2.89545	3.05056	0.155107	Rpl26
Aasdhppt	0.118416	0.273491	0.155076	Aasdhppt
Arfrp1	0.289229	0.444175	0.154947	Arfrp1
Pmvk	0.309834	0.464734	0.1549	Pmvk
0610037L13Rik	0.494505	0.649341	0.154836	0610037L13Rik
Erf	0.121365	0.276172	0.154806	Erf
Mfhas1	0.700947	0.855633	0.154686	Mfhas1
Sfxn5	0.109631	0.264305	0.154674	Sfxn5
Zfp598	0.130757	0.285415	0.154658	Zfp598
Tnip1	0.0733185	0.227832	0.154514	Tnip1
Cpne8	0.332266	0.486708	0.154442	Cpne8
Sumo2	1.81596	1.97037	0.154412	Sumo2
Carhsp1	0.309946	0.464346	0.154401	Carhsp1
Fopnl	0.2895	0.443791	0.154291	Fopnl
Snn	0.349202	0.503381	0.154179	Snn
Gps2	0.447325	0.60147	0.154145	Gps2
Bcl7b	0.399457	0.553458	0.154001	Bcl7b
Psmg2	0.20494	0.358912	0.153972	Psmg2
Cope	1.01074	1.16465	0.153908	Cope
Bcr	0	0.153887	0.153887	Bcr
Pop5	1.02984	1.1837	0.15386	Pop5
Dync2li1	0.0567356	0.210563	0.153827	Dync2li1
Dgat1	0.190359	0.344182	0.153824	Dgat1
Vps9d1	0.10834	0.262126	0.153786	Vps9d1
Dclk1	0	0.153775	0.153775	Dclk1
2610524H06Rik	0.0581498	0.211853	0.153703	2610524H06Rik
Mypopos	0.0133326	0.166733	0.1534	Mypopos
Glb1	0.0270626	0.180429	0.153366	Glb1
Psmb5	1.20215	1.3555	0.153355	Psmb5
Pank1	0.0229708	0.176315	0.153344	Pank1
Dnajc7	0.512911	0.666118	0.153207	Dnajc7
Rpl14	2.80798	2.96118	0.153192	Rpl14
Cab39	0.427994	0.580834	0.15284	Cab39
Etnk1	0.538285	0.691068	0.152783	Etnk1
Sec13	0.633856	0.786622	0.152766	Sec13
Azin1	0.405155	0.557911	0.152756	Azin1
Cltc	0.639024	0.791533	0.152509	Cltc
Gnl3l	0.0319594	0.18445	0.152491	Gnl3l
Zfp91	0.298861	0.45133	0.15247	Zfp91
Alpl	1.03936	1.19177	0.152405	Alpl
Ppp2r1a	0.569827	0.722094	0.152267	Ppp2r1a
Rpl24	2.43002	2.58228	0.152266	Rpl24
Ets1	1.35183	1.50382	0.151989	Ets1
Tpd52l1	0.683396	0.835379	0.151982	Tpd52l1
Map2k3	0.380922	0.53283	0.151908	Map2k3
Mob3b	0.290988	0.442724	0.151736	Mob3b
Sac3d1	0.252272	0.403892	0.15162	Sac3d1
Sin3a	0.140903	0.292462	0.151559	Sin3a
Tmem59	1.63968	1.79122	0.151541	Tmem59
Xndc1	0.0185452	0.170074	0.151529	Xndc1
Adcy4	0.580166	0.731691	0.151526	Adcy4
Zfp444	0.15085	0.302283	0.151433	Zfp444
Bcas3	0.0514731	0.202884	0.151411	Bcas3
Imp3	0.631447	0.782712	0.151265	Imp3
Mmp11	0	0.151173	0.151173	Mmp11
Cdkn2d	0.497934	0.649063	0.151129	Cdkn2d
Aebp2	0.101216	0.252317	0.151102	Aebp2
Gnb5	0.182539	0.333618	0.151079	Gnb5
Med11	0.10802	0.259029	0.151009	Med11
Dcaf12	0.210941	0.36195	0.151009	Dcaf12
Ascc1	0.190185	0.340971	0.150787	Ascc1
Chek2	0	0.150744	0.150744	Chek2
Aspscr1	0.700502	0.851242	0.15074	Aspscr1
Gas6	1.14534	1.29606	0.150721	Gas6
Usp5	0.226954	0.377586	0.150633	Usp5
Lurap1	0.0865993	0.237118	0.150519	Lurap1
Lgals4	0.134105	0.284557	0.150452	Lgals4
Ubxn6	0.617297	0.767627	0.15033	Ubxn6
Ramp2	2.42829	2.57857	0.150289	Ramp2
Pot1b	0.0251563	0.175437	0.150281	Pot1b
Zfp213	0.0133326	0.163602	0.15027	Zfp213
Amacr	0.0179877	0.168115	0.150128	Amacr
Ppp6c	0.187663	0.337762	0.150099	Ppp6c
Dcaf11	0.335267	0.485332	0.150065	Dcaf11
Rrs1	0.229588	0.379606	0.150018	Rrs1
Upf1	0.0756363	0.225598	0.149961	Upf1
Snx7	0.200173	0.350133	0.149959	Snx7
Ncdn	0.137505	0.28732	0.149814	Ncdn
Gm11423	0	0.149685	0.149685	Gm11423
Oser1	0.436586	0.586246	0.14966	Oser1
Rnf26	0.140057	0.289647	0.14959	Rnf26
0610010K14Rik	0.712396	0.861928	0.149533	0610010K14Rik
Tomm22	0.895498	1.04478	0.149277	Tomm22
Inpp4a	0.204568	0.353807	0.149238	Inpp4a
Prepl	0.0133717	0.162537	0.149165	Prepl
Rab11b	1.12324	1.2723	0.149066	Rab11b
Srgn	1.83298	1.98192	0.148941	Srgn
Ctss	0.0647301	0.21336	0.14863	Ctss
Abhd8	0.319111	0.467712	0.1486	Abhd8
Deaf1	0.183977	0.332554	0.148577	Deaf1
D3Ertd751e	0.274425	0.422951	0.148526	D3Ertd751e
Plod3	0.12024	0.268704	0.148464	Plod3
Rpl36	2.71582	2.86409	0.148268	Rpl36
Itm2a	3.94786	4.09605	0.14819	Itm2a
Fam193a	0.194757	0.342864	0.148107	Fam193a
Calm2	1.56139	1.70943	0.148038	Calm2
Egflam	0.0186338	0.166638	0.148005	Egflam
Clns1a	0.46642	0.614395	0.147975	Clns1a
Zdhhc6	0.315214	0.463183	0.14797	Zdhhc6
Rpusd4	0.150417	0.298269	0.147852	Rpusd4
Gatm	1.42282	1.57066	0.147842	Gatm
Trim16	0.354187	0.501987	0.1478	Trim16
Tyw1	0.156451	0.304236	0.147784	Tyw1
Lingo1	0.027247	0.174996	0.147749	Lingo1
Zmym1	0	0.147709	0.147709	Zmym1
Parp1	0.136964	0.284621	0.147657	Parp1
Rom1	0.0656166	0.213149	0.147533	Rom1
Adar	0.0869743	0.234315	0.147341	Adar
Zbtb14	0.211812	0.359101	0.14729	Zbtb14
Trem2	0.0154251	0.162621	0.147196	Trem2
Nip7	0.230418	0.377604	0.147186	Nip7
Spa17	0	0.146789	0.146789	Spa17
Isg20l2	0.0964604	0.243086	0.146625	Isg20l2
Mill2	0.249874	0.396432	0.146558	Mill2
Mdfic	0.053189	0.199729	0.14654	Mdfic
Eif3m	0.759743	0.906198	0.146455	Eif3m
Numa1	0.511143	0.657585	0.146443	Numa1
Naa10	0.232861	0.379256	0.146395	Naa10
Tsc22d1	3.21633	3.36272	0.146385	Tsc22d1
Ccdc124	0.719365	0.865622	0.146257	Ccdc124
Sdhd	0.591328	0.737568	0.14624	Sdhd
Mrnip	0.0480561	0.194264	0.146208	Mrnip
Rabif	0.0748383	0.221025	0.146187	Rabif
Cyth2	0.442188	0.588137	0.145948	Cyth2
Arl2	0.503393	0.649276	0.145882	Arl2
Wdr12	0.0949518	0.240567	0.145615	Wdr12
Xpo7	0.113901	0.25928	0.145379	Xpo7
Chn1	0.02754	0.172784	0.145243	Chn1
Pigv	0.0573365	0.202575	0.145238	Pigv
Pfkm	0.106051	0.251233	0.145182	Pfkm
Tmeff1	0.188652	0.333704	0.145053	Tmeff1
Cers2	0.504306	0.649335	0.145029	Cers2
Rasa1	0.435505	0.580342	0.144837	Rasa1
Tyrobp	0.098713	0.243493	0.14478	Tyrobp
Pafah1b2	0.610872	0.755611	0.144739	Pafah1b2
Rnf14	0.479957	0.624665	0.144709	Rnf14
Tmem167	0.592564	0.737221	0.144656	Tmem167
F3	0.0249041	0.169489	0.144584	F3
Ticam1	0	0.144465	0.144465	Ticam1
AU022252	0.0784922	0.222921	0.144429	AU022252
Txnl1	0.894853	1.03926	0.144408	Txnl1
Ech1	1.36641	1.51069	0.144289	Ech1
Rab22a	0.266995	0.411166	0.144171	Rab22a
Foxo1	0.567218	0.711382	0.144164	Foxo1
Cops5	0.546452	0.690604	0.144152	Cops5
Szrd1	0.258416	0.40255	0.144134	Szrd1
Tanc2	0.0253078	0.169374	0.144066	Tanc2
Dync1i2	0.816266	0.96028	0.144015	Dync1i2
Arrdc2	0.115554	0.259548	0.143993	Arrdc2
H3f3a	2.28929	2.43325	0.143957	H3f3a
Fxyd6	0.0430503	0.186973	0.143922	Fxyd6
Tbkbp1	0.311869	0.45579	0.143921	Tbkbp1
Gnl3	0.183165	0.327033	0.143868	Gnl3
Dchs1	0	0.143781	0.143781	Dchs1
Katnb1	0.0407553	0.184523	0.143768	Katnb1
Pms2	0.0850686	0.228753	0.143684	Pms2
Tfeb	0.368702	0.512377	0.143675	Tfeb
Zfpl1	0.283343	0.427015	0.143672	Zfpl1
Islr2	0	0.143471	0.143471	Islr2
Mllt6	0.391034	0.534447	0.143413	Mllt6
Sox18	1.60521	1.74861	0.143404	Sox18
Lrp5	0.236542	0.379907	0.143365	Lrp5
Mettl2	0.033687	0.177048	0.143361	Mettl2
Tex30	0.069387	0.21257	0.143183	Tex30
Atp5l	1.95098	2.09412	0.143134	Atp5l
BC031181	1.00132	1.1444	0.143084	BC031181
Borcs5	0	0.143046	0.143046	Borcs5
Parn	0.127465	0.270457	0.142992	Parn
Exosc2	0.0991021	0.241965	0.142863	Exosc2
AI987944	0.0937098	0.236572	0.142862	AI987944
Med9	0.313559	0.456349	0.14279	Med9
Atpaf1	0.103144	0.245909	0.142766	Atpaf1
Ptpra	0.697585	0.840285	0.1427	Ptpra
Gm6133	0.0711803	0.213839	0.142659	Gm6133
Mtx1	0.310281	0.452889	0.142608	Mtx1
4933427D14Rik	0.0133326	0.155902	0.14257	4933427D14Rik
Nbas	0	0.142467	0.142467	Nbas
Ndufb11	1.48141	1.62382	0.142403	Ndufb11
Pef1	0.214865	0.357229	0.142364	Pef1
Atg4c	0.0133326	0.155557	0.142224	Atg4c
Cops3	0.380943	0.523001	0.142059	Cops3
Dnaja2	0.741589	0.883624	0.142035	Dnaja2
Tmtc2	0.457929	0.599932	0.142003	Tmtc2
Sat1	0.79365	0.935611	0.14196	Sat1
Plekha2	0.208523	0.350464	0.141942	Plekha2
Rpl36a-ps1	0.763694	0.905636	0.141941	Rpl36a-ps1
Nabp2	0.395328	0.537193	0.141865	Nabp2
Med14	0.0496718	0.191417	0.141745	Med14
Cog2	0.106215	0.24796	0.141744	Cog2
Hsf1	0.206886	0.348629	0.141742	Hsf1
Sgk3	0.150719	0.292321	0.141602	Sgk3
Cmc2	0.221154	0.36266	0.141506	Cmc2
Tmem258	0.885596	1.02707	0.141474	Tmem258
Iigp1	0.404397	0.545701	0.141305	Iigp1
F11r	0.890618	1.03173	0.14111	F11r
Sephs2	0.245109	0.385825	0.140716	Sephs2
Psmd1	0.547449	0.688156	0.140707	Psmd1
Cdk7	0.158807	0.299343	0.140536	Cdk7
Prrg2	0.432104	0.572613	0.140509	Prrg2
Trnau1ap	0.56232	0.702655	0.140334	Trnau1ap
Gm26526	0.0407553	0.181084	0.140329	Gm26526
Gpn2	0	0.140227	0.140227	Gpn2
1110008P14Rik	0.316911	0.457094	0.140183	1110008P14Rik
Lyrm4	0.0415508	0.181694	0.140143	Lyrm4
Uba7	0.292258	0.432238	0.13998	Uba7
Auts2	0.230685	0.370557	0.139873	Auts2
Grpel1	0.801099	0.940915	0.139816	Grpel1
8430408G22Rik	0.563226	0.702775	0.139549	8430408G22Rik
Nt5c3b	0.247223	0.38665	0.139427	Nt5c3b
Pias3	0.204584	0.343987	0.139403	Pias3
Ttc33	0.285951	0.425313	0.139362	Ttc33
Rnf8	0.172653	0.311888	0.139234	Rnf8
Gadd45g	0.492781	0.632008	0.139227	Gadd45g
Sipa1l2	0.37695	0.516133	0.139183	Sipa1l2
Sertad3	0.284191	0.423241	0.13905	Sertad3
Fam212a	0.607295	0.746343	0.139048	Fam212a
Adarb1	0.0179876	0.156996	0.139008	Adarb1
Calm3	1.06181	1.20081	0.138998	Calm3
Eif2d	0.129306	0.26818	0.138874	Eif2d
Pantr1	0	0.138865	0.138865	Pantr1
Hectd3	0.0154251	0.154269	0.138843	Hectd3
Rhno1	0.0405173	0.179302	0.138785	Rhno1
Sod1	1.18465	1.32341	0.138758	Sod1
Lrsam1	0	0.138655	0.138655	Lrsam1
Nacc2	0.339662	0.478166	0.138504	Nacc2
Cnot6	0.469321	0.607818	0.138497	Cnot6
Rcor3	0.177675	0.316085	0.13841	Rcor3
Mrps24	0.915373	1.05372	0.13835	Mrps24
Sumo3	0.819167	0.957477	0.13831	Sumo3
Eid2b	0.111591	0.249714	0.138123	Eid2b
Alkbh7	0.0761205	0.214133	0.138012	Alkbh7
Tmem218	0.138961	0.276929	0.137969	Tmem218
Gm26910	0.0185431	0.156502	0.137959	Gm26910
Stk19	0.226998	0.364879	0.137881	Stk19
Akap7	0.142169	0.280041	0.137872	Akap7
Anln	0	0.137841	0.137841	Anln
Ilf2	0.593928	0.731765	0.137838	Ilf2
Zfp36	0.325306	0.463138	0.137832	Zfp36
Arl1	0.817939	0.955753	0.137814	Arl1
Atf5	0.0882836	0.225921	0.137637	Atf5
Igfbp7	3.30241	3.43988	0.137477	Igfbp7
Mrps21	1.22018	1.3575	0.137323	Mrps21
Stat2	0.339246	0.476545	0.137299	Stat2
Nfkbib	0.15334	0.290613	0.137272	Nfkbib
Map3k4	0.128135	0.265364	0.13723	Map3k4
Kctd11	0.0179876	0.155204	0.137217	Kctd11
Tubgcp2	0.285757	0.422945	0.137188	Tubgcp2
Upf3b	0.397696	0.534778	0.137081	Upf3b
C730034F03Rik	0	0.137011	0.137011	C730034F03Rik
Maip1	0.0731536	0.210133	0.136979	Maip1
Fn3krp	0	0.136905	0.136905	Fn3krp
Parp14	0.199292	0.336124	0.136832	Parp14
Pgpep1	0.203285	0.340055	0.13677	Pgpep1
Raf1	0.280635	0.417336	0.136701	Raf1
Rab11a	1.59979	1.73643	0.136636	Rab11a
Ndrg3	0.565859	0.70229	0.136431	Ndrg3
Aldoc	0.873981	1.0104	0.136415	Aldoc
Pnpt1	0.0548685	0.191136	0.136267	Pnpt1
Appl2	0.0966141	0.232696	0.136082	Appl2
Adam9	0.131207	0.267196	0.135989	Adam9
Acot2	0.0244838	0.160426	0.135942	Acot2
Znhit3	0.276658	0.412549	0.135891	Znhit3
Slc9a3r1	0.24207	0.377795	0.135725	Slc9a3r1
A630089N07Rik	0.0249337	0.160619	0.135685	A630089N07Rik
Mical1	0.424485	0.560138	0.135653	Mical1
Arhgef6	0.0152621	0.150885	0.135623	Arhgef6
Gtf2b	0.234607	0.370214	0.135607	Gtf2b
Zfp97	0	0.135471	0.135471	Zfp97
Tppp	0.0251563	0.160619	0.135462	Tppp
Gnb1	1.72318	1.85845	0.135274	Gnb1
Ldhb	0.397202	0.532423	0.13522	Ldhb
Rab28	0.657746	0.79287	0.135124	Rab28
Tpgs1	0.383073	0.51804	0.134967	Tpgs1
Pir	1.01021	1.14511	0.134896	Pir
Acadm	0.448117	0.582977	0.13486	Acadm
Dlst	0.144609	0.279454	0.134845	Dlst
Edc3	0.149376	0.28419	0.134814	Edc3
Alkbh6	0.437836	0.572628	0.134792	Alkbh6
Rfxank	0.104498	0.239245	0.134747	Rfxank
B230118H07Rik	0.418781	0.553469	0.134688	B230118H07Rik
N4bp1	0.365094	0.499778	0.134685	N4bp1
Psmd10	0.381678	0.516233	0.134554	Psmd10
Cdkl3	0.0427092	0.177168	0.134459	Cdkl3
Nop9	0.0849889	0.219414	0.134425	Nop9
Ndufa4	2.08541	2.21983	0.134413	Ndufa4
Foxc1	0.59483	0.729222	0.134393	Foxc1
Ppm1m	0.158845	0.292868	0.134022	Ppm1m
Tsg101	0.626656	0.760631	0.133975	Tsg101
Lpcat4	0.0255118	0.159483	0.133971	Lpcat4
Slc25a33	0.247915	0.381863	0.133948	Slc25a33
Tysnd1	0.0887554	0.222703	0.133947	Tysnd1
Aatk	0	0.133904	0.133904	Aatk
Ric8a	0.444455	0.578306	0.133851	Ric8a
Add1	0.509864	0.643674	0.13381	Add1
Slc5a6	0.0620571	0.195805	0.133748	Slc5a6
Mynn	0.352158	0.48579	0.133632	Mynn
Psmc3	1.04286	1.17645	0.133595	Psmc3
Polr2i	0.587165	0.720711	0.133546	Polr2i
Rplp0	2.41527	2.54879	0.133521	Rplp0
Sympk	0.0803701	0.213876	0.133505	Sympk
Papss1	0.416878	0.550142	0.133265	Papss1
Emc1	0.150927	0.284168	0.133242	Emc1
Mtx2	0.205245	0.338478	0.133233	Mtx2
Csde1	0.776896	0.910118	0.133222	Csde1
Dnajc25	0.0682696	0.201484	0.133215	Dnajc25
Scn1b	0.0133717	0.146437	0.133065	Scn1b
Flii	0.734317	0.867377	0.13306	Flii
Cop1	0.192806	0.325852	0.133046	Cop1
Gstm7	0.706075	0.838955	0.132881	Gstm7
Phospho2	0.107328	0.240183	0.132855	Phospho2
Sap30l	0.0679556	0.200803	0.132847	Sap30l
Kank1	0.0244838	0.157163	0.13268	Kank1
Med28	1.28683	1.41948	0.13265	Med28
Ppp4r3a	0.196427	0.328945	0.132518	Ppp4r3a
Camk2d	0.405861	0.538159	0.132298	Camk2d
Pus1	0.0780511	0.210344	0.132293	Pus1
Wdr37	0.256911	0.389159	0.132248	Wdr37
Idh1	0.118992	0.251136	0.132144	Idh1
Bscl2	0.273176	0.405183	0.132007	Bscl2
Sdhb	1.16525	1.29723	0.13198	Sdhb
Csrp1	0.930054	1.062	0.131946	Csrp1
Ubxn1	1.19183	1.32362	0.131788	Ubxn1
4632404H12Rik	0.0316729	0.163366	0.131693	4632404H12Rik
Higd2a	1.16189	1.29356	0.131676	Higd2a
Pdhx	0.06519	0.196804	0.131614	Pdhx
Foxo4	0.0345125	0.166103	0.13159	Foxo4
Lmo2	1.54251	1.67408	0.131566	Lmo2
Retreg3	0.545939	0.677497	0.131558	Retreg3
Washc1	0.324425	0.455979	0.131554	Washc1
Zfp937	0.182704	0.314216	0.131511	Zfp937
Sept4	0.880196	1.01163	0.131433	2022-09-04
Rnaseh2c	0.780163	0.911412	0.13125	Rnaseh2c
Stam2	0.283346	0.414552	0.131206	Stam2
Rcl1	0.165449	0.296654	0.131205	Rcl1
Pmaip1	0.249907	0.380994	0.131087	Pmaip1
Cog6	0.138659	0.269576	0.130917	Cog6
Cadm1	0.467399	0.59828	0.130881	Cadm1
Fancc	0	0.130845	0.130845	Fancc
Smim4	0.223778	0.354583	0.130804	Smim4
Ndufb4	1.31206	1.44279	0.130724	Ndufb4
Ddit3	0.160675	0.291384	0.130709	Ddit3
Scp2	1.2231	1.35375	0.130653	Scp2
Ddx17	0.660415	0.791013	0.130598	Ddx17
Eng	2.0423	2.17282	0.130512	Eng
Arl6ip4	0.406414	0.536872	0.130459	Arl6ip4
BC002059	0.0133717	0.143783	0.130411	BC002059
Eif5a	1.49077	1.62112	0.130353	Eif5a
Pbdc1	0.301414	0.431752	0.130338	Pbdc1
Cnpy4	0.130949	0.261265	0.130316	Cnpy4
Pold3	0.175825	0.306109	0.130284	Pold3
Frg2f1	0	0.130202	0.130202	Frg2f1
Aplf	0.0179876	0.148183	0.130195	Aplf
Wiz	0.0383093	0.168454	0.130145	Wiz
Agpat3	0.205521	0.335553	0.130032	Agpat3
Pus7	0.038198	0.168172	0.129974	Pus7
Cdc123	0.343422	0.473389	0.129967	Cdc123
Trim56	0.382227	0.512009	0.129782	Trim56
Itpr1	0.434592	0.564354	0.129762	Itpr1
Snap47	0.304722	0.434374	0.129652	Snap47
Arih2	0.10027	0.229892	0.129622	Arih2
Timm50	0.237989	0.367512	0.129524	Timm50
Fam114a1	0.167289	0.296792	0.129503	Fam114a1
Lsm12	0.12767	0.257132	0.129463	Lsm12
Fermt3	0	0.129459	0.129459	Fermt3
Pcbp2	1.36006	1.48942	0.129367	Pcbp2
Pgrmc1	0.88803	1.01739	0.129365	Pgrmc1
Smap1	0.700365	0.829701	0.129336	Smap1
Nol6	0.0334468	0.162555	0.129108	Nol6
Gm45069	0	0.12903	0.12903	Gm45069
Commd9	0.181311	0.310315	0.129004	Commd9
Slc41a1	0.105714	0.234676	0.128962	Slc41a1
St6gal1	0.243647	0.372596	0.128949	St6gal1
Hprt	1.37996	1.50881	0.128853	Hprt
Irf2bp2	0.156839	0.285667	0.128828	Irf2bp2
Nr2c2ap	0.347152	0.475965	0.128813	Nr2c2ap
Mrps7	0.405095	0.533857	0.128762	Mrps7
Foxf2	0.868031	0.99679	0.128759	Foxf2
Zfp787	0.447614	0.576336	0.128722	Zfp787
Cdh13	0.149983	0.278689	0.128706	Cdh13
Itsn1	0.0762468	0.2049	0.128653	Itsn1
Gng5	2.33444	2.46303	0.128585	Gng5
Ppp2r5b	0.0378577	0.16625	0.128393	Ppp2r5b
Selenok	2.05154	2.17993	0.128387	Selenok
Cetn3	1.20457	1.33295	0.128378	Cetn3
Rab26os	0.0253078	0.153673	0.128366	Rab26os
Hyal2	0.523753	0.651983	0.128231	Hyal2
Nap1l4	0.847353	0.975581	0.128228	Nap1l4
Tapbpl	0.379959	0.50794	0.127981	Tapbpl
Selenot	0.889109	1.01678	0.127667	Selenot
Gss	0.060518	0.188142	0.127624	Gss
Srpk1	0.408744	0.536336	0.127592	Srpk1
Blzf1	0.101734	0.229306	0.127572	Blzf1
Zap70	0.192122	0.319672	0.12755	Zap70
St13	0.784655	0.912167	0.127513	St13
Ola1	0.277904	0.40541	0.127506	Ola1
Ssr1	0.840486	0.967974	0.127487	Ssr1
Asap3	0.0428559	0.17028	0.127424	Asap3
Gstt3	0.0401664	0.167507	0.12734	Gstt3
Mobp	0.996054	1.12339	0.127337	Mobp
Grina	0.523405	0.650571	0.127165	Grina
Psmb2	1.25695	1.38409	0.127133	Psmb2
BC037034	0.0229708	0.149957	0.126986	BC037034
Adprm	0.162776	0.289677	0.126901	Adprm
Ttc9b	0	0.126846	0.126846	Ttc9b
Glo1	0.933923	1.06074	0.126819	Glo1
Npm1	1.29834	1.42513	0.126792	Npm1
Tet2	0.208721	0.335476	0.126755	Tet2
Trip4	0.117349	0.244086	0.126737	Trip4
Msx1	0.131028	0.25776	0.126732	Msx1
Gm28727	0.0311808	0.157897	0.126716	Gm28727
Ten1	0.0311808	0.157897	0.126716	Ten1
Sumf1	0.147444	0.274112	0.126668	Sumf1
Srd5a1	0.0422606	0.168807	0.126546	Srd5a1
Osbpl8	0.22068	0.347182	0.126501	Osbpl8
Sp2	0.0817532	0.208252	0.126499	Sp2
Snupn	0.0825569	0.209025	0.126469	Snupn
P4htm	0.0179876	0.144421	0.126433	P4htm
Afg1l	0.175283	0.301667	0.126384	Afg1l
Tmed1	0.178302	0.304643	0.126341	Tmed1
Ltc4s	0.0528924	0.179212	0.12632	Ltc4s
Psmc1	0.881742	1.00804	0.126296	Psmc1
Bnip2	1.3073	1.43357	0.12627	Bnip2
Aen	0.205379	0.331632	0.126253	Aen
Ssr4	1.03271	1.15894	0.126235	Ssr4
Scg3	0.02754	0.153775	0.126235	Scg3
Pyurf	0.128513	0.254739	0.126226	Pyurf
Twf2	0.54821	0.674423	0.126212	Twf2
Casc4	0.0249337	0.151089	0.126155	Casc4
Asns	0.0179876	0.143953	0.125965	Asns
Edem3	0.0750439	0.200676	0.125632	Edem3
Cldn5	4.47988	4.60546	0.125588	Cldn5
Lsamp	0	0.125525	0.125525	Lsamp
Acy3	0.106911	0.232406	0.125495	Acy3
Nebl	1.40066	1.52612	0.125457	Nebl
Itgb1bp1	0.302619	0.428059	0.12544	Itgb1bp1
Yars	0.125743	0.251136	0.125393	Yars
Clp1	0.140783	0.266165	0.125382	Clp1
1810037I17Rik	1.96903	2.09439	0.125354	1810037I17Rik
Cox7c	1.98337	2.10865	0.125275	Cox7c
Med15	0.158626	0.283833	0.125207	Med15
Itfg2	0.154969	0.280051	0.125082	Itfg2
Iba57	0	0.12505	0.12505	Iba57
Degs2	1.40522	1.53018	0.124969	Degs2
Ube2d3	1.47229	1.59719	0.124899	Ube2d3
Atp23	0.0186338	0.143521	0.124887	Atp23
Hpcal1	0.686194	0.810995	0.124801	Hpcal1
Rars	0.128307	0.253068	0.124762	Rars
Efcab14	0.486435	0.611115	0.12468	Efcab14
Slc10a3	0.0862497	0.210861	0.124611	Slc10a3
Atrip	0.124507	0.248901	0.124395	Atrip
Slc9a6	0.057341	0.181643	0.124302	Slc9a6
Ecscr	0.858183	0.982369	0.124186	Ecscr
Rbm22	0.385569	0.509686	0.124117	Rbm22
Snca	0	0.124025	0.124025	Snca
Nicn1	0.119169	0.243106	0.123937	Nicn1
Lfng	0.708073	0.831922	0.12385	Lfng
Snrpb	1.51835	1.64219	0.123847	Snrpb
Cd9	1.01175	1.13551	0.123755	Cd9
Stub1	0.911273	1.03501	0.123733	Stub1
Rab3ip	0.0866811	0.210394	0.123713	Rab3ip
Cbr3	0.0275446	0.151156	0.123612	Cbr3
Apbb1	0.212069	0.335655	0.123586	Apbb1
Rpn2	0.930484	1.05399	0.123501	Rpn2
Rnf31	0.0611209	0.184606	0.123485	Rnf31
Plcg1	0.275558	0.398992	0.123434	Plcg1
Nup188	0	0.123427	0.123427	Nup188
Atp5j	2.51125	2.63458	0.12333	Atp5j
Mgat5	0	0.123315	0.123315	Mgat5
Gnpda1	0.104592	0.227842	0.123251	Gnpda1
Repin1	0.0174052	0.140604	0.123199	Repin1
Polr3d	0.0185431	0.141741	0.123198	Polr3d
Nqo2	0.171854	0.295004	0.12315	Nqo2
Tmem14a	0.127459	0.250608	0.123149	Tmem14a
Depdc5	0	0.123141	0.123141	Depdc5
Smim26	0.385037	0.508134	0.123097	Smim26
Slc48a1	0.653249	0.776298	0.12305	Slc48a1
Rnf121	0.354912	0.477924	0.123012	Rnf121
Mfsd10	0.40322	0.526198	0.122978	Mfsd10
Phf6	0.0991557	0.222	0.122844	Phf6
Acyp1	0.234717	0.357539	0.122822	Acyp1
Rab42	0	0.122268	0.122268	Rab42
Arpc1b	1.9266	2.04879	0.122193	Arpc1b
Gm16740	0.0202271	0.142412	0.122185	Gm16740
Nxn	0.307047	0.429226	0.12218	Nxn
Ndufa9	0.57035	0.692493	0.122143	Ndufa9
Gm33195	0	0.122081	0.122081	Gm33195
Ldha	1.63142	1.75333	0.121903	Ldha
Ubap2	0.312443	0.434262	0.121818	Ubap2
Fto	0.28875	0.410469	0.121719	Fto
Copg2	0.128775	0.250469	0.121694	Copg2
Tprkb	0.262575	0.384204	0.121629	Tprkb
Fam84b	0	0.121571	0.121571	Fam84b
Hira	0.154524	0.276029	0.121505	Hira
Fam110a	0.251618	0.373061	0.121443	Fam110a
Ensa	0.69042	0.81186	0.121441	Ensa
Ccdc102a	0.212731	0.334143	0.121411	Ccdc102a
Dusp23	0.259087	0.380427	0.121339	Dusp23
Paip2	1.16595	1.28723	0.121283	Paip2
Coq9	0.155952	0.277153	0.121201	Coq9
Rabep2	0.224458	0.345652	0.121194	Rabep2
Urod	0.284721	0.405794	0.121073	Urod
Fbxo5	0.00766018	0.128719	0.121059	Fbxo5
Tmem62	0	0.120881	0.120881	Tmem62
Prkra	0.173786	0.294625	0.120839	Prkra
Miga2	0	0.120822	0.120822	Miga2
Evi5	0.572581	0.693275	0.120695	Evi5
Gar1	0.221561	0.342248	0.120687	Gar1
Hint3	0.574197	0.694867	0.12067	Hint3
Klf2	2.7735	2.89415	0.120651	Klf2
Fkrp	0.0479123	0.168456	0.120543	Fkrp
E2f5	0.267567	0.388094	0.120527	E2f5
Nradd	0	0.120409	0.120409	Nradd
Zfp593	0.02754	0.147943	0.120403	Zfp593
Malt1	0.107292	0.227628	0.120336	Malt1
Rps9	2.47997	2.60027	0.120305	Rps9
Slc19a3	0.3673	0.487579	0.120279	Slc19a3
Ly96	0.0834259	0.203631	0.120205	Ly96
2010007H06Rik	0.121496	0.241631	0.120135	2010007H06Rik
Tuba1b	1.96312	2.08322	0.120108	Tuba1b
Psmd8	0.860566	0.980614	0.120048	Psmd8
2610037D02Rik	0.245468	0.365335	0.119867	2610037D02Rik
Rplp2	2.4006	2.5204	0.119797	Rplp2
Zfyve21	0.159222	0.278896	0.119674	Zfyve21
Rela	0.489054	0.608727	0.119673	Rela
Mfge8	0.655546	0.775037	0.119491	Mfge8
Bcl7c	0.446228	0.565706	0.119478	Bcl7c
Anxa11	0.48387	0.60328	0.11941	Anxa11
Vsnl1	0.048612	0.168009	0.119397	Vsnl1
Psmd4	1.00993	1.1293	0.119368	Psmd4
Mier2	0	0.119281	0.119281	Mier2
Pcsk1n	0.605607	0.724869	0.119263	Pcsk1n
Shank2	0.0186338	0.137841	0.119208	Shank2
Acad11	0.0510975	0.17009	0.118993	Acad11
Arap3	0.723082	0.842021	0.118939	Arap3
Mapk1ip1l	0.170613	0.28934	0.118727	Mapk1ip1l
Mylip	0.126984	0.245669	0.118685	Mylip
Twsg1	0.0357203	0.154331	0.118611	Twsg1
Prkch	0.891394	1.00991	0.118516	Prkch
Lhfp	0.0133717	0.131708	0.118336	Lhfp
Thoc5	0.183275	0.301586	0.118311	Thoc5
Tmem219	0.21537	0.333671	0.118301	Tmem219
Uqcrh	1.79929	1.91751	0.118219	Uqcrh
Hes5	0.0174052	0.135604	0.118199	Hes5
Xylt2	0.10044	0.21862	0.11818	Xylt2
Gm5617	0.233135	0.351303	0.118169	Gm5617
Rdh11	0	0.118163	0.118163	Rdh11
Wnt5b	0.163238	0.281346	0.118108	Wnt5b
Tbc1d13	0.0244838	0.142581	0.118098	Tbc1d13
6230400D17Rik	0.0244838	0.142546	0.118062	6230400D17Rik
Cpq	0.137664	0.255718	0.118054	Cpq
Zbed3	0.13833	0.256302	0.117973	Zbed3
Faap100	0.0523953	0.170133	0.117737	Faap100
Rab1a	1.09974	1.21744	0.117707	Rab1a
Fbrsl1	0.0823086	0.20001	0.117701	Fbrsl1
Csf1	0	0.117631	0.117631	Csf1
U2af2	0.577983	0.695605	0.117623	U2af2
Myl12a	2.54373	2.66124	0.117504	Myl12a
Tmem11	0.434339	0.551688	0.117349	Tmem11
Eif4b	0.712364	0.829664	0.1173	Eif4b
Cttn	0.494103	0.611241	0.117138	Cttn
Coa6	0.429132	0.546269	0.117136	Coa6
Hmgb2	0.952236	1.06936	0.117128	Hmgb2
Tpm4	1.805	1.92191	0.116912	Tpm4
Mfap1b	0.54588	0.662765	0.116885	Mfap1b
Hint2	0.822082	0.938866	0.116784	Hint2
Rgs10	0.237168	0.35393	0.116762	Rgs10
Rrp9	0.109211	0.225949	0.116739	Rrp9
Zfp467	0.0311226	0.147794	0.116672	Zfp467
Cklf	0.0774068	0.194077	0.11667	Cklf
Hltf	0.247373	0.364022	0.116648	Hltf
Elf1	0.376594	0.493232	0.116638	Elf1
Rilpl1	0.374805	0.491433	0.116629	Rilpl1
Vegfb	0.0185452	0.135125	0.11658	Vegfb
Ranbp1	0.974356	1.09083	0.116474	Ranbp1
Rps3	2.74861	2.86505	0.116441	Rps3
Lrig2	0.0563527	0.172757	0.116404	Lrig2
Psenen	1.02357	1.13993	0.116361	Psenen
Gm6710	0	0.116342	0.116342	Gm6710
Apc	0.407324	0.523606	0.116282	Apc
Txn1	1.56066	1.6769	0.116242	Txn1
Adck2	0.0947157	0.210908	0.116192	Adck2
Mafg	0.257971	0.374142	0.11617	Mafg
Rfc3	0.0578653	0.174013	0.116148	Rfc3
Sgta	0.703088	0.81916	0.116072	Sgta
Faim2	0	0.11606	0.11606	Faim2
Kif3c	0	0.116013	0.116013	Kif3c
Haus7	0.0710303	0.186893	0.115863	Haus7
Erg28	0.35892	0.474745	0.115825	Erg28
Tnfrsf21	0.218457	0.334265	0.115809	Tnfrsf21
Ddit4	0.840319	0.956048	0.115729	Ddit4
Gsr	0.339359	0.455079	0.11572	Gsr
Atp6v1b2	0.366426	0.48211	0.115684	Atp6v1b2
Ppm1k	0.0430837	0.158754	0.115671	Ppm1k
Mocs2	0.662976	0.778628	0.115652	Mocs2
Med17	0.188977	0.30461	0.115633	Med17
Hint1	1.83906	1.9547	0.115632	Hint1
Fam171a2	0.0478457	0.163404	0.115558	Fam171a2
Mrpl18	0.597275	0.71271	0.115435	Mrpl18
Fam118b	0.3062	0.421426	0.115225	Fam118b
Btbd6	0.11559	0.230758	0.115167	Btbd6
Hexim1	0.115921	0.231075	0.115154	Hexim1
Cmpk1	0.818414	0.933559	0.115145	Cmpk1
Vmn1r12	0.0428559	0.157897	0.115041	Vmn1r12
Raly	1.09373	1.20874	0.115015	Raly
Noc3l	0.0186338	0.133457	0.114824	Noc3l
Shank1	0	0.114811	0.114811	Shank1
Pde1b	0	0.114743	0.114743	Pde1b
Reep5	1.18619	1.30087	0.114678	Reep5
Mcm4	0.102616	0.217272	0.114656	Mcm4
Zfyve27	0.193547	0.308149	0.114603	Zfyve27
0610040B10Rik	0.106955	0.221526	0.114571	0610040B10Rik
Map2k2	0.838768	0.953312	0.114545	Map2k2
Ddx54	0.580075	0.694578	0.114503	Ddx54
Fam89a	0	0.114389	0.114389	Fam89a
Gm20696	0.0551493	0.169491	0.114342	Gm20696
Zdhhc7	0.282293	0.396556	0.114263	Zdhhc7
Tmem158	0.0185452	0.132515	0.113969	Tmem158
Llph	0.686299	0.800263	0.113964	Llph
Chchd4	0.192814	0.306757	0.113944	Chchd4
Znhit2	0.135131	0.249042	0.113912	Znhit2
Wipf3	0.0611209	0.174996	0.113875	Wipf3
Eri3	0.344958	0.458831	0.113874	Eri3
Fbxo4	0.143647	0.257458	0.113811	Fbxo4
Nde1	0.593187	0.706993	0.113805	Nde1
Ints11	0.217926	0.33163	0.113704	Ints11
Nsa2	0.539194	0.652887	0.113694	Nsa2
Rgs4	0.0613281	0.174996	0.113668	Rgs4
Slc16a2	0.988553	1.10215	0.113598	Slc16a2
Tmtc4	0.150817	0.264331	0.113514	Tmtc4
Atp2b1	0.751751	0.86521	0.113458	Atp2b1
Slx1b	0.27489	0.388316	0.113426	Slx1b
Bpgm	0.315627	0.429009	0.113382	Bpgm
Zfp821	0.0860078	0.19937	0.113362	Zfp821
Cc2d1a	0.171772	0.285084	0.113312	Cc2d1a
Pnpla2	0.509225	0.622483	0.113258	Pnpla2
Ewsr1	0.878901	0.991937	0.113036	Ewsr1
Pmf1	0.123175	0.236153	0.112978	Pmf1
Gm12355	0	0.112955	0.112955	Gm12355
Mgat4a	0.0358289	0.14873	0.112901	Mgat4a
Sf1	0.374663	0.487532	0.112869	Sf1
Psmd7	0.919869	1.03266	0.112789	Psmd7
Gramd1a	0.187763	0.300518	0.112755	Gramd1a
Zkscan4	0	0.112622	0.112622	Zkscan4
Dhrs7b	0.124919	0.237528	0.112609	Dhrs7b
Borcs7	0.235634	0.348209	0.112575	Borcs7
Ptpn11	0.451275	0.563776	0.112501	Ptpn11
Mrpl1	0.362017	0.474453	0.112436	Mrpl1
Ndufa2	1.71388	1.82628	0.112395	Ndufa2
Itgb3bp	0.0735137	0.185727	0.112213	Itgb3bp
Nfatc3	0.111712	0.223784	0.112072	Nfatc3
Zdhhc9	0.112124	0.224163	0.112039	Zdhhc9
Ptprz1	0.0154251	0.12738	0.111955	Ptprz1
Gna13	0.31362	0.425547	0.111927	Gna13
Haus1	0.0154251	0.127347	0.111921	Haus1
Bag3	0.109949	0.221844	0.111895	Bag3
Oxr1	0.436873	0.548761	0.111888	Oxr1
Glod4	0.525415	0.63727	0.111855	Glod4
Cyp2u1	0	0.111851	0.111851	Cyp2u1
Tmem183a	0.329894	0.441599	0.111705	Tmem183a
Abcf3	0.171158	0.282852	0.111694	Abcf3
Cmtr1	0	0.111627	0.111627	Cmtr1
2810001G20Rik	0.057504	0.169051	0.111547	2810001G20Rik
Mlycd	0.348448	0.459943	0.111495	Mlycd
Entpd6	0.0275446	0.139007	0.111463	Entpd6
Maob	0.186102	0.297543	0.111441	Maob
Mlf2	1.08714	1.19851	0.111372	Mlf2
Coa7	0.173574	0.284942	0.111369	Coa7
Prmt7	0.0804742	0.19179	0.111316	Prmt7
Fam57b	0.156708	0.267992	0.111285	Fam57b
Camta2	0.145872	0.257105	0.111233	Camta2
Agfg2	0	0.111136	0.111136	Agfg2
Sncaip	0.0333328	0.144463	0.111131	Sncaip
Btbd17	0	0.110986	0.110986	Btbd17
Kat7	0.145344	0.256295	0.110952	Kat7
Uqcrb	1.8617	1.97261	0.110907	Uqcrb
Akt2	0.123513	0.234412	0.110899	Akt2
Tspyl1	0.299107	0.410001	0.110894	Tspyl1
Ptprr	1.20359	1.31437	0.110777	Ptprr
Capns1	1.66673	1.77745	0.110724	Capns1
Prpf6	0.324508	0.435113	0.110604	Prpf6
Ankrd33b	0.148084	0.258587	0.110503	Ankrd33b
Itgb4	0.0154251	0.125926	0.110501	Itgb4
Rabac1	1.94201	2.05234	0.110338	Rabac1
Gm15860	0	0.110313	0.110313	Gm15860
Zfp263	0.356946	0.467193	0.110247	Zfp263
Ttr	0.0133326	0.123551	0.110219	Ttr
Mvb12a	0.341614	0.451821	0.110207	Mvb12a
Commd10	0.356562	0.466713	0.110151	Commd10
Tars	0.325724	0.435822	0.110097	Tars
Caap1	0.175856	0.285821	0.109965	Caap1
Ptpn1	0.421707	0.531578	0.109871	Ptpn1
Mgat2	0.50504	0.614749	0.10971	Mgat2
March2	0.684682	0.794347	0.109666	2022-03-02
Nomo1	0.535431	0.645053	0.109622	Nomo1
Pik3c3	0.0958996	0.205493	0.109594	Pik3c3
Zfp825	0.163913	0.273462	0.109549	Zfp825
Errfi1	0	0.109505	0.109505	Errfi1
Trp53inp2	0.0953952	0.204888	0.109493	Trp53inp2
Vcl	0.299419	0.408883	0.109464	Vcl
Parva	0.235174	0.344536	0.109362	Parva
Uhrf1bp1	0	0.109343	0.109343	Uhrf1bp1
Olfml2a	0.0524464	0.161665	0.109218	Olfml2a
AU019823	0.102916	0.212065	0.109149	AU019823
Avl9	0.200705	0.30985	0.109145	Avl9
Lxn	0.59542	0.70454	0.10912	Lxn
Fam43a	0.542922	0.652023	0.109102	Fam43a
Mrpl37	0.0478039	0.156843	0.109039	Mrpl37
Coq4	0.0939487	0.20296	0.109011	Coq4
Tsen2	0.0861481	0.195093	0.108945	Tsen2
Usp47	0.21476	0.323683	0.108923	Usp47
Prag1	0	0.108911	0.108911	Prag1
Ercc4	0.143804	0.25268	0.108877	Ercc4
Cfdp1	0.71176	0.82058	0.10882	Cfdp1
Zfp407	0.118366	0.227156	0.10879	Zfp407
Ldb1	0.19803	0.306818	0.108788	Ldb1
Cdk2ap2	0.553684	0.662353	0.108669	Cdk2ap2
Id3	2.94958	3.05819	0.108607	Id3
Taf1d	0.407025	0.515578	0.108553	Taf1d
Mboat1	0.0625142	0.171044	0.10853	Mboat1
Suclg1	0.615318	0.723842	0.108524	Suclg1
Man1a	0.204765	0.31324	0.108475	Man1a
Casp9	0.0379712	0.146383	0.108412	Casp9
Cln3	0.0152621	0.123663	0.108401	Cln3
Mcub	0.424865	0.533231	0.108366	Mcub
Cyb5b	0.776022	0.884383	0.108361	Cyb5b
Zdhhc16	0.190758	0.299015	0.108256	Zdhhc16
Hepacam	0	0.108018	0.108018	Hepacam
Tomm40l	0.177942	0.285925	0.107983	Tomm40l
Tyms	0.196201	0.304137	0.107936	Tyms
Krba1	0.0185452	0.126471	0.107926	Krba1
Sorbs2	1.27759	1.38551	0.107922	Sorbs2
Rbks	0.0133326	0.121252	0.107919	Rbks
Dtx2	0.0179876	0.125803	0.107815	Dtx2
Ccdc22	0.055351	0.163115	0.107764	Ccdc22
Adgra3	0.0524716	0.160219	0.107748	Adgra3
Qrich1	0.277703	0.385343	0.10764	Qrich1
D3Ertd254e	0.0455905	0.153186	0.107596	D3Ertd254e
Gorab	0.0306159	0.138165	0.107549	Gorab
Abhd5	0.386991	0.494529	0.107538	Abhd5
Rab35	0.340117	0.447457	0.10734	Rab35
Cry1	0.0326269	0.139948	0.107321	Cry1
Rrnad1	0.270361	0.37768	0.107319	Rrnad1
Plpp2	0	0.107254	0.107254	Plpp2
Btf3l4	0.0942154	0.201448	0.107233	Btf3l4
Zbtb45	0.323173	0.430397	0.107225	Zbtb45
Ddx60	0.0845581	0.191558	0.107	Ddx60
Zfp131	0.102241	0.209209	0.106968	Zfp131
Uck1	0.0854708	0.192305	0.106834	Uck1
Cwc15	1.00485	1.11167	0.106824	Cwc15
Stmn3	0.155533	0.262344	0.106811	Stmn3
Traf5	0.177125	0.283914	0.106789	Traf5
Eif4e2	0.379021	0.485713	0.106692	Eif4e2
Peak1	0.237285	0.343893	0.106608	Peak1
Atp5f1	1.22826	1.33486	0.106606	Atp5f1
Lin37	0.144636	0.251164	0.106529	Lin37
C1qa	0.0948473	0.201359	0.106511	C1qa
Rer1	0.745825	0.852308	0.106483	Rer1
Twistnb	0.37949	0.485922	0.106432	Twistnb
Kdm2b	0.0937375	0.200091	0.106353	Kdm2b
Anks1b	0	0.106308	0.106308	Anks1b
Dynlt1a	0.0356575	0.141926	0.106268	Dynlt1a
Crbn	0.358173	0.46443	0.106257	Crbn
Tlr2	0	0.106238	0.106238	Tlr2
Txnip	0.853235	0.959237	0.106002	Txnip
Fam20a	0.0209305	0.126757	0.105826	Fam20a
Srebf1	0.127701	0.233407	0.105706	Srebf1
Ccdc157	0.051709	0.157374	0.105665	Ccdc157
Ddx19a	0.1537	0.259276	0.105575	Ddx19a
Arf4	0.850094	0.955654	0.10556	Arf4
Dtymk	0.2089	0.314434	0.105534	Dtymk
Gapdh	1.19473	1.30026	0.10553	Gapdh
Plekhj1	0.279986	0.385502	0.105516	Plekhj1
Gm26670	0.0449985	0.150505	0.105506	Gm26670
Slc25a42	0	0.105476	0.105476	Slc25a42
Cspg5	0.160865	0.266327	0.105462	Cspg5
Map7d1	0.998061	1.10347	0.105408	Map7d1
[truncated: 11,039 more rows]

## Sheet: Ependymal
gene_id	Control	Treated	diff	gene
Acta2	1.27566	2.70047	1.42481	Acta2
Id4	1.26045	2.53994	1.27949	Id4
Atp1a2	1.74902	2.95393	1.20491	Atp1a2
Pid1	0.280548	1.41807	1.13752	Pid1
Id2	0.766259	1.87341	1.10716	Id2
Kcnk1	0.0813859	1.15793	1.07655	Kcnk1
Tagln	0.178798	1.21629	1.03749	Tagln
Srl	0.426477	1.44597	1.01949	Srl
Csmd1	0.162374	1.17284	1.01046	Csmd1
Pdlim2	0.0717074	1.07374	1.00204	Pdlim2
Siah2	0.149618	1.13655	0.986936	Siah2
Homez	0.0681851	1.04125	0.973062	Homez
AI480526	0.178763	1.14136	0.9626	AI480526
Scai	0.285588	1.23989	0.954299	Scai
Gm26699	0.258659	1.21039	0.951735	Gm26699
Lbp	1.5326	2.4829	0.950306	Lbp
Dtx4	0.0108104	0.959768	0.948958	Dtx4
Haghl	0.615687	1.55082	0.935137	Haghl
Pfn2	0.834154	1.76308	0.928928	Pfn2
9930021J03Rik	0.0904134	1.01519	0.924776	9930021J03Rik
Flii	0.367849	1.28781	0.919961	Flii
Fbxo31	0.0108104	0.924652	0.913842	Fbxo31
Bin3	0.12679	1.03742	0.910633	Bin3
Amotl2	0.397457	1.30622	0.908766	Amotl2
Meis2	0.279871	1.18761	0.907739	Meis2
Dkk3	0.556076	1.46225	0.906173	Dkk3
Rabep2	0.0292823	0.933329	0.904047	Rabep2
Ankrd17	0.376915	1.27755	0.900632	Ankrd17
Nedd9	0.130841	1.03065	0.899806	Nedd9
Nt5c3b	0.502677	1.39725	0.894577	Nt5c3b
Col6a5	0.447078	1.33927	0.892189	Col6a5
Rnf169	0.0857913	0.975434	0.889643	Rnf169
Rnpep	0.369764	1.25341	0.883642	Rnpep
Gm15261	0	0.883478	0.883478	Gm15261
Stx12	0.06278	0.9455	0.88272	Stx12
C1galt1	0.133853	1.0147	0.880848	C1galt1
St5	0.299623	1.17415	0.874524	St5
Shisa4	0.628628	1.50291	0.87428	Shisa4
Eef2	0.917848	1.78529	0.867445	Eef2
Atp6v0e2	0.723713	1.59066	0.866952	Atp6v0e2
Mcl1	0.0856251	0.95124	0.865615	Mcl1
Cxcr4	0.371604	1.23622	0.864614	Cxcr4
Ipo4	0.261705	1.11831	0.856607	Ipo4
Coq9	0.26778	1.1191	0.851323	Coq9
Glt8d1	0.52592	1.37506	0.84914	Glt8d1
Serinc1	0.429266	1.27335	0.844084	Serinc1
Mgat1	0.117251	0.959768	0.842517	Mgat1
Slc38a2	0.537117	1.37501	0.837891	Slc38a2
Tprgl	0.452435	1.28613	0.833697	Tprgl
Snx6	0.578184	1.41166	0.833476	Snx6
Rgl2	0.345592	1.1779	0.832307	Rgl2
Nudcd3	0.36167	1.19084	0.829169	Nudcd3
Ncoa2	0.194281	1.02232	0.82804	Ncoa2
Galnt11	0.124344	0.95124	0.826896	Galnt11
Naga	0.895037	1.72178	0.826743	Naga
Rdh10	0.294815	1.11051	0.815693	Rdh10
Rprm	0.305797	1.12122	0.815423	Rprm
Tspan7	0.0598803	0.874356	0.814476	Tspan7
Rapgef3	0.146642	0.95124	0.804598	Rapgef3
Xab2	0.155004	0.953586	0.798581	Xab2
S1pr1	0.0856251	0.883478	0.797853	S1pr1
Rhbdd3	0.0862949	0.883478	0.797183	Rhbdd3
Pdcd11	0.133686	0.930513	0.796827	Pdcd11
Atp1b1	0.803704	1.59898	0.795272	Atp1b1
Wars	0.18273	0.977216	0.794486	Wars
Ntsr2	0.182855	0.977216	0.794361	Ntsr2
Ssr1	0.57543	1.36971	0.794281	Ssr1
Pter	0.0899628	0.883478	0.793515	Pter
Plpp3	0.95649	1.74942	0.792928	Plpp3
Nfkbia	0.364783	1.15286	0.788081	Nfkbia
Tmem50b	0.135754	0.922238	0.786484	Tmem50b
Plxdc2	0.294256	1.07949	0.785234	Plxdc2
Srsf6	0.313887	1.09782	0.783937	Srsf6
Dnal4	0.919084	1.7019	0.782814	Dnal4
Mfsd10	0.436155	1.21818	0.78202	Mfsd10
Slc35b1	0.335027	1.11539	0.780358	Slc35b1
Pmpcb	0.207134	0.987107	0.779972	Pmpcb
Nifk	0.156654	0.933329	0.776675	Nifk
Taf6	0.201319	0.977216	0.775898	Taf6
Pla2g7	1.28171	2.05641	0.774701	Pla2g7
Adgra1	0.34944	1.12065	0.771207	Adgra1
Retreg2	0.288659	1.05818	0.769522	Retreg2
Efemp2	0.464038	1.23121	0.767175	Efemp2
Zfp263	0.321494	1.08781	0.766317	Zfp263
Mapk8ip1	0.392159	1.15818	0.766023	Mapk8ip1
Hnrnpdl	0.76046	1.52225	0.761795	Hnrnpdl
Atp1b2	0.815422	1.5769	0.761477	Atp1b2
Mboat2	0.248413	1.00938	0.760968	Mboat2
Impdh1	0.0688557	0.827198	0.758342	Impdh1
Anxa8	0.453553	1.20899	0.755436	Anxa8
Ptdss2	0.28341	1.03742	0.754013	Ptdss2
Zfp219	0.333041	1.08699	0.753954	Zfp219
Xpo7	0.201309	0.953586	0.752276	Xpo7
Psmd3	0.39187	1.14339	0.751521	Psmd3
Akr1a1	0.43999	1.19	0.750011	Akr1a1
Prrc2a	0.311715	1.05964	0.747927	Prrc2a
Mn1	0.167701	0.91125	0.74355	Mn1
Mpp1	0.4577	1.19491	0.737215	Mpp1
Nit1	0.241223	0.978127	0.736904	Nit1
Gaa	0.602487	1.33937	0.736881	Gaa
Mmd2	0.436076	1.17138	0.735303	Mmd2
Fam168b	0.244985	0.979502	0.734516	Fam168b
Vbp1	0.203697	0.936429	0.732732	Vbp1
Pde4d	0.122876	0.854912	0.732036	Pde4d
Tmem55b	0.0240064	0.754853	0.730846	Tmem55b
Phrf1	0.220917	0.95124	0.730323	Phrf1
Pnpla2	0.0671826	0.796953	0.729771	Pnpla2
Cers6	0.154385	0.883478	0.729093	Cers6
Pigz	0.233873	0.955699	0.721825	Pigz
Slc1a3	0.860719	1.58185	0.72113	Slc1a3
Tecpr2	0.183399	0.903278	0.719879	Tecpr2
Ptprs	0.0698647	0.788825	0.718961	Ptprs
Tmem150a	0	0.718823	0.718823	Tmem150a
Aox1	0.113155	0.831567	0.718412	Aox1
Pantr1	0.109528	0.827198	0.71767	Pantr1
Epha5	0.16663	0.883478	0.716848	Epha5
Slc39a9	0.210674	0.92698	0.716306	Slc39a9
Ppp1r3c	0.192014	0.906905	0.714891	Ppp1r3c
Mllt6	0.169939	0.883478	0.713539	Mllt6
Fnbp1	0.268467	0.981561	0.713094	Fnbp1
Cby1	0.853791	1.56536	0.711574	Cby1
Zfand5	0.517005	1.2265	0.709499	Zfand5
Tbc1d9b	0.342025	1.051	0.708974	Tbc1d9b
Slc2a1	1.88485	2.5938	0.708942	Slc2a1
Tarbp2	0.0108104	0.718823	0.708012	Tarbp2
Ahnak	0.685197	1.39155	0.706355	Ahnak
Klhl3	0.119829	0.824536	0.704708	Klhl3
Hey1	0.433647	1.13643	0.702783	Hey1
Pars2	0.0446047	0.747259	0.702654	Pars2
Tmem68	0.0108104	0.711475	0.700665	Tmem68
Ptprf	0.665827	1.36308	0.697253	Ptprf
Crocc	0.788001	1.483	0.694995	Crocc
Cpne2	0.917443	1.61131	0.693866	Cpne2
Rnf114	0.16162	0.854913	0.693293	Rnf114
Dnajc9	0.527891	1.21613	0.688235	Dnajc9
Ndufs2	0.476432	1.16455	0.688116	Ndufs2
2010107E04Rik	1.38635	2.07362	0.68727	2010107E04Rik
Ak1	0.619154	1.30584	0.686688	Ak1
Epn1	0.199252	0.885228	0.685976	Epn1
Acsl6	0.270349	0.956318	0.685969	Acsl6
Mindy4	0.108498	0.793725	0.685228	Mindy4
Sncg	1.09478	1.77992	0.685144	Sncg
Cebpzos	0.609845	1.2947	0.684855	Cebpzos
Mgea5	0.520713	1.20449	0.683776	Mgea5
Flna	0.4462	1.12975	0.68355	Flna
Dnah11	0.639055	1.31979	0.680733	Dnah11
Cmc4	0.277521	0.957026	0.679504	Cmc4
Man2c1	0.0354788	0.714455	0.678976	Man2c1
A830082K12Rik	0.0688557	0.747259	0.678403	A830082K12Rik
Angptl2	0.186287	0.863858	0.677571	Angptl2
Phf20l1	0.177474	0.854912	0.677438	Phf20l1
Plec	0.604317	1.28042	0.676102	Plec
Slc25a11	0.53631	1.21206	0.675748	Slc25a11
Clptm1	0.46449	1.1396	0.675107	Clptm1
Vapa	1.06261	1.73714	0.674536	Vapa
Arid1a	0.366544	1.03575	0.669201	Arid1a
Gar1	0.448682	1.11677	0.668083	Gar1
Ifrd1	0.187943	0.854912	0.66697	Ifrd1
Aco2	0.561804	1.2268	0.664999	Aco2
Ncoa1	0.157478	0.82246	0.664982	Ncoa1
Tgif2	0.134189	0.798243	0.664054	Tgif2
Mplkip	0.384354	1.0484	0.664044	Mplkip
Zbtb44	0.121196	0.784138	0.662941	Zbtb44
Napa	0.38074	1.04217	0.661433	Napa
Igfbp4	0	0.660369	0.660369	Igfbp4
Lpcat1	0	0.660369	0.660369	Lpcat1
Dhx40	0.499773	1.15627	0.656499	Dhx40
Pts	0.528388	1.1844	0.656016	Pts
Sbno1	0.588933	1.24453	0.655601	Sbno1
Wdr6	0.29991	0.953586	0.653675	Wdr6
Bcl2	0.473539	1.12553	0.651994	Bcl2
Stim2	0.0519112	0.703543	0.651632	Stim2
Cct4	0.919476	1.57026	0.650783	Cct4
Kdelr2	0.283382	0.93341	0.650028	Kdelr2
Gramd1b	0.0354788	0.685057	0.649578	Gramd1b
Hyal1	0.0358138	0.685057	0.649243	Hyal1
Fkbp15	0.0358138	0.685057	0.649243	Fkbp15
Cadm1	1.16694	1.81548	0.648538	Cadm1
Psmd2	0.654873	1.30301	0.64814	Psmd2
Lrch3	0.30342	0.95124	0.64782	Lrch3
Naaa	1.14858	1.79544	0.646864	Naaa
Akt2	0.325871	0.972057	0.646185	Akt2
Nup50	0.305092	0.95124	0.646149	Nup50
Sirt3	0.895374	1.54101	0.645632	Sirt3
Tollip	0.118209	0.76377	0.645561	Tollip
Lrrc18	0.175432	0.819785	0.644353	Lrrc18
Plat	1.36042	2.00476	0.64434	Plat
Lmbrd1	0.695762	1.33729	0.641528	Lmbrd1
Slc16a1	0.561829	1.20234	0.640513	Slc16a1
Cyb561	0.901232	1.5397	0.638471	Cyb561
Orai2	0.0108104	0.648847	0.638037	Orai2
Cyp2d22	0.0108104	0.648847	0.638037	Cyp2d22
Tnks	0.265471	0.903278	0.637807	Tnks
Arl8b	0.175092	0.81267	0.637578	Arl8b
Rac1	0.829326	1.4669	0.637575	Rac1
Atxn1	1.07532	1.71095	0.63563	Atxn1
Sfxn1	0.609341	1.24493	0.635588	Sfxn1
Tef	0.324809	0.959768	0.634959	Tef
Zfp703	0.224021	0.858796	0.634775	Zfp703
Nucb1	0.157192	0.791458	0.634266	Nucb1
Uvssa	0.571446	1.20455	0.633105	Uvssa
Nat8f4	0.106893	0.739606	0.632713	Nat8f4
Maz	0.161782	0.793725	0.631943	Maz
Srsf2	0.524662	1.15645	0.631784	Srsf2
Ube4b	0.0292823	0.660369	0.631087	Ube4b
Med9	0.32078	0.951319	0.630539	Med9
Gas1	0.283199	0.91125	0.628051	Gas1
Nfkb1	0.135774	0.76377	0.627996	Nfkb1
Pcmtd2	0.255514	0.883478	0.627964	Pcmtd2
Klf13	0.163682	0.790973	0.627291	Klf13
Rnf208	0.0252717	0.652019	0.626748	Rnf208
Usp46	0.108747	0.733786	0.625039	Usp46
BC051019	0.609667	1.23427	0.624606	BC051019
Tbc1d22a	0	0.624534	0.624534	Tbc1d22a
Por	0.504598	1.12785	0.623254	Por
Timm50	0.285709	0.907732	0.622023	Timm50
Jun	0.796279	1.41759	0.621308	Jun
Tomm20	0.546837	1.16809	0.62125	Tomm20
Esyt1	0	0.620697	0.620697	Esyt1
Fastkd1	0.0397824	0.660369	0.620587	Fastkd1
Cnot1	0.717371	1.33653	0.619161	Cnot1
Ube2d2a	0.850091	1.46849	0.618394	Ube2d2a
Rfesd	0.096216	0.714455	0.618239	Rfesd
Aprt	0.580026	1.19782	0.617792	Aprt
Nrxn3	0.128749	0.744981	0.616232	Nrxn3
Zic5	0	0.615878	0.615878	Zic5
Zfp579	0	0.612589	0.612589	Zfp579
Klhl22	0.122004	0.733786	0.611782	Klhl22
Kif1bp	0.627228	1.23883	0.611599	Kif1bp
Slc6a15	0.0488321	0.660369	0.611537	Slc6a15
Pqlc1	0.262996	0.874356	0.61136	Pqlc1
Grpel2	0.107828	0.718823	0.610995	Grpel2
Trappc9	0.0108104	0.620697	0.609887	Trappc9
Slc4a3	0.0397824	0.648847	0.609065	Slc4a3
Sdc4	1.19787	1.80649	0.608615	Sdc4
Uri1	0.153899	0.762435	0.608535	Uri1
Heg1	0.134906	0.742125	0.60722	Heg1
Fbxo11	0.216523	0.82246	0.605937	Fbxo11
Rtcb	0.315884	0.921812	0.605928	Rtcb
Gdi2	0.837597	1.44348	0.605878	Gdi2
Acad11	0.0952508	0.70053	0.605279	Acad11
Trim28	0.163189	0.767096	0.603907	Trim28
Dbndd1	0.190561	0.793725	0.603164	Dbndd1
Thra	1.05168	1.65465	0.602968	Thra
Rab1b	0.273966	0.876889	0.602923	Rab1b
Ckap4	0.105237	0.707959	0.602721	Ckap4
Chmp6	0.15725	0.759594	0.602344	Chmp6
Tnpo3	0.298634	0.900894	0.60226	Tnpo3
Aida	0.0108104	0.612589	0.601779	Aida
Arf3	0.363906	0.964803	0.600897	Arf3
Rnf152	0.0215053	0.620697	0.599192	Rnf152
Ppm1a	0.273372	0.871817	0.598445	Ppm1a
Gabbr1	0.478484	1.07688	0.598397	Gabbr1
Dynlt1a	0.0867128	0.685057	0.598344	Dynlt1a
Myl4	0.397074	0.995345	0.598271	Myl4
Crls1	0.286912	0.883478	0.596567	Crls1
Asf1a	0.407357	1.00342	0.596065	Asf1a
Erp44	0.190996	0.78691	0.595914	Erp44
mt-Co1	4.43659	5.03244	0.595845	mt-Co1
Man1a2	0.468139	1.06375	0.595612	Man1a2
Tmx1	0.450872	1.04525	0.594378	Tmx1
Opa3	0.120155	0.714455	0.5943	Opa3
Pola2	0.0308956	0.624534	0.593638	Pola2
Rnf170	0.058658	0.652019	0.593361	Rnf170
Capg	0.308304	0.901422	0.593117	Capg
Ikbkb	0.114903	0.707959	0.593056	Ikbkb
Lamtor4	0.522147	1.11397	0.591821	Lamtor4
Cdkl4	0.689871	1.28066	0.590786	Cdkl4
Tyrobp	0.0698647	0.660369	0.590505	Tyrobp
Mfn1	0.387869	0.978127	0.590257	Mfn1
Eif3m	0.626827	1.21559	0.58876	Eif3m
Nfic	0.61744	1.20503	0.587593	Nfic
Coq3	0.097725	0.685057	0.587332	Coq3
Samd8	0.149554	0.7367	0.587146	Samd8
Grn	0.0741723	0.660369	0.586197	Grn
S1pr3	0.0345617	0.620697	0.586136	S1pr3
Txndc11	0.06278	0.648847	0.586067	Txndc11
Pex11a	0.0308956	0.615878	0.584983	Pex11a
Ralb	0.126731	0.711475	0.584745	Ralb
Adamts6	0.0684631	0.652019	0.583556	Adamts6
Nat10	0	0.583385	0.583385	Nat10
Wdfy3	0.0788827	0.660369	0.581487	Wdfy3
Txndc5	0.585303	1.16578	0.580472	Txndc5
Mpv17l	0.29193	0.872381	0.580451	Mpv17l
Akt1s1	0.135078	0.714455	0.579377	Akt1s1
Atg13	0.175866	0.754853	0.578987	Atg13
Pitpnb	0.349565	0.92698	0.577415	Pitpnb
Btg2	0.104149	0.681446	0.577297	Btg2
Bysl	0.0354788	0.612589	0.57711	Bysl
Fam118b	0.0477847	0.624534	0.576749	Fam118b
Ubc	2.27643	2.85276	0.576328	Ubc
Fam241b	0.373162	0.949411	0.576249	Fam241b
Sirpa	0.272049	0.848132	0.576083	Sirpa
Soat1	0.354567	0.930513	0.575945	Soat1
Acot7	0.221129	0.796953	0.575825	Acot7
Setd5	0.42548	1.0008	0.575317	Setd5
Zfp516	0.0459144	0.620697	0.574783	Zfp516
Tex261	0.532768	1.10749	0.574722	Tex261
Psph	1.43921	2.0134	0.574197	Psph
mt-Nd4	3.83723	4.41073	0.573507	mt-Nd4
Aktip	0.59171	1.16487	0.573164	Aktip
Knop1	0.457842	1.03065	0.572806	Knop1
Lasp1	0.517207	1.0894	0.572197	Lasp1
Psen1	0.136212	0.707959	0.571746	Psen1
Dhx30	0.47279	1.0421	0.569311	Dhx30
Zfand1	0.276366	0.845525	0.56916	Zfand1
Tspan33	0.301734	0.870619	0.568885	Tspan33
Rnft1	0.488676	1.05719	0.56851	Rnft1
Pgk1	1.64144	2.20994	0.5685	Pgk1
Chchd5	0.401425	0.969754	0.568329	Chchd5
Ctc1	0.0920821	0.660369	0.568287	Ctc1
Ngef	0.782804	1.34942	0.566619	Ngef
Abat	0.86447	1.43105	0.566576	Abat
Epb41l5	0.317751	0.883478	0.565727	Epb41l5
Gtf2a2	0.437494	1.00275	0.565253	Gtf2a2
0610030E20Rik	0.318351	0.883478	0.565128	0610030E20Rik
Cep350	0.120786	0.685057	0.564271	Cep350
Rev3l	0.36282	0.92698	0.56416	Rev3l
Ndufa10	0.758971	1.32298	0.564005	Ndufa10
Zfp207	0.531577	1.09484	0.563259	Zfp207
Ppp1r12a	0.534808	1.09782	0.563015	Ppp1r12a
Arhgap31	0.171088	0.733786	0.562698	Arhgap31
Mif4gd	0.747711	1.30993	0.562219	Mif4gd
mt-Nd5	2.15489	2.71644	0.561547	mt-Nd5
Pced1a	0.0890061	0.648847	0.559841	Pced1a
Abcf1	0.415764	0.975434	0.55967	Abcf1
Vamp7	0.238828	0.798243	0.559415	Vamp7
Ubxn7	0.0929219	0.652019	0.559098	Ubxn7
Gtf2ird1	0.122595	0.681446	0.558851	Gtf2ird1
Ttc30b	0.918848	1.47708	0.558234	Ttc30b
Stag1	0.353028	0.91125	0.558222	Stag1
mt-Nd2	2.58062	3.13862	0.557993	mt-Nd2
Gm16499	0.258609	0.815364	0.556755	Gm16499
Slc39a11	0.155184	0.711475	0.556291	Slc39a11
Sms	0.125167	0.681446	0.556279	Sms
Fcgr2b	0	0.556018	0.556018	Fcgr2b
Kcnq2	0	0.556018	0.556018	Kcnq2
Kdm6a	0	0.556018	0.556018	Kdm6a
Kcna2	0	0.556018	0.556018	Kcna2
Pafah2	0	0.556018	0.556018	Pafah2
Arntl2	0	0.556018	0.556018	Arntl2
Kif7	0	0.556018	0.556018	Kif7
Icam5	0	0.556018	0.556018	Icam5
Elavl3	0	0.556018	0.556018	Elavl3
Slc6a20a	0	0.556018	0.556018	Slc6a20a
Grb10	0	0.556018	0.556018	Grb10
Pla2g6	0	0.556018	0.556018	Pla2g6
Dbx2	0	0.556018	0.556018	Dbx2
Hspa1a	0	0.556018	0.556018	Hspa1a
Tagln2	1.06137	1.61717	0.555799	Tagln2
Snrnp70	0.920887	1.47582	0.554936	Snrnp70
Auts2	0.236082	0.790973	0.55489	Auts2
Cct3	1.00732	1.56211	0.554793	Cct3
Wdyhv1	0.650714	1.20417	0.553461	Wdyhv1
Ap3s1	0.169132	0.722302	0.553169	Ap3s1
Slc22a17	0.631355	1.18447	0.553112	Slc22a17
Zfp24	0.289893	0.842912	0.553019	Zfp24
Fam46a	0.12872	0.681446	0.552727	Fam46a
Plekhf2	0.0308956	0.583385	0.552489	Plekhf2
Myh10	0.221889	0.774047	0.552158	Myh10
Lyrm2	0.582206	1.13308	0.550873	Lyrm2
Mark1	0.0341554	0.583385	0.549229	Mark1
2510002D24Rik	0.0341554	0.583385	0.549229	2510002D24Rik
Trmt1l	0.402336	0.95124	0.548904	Trmt1l
Srsf3	0.832561	1.3813	0.548743	Srsf3
Ctbp1	0.417682	0.966028	0.548346	Ctbp1
Xylb	0.185556	0.733786	0.54823	Xylb
Ino80d	0.246083	0.79421	0.548126	Ino80d
Lmod1	0.0526326	0.600612	0.547979	Lmod1
Hes1	0.59128	1.13923	0.54795	Hes1
Ctr9	0.0730465	0.620697	0.547651	Ctr9
Mtif2	0.166992	0.714455	0.547463	Mtif2
Ogfod3	0.294138	0.841175	0.547036	Ogfod3
Mbp	1.52662	2.07355	0.546931	Mbp
Dhx16	0.105384	0.652019	0.546636	Dhx16
Necab3	0.0741723	0.620697	0.546525	Necab3
Rassf2	0.0747169	0.620697	0.545981	Rassf2
Pnpla6	0.228783	0.774047	0.545265	Pnpla6
Schip1	0.0108104	0.556018	0.545208	Schip1
Dusp16	0.189486	0.734433	0.544948	Dusp16
Tmem259	0.0757657	0.620697	0.544932	Tmem259
Rab11fip4	0.241517	0.786059	0.544542	Rab11fip4
Phf10	0.156235	0.70053	0.544296	Phf10
Nampt	0.080372	0.624534	0.544162	Nampt
Ptprk	0.359294	0.903278	0.543983	Ptprk
Polr2j	0.565119	1.10877	0.543647	Polr2j
Tmem132b	0.283089	0.826381	0.543293	Tmem132b
Gm14964	1.80115	2.34413	0.542971	Gm14964
Kmt2c	0.13897	0.681446	0.542476	Kmt2c
Snap91	0.107012	0.648847	0.541835	Snap91
Arx	0.268343	0.809969	0.541627	Arx
Arf2	0.166373	0.707959	0.541586	Arf2
Sdc2	0.754719	1.29622	0.541504	Sdc2
Trim2	0.538302	1.07949	0.541188	Trim2
Dctn6	0.290992	0.831568	0.540575	Dctn6
Ak3	0.63983	1.1801	0.540268	Ak3
Frg1	0.286237	0.826392	0.540155	Frg1
Cdc42se2	0.286481	0.826381	0.5399	Cdc42se2
Sntn	1.56387	2.10351	0.539632	Sntn
Npdc1	0.76452	1.30387	0.539353	Npdc1
Csrp1	0.494754	1.03394	0.539187	Csrp1
Gpr180	0.364385	0.903278	0.538893	Gpr180
Mfhas1	0.0818577	0.620697	0.53884	Mfhas1
Timm29	0.0857455	0.624534	0.538789	Timm29
Ankub1	0.49103	1.02961	0.538578	Ankub1
Mfsd11	0.0753118	0.612589	0.537277	Mfsd11
Zbtb20	2.33229	2.86952	0.537226	Zbtb20
Ogfrl1	0.111885	0.648847	0.536962	Ogfrl1
Dap3	0.67174	1.20867	0.536931	Dap3
Glud1	0.648265	1.18503	0.536767	Glud1
Rbfox2	0.137645	0.673817	0.536172	Rbfox2
Ip6k2	0.468429	1.00342	0.534993	Ip6k2
Gprc5b	0.830109	1.36486	0.534752	Gprc5b
Gja1	1.50611	2.04079	0.534677	Gja1
Map3k6	0.0488321	0.583385	0.534553	Map3k6
Wasf3	0.0863227	0.620697	0.534375	Wasf3
Tram2	0.0240064	0.556018	0.532012	Tram2
Hsd17b7	0.0240064	0.556018	0.532012	Hsd17b7
Icmt	0.0240064	0.556018	0.532012	Icmt
Mtmr7	0.0240064	0.556018	0.532012	Mtmr7
Mrpl9	0.320229	0.851954	0.531725	Mrpl9
Pygb	1.05483	1.58636	0.53153	Pygb
Fkbp4	0.78276	1.31421	0.531448	Fkbp4
Igfbp2	0.628101	1.15942	0.531317	Igfbp2
Evc2	0.0526326	0.583385	0.530752	Evc2
Pgam5	0.0526327	0.583385	0.530752	Pgam5
Phospho2	0.118356	0.648847	0.530491	Phospho2
Rexo4	0.233454	0.76377	0.530315	Rexo4
Zscan26	0.37506	0.905276	0.530215	Zscan26
Xrcc4	0.27798	0.808174	0.530195	Xrcc4
Ppp3r1	0.364386	0.894335	0.529949	Ppp3r1
9530077C05Rik	0.400695	0.930513	0.529818	9530077C05Rik
Il6st	0.449066	0.977216	0.52815	Il6st
Taf4	0.326918	0.854913	0.527995	Taf4
Bmi1	0.121274	0.648847	0.527573	Bmi1
Washc4	0.118914	0.646372	0.527458	Washc4
Rbm48	0.0934511	0.620697	0.527246	Rbm48
Fbxo18	0.158289	0.685057	0.526768	Fbxo18
Slc14a1	0.0292823	0.556018	0.526736	Slc14a1
Gns	0.66686	1.19355	0.526694	Gns
Smim14	0.985716	1.51216	0.526443	Smim14
Rwdd3	0.393579	0.919391	0.525811	Rwdd3
Comt	1.58213	2.10783	0.525702	Comt
Nipsnap2	0.570706	1.09638	0.525675	Nipsnap2
Stx1a	0.0308956	0.556018	0.525123	Stx1a
A2ml1	0.0308956	0.556018	0.525123	A2ml1
C4b	0.0308956	0.556018	0.525123	C4b
Golga4	0.419167	0.942718	0.523552	Golga4
Atic	0.198767	0.722302	0.523534	Atic
Sspn	0.125806	0.648847	0.523041	Sspn
Rars	0.332513	0.854912	0.522399	Rars
Lrrc75b	0.0341554	0.556018	0.521863	Lrrc75b
Clk2	0.197597	0.718823	0.521226	Clk2
Zfp40	0.0354788	0.556018	0.520539	Zfp40
Exoc2	0.161386	0.681446	0.52006	Exoc2
Slc41a1	0.393408	0.913382	0.519975	Slc41a1
Mrpl35	0.242654	0.762435	0.519781	Mrpl35
Ctso	0.777639	1.29708	0.519444	Ctso
Cfap57	0.526061	1.04532	0.519261	Cfap57
Tfeb	0.199659	0.718823	0.519164	Tfeb
Ttc5	0.518522	1.03742	0.518901	Ttc5
Ubxn2b	0.158759	0.676912	0.518152	Ubxn2b
Ptprg	0.196555	0.714455	0.5179	Ptprg
Cnn1	0	0.517884	0.517884	Cnn1
Nacc2	0.501538	1.01842	0.516886	Nacc2
Nr1d1	0.451703	0.968311	0.516608	Nr1d1
Rsbn1	0.328521	0.845065	0.516544	Rsbn1
Dusp11	0.206035	0.722302	0.516267	Dusp11
Tubgcp4	0.0397824	0.556018	0.516236	Tubgcp4
Wscd2	0	0.516162	0.516162	Wscd2
E330009J07Rik	0	0.516162	0.516162	E330009J07Rik
Abhd17c	0	0.516162	0.516162	Abhd17c
Mettl25	0	0.516162	0.516162	Mettl25
Tep1	0	0.516162	0.516162	Tep1
Akap1	0	0.516162	0.516162	Akap1
Abcd4	0	0.516162	0.516162	Abcd4
Zfp707	0	0.516162	0.516162	Zfp707
2900011O08Rik	0	0.516162	0.516162	2900011O08Rik
Zfp52	0	0.516162	0.516162	Zfp52
Gfra4	0	0.516162	0.516162	Gfra4
Gng10	0	0.516162	0.516162	Gng10
Xkr8	0	0.516162	0.516162	Xkr8
Cep85	0	0.516162	0.516162	Cep85
Padi2	0	0.516162	0.516162	Padi2
Tacc3	0	0.516162	0.516162	Tacc3
Cd151	0.501207	1.0169	0.515695	Cd151
Ldb1	0.131007	0.646372	0.515365	Ldb1
Rabggta	0.204718	0.718823	0.514105	Rabggta
Pum2	0.375174	0.888911	0.513737	Pum2
Rpusd3	0	0.51265	0.51265	Rpusd3
Rpa1	0.465166	0.97781	0.512644	Rpa1
Ahi1	0.606464	1.11875	0.512289	Ahi1
Gas6	2.25982	2.77174	0.511925	Gas6
Mrpl39	0.600884	1.11252	0.511633	Mrpl39
Nr2f6	0.394412	0.905276	0.510863	Nr2f6
Ddx52	0.189975	0.70053	0.510555	Ddx52
Col5a3	0.420345	0.930513	0.510168	Col5a3
Ifnar1	0.104045	0.612589	0.508544	Ifnar1
Cfap20	1.35862	1.86685	0.508227	Cfap20
Ap1s1	0.292775	0.800976	0.508201	Ap1s1
Rab1a	0.409766	0.917502	0.507737	Rab1a
Mrpl16	0.203353	0.710949	0.507596	Mrpl16
Als2cl	0.0488321	0.556018	0.507186	Als2cl
Lias	0.240117	0.747259	0.507142	Lias
Bub3	0.694676	1.20179	0.507113	Bub3
Alkbh1	0.0766965	0.583385	0.506688	Alkbh1
Trip12	0.202012	0.707958	0.505947	Trip12
Cyb5d2	0.261303	0.767096	0.505793	Cyb5d2
Brf2	0.0108104	0.516162	0.505352	Brf2
Ldhd	0.0108104	0.516162	0.505352	Ldhd
Zfp97	0.0108104	0.516162	0.505352	Zfp97
Ndst1	0.0108104	0.516162	0.505352	Ndst1
Napepld	0.0108104	0.516162	0.505352	Napepld
Pabpn1	0.205702	0.710949	0.505247	Pabpn1
Sipa1l3	0.111714	0.615878	0.504164	Sipa1l3
Pde9a	0.215151	0.718823	0.503672	Pde9a
Aars	0.0525198	0.556018	0.503498	Aars
Armcx3	0.0526326	0.556018	0.503386	Armcx3
Dohh	0.260536	0.76377	0.503234	Dohh
Wbp2	0.558663	1.06176	0.503092	Wbp2
Med18	0.0533403	0.556018	0.502678	Med18
Prdx3	0.690078	1.1926	0.502523	Prdx3
Wdr92	0.179148	0.681446	0.502298	Wdr92
Stard7	0.286086	0.788212	0.502127	Stard7
Rxrb	0.118871	0.620697	0.501827	Rxrb
Wdr74	0.0542291	0.556018	0.501789	Wdr74
Mbtd1	0.054946	0.556018	0.501072	Mbtd1
Slc35e4	0.423949	0.924227	0.500278	Slc35e4
Ccdc93	0.120567	0.620697	0.50013	Ccdc93
Paqr7	0.405182	0.905276	0.500094	Paqr7
Crebrf	0.2198	0.718823	0.499023	Crebrf
Nuf2	1.14373	1.64253	0.498798	Nuf2
Baiap2	0.689265	1.1877	0.498434	Baiap2
Zbtb8b	0.0579805	0.556018	0.498038	Zbtb8b
Tnip2	0.0579805	0.556018	0.498038	Tnip2
Nemp1	0.123106	0.620697	0.497591	Nemp1
Golim4	0.239173	0.7367	0.497527	Golim4
Hist3h2a	0.44057	0.938079	0.497509	Hist3h2a
Golga7	0.450949	0.947859	0.49691	Golga7
Actr1b	0.149531	0.646372	0.496841	Actr1b
Vpreb3	0.32259	0.819313	0.496724	Vpreb3
Gm10073	0.222203	0.718835	0.496632	Gm10073
Flnc	0.242138	0.738715	0.496576	Flnc
Mat2a	0.44647	0.942718	0.496248	Mat2a
Fn3krp	0.0598803	0.556018	0.496138	Fn3krp
Gpm6b	1.50075	1.99663	0.49588	Gpm6b
Gulp1	0.0926055	0.588376	0.49577	Gulp1
Coq10a	0.0215053	0.516162	0.494657	Coq10a
Elp6	0.0215053	0.516162	0.494657	Elp6
Pcnx	0.0215053	0.516162	0.494657	Pcnx
Tmem67	0.81158	1.30544	0.49386	Tmem67
Smchd1	0.481967	0.975434	0.493468	Smchd1
Acad8	0.1881	0.681446	0.493346	Acad8
Cd55	0.572561	1.06585	0.493287	Cd55
Mfge8	0.277111	0.769915	0.492804	Mfge8
Uhrf1bp1	0.159653	0.652019	0.492366	Uhrf1bp1
Eva1c	0.0640289	0.556018	0.491989	Eva1c
Zfp131	0.193344	0.685057	0.491714	Zfp131
mt-Cytb	4.34027	4.83139	0.491115	mt-Cytb
Capn2	0.220102	0.710949	0.490847	Capn2
Nup98	0.169829	0.660369	0.49054	Nup98
Bnip3l	1.16026	1.65047	0.490212	Bnip3l
Mia3	0.387123	0.877335	0.490211	Mia3
Iqcc	0.370381	0.860503	0.490122	Iqcc
Wdr91	0.159111	0.648847	0.489736	Wdr91
Col4a2	0.162518	0.652019	0.489502	Col4a2
Rpl9-ps1	0.163169	0.652019	0.48885	Rpl9-ps1
Bnip1	0.0671826	0.556018	0.488836	Bnip1
Rhno1	0.163963	0.652019	0.488057	Rhno1
Zfp811	0.0681851	0.556018	0.487833	Zfp811
Snhg20	0.831265	1.31901	0.487744	Snhg20
Ank	0.24422	0.731512	0.487292	Ank
Nenf	1.56701	2.05401	0.486995	Nenf
Taf1c	0.0292823	0.516162	0.48688	Taf1c
Gm26660	0.0292823	0.516162	0.48688	Gm26660
Adssl1	0.0292823	0.516162	0.48688	Adssl1
Slc35a4	0.0292823	0.516162	0.48688	Slc35a4
Tank	0.126021	0.612589	0.486568	Tank
Rgl1	0.0694908	0.556018	0.486527	Rgl1
Bcl2l1	0.471189	0.957632	0.486443	Bcl2l1
Atad2	0.0697419	0.556018	0.486276	Atad2
Itga4	0.0698647	0.556018	0.486154	Itga4
Chaf1a	0.646104	1.13213	0.486021	Chaf1a
Egln2	0.2689	0.754853	0.485953	Egln2
Exosc8	0.2176	0.703543	0.485943	Exosc8
Pink1	1.17892	1.66427	0.485348	Pink1
Agpat5	0.163547	0.648847	0.4853	Agpat5
Adpgk	0.0308956	0.516162	0.485266	Adpgk
Zfp142	0.0308956	0.516162	0.485266	Zfp142
Rfx5	0.0308956	0.516162	0.485266	Rfx5
Il11ra1	0.552644	1.03788	0.485232	Il11ra1
Gm3764	0.0987053	0.583385	0.484679	Gm3764
Mvb12b	0.390163	0.874803	0.48464	Mvb12b
Herpud2	0.140032	0.624534	0.484502	Herpud2
Ext1	0.201355	0.685057	0.483702	Ext1
Sptan1	1.07642	1.55954	0.483129	Sptan1
Mtmr9	0.129529	0.612589	0.48306	Mtmr9
Pnrc2	0.389662	0.871817	0.482155	Pnrc2
Trim59	0.0341554	0.516162	0.482007	Trim59
Tfip11	0.0345617	0.516162	0.4816	Tfip11
Lnpk	0.142943	0.624534	0.481591	Lnpk
Mgrn1	0.170863	0.652019	0.481156	Mgrn1
Ndrg4	0.0354788	0.516162	0.480683	Ndrg4
1700017B05Rik	0.0354788	0.516162	0.480683	1700017B05Rik
4930523C07Rik	0.526568	1.0072	0.48063	4930523C07Rik
Nfe2l2	0.169134	0.648847	0.479713	Nfe2l2
Nt5c	0.87782	1.35692	0.479096	Nt5c
Tmem243	0.557316	1.03641	0.479092	Tmem243
Ube2e3	0.540097	1.01889	0.478788	Ube2e3
Lmntd1	0.0780425	0.556018	0.477976	Lmntd1
Tcp11l2	0.891686	1.36944	0.477752	Tcp11l2
Uggt2	0.13505	0.612589	0.477539	Uggt2
Dhx9	0.500466	0.977216	0.47675	Dhx9
Mapk6	0.0397824	0.516162	0.47638	Mapk6
Dnah9	0.989422	1.46555	0.476129	Dnah9
Numbl	0.0803245	0.556018	0.475694	Numbl
Atad1	0.29445	0.769915	0.475465	Atad1
Wdr82	0.0806498	0.556018	0.475368	Wdr82
Dazap2	0.764756	1.23995	0.475197	Dazap2
Ak8	0.677891	1.15293	0.475038	Ak8
Cbarp	0.23601	0.710949	0.474939	Cbarp
Zmynd10	1.16047	1.6353	0.474838	Zmynd10
Stxbp2	0.0413789	0.516162	0.474783	Stxbp2
Zfp653	0.0413789	0.516162	0.474783	Zfp653
Coq8a	0.0413789	0.516162	0.474783	Coq8a
Mcrs1	0.439483	0.914203	0.47472	Mcrs1
Taok1	0.882629	1.35734	0.474709	Taok1
Tmem106c	0.876347	1.35093	0.47458	Tmem106c
Pgap2	0.109079	0.583385	0.474306	Pgap2
Sacm1l	0.19972	0.673922	0.474202	Sacm1l
Phlpp2	0.0819672	0.556018	0.474051	Phlpp2
Urod	0.531802	1.00497	0.473172	Urod
Ankrd54	0.610272	1.08299	0.472716	Ankrd54
Tshz1	0.176824	0.648847	0.472023	Tshz1
Nsg2	0.278638	0.749263	0.470626	Nsg2
Rbsn	0.211	0.681446	0.470447	Rbsn
Uso1	0.214634	0.685057	0.470423	Uso1
Rasgrp1	0.0459144	0.516284	0.47037	Rasgrp1
Bcl9l	0.0459144	0.516162	0.470248	Bcl9l
Cmtm3	0.162395	0.63256	0.470165	Cmtm3
Stxbp1	0.0858624	0.556018	0.470156	Stxbp1
Gatad2a	0.238002	0.707959	0.469957	Gatad2a
Matr3	0.701099	1.1708	0.469702	Matr3
Smim1	0.30035	0.769915	0.469565	Smim1
C1qb	0.146706	0.615878	0.469173	C1qb
Pemt	0.0477847	0.516162	0.468377	Pemt
Sphk2	0.152444	0.620697	0.468254	Sphk2
Gcnt2	0.566023	1.03425	0.468226	Gcnt2
Nelfb	0.415519	0.883478	0.467959	Nelfb
Dnmt3a	0.462771	0.930513	0.467742	Dnmt3a
Plscr2	0.242431	0.710044	0.467613	Plscr2
Tusc2	0.27879	0.746385	0.467596	Tusc2
Ftsj3	0.048686	0.516162	0.467476	Ftsj3
Zbtb37	0.14848	0.615878	0.467399	Zbtb37
Dennd6b	0.0488321	0.516162	0.46733	Dennd6b
Zfp275	0.0488321	0.516162	0.46733	Zfp275
Pax6	0.058658	0.525842	0.467184	Pax6
Gramd1c	0.214307	0.681446	0.46714	Gramd1c
Saysd1	0.182004	0.648847	0.466844	Saysd1
Dnaja2	0.400639	0.867372	0.466734	Dnaja2
Ppp1r37	0.218842	0.685057	0.466215	Ppp1r37
Zfp719	0.0501734	0.516162	0.465989	Zfp719
H2afy2	0.207901	0.673817	0.465916	H2afy2
Eif2s3y	0.293984	0.759594	0.46561	Eif2s3y
Ppp2r2c	0.24555	0.710949	0.465399	Ppp2r2c
Ski	0.344714	0.809969	0.465255	Ski
Rnf149	0.0912155	0.556018	0.464803	Rnf149
Fads2	0.0913556	0.556018	0.464663	Fads2
Rap1gds1	0.0519112	0.516162	0.464251	Rap1gds1
Arf4	0.160225	0.623973	0.463748	Arf4
Tgfbr1	0.0526326	0.516162	0.463529	Tgfbr1
Eed	0.188983	0.652019	0.463037	Eed
Cdc26	0.625925	1.08858	0.462653	Cdc26
Tor1b	0.448957	0.911251	0.462293	Tor1b
Agtrap	0.339378	0.801457	0.462078	Agtrap
Sirt1	0.0541801	0.516162	0.461982	Sirt1
Gm20604	0.0943905	0.556018	0.461628	Gm20604
Rdh14	0.246397	0.707959	0.461562	Rdh14
Fam219a	0.151264	0.612589	0.461325	Fam219a
Anapc5	0.756236	1.21644	0.4602	Anapc5
Atad2b	0.164468	0.624534	0.460066	Atad2b
Basp1	0.0562422	0.516162	0.45992	Basp1
Nlgn2	0.189066	0.648847	0.459781	Nlgn2
Lin54	0.0962435	0.556018	0.459775	Lin54
Tmem30a	0.362471	0.821867	0.459396	Tmem30a
Zfp287	0.097236	0.556018	0.458782	Zfp287
Psmd1	0.501217	0.959847	0.45863	Psmd1
Slc39a6	0.154272	0.612589	0.458317	Slc39a6
Tmem263	0.0579805	0.516162	0.458181	Tmem263
Steap3	0.125207	0.583385	0.458178	Steap3
C230035I16Rik	0.154463	0.612589	0.458126	C230035I16Rik
Suclg1	0.988094	1.44597	0.457873	Suclg1
Ext2	0.125537	0.583385	0.457848	Ext2
Ran	1.35232	1.81008	0.457754	Ran
Ntrk2	2.30619	2.7631	0.456911	Ntrk2
Psap	2.15547	2.6122	0.456725	Psap
Capns1	1.0811	1.53753	0.456429	Capns1
Zmpste24	0.415397	0.871817	0.45642	Zmpste24
Phlpp1	0	0.45637	0.45637	Phlpp1
Usp43	0.16436	0.620697	0.456337	Usp43
Dhx57	0.0598803	0.516162	0.456282	Dhx57
Abhd17a	0.389363	0.845525	0.456162	Abhd17a
Fbrs	0.164791	0.620697	0.455906	Fbrs
Pigo	0.100124	0.556018	0.455894	Pigo
Gde1	0.751194	1.20685	0.455659	Gde1
Kmt2b	0.100542	0.556018	0.455476	Kmt2b
Golga2	0.161097	0.615878	0.454781	Golga2
Slc9a1	0.101361	0.556018	0.454657	Slc9a1
Ppp2r1b	0.0621776	0.516162	0.453984	Ppp2r1b
Dhcr7	0.0624682	0.516162	0.453694	Dhcr7
Rasa1	0.320534	0.774047	0.453514	Rasa1
Sec61a2	0.254744	0.707958	0.453214	Sec61a2
Lmf2	0.283635	0.7367	0.453066	Lmf2
Tesk1	0.103199	0.556018	0.452819	Tesk1
Rsl24d1	0.43933	0.891847	0.452516	Rsl24d1
P4ha2	0.104672	0.556018	0.451346	P4ha2
Nisch	0.50903	0.960257	0.451227	Nisch
Igbp1	0.337806	0.788825	0.45102	Igbp1
Scamp2	0.164931	0.615878	0.450948	Scamp2
Map4	0.470922	0.921812	0.45089	Map4
Zfp260	0.21177	0.662556	0.450786	Zfp260
Rnf26	0.0656386	0.516162	0.450523	Rnf26
Ppp4r3a	0.231767	0.681446	0.449679	Ppp4r3a
Fez2	0.121662	0.571051	0.449389	Fez2
Uba3	0.175411	0.624534	0.449123	Uba3
Tubb2a	0.70931	1.15834	0.449031	Tubb2a
4921524J17Rik	0.202995	0.652019	0.449024	4921524J17Rik
Gramd3	0.0580933	0.506634	0.448541	Gramd3
Rps6ka2	0.394154	0.84245	0.448296	Rps6ka2
Afg3l2	0.262789	0.710949	0.44816	Afg3l2
Luzp2	0.135485	0.583385	0.4479	Luzp2
Dlgap4	0.447069	0.894661	0.447591	Dlgap4
Aldh2	0.731055	1.17862	0.447566	Aldh2
Pwp1	0.136406	0.583385	0.446979	Pwp1
Agfg2	0.169132	0.615878	0.446746	Agfg2
Mrpl2	0.577639	1.02423	0.44659	Mrpl2
Flrt1	0.0697419	0.516162	0.44642	Flrt1
Tor1aip2	0.238738	0.685057	0.446319	Tor1aip2
Zfp317	0.0698647	0.516162	0.446297	Zfp317
Slc38a3	0.66595	1.1119	0.445953	Slc38a3
Mob2	0.170204	0.615878	0.445674	Mob2
Ubap2l	0.406835	0.852411	0.445576	Ubap2l
Ebna1bp2	0.390982	0.83596	0.444977	Ebna1bp2
Slc7a7	0.138441	0.583385	0.444943	Slc7a7
Kifc3	0.167892	0.612589	0.444697	Kifc3
Pex19	0.271457	0.716003	0.444546	Pex19
Zfp523	0.10294	0.547484	0.444544	Zfp523
Lcat	0.0717074	0.516162	0.444455	Lcat
Gm4419	0.111897	0.556018	0.444121	Gm4419
Ankrd35	0.0721851	0.516162	0.443977	Ankrd35
Cpne8	0.287695	0.731512	0.443817	Cpne8
Cnn3	2.2734	2.71711	0.443711	Cnn3
Ehbp1l1	0.669294	1.11252	0.443223	Ehbp1l1
Elf2	0.205911	0.648847	0.442936	Elf2
Med23	0.0734629	0.516162	0.442699	Med23
Cdk8	0.113359	0.556018	0.44266	Cdk8
Immt	0.452526	0.894335	0.44181	Immt
Kif26b	0.171057	0.612589	0.441532	Kif26b
Cdk14	0.210572	0.652019	0.441447	Cdk14
Six3	0.0519112	0.493184	0.441273	Six3
2610035D17Rik	0.236274	0.676912	0.440638	2610035D17Rik
Fmo5	0.350489	0.790973	0.440484	Fmo5
Cds2	0.0757195	0.516162	0.440442	Cds2
Zfp445	0.307019	0.747259	0.44024	Zfp445
Gabrb1	0.14361	0.583385	0.439775	Gabrb1
Slc12a4	0.302482	0.742125	0.439643	Slc12a4
Faap100	0.0766965	0.516162	0.439466	Faap100
Ppil2	0.357273	0.796112	0.438839	Ppil2
Otud4	0.185785	0.624534	0.438749	Otud4
Pip4k2c	0.117433	0.556018	0.438586	Pip4k2c
Alyref2	0.221933	0.660369	0.438436	Alyref2
Rtl8a	0.581882	1.02013	0.438249	Rtl8a
Zdhhc7	0.117861	0.556018	0.438157	Zdhhc7
Tom1l2	0.146577	0.583385	0.436808	Tom1l2
Klc1	0.244906	0.681446	0.43654	Klc1
Ift52	0.524455	0.960874	0.436418	Ift52
Csnk1d	0.270808	0.706547	0.435738	Csnk1d
Wsb1	0.120346	0.556018	0.435672	Wsb1
Zfp423	0.447982	0.883563	0.435581	Zfp423
Rapgefl1	0.120525	0.556018	0.435493	Rapgefl1
Fcer1g	0.120558	0.556018	0.43546	Fcer1g
Vit	0.901426	1.33659	0.43516	Vit
Kantr	0.211302	0.646372	0.43507	Kantr
Gpc4	0.276654	0.711475	0.434821	Gpc4
Lin7c	0.433065	0.867621	0.434555	Lin7c
Hadh	0.560994	0.995336	0.434341	Hadh
Cdyl	0.0818577	0.516162	0.434304	Cdyl
Npl	0.280171	0.714455	0.434284	Npl
Rnf139	0.214701	0.648847	0.434146	Rnf139
Dgcr8	0.0829679	0.516162	0.433194	Dgcr8
B3galnt1	0.179644	0.612589	0.432945	B3galnt1
Rora	0.598342	1.03076	0.432414	Rora
Dnajb9	0.327506	0.759594	0.432088	Dnajb9
Shprh	0.0862136	0.516162	0.429948	Shprh
Arpc1b	0.126106	0.556018	0.429912	Arpc1b
St3gal5	0	0.429902	0.429902	St3gal5
Zfp975	0	0.429902	0.429902	Zfp975
Mrps30	0.304653	0.734433	0.42978	Mrps30
Cnot6l	0.0926115	0.521499	0.428888	Cnot6l
Bptf	0.669276	1.09789	0.428616	Bptf
Sephs1	0.142597	0.571051	0.428454	Sephs1
Amer2	0.547135	0.975443	0.428308	Amer2
Ubr7	0.127858	0.556018	0.42816	Ubr7
Ppp4c	0.286436	0.714455	0.428019	Ppp4c
Yaf2	0.277724	0.705625	0.427901	Yaf2
Ttc19	0.224218	0.652019	0.427802	Ttc19
Eif2s2	0.932523	1.36028	0.427759	Eif2s2
Zdhhc1	0.376713	0.804181	0.427468	Zdhhc1
Clip3	0.291694	0.718823	0.427129	Clip3
Enpp2	0.185516	0.612589	0.427073	Enpp2
Mtus1	0.399623	0.826381	0.426758	Mtus1
Olfml3	0.129384	0.556018	0.426634	Olfml3
Ppm1g	0.45205	0.87865	0.4266	Ppm1g
3110082I17Rik	0.336014	0.762435	0.42642	3110082I17Rik
Mmp15	0.129748	0.556018	0.42627	Mmp15
Fbxo44	0.330764	0.756746	0.425982	Fbxo44
Pcdhb7	0.130147	0.556018	0.425872	Pcdhb7
Ptpn13	0.130268	0.556018	0.42575	Ptpn13
Hk1	0.504904	0.930513	0.425609	Hk1
Dusp14	1.1659	1.59125	0.425351	Dusp14
Mvb12a	0.365625	0.790973	0.425348	Mvb12a
Papd7	0.130787	0.556018	0.425231	Papd7
Dnaaf3	0.5082	0.93341	0.42521	Dnaaf3
Pnpo	0.331763	0.756746	0.424983	Pnpo
Zfp827	0.196046	0.620697	0.424651	Zfp827
Vps29	0.374068	0.798243	0.424175	Vps29
Ift140	0.339752	0.76377	0.424018	Ift140
Utp18	0.0789505	0.502965	0.424014	Utp18
Fktn	0.200837	0.624534	0.423697	Fktn
Tspan15	1.00381	1.42726	0.423445	Tspan15
Adat1	0.0927821	0.516162	0.42338	Adat1
Creb3l2	0.0108104	0.433849	0.423039	Creb3l2
Dld	0.470885	0.893897	0.423013	Dld
Zcchc10	0.13335	0.556018	0.422668	Zcchc10
Ubr3	0.133475	0.556018	0.422544	Ubr3
Cfap54	1.59893	2.02145	0.422517	Cfap54
Snx5	0.685053	1.10728	0.422227	Snx5
Xrn1	0.317628	0.739606	0.421979	Xrn1
Dgcr6	1.32806	1.74962	0.421568	Dgcr6
Fem1c	0.135165	0.556018	0.420853	Fem1c
Purb	0.428526	0.849357	0.420832	Purb
Erlin2	0.239811	0.660369	0.420559	Erlin2
Coil	0.200149	0.620697	0.420549	Coil
Syt11	0.582894	1.00342	0.420529	Syt11
Ogfod2	0.256715	0.676912	0.420197	Ogfod2
Tagln3	0.0961355	0.516162	0.420026	Tagln3
Rab7	0.798546	1.21818	0.419629	Rab7
Cabin1	0.488258	0.907732	0.419474	Cabin1
Plin3	0.471994	0.891417	0.419423	Plin3
Rbp1	0.792695	1.2121	0.419402	Rbp1
Ppp2ca	0.522439	0.941602	0.419163	Ppp2ca
Tsc22d2	0.0108104	0.429902	0.419092	Tsc22d2
Ncor2	0.32535	0.744375	0.419025	Ncor2
Ly6h	1.54649	1.96532	0.418835	Ly6h
Arhgef2	0.128795	0.547484	0.41869	Arhgef2
Keap1	0.1721	0.590712	0.418612	Keap1
Cpne3	0.398657	0.81663	0.417974	Cpne3
Tmem39b	0.108272	0.525842	0.41757	Tmem39b
Cnot11	0.06278	0.480326	0.417546	Cnot11
Slc30a1	0.165872	0.583385	0.417513	Slc30a1
Dkc1	0.139249	0.556018	0.416769	Dkc1
2810459M11Rik	0.0637547	0.480326	0.416571	2810459M11Rik
Trmt2b	0.099606	0.516162	0.416556	Trmt2b
Ankrd10	0.208525	0.624534	0.416009	Ankrd10
Kif13b	0.140262	0.556018	0.415756	Kif13b
Togaram1	0.303769	0.719445	0.415676	Togaram1
Dixdc1	0.261278	0.676912	0.415634	Dixdc1
Ttc30a1	0.236437	0.652019	0.415583	Ttc30a1
Xxylt1	0	0.415372	0.415372	Xxylt1
Gtpbp2	0.168333	0.583385	0.415052	Gtpbp2
Ncoa6	0.168479	0.583385	0.414906	Ncoa6
Btbd9	0.201044	0.615878	0.414834	Btbd9
Fam13b	0.101752	0.516162	0.41441	Fam13b
Pde6d	0.995277	1.40953	0.414251	Pde6d
Scfd1	0.234825	0.648847	0.414022	Scfd1
Metap1	0.102201	0.516162	0.413961	Metap1
Nbr1	0.434255	0.848132	0.413877	Nbr1
Tm9sf1	0.20207	0.615878	0.413808	Tm9sf1
Jup	0.384977	0.798243	0.413266	Jup
Ddx39	0.103199	0.516162	0.412963	Ddx39
Ccdc43	0.170541	0.583385	0.412844	Ccdc43
Mrpl21	0.716661	1.12948	0.412817	Mrpl21
Naa35	0.548369	0.96098	0.412611	Naa35
Fjx1	0.349136	0.761563	0.412427	Fjx1
Fbxo28	0.143679	0.556018	0.412339	Fbxo28
Rassf1	0.171429	0.583385	0.411955	Rassf1
Iqsec1	0.273129	0.685057	0.411928	Iqsec1
Tmem123	0.668091	1.07995	0.411857	Tmem123
mt-Co3	4.72486	5.1364	0.411542	mt-Co3
Memo1	0	0.411351	0.411351	Memo1
Lrpap1	0.590008	1.0012	0.411192	Lrpap1
Ndufs8	0.607061	1.01783	0.410772	Ndufs8
Hdac8	0.210138	0.620697	0.410559	Hdac8
Tmem39a	0.105668	0.516162	0.410494	Tmem39a
Mrpl17	0.971058	1.38078	0.409725	Mrpl17
Ifngr1	0.662232	1.07137	0.409143	Ifngr1
Maml2	0.302544	0.710949	0.408405	Maml2
Nt5dc3	0.313932	0.722302	0.40837	Nt5dc3
Emx2os	0.147808	0.556018	0.40821	Emx2os
Notch2	0.10823	0.516162	0.407932	Notch2
Zfp740	0.120193	0.52759	0.407398	Zfp740
Acrbp	0.109216	0.516162	0.406946	Acrbp
Twnk	0.149312	0.556018	0.406706	Twnk
Baz1b	0.41102	0.817455	0.406435	Baz1b
Ywhaz	0.459006	0.865064	0.406059	Ywhaz
Ikbkap	0.301978	0.707958	0.40598	Ikbkap
Gpi1	1.01752	1.42344	0.405916	Gpi1
Ei24	0.970851	1.37655	0.405699	Ei24
Psme2b	0.150689	0.556018	0.405329	Psme2b
Gabpb2	0.111134	0.516162	0.405028	Gabpb2
Rbm7	0.485314	0.890232	0.404918	Rbm7
Dpy19l4	0.244902	0.649514	0.404612	Dpy19l4
Kcnc2	0.281017	0.685057	0.40404	Kcnc2
S100a4	0.221213	0.625229	0.404016	S100a4
Gpaa1	0.310574	0.714455	0.403881	Gpaa1
Cep57	0.127445	0.531171	0.403726	Cep57
Gng12	0.0767381	0.480326	0.403588	Gng12
Aen	0.20937	0.612589	0.403219	Aen
Cryab	1.07369	1.47649	0.402791	Cryab
U2af2	0.582576	0.985342	0.402766	U2af2
Sugp1	0.180705	0.583385	0.40268	Sugp1
Nsmce3	0.210146	0.612589	0.402443	Nsmce3
Phf21a	0.357209	0.759594	0.402386	Phf21a
Dars	0.63982	1.0421	0.402281	Dars
Slfn5	0.18154	0.583385	0.401845	Slfn5
Phlda3	0.520638	0.922238	0.4016	Phlda3
Map7d1	0.275329	0.676912	0.401583	Map7d1
Sucla2	0.596587	0.997505	0.400918	Sucla2
Itgb5	0.259586	0.660369	0.400783	Itgb5
Slc44a1	0.276246	0.676912	0.400665	Slc44a1
Celsr1	0.409825	0.809969	0.400145	Celsr1
Tiparp	0.285131	0.685057	0.399926	Tiparp
Nckap5	0.220813	0.620697	0.399884	Nckap5
Tacc2	0.703686	1.10318	0.399492	Tacc2
Gm2a	0.494939	0.894306	0.399367	Gm2a
U2af1	0.994058	1.39307	0.399011	U2af1
Gli3	0.117395	0.516162	0.398767	Gli3
Acadvl	0.726337	1.1246	0.398266	Acadvl
Brap	0.118115	0.516162	0.398047	Brap
Mepce	0.126501	0.523997	0.397496	Mepce
Ralgps1	0.119193	0.516162	0.396969	Ralgps1
Ccdc73	0.128475	0.525102	0.396626	Ccdc73
Plxnb1	0.228608	0.624534	0.395926	Plxnb1
Eif3b	0.287718	0.683587	0.395869	Eif3b
P2rx4	0.378256	0.774047	0.395792	P2rx4
Sco2	0.285838	0.681446	0.395608	Sco2
Anapc4	0.120671	0.516162	0.395491	Anapc4
Acot8	0.0308956	0.425939	0.395043	Acot8
Eml1	0.188538	0.583385	0.394847	Eml1
Osbpl5	0.26553	0.660369	0.394839	Osbpl5
Nelfcd	0.401338	0.796112	0.394773	Nelfcd
Pef1	0.209183	0.603941	0.394758	Pef1
Vdac1	1.00396	1.39861	0.394654	Vdac1
Dok1	0.0354788	0.429902	0.394423	Dok1
Rcc2	0.476562	0.870619	0.394057	Rcc2
Msantd4	0.404414	0.798243	0.393829	Msantd4
Kcnk2	0.877837	1.27165	0.393817	Kcnk2
Cln3	0.258463	0.652019	0.393556	Cln3
Tanc1	0.162723	0.556018	0.393296	Tanc1
Clns1a	0.16541	0.558445	0.393035	Clns1a
Tbcel	0.873636	1.26605	0.392411	Tbcel
Esyt2	0.453282	0.845525	0.392243	Esyt2
Ddt	0.703868	1.09586	0.391994	Ddt
Pdhb	0.427472	0.819313	0.391842	Pdhb
Mycbpap	0.969663	1.3615	0.391833	Mycbpap
1700003F12Rik	0.0341554	0.425939	0.391784	1700003F12Rik
Yipf6	0.124797	0.516162	0.391365	Yipf6
Atp6v0a1	0.125046	0.516162	0.391116	Atp6v0a1
mt-Atp6	4.90263	5.29366	0.391027	mt-Atp6
Srsf11	0.749282	1.14019	0.390912	Srsf11
Tmtc4	0.229793	0.620697	0.390904	Tmtc4
Evi5	0.752402	1.14305	0.390647	Evi5
Nck2	0	0.390635	0.390635	Nck2
Neu1	0.328521	0.718823	0.390302	Neu1
Ikbip	0.395855	0.786059	0.390204	Ikbip
Nbl1	0.166044	0.556018	0.389975	Nbl1
Slc25a18	1.46058	1.85053	0.389951	Slc25a18
Lyst	0.166082	0.556018	0.389936	Lyst
Cdh2	0.357435	0.747259	0.389823	Cdh2
Glo1	1.04883	1.43859	0.389766	Glo1
Trappc4	0.404645	0.794302	0.389658	Trappc4
Lmbr1	0.166372	0.556018	0.389646	Lmbr1
A830018L16Rik	0.100124	0.489465	0.389341	A830018L16Rik
Bag2	0.527816	0.917074	0.389258	Bag2
Hfe	0.404494	0.793725	0.389231	Hfe
Sf3b1	1.00225	1.39094	0.388691	Sf3b1
Xpnpep3	0.127592	0.516162	0.38857	Xpnpep3
Rrbp1	1.22966	1.61759	0.387932	Rrbp1
Atp5f1	1.39423	1.78162	0.387389	Atp5f1
Tpm3	0.658381	1.04532	0.386941	Tpm3
Mrpl38	0.693314	1.08002	0.386703	Mrpl38
Cd2bp2	0.129627	0.516162	0.386535	Cd2bp2
Mlc1	2.01674	2.40325	0.386512	Mlc1
Paqr4	0.0577314	0.444224	0.386493	Paqr4
Nme6	0.314754	0.700632	0.385878	Nme6
Suds3	0.988896	1.37387	0.384974	Suds3
Cdkn1b	0.423202	0.808174	0.384972	Cdkn1b
6430573P05Rik	0.0354788	0.419377	0.383898	6430573P05Rik
Qrich1	0.132322	0.516162	0.38384	Qrich1
Mrgbp	0.199718	0.583385	0.383667	Mrgbp
Nhlrc2	0.132961	0.516162	0.383201	Nhlrc2
Atp6v1a	0.469373	0.852411	0.383038	Atp6v1a
Senp5	0.133648	0.516162	0.382514	Senp5
Usp48	0.263972	0.646372	0.3824	Usp48
Sqle	0.652487	1.03425	0.381762	Sqle
Mybbp1a	0.329357	0.710949	0.381592	Mybbp1a
Zswim7	0.0240064	0.405527	0.38152	Zswim7
Pcnt	0.279086	0.660369	0.381283	Pcnt
Nadk2	0.429003	0.810061	0.381058	Nadk2
Dsg2	0.443747	0.824536	0.380789	Dsg2
4732440D04Rik	0.235521	0.615878	0.380357	4732440D04Rik
Prkaa1	0.135812	0.516162	0.38035	Prkaa1
Gkap1	0.4854	0.865718	0.380318	Gkap1
Smg1	0.175795	0.556018	0.380223	Smg1
Tapbp	0.220471	0.600612	0.380141	Tapbp
Abcc5	0.579781	0.959847	0.380066	Abcc5
Slc39a12	0.389884	0.769915	0.380031	Slc39a12
Cp	0.431472	0.811356	0.379884	Cp
Rbpj	0.176142	0.556018	0.379876	Rbpj
Rrs1	0.208578	0.588376	0.379798	Rrs1
Mtus2	0.203632	0.583385	0.379752	Mtus2
Eya3	0	0.379686	0.379686	Eya3
Ssna1	0.542609	0.921822	0.379213	Ssna1
Hs3st1	0.245638	0.624534	0.378896	Hs3st1
Gnl1	0.306317	0.685057	0.37874	Gnl1
Fbxo25	0.147181	0.525842	0.378662	Fbxo25
Ankrd49	0.237326	0.615878	0.378552	Ankrd49
Hbp1	0.298381	0.676912	0.378531	Hbp1
Med13l	0.189099	0.56761	0.378512	Med13l
Usp14	0.0819393	0.460215	0.378275	Usp14
Aagab	0.17787	0.556018	0.378148	Aagab
Cyfip2	0.234837	0.6127	0.377863	Cyfip2
C1qbp	0.50165	0.87917	0.377521	C1qbp
Ddit3	0.0554079	0.432639	0.377231	Ddit3
Nrtn	0.0341554	0.411351	0.377195	Nrtn
Cited2	0.207246	0.583385	0.376139	Cited2
Prpf38b	0.418103	0.79421	0.376107	Prpf38b
Scarb1	0.42257	0.798379	0.375809	Scarb1
Zmiz1	0.18611	0.561917	0.375807	Zmiz1
Lrrc8d	0.245077	0.620697	0.375621	Lrrc8d
Tgfb1i1	0	0.375518	0.375518	Tgfb1i1
Sugct	0	0.375518	0.375518	Sugct
Fbxl20	0.180543	0.556018	0.375475	Fbxl20
Foxj3	0.285072	0.660369	0.375297	Foxj3
Rpl39	1.94215	2.31682	0.374668	Rpl39
Trappc2	0.274205	0.648847	0.374642	Trappc2
Krit1	0.306952	0.681446	0.374494	Krit1
Pak4	0.181751	0.556018	0.374267	Pak4
Rubcn	0.209233	0.583385	0.374152	Rubcn
Gnaz	0.654263	1.02809	0.373831	Gnaz
C230072F16Rik	1.16627	1.54009	0.373822	C230072F16Rik
Sun1	0.407583	0.781359	0.373776	Sun1
Ppfibp2	0.0215053	0.39474	0.373235	Ppfibp2
Zranb1	0.183059	0.556018	0.37296	Zranb1
Tfcp2	0.309093	0.681446	0.372353	Tfcp2
Svbp	0.319392	0.691679	0.372287	Svbp
Gstz1	0.339285	0.711475	0.37219	Gstz1
Btbd6	0.184364	0.556018	0.371655	Btbd6
Anapc1	0.774906	1.14649	0.371584	Anapc1
Ifit2	0.144849	0.516162	0.371313	Ifit2
Diaph3	0.340689	0.710949	0.37026	Diaph3
Creb3l1	0.290167	0.660369	0.370202	Creb3l1
Usp1	0.0741723	0.444224	0.370052	Usp1
Rpl12	1.34694	1.71681	0.369876	Rpl12
Tmod1	0.489214	0.858924	0.36971	Tmod1
Chst11	0.279308	0.648847	0.369539	Chst11
Bccip	0.123683	0.493184	0.369502	Bccip
Rsrc2	0.939709	1.30906	0.369353	Rsrc2
Lamtor3	0.424754	0.793725	0.368971	Lamtor3
Plagl2	0.0108104	0.379686	0.368875	Plagl2
Itm2a	0.134268	0.502965	0.368696	Itm2a
Tspan31	0.308268	0.676912	0.368644	Tspan31
Cox7a2l	1.09535	1.46374	0.368388	Cox7a2l
Zfp326	0.232348	0.600612	0.368264	Zfp326
Epc1	0.339934	0.707959	0.368025	Epc1
Ecd	0.102528	0.470321	0.367792	Ecd
Foxj1	1.74736	2.11508	0.367715	Foxj1
Cep135	0.188309	0.556018	0.367709	Cep135
Sema3e	0.215852	0.583385	0.367533	Sema3e
Ccdc191	0.959769	1.32724	0.367471	Ccdc191
Coq4	0.419778	0.78691	0.367132	Coq4
Znhit2	0.582493	0.949491	0.366997	Znhit2
Eef1akmt1	0.0933897	0.460215	0.366825	Eef1akmt1
Hsdl2	0.279697	0.646372	0.366675	Hsdl2
Pbx2	0.189449	0.556018	0.366569	Pbx2
Zfp110	0.149835	0.516162	0.366327	Zfp110
Igf1r	0.566035	0.931651	0.365616	Igf1r
Capn15	0.150565	0.516162	0.365597	Capn15
Tmcc3	0.404446	0.769915	0.365469	Tmcc3
Trappc12	0.0499205	0.415372	0.365451	Trappc12
Trim23	0.0579805	0.423366	0.365385	Trim23
Leprotl1	0.346631	0.711475	0.364844	Leprotl1
Cirbp	0.802372	1.16718	0.364809	Cirbp
Dzip3	0.562182	0.92698	0.364798	Dzip3
Sap30l	0.0108104	0.375518	0.364708	Sap30l
Tbl3	0.0108104	0.375518	0.364708	Tbl3
Ctsz	0.599025	0.963711	0.364686	Ctsz
Aebp1	1.99268	2.35682	0.364144	Aebp1
Gpr137b	0.192167	0.556018	0.363851	Gpr137b
Tex2	0.0308956	0.39474	0.363844	Tex2
H13	0.552082	0.915818	0.363736	H13
Ccdc127	0.45618	0.819785	0.363606	Ccdc127
Pak3	0.0477847	0.41135	0.363566	Pak3
Pigf	0.196991	0.560228	0.363237	Pigf
Dnah7a	0.257536	0.620697	0.363161	Dnah7a
Arfip2	0.220353	0.583385	0.363031	Arfip2
Tvp23b	0.617213	0.979502	0.362288	Tvp23b
Pfdn1	0.897134	1.25925	0.362119	Pfdn1
2610001J05Rik	0.741086	1.10318	0.362092	2610001J05Rik
Wdr1	0.400508	0.762435	0.361927	Wdr1
Asnsd1	0.057762	0.419377	0.361615	Asnsd1
Wdr5	0.154908	0.516162	0.361254	Wdr5
Amotl1	0.35007	0.710949	0.360879	Amotl1
Tspan9	0.0341554	0.39474	0.360585	Tspan9
Dph5	0.0341554	0.39474	0.360585	Dph5
Smc5	0.155656	0.516162	0.360506	Smc5
Fam234b	0.195513	0.556018	0.360505	Fam234b
Phkb	0.316453	0.676912	0.360459	Phkb
Tpd52	0.196657	0.556018	0.359361	Tpd52
Gtf2e2	0.157099	0.516162	0.359063	Gtf2e2
Rint1	0.111403	0.470321	0.358917	Rint1
Farp1	0.157446	0.516162	0.358716	Farp1
Stox2	0.506364	0.865064	0.3587	Stox2
AI314180	0.19741	0.556018	0.358608	AI314180
E130114P18Rik	0.363719	0.722302	0.358582	E130114P18Rik
1110034G24Rik	0.157984	0.516162	0.358178	1110034G24Rik
Gm19935	2.27136	2.62949	0.358128	Gm19935
Tjp1	0.254483	0.612589	0.358106	Tjp1
Smco4	0.158427	0.516284	0.357857	Smco4
Ywhae	2.18492	2.54256	0.357632	Ywhae
Hdhd2	0.649762	1.0072	0.357435	Hdhd2
Tmem65	0.180854	0.538132	0.357278	Tmem65
Foxp4	0.158933	0.516162	0.357229	Foxp4
Srebf2	0.465365	0.82246	0.357095	Srebf2
Ints3	0.159394	0.516162	0.356768	Ints3
2410004P03Rik	1.54278	1.89932	0.356547	2410004P03Rik
Ncs1	0.463428	0.819785	0.356357	Ncs1
Usp4	0.317466	0.673817	0.356351	Usp4
Mblac1	0.05913	0.415372	0.356242	Mblac1
Rpl7a	1.22081	1.57692	0.356113	Rpl7a
Ldlrad3	0.160092	0.516162	0.35607	Ldlrad3
Stt3a	0.26856	0.624534	0.355974	Stt3a
Timm22	0.268626	0.624534	0.355908	Timm22
Mvk	0.0635921	0.419377	0.355785	Mvk
Nmt1	0.0747169	0.429902	0.355185	Nmt1
Bach1	0.0354788	0.390635	0.355156	Bach1
Tm2d3	0.628038	0.98307	0.355032	Tm2d3
Cmtm4	0.484872	0.839829	0.354957	Cmtm4
Arl6ip5	0.786614	1.14152	0.354903	Arl6ip5
Tmem59l	0.389664	0.744375	0.354711	Tmem59l
Sept10	0.201323	0.556018	0.354695	Sept10
Morf4l2	0.933121	1.28779	0.354667	Morf4l2
Rrm1	0.0754221	0.429902	0.35448	Rrm1
Otud1	0.266326	0.62071	0.354384	Otud1
Aldh6a1	0.357342	0.711475	0.354133	Aldh6a1
Nog	0	0.354038	0.354038	Nog
Lgmn	0.853965	1.20723	0.353263	Lgmn
Polr3gl	0.163085	0.516162	0.353077	Polr3gl
Rnf8	0.262841	0.615878	0.353037	Rnf8
Magohb	0.163178	0.516162	0.352984	Magohb
Gm6297	0.163446	0.516162	0.352716	Gm6297
Spred1	0.299319	0.652019	0.352701	Spred1
Tspoap1	0.204	0.556018	0.352018	Tspoap1
Zfp825	0.231973	0.583385	0.351411	Zfp825
1110065P20Rik	0.26118	0.612589	0.351409	1110065P20Rik
Atp9a	0.269776	0.620697	0.350922	Atp9a
Cdhr4	1.47937	1.82971	0.350342	Cdhr4
Atp1a1	1.64562	1.99559	0.349974	Atp1a1
Rccd1	0.206108	0.556018	0.34991	Rccd1
Ube2d1	0.247887	0.597272	0.349385	Ube2d1
Prr3	0.234052	0.583385	0.349332	Prr3
Ccdc3	0.717148	1.06622	0.349068	Ccdc3
Gab1	0.242821	0.591746	0.348925	Gab1
Acyp1	0.694341	1.04318	0.348842	Acyp1
Jkamp	0.365845	0.714455	0.34861	Jkamp
Nras	0.243831	0.592438	0.348608	Nras
Srrm1	0.862406	1.2108	0.348398	Srrm1
Pin1	0.283249	0.631567	0.348318	Pin1
Numa1	0.272612	0.62071	0.348098	Numa1
Flvcr1	0.333623	0.681446	0.347823	Flvcr1
Ifitm3	2.29225	2.63994	0.347692	Ifitm3
Npc2	0.384258	0.731611	0.347353	Npc2
Rabl6	0.484237	0.831567	0.347331	Rabl6
Abca1	0.416587	0.76377	0.347183	Abca1
Ccdc47	0.637809	0.984942	0.347133	Ccdc47
D10Wsu102e	0.209029	0.556018	0.346989	D10Wsu102e
Stmn2	0.209256	0.556018	0.346762	Stmn2
Pdlim4	0.909615	1.2562	0.346585	Pdlim4
Lpar4	0.0862276	0.432639	0.346411	Lpar4
4833420G17Rik	0.471107	0.817455	0.346348	4833420G17Rik
2610044O15Rik8	0.274543	0.620697	0.346154	2610044O15Rik8
Ubqln1	0.124227	0.470321	0.346094	Ubqln1
Rhobtb1	0.170433	0.516162	0.345729	Rhobtb1
Prkd3	0.170693	0.516162	0.345469	Prkd3
Skiv2l	0.452992	0.798243	0.345251	Skiv2l
Ctdspl	0.171147	0.516162	0.345015	Ctdspl
Josd2	0.624952	0.969832	0.34488	Josd2
Mipep	0.951093	1.29587	0.344774	Mipep
Esf1	0.42255	0.767191	0.344641	Esf1
Mfap1b	0.410607	0.754853	0.344245	Mfap1b
Ttc26	0.212002	0.556018	0.344016	Ttc26
Tmem176b	0.740894	1.08478	0.343882	Tmem176b
Mtf1	0.280694	0.624534	0.34384	Mtf1
Gon7	0.305219	0.648847	0.343629	Gon7
Gabarapl1	0.969144	1.31227	0.343121	Gabarapl1
Ttll1	0.212939	0.556018	0.34308	Ttll1
Nfrkb	0	0.342679	0.342679	Nfrkb
Pim1	0	0.342679	0.342679	Pim1
Map2k5	0.213488	0.556018	0.34253	Map2k5
Tmed10	1.25165	1.59399	0.342335	Tmed10
Izumo4	0.318098	0.660369	0.342271	Izumo4
Rgma	0.47041	0.81267	0.34226	Rgma
Copb2	0.470551	0.81267	0.342119	Copb2
Tsc22d1	0.903895	1.24584	0.341945	Tsc22d1
Dhrs7b	0.548315	0.890193	0.341878	Dhrs7b
Dnpep	0.174658	0.516162	0.341504	Dnpep
Mark2	0.359185	0.70053	0.341345	Mark2
Arhgap5	1.75504	2.09614	0.341102	Arhgap5
Adprm	0.283527	0.624534	0.341007	Adprm
Kmt2a	0.549866	0.890193	0.340326	Kmt2a
Nek8	0.0358138	0.375518	0.339704	Nek8
Pecam1	0.371978	0.711475	0.339497	Pecam1
Otub1	0.468844	0.808174	0.33933	Otub1
Capn10	0.321161	0.660369	0.339208	Capn10
Mthfd2l	0.645997	0.984839	0.338841	Mthfd2l
Tlk1	0.21749	0.556018	0.338528	Tlk1
1700041G16Rik	0.217496	0.556018	0.338522	1700041G16Rik
Vangl1	0.589838	0.928194	0.338355	Vangl1
Psmd9	0.993362	1.33158	0.338217	Psmd9
Kcnip4	0.178148	0.516162	0.338014	Kcnip4
Gbf1	0.373005	0.710949	0.337944	Gbf1
Ccdc136	0.262771	0.600612	0.337841	Ccdc136
Plcd3	0.186618	0.523997	0.337379	Plcd3
Ctnnal1	0.115476	0.452511	0.337035	Ctnnal1
Sugt1	1.13258	1.46932	0.336742	Sugt1
Nebl	0.614792	0.95124	0.336448	Nebl
Stk33	0.528753	0.865064	0.336311	Stk33
Fam168a	0.312643	0.648847	0.336204	Fam168a
Nbn	0.179968	0.516162	0.336194	Nbn
Med8	0.338387	0.673817	0.335431	Med8
Gm47438	0.354199	0.689567	0.335368	Gm47438
Scyl1	0.248238	0.583385	0.335147	Scyl1
Tdrd7	0.280906	0.615878	0.334973	Tdrd7
Cd47	0.652173	0.987107	0.334934	Cd47
2310034G01Rik	0.277685	0.612589	0.334904	2310034G01Rik
Cryzl1	0.737636	1.07246	0.334823	Cryzl1
Npepl1	0.259293	0.594074	0.334781	Npepl1
Rtn1	1.06845	1.40288	0.334429	Rtn1
mt-Co2	3.66518	3.99957	0.334394	mt-Co2
Fnta	0.624406	0.958652	0.334246	Fnta
Timm21	0.312939	0.646372	0.333432	Timm21
Rab3ip	0.081987	0.415372	0.333385	Rab3ip
Atat1	0.509385	0.84245	0.333065	Atat1
Snph	0.0577314	0.390635	0.332903	Snph
Tkt	1.23692	1.56965	0.332732	Tkt
A330048O09Rik	0.19615	0.528691	0.332541	A330048O09Rik
Herc1	0.280665	0.612589	0.331924	Herc1
Hist1h1c	1.58934	1.92123	0.331887	Hist1h1c
Gabrr2	0.184603	0.516162	0.331559	Gabrr2
Nub1	0.289177	0.620697	0.331521	Nub1
Src	0.05913	0.390635	0.331505	Src
Zc3h7b	0.224922	0.556018	0.331096	Zc3h7b
Rheb	1.10009	1.43118	0.331093	Rheb
mt-Atp8	0.284825	0.615878	0.331053	mt-Atp8
Cebpb	0.0637547	0.39474	0.330985	Cebpb
Pik3ip1	0.571396	0.902179	0.330783	Pik3ip1
Plscr4	0.225735	0.556018	0.330283	Plscr4
Rock2	0.0754438	0.405527	0.330083	Rock2
Prelid3b	0.186117	0.516162	0.330045	Prelid3b
Zbtb33	0.0240064	0.354039	0.330032	Zbtb33
Phf12	0.186233	0.516162	0.329929	Phf12
Taf3	0.226127	0.556018	0.329891	Taf3
Malsu1	0.126714	0.45637	0.329656	Malsu1
Bcl6b	0.186574	0.516162	0.329588	Bcl6b
Pea15a	0.650125	0.979212	0.329087	Pea15a
Slc4a2	0.35253	0.681446	0.328917	Slc4a2
Ppp6r3	0.332007	0.660369	0.328362	Ppp6r3
Bcl2l12	0.228113	0.556018	0.327905	Bcl2l12
Pdk2	0.157859	0.485731	0.327873	Pdk2
Med22	0.0477847	0.375518	0.327733	Med22
K230010J24Rik	0.383385	0.710949	0.327564	K230010J24Rik
Ap3m2	0.663969	0.991332	0.327364	Ap3m2
Dusp3	0.566701	0.893784	0.327083	Dusp3
Nmrk1	0.189245	0.516162	0.326917	Nmrk1
Btbd1	0.502638	0.829506	0.326868	Btbd1
Fyb	0.0954304	0.422142	0.326712	Fyb
Tpgs1	0.829424	1.15609	0.326662	Tpgs1
Cd83	0.229452	0.556018	0.326567	Cd83
Iqcb1	0.428384	0.754853	0.326469	Iqcb1
Mdm2	0.772006	1.09782	0.325817	Mdm2
Mrpl12	0.592641	0.918248	0.325607	Mrpl12
Zfp451	0.190958	0.516162	0.325204	Zfp451
Canx	1.26463	1.5896	0.324975	Canx
Nsfl1c	0.897753	1.22268	0.324923	Nsfl1c
Zmiz2	0.191389	0.516162	0.324773	Zmiz2
Prrg2	0	0.324676	0.324676	Prrg2
Itga5	0	0.324676	0.324676	Itga5
Arpc1a	0.824439	1.14817	0.323728	Arpc1a
4930402H24Rik	1.04522	1.36871	0.323491	4930402H24Rik
Ivns1abp	1.64281	1.9663	0.323485	Ivns1abp
Cant1	0.192784	0.516162	0.323378	Cant1
Sec31a	0.301176	0.624534	0.323358	Sec31a
Mal	0.130003	0.452511	0.322508	Mal
Slc11a2	0.233698	0.556018	0.32232	Slc11a2
Flywch1	0.777993	1.10021	0.322213	Flywch1
Syn2	0.0579805	0.379686	0.321705	Syn2
Marcksl1	0.608204	0.929867	0.321663	Marcksl1
Thap3	1.05145	1.3728	0.321349	Thap3
Scn1b	0.0734629	0.39474	0.321277	Scn1b
Ago2	0.234767	0.556018	0.321251	Ago2
Ndufv1	0.562386	0.883563	0.321177	Ndufv1
Scpep1	0.262738	0.583385	0.320647	Scpep1
Crem	0.195751	0.516162	0.320411	Crem
Emp1	0.0598803	0.379686	0.319805	Emp1
Rfx7	0.0628632	0.382563	0.3197	Rfx7
Utp23	0.23641	0.556018	0.319609	Utp23
Chmp7	0.296337	0.615878	0.319542	Chmp7
Uqcc1	0.293242	0.612589	0.319347	Uqcc1
Retsat	0.458107	0.77734	0.319233	Retsat
Ank2	0.332948	0.652019	0.319071	Ank2
Fhl1	1.96957	2.28857	0.319002	Fhl1
Tomm34	0.520853	0.839829	0.318976	Tomm34
Nat9	0.550436	0.869388	0.318952	Nat9
Rnaset2a	0.0871609	0.405527	0.318366	Rnaset2a
Creb3	0.366852	0.685057	0.318205	Creb3
Id1	0.178701	0.49689	0.318189	Id1
Atp5g1	1.33849	1.65668	0.318186	Atp5g1
Imp4	0.359062	0.676912	0.317849	Imp4
Sh3bgrl3	0.714357	1.03216	0.317802	Sh3bgrl3
Ubald1	0.238234	0.556018	0.317785	Ubald1
March6	0.265616	0.583385	0.317768	March6
Spen	0.238273	0.556018	0.317746	Spen
Sfr1	0.946218	1.26384	0.31762	Sfr1
Raly	0.274861	0.592438	0.317578	Raly
Npnt	0.308869	0.626228	0.317359	Npnt
Cnpy2	1.29972	1.6168	0.31708	Cnpy2
Slc43a3	0.366528	0.683587	0.317059	Slc43a3
Kctd1	0.421832	0.738726	0.316894	Kctd1
Cspg5	0.058658	0.375518	0.31686	Cspg5
Pxn	0.560527	0.877335	0.316808	Pxn
Sorbs2	0.741862	1.05862	0.316761	Sorbs2
Fam104a	0.450604	0.767096	0.316492	Fam104a
Papola	0.846465	1.16265	0.316183	Papola
S100a16	0.874932	1.19084	0.315908	S100a16
Degs1	0.477992	0.793725	0.315733	Degs1
Txndc15	0.906425	1.22207	0.315641	Txndc15
Hist2h2aa2	0.200923	0.516162	0.315239	Hist2h2aa2
Birc6	0.240925	0.556018	0.315094	Birc6
Dcaf4	0.191839	0.506634	0.314796	Dcaf4
Ttc27	0.241635	0.556018	0.314383	Ttc27
Dpm1	0.575399	0.889678	0.31428	Dpm1
Thg1l	0.337767	0.652019	0.314253	Thg1l
Polr1c	0.528258	0.84245	0.314193	Polr1c
Mpst	0.474807	0.788825	0.314018	Mpst
Clock	0.499251	0.81267	0.313419	Clock
Mpdu1	0.520196	0.83341	0.313214	Mpdu1
Trappc3	0.650234	0.963303	0.313069	Trappc3
Trim44	0.278694	0.591746	0.313052	Trim44
Rbmx	0.333447	0.646479	0.313032	Rbmx
Car11	0	0.312976	0.312976	Car11
Smap1	0.106889	0.419377	0.312488	Smap1
Tgm2	0.372613	0.685057	0.312444	Tgm2
Eif4g2	1.35737	1.66973	0.312358	Eif4g2
Klhl13	0.542927	0.855	0.312073	Klhl13
Mul1	0.300755	0.6127	0.311945	Mul1
Nptn	0.312749	0.624534	0.311785	Nptn
Rab6a	0.496459	0.808185	0.311726	Rab6a
Myl12a	1.32684	1.63853	0.311691	Myl12a
Parp4	0.204485	0.516162	0.311677	Parp4
Extl2	0.273454	0.584995	0.311541	Extl2
Acadl	0.39237	0.703543	0.311173	Acadl
Arl2bp	0.813277	1.124	0.310728	Arl2bp
Tdrkh	0.245612	0.556018	0.310406	Tdrkh
Tmem216	0.661694	0.972057	0.310363	Tmem216
Sik3	0.206262	0.516162	0.3099	Sik3
Abca2	0.206282	0.516162	0.30988	Abca2
Mycbp2	0.484704	0.793725	0.309021	Mycbp2
Ubtf	0.177148	0.485731	0.308583	Ubtf
Mtg1	0	0.30852	0.30852	Mtg1
Samd4	0	0.30852	0.30852	Samd4
Csf1r	0	0.30852	0.30852	Csf1r
3110082J24Rik	0	0.30852	0.30852	3110082J24Rik
Hdac1	0.615953	0.924227	0.308275	Hdac1
Plcd4	0.493796	0.801457	0.307661	Plcd4
Lmo4	1.5437	1.851	0.307297	Lmo4
Thap11	0.152988	0.460215	0.307226	Thap11
Arih1	0.0354788	0.342679	0.3072	Arih1
Sgsm1	0.276269	0.583385	0.307116	Sgsm1
Add3	0.617605	0.924652	0.307048	Add3
Cpq	0.308957	0.615878	0.306922	Cpq
Scamp3	0.133762	0.440318	0.306556	Scamp3
Ccdc81	0.891886	1.19843	0.306542	Ccdc81
Cdv3	0.314354	0.620697	0.306344	Cdv3
Sec11c	0.924269	1.2295	0.305228	Sec11c
Zkscan3	0.307502	0.612589	0.305087	Zkscan3
Foxk1	0.251146	0.556018	0.304872	Foxk1
Mbd5	0.211539	0.516162	0.304623	Mbd5
N4bp2l2	0.614848	0.919391	0.304542	N4bp2l2
Leo1	0.151933	0.45637	0.304437	Leo1
Nnat	3.85705	4.16088	0.303827	Nnat
Ltbp3	0.230859	0.534576	0.303717	Ltbp3
Hpgds	0.140531	0.444224	0.303694	Hpgds
Lrba	0.136775	0.440318	0.303543	Lrba
Tm9sf4	0.573384	0.876889	0.303505	Tm9sf4
Efcab7	0.0913556	0.39474	0.303384	Efcab7
Chtop	0.519488	0.82246	0.302972	Chtop
Pgd	0.321579	0.624534	0.302955	Pgd
1110008F13Rik	0.495374	0.798243	0.302869	1110008F13Rik
Dnajc13	0.31808	0.620697	0.302617	Dnajc13
Zc2hc1c	0.346443	0.648847	0.302404	Zc2hc1c
Nectin3	0.183363	0.485731	0.302368	Nectin3
Ash1l	0.75997	1.06212	0.302147	Ash1l
Lrp1	0.371683	0.673817	0.302135	Lrp1
Tsc22d4	1.43039	1.73242	0.302026	Tsc22d4
Marf1	0.0818577	0.383836	0.301978	Marf1
Plxnb2	0.929561	1.23151	0.30195	Plxnb2
Rgs3	0.168601	0.470321	0.30172	Rgs3
Hs2st1	0.311223	0.612589	0.301366	Hs2st1
Cep128	0.465415	0.766598	0.301184	Cep128
Fundc2	0.682253	0.983368	0.301115	Fundc2
Zbtb38	0.159253	0.460215	0.300962	Zbtb38
Polr2i	1.02905	1.32955	0.300497	Polr2i
Ulk2	0.589805	0.890232	0.300427	Ulk2
Plce1	0.597577	0.897985	0.300409	Plce1
BC051142	0.234206	0.534576	0.30037	BC051142
Il18	0.237787	0.538132	0.300345	Il18
Aldoc	1.11515	1.41529	0.30014	Aldoc
Slc25a17	0.335649	0.635784	0.300135	Slc25a17
Nkd2	0	0.299755	0.299755	Nkd2
Naa50	0.40854	0.707959	0.299419	Naa50
Sat1	0.756731	1.05615	0.299417	Sat1
Mcfd2	0.0914939	0.390635	0.299141	Mcfd2
Slc25a23	0.284264	0.583385	0.299121	Slc25a23
Ciao1	0.217054	0.516162	0.299108	Ciao1
Tigd5	0.0767381	0.375518	0.29878	Tigd5
Fam102a	0.272675	0.571051	0.298376	Fam102a
Adhfe1	0.158508	0.45637	0.297862	Adhfe1
Clcn4	0.640822	0.938498	0.297676	Clcn4
Lmo7	0.335641	0.63256	0.296919	Lmo7
Gm4707	0	0.296629	0.296629	Gm4707
Rpl22	1.49091	1.7872	0.296288	Rpl22
Tnks2	0.411995	0.707959	0.295963	Tnks2
Ap4m1	0.220241	0.516162	0.295921	Ap4m1
Cyp20a1	0.220252	0.516162	0.29591	Cyp20a1
Dnaaf5	0.0948901	0.390635	0.295745	Dnaaf5
Acaa1a	0.848901	1.14456	0.295655	Acaa1a
Dedd	0.0292823	0.324676	0.295394	Dedd
Hist2h3c2	0.126906	0.422142	0.295236	Hist2h3c2
Slc25a21	0.124323	0.419377	0.295054	Slc25a21
Hsph1	1.36643	1.66058	0.294153	Hsph1
Tob1	0.669324	0.963303	0.293979	Tob1
Tysnd1	0.0308956	0.324676	0.293781	Tysnd1
Bbs4	0.425192	0.71897	0.293778	Bbs4
Lrrc73	0.470805	0.764364	0.293559	Lrrc73
Rae1	0.790092	1.08362	0.293529	Rae1
Vwa5b1	0.476586	0.769915	0.293329	Vwa5b1
Lsm12	0.33124	0.624534	0.293294	Lsm12
Serp1	0.679482	0.972134	0.292653	Serp1
Chd1l	0.0980867	0.390635	0.292548	Chd1l
Plekhf1	0	0.292099	0.292099	Plekhf1
Snx20	0	0.292099	0.292099	Snx20
4930480K23Rik	0	0.292099	0.292099	4930480K23Rik
Celf1	0.393309	0.685057	0.291748	Celf1
Tln2	0.252255	0.543962	0.291707	Tln2
Mtss1	0.161169	0.452511	0.291342	Mtss1
Tmem19	0.2121	0.502965	0.290865	Tmem19
Tox	0.15341	0.444224	0.290815	Tox
Cmc1	0.329989	0.620697	0.290709	Cmc1
Washc2	0.325279	0.615878	0.290599	Washc2
Otud7b	0.292889	0.583385	0.290495	Otud7b
Impact	0.302298	0.591746	0.289448	Impact
Mrpl55	0.699427	0.988684	0.289257	Mrpl55
Arl4c	0.267005	0.556018	0.289014	Arl4c
Ubqln2	0.294408	0.583385	0.288977	Ubqln2
Mpi	0.0240064	0.312976	0.28897	Mpi
Dpf2	0.392591	0.681446	0.288855	Dpf2
Ddx24	0.638737	0.927575	0.288838	Ddx24
Paics	0.538932	0.827756	0.288824	Paics
Cs	0.273515	0.561917	0.288402	Cs
Ube2m	0.256098	0.543962	0.287864	Ube2m
Rnft2	0.0252717	0.312976	0.287704	Rnft2
Tcf4	0.975775	1.26345	0.287675	Tcf4
Gm17750	0.38936	0.677016	0.287656	Gm17750
Htra2	0.0881369	0.375518	0.287381	Htra2
Ttc14	0.670255	0.957632	0.287377	Ttc14
Plekhb1	1.33091	1.61753	0.286625	Plekhb1
Ap3s2	0.118915	0.405527	0.286612	Ap3s2
Tmem126a	0.229744	0.516284	0.28654	Tmem126a
Acot6	0.514935	0.801457	0.286522	Acot6
Selenof	1.72737	2.01375	0.286385	Selenof
Mpv17	0.508172	0.79421	0.286037	Mpv17
St6gal1	0.399103	0.685057	0.285954	St6gal1
Eef1a1	2.55727	2.84319	0.285923	Eef1a1
Pdia4	1.41131	1.69715	0.285844	Pdia4
Fbxw7	0.119751	0.405526	0.285775	Fbxw7
Mgat5	0.284321	0.569377	0.285056	Mgat5
Rif1	0.38885	0.673817	0.284967	Rif1
Gmppb	0.0948901	0.379686	0.284796	Gmppb
Cog2	0.0240064	0.30852	0.284514	Cog2
Parn	0.168081	0.452511	0.28443	Parn
Gpc6	0.23179	0.516162	0.284372	Gpc6
Surf4	0.219628	0.502965	0.283337	Surf4
Rab12	0.183351	0.466515	0.283164	Rab12
Polr3h	1.42099	1.70391	0.282919	Polr3h
Aasdhppt	0.420769	0.703543	0.282774	Aasdhppt
Agl	0.233473	0.516162	0.282689	Agl
Cacfd1	0.398965	0.681446	0.282481	Cacfd1
Grcc10	0.897929	1.18016	0.282232	Grcc10
Dedd2	0.301172	0.583385	0.282213	Dedd2
Phtf1	0.866629	1.14876	0.282131	Phtf1
Cdh22	0.0308956	0.312976	0.28208	Cdh22
Actr3	0.58401	0.865515	0.281505	Actr3
Mall	0.0108104	0.292099	0.281289	Mall
Jam3	0.749499	1.03065	0.281149	Jam3
Slc5a3	0.185439	0.466515	0.281077	Slc5a3
Gm20594	0.463456	0.744375	0.280919	Gm20594
Rab3gap2	0.113871	0.39474	0.280869	Rab3gap2
Akirin1	0.65582	0.936429	0.280609	Akirin1
Snx17	0.785312	1.06592	0.280607	Snx17
Srrm2	1.51908	1.79966	0.280579	Srrm2
Tgfbr2	0.340238	0.620697	0.280459	Tgfbr2
Tmem246	0.225356	0.505509	0.280153	Tmem246
Gas2l1	0.639867	0.919928	0.280061	Gas2l1
Chd5	0.405016	0.685057	0.280041	Chd5
Dalrd3	1.43598	1.71594	0.279964	Dalrd3
Rpgrip1	0.380715	0.660369	0.279654	Rpgrip1
Nicn1	0.321096	0.600612	0.279516	Nicn1
Kcnmb1	0.782533	1.06183	0.279293	Kcnmb1
Dph3	0.507777	0.787003	0.279226	Dph3
Acaa2	0.841264	1.1203	0.279033	Acaa2
Lcorl	0.0459144	0.324676	0.278762	Lcorl
Zfp655	0.277351	0.556018	0.278667	Zfp655
BC022687	0.593828	0.872381	0.278553	BC022687
Gfap	0.252788	0.531171	0.278383	Gfap
Hmgcll1	0.0215053	0.299755	0.27825	Hmgcll1
Tbccd1	0.228403	0.506634	0.278232	Tbccd1
Phip	0.869918	1.14811	0.278192	Phip
Trpm7	0.547017	0.824536	0.27752	Trpm7
Crb2	0.323276	0.600612	0.277336	Crb2
Acbd6	0.272606	0.549918	0.277312	Acbd6
Ccnc	0.343468	0.620697	0.27723	Ccnc
Gprasp2	0.189534	0.466515	0.276981	Gprasp2
Wbp1	0.542799	0.819324	0.276525	Wbp1
Paip1	0.0252717	0.301137	0.275866	Paip1
Gnpnat1	0.227128	0.502965	0.275836	Gnpnat1
Trhde	0.344929	0.620697	0.275768	Trhde
Hspa9	0.937314	1.21292	0.275603	Hspa9
Gsn	2.63624	2.91184	0.275598	Gsn
Mrps22	0.104124	0.379686	0.275561	Mrps22
Slc25a3	1.58343	1.85897	0.275543	Slc25a3
Srek1	0.608695	0.884006	0.275311	Srek1
Rfx4	0.2653	0.540589	0.275289	Rfx4
Erg28	0.325344	0.600612	0.275268	Erg28
Aurkaip1	0.751294	1.02641	0.275115	Aurkaip1
Abhd3	0.750534	1.02496	0.27443	Abhd3
Acp2	0.101361	0.375518	0.274157	Acp2
Carhsp1	0.482842	0.756746	0.273904	Carhsp1
Tnrc6c	0.42675	0.70053	0.27378	Tnrc6c
Tmem47	2.29377	2.56755	0.273778	Tmem47
Prpf6	0.434234	0.707958	0.273724	Prpf6
Abcd3	0.618306	0.891847	0.273541	Abcd3
Ciapin1	0.141854	0.415372	0.273517	Ciapin1
Aifm1	0.156775	0.429902	0.273127	Aifm1
Ppp2r2a	0.243256	0.516162	0.272906	Ppp2r2a
Eno1b	0.0358138	0.30852	0.272707	Eno1b
Gimap9	0.0240064	0.296629	0.272622	Gimap9
Mobp	0.469587	0.742125	0.272538	Mobp
Wasl	0.374306	0.646372	0.272066	Wasl
Uqcrc1	1.15175	1.4237	0.271946	Uqcrc1
Mrpl54	0.494704	0.76661	0.271906	Mrpl54
Bbc3	0.244578	0.516162	0.271584	Bbc3
Selenop	0.363272	0.634795	0.271523	Selenop
Cyth2	0.562697	0.833321	0.270624	Cyth2
Mtch1	0.414749	0.685057	0.270308	Mtch1
Kiz	0.433293	0.703543	0.27025	Kiz
Lrig1	0.0308956	0.301137	0.270242	Lrig1
Lpp	0.0308956	0.301137	0.270242	Lpp
Bet1	0.325171	0.595104	0.269933	Bet1
Wscd1	0.135615	0.405527	0.269911	Wscd1
Lrp10	0.395859	0.665685	0.269826	Lrp10
Csnk1a1	1.20632	1.47614	0.26982	Csnk1a1
Gnpda2	0.174468	0.444224	0.269757	Gnpda2
2310011J03Rik	0.322148	0.591746	0.269598	2310011J03Rik
Abi2	0.114575	0.383836	0.269261	Abi2
Ppp1r2	0.924626	1.19389	0.26926	Ppp1r2
Med29	0.301798	0.571051	0.269253	Med29
D430019H16Rik	0.125537	0.39474	0.269203	D430019H16Rik
Nxpe4	0.254982	0.523997	0.269015	Nxpe4
Traf5	0	0.268729	0.268729	Traf5
Coa7	0	0.268729	0.268729	Coa7
Ttc13	0	0.268729	0.268729	Ttc13
Kctd12	0	0.268729	0.268729	Kctd12
Map2k3	0	0.268729	0.268729	Map2k3
Stxbp3	0.560849	0.829506	0.268657	Stxbp3
Zcrb1	0.447367	0.716003	0.268636	Zcrb1
Aff4	0.344196	0.612589	0.268393	Aff4
Copz1	0.761982	1.03009	0.268108	Copz1
Lats2	0.137645	0.405527	0.267881	Lats2
Hdac5	0.192777	0.460215	0.267437	Hdac5
Gpm6a	0.799537	1.06694	0.2674	Gpm6a
Zdhhc6	0.316019	0.583385	0.267366	Zdhhc6
Zfp180	0.0341554	0.301137	0.266982	Zfp180
Zfp930	0.177913	0.444224	0.266311	Zfp930
Per3	0.595629	0.861821	0.266192	Per3
Ubac2	0.522218	0.788212	0.265995	Ubac2
Ucma	0.22359	0.489465	0.265875	Ucma
Mcm7	0.290172	0.556018	0.265846	Mcm7
Ythdf2	0.164347	0.429902	0.265555	Ythdf2
Hddc3	0.513386	0.778794	0.265408	Hddc3
Lamp2	0.46613	0.731512	0.265382	Lamp2
Spag7	0.441274	0.706547	0.265273	Spag7
Cul3	0.347417	0.612589	0.265172	Cul3
Stmnd1	1.07536	1.34048	0.265119	Stmnd1
Arhgap42	0.110508	0.375518	0.26501	Arhgap42
Ckb	3.2487	3.51347	0.264771	Ckb
Gmfb	0.297565	0.561917	0.264352	Gmfb
Gpx1	0.597428	0.861292	0.263863	Gpx1
Zzz3	0.0608653	0.324676	0.263811	Zzz3
Uba5	0.298216	0.561917	0.263701	Uba5
Zfp449	0.252465	0.516162	0.263697	Zfp449
Lrrc45	0.90337	1.16671	0.263335	Lrrc45
Fggy	0.162656	0.425939	0.263283	Fggy
Hydin	1.012	1.27511	0.263108	Hydin
mt-Nd1	3.65865	3.92163	0.26298	mt-Nd1
Slc9a3r2	0.243759	0.506634	0.262875	Slc9a3r2
Ddhd1	0.253463	0.516162	0.262699	Ddhd1
Tceal3	0.725891	0.988381	0.26249	Tceal3
Smyd5	0.0341554	0.296629	0.262473	Smyd5
Socs1	0.0341554	0.296629	0.262473	Socs1
Txndc17	0.389644	0.652019	0.262376	Txndc17
Hspa8	2.45752	2.71981	0.262289	Hspa8
Zfp706	0.916015	1.17829	0.262277	Zfp706
Dmac2	0.240804	0.502965	0.26216	Dmac2
Pawr	0.143486	0.405527	0.26204	Pawr
Med14	0.0354788	0.296629	0.26115	Med14
Ctsl	0.985179	1.24614	0.260963	Ctsl
Pex1	0.0477847	0.30852	0.260736	Pex1
Kif9	0.840092	1.1008	0.26071	Kif9
Las1l	0.506405	0.767096	0.260691	Las1l
Ccng1	0.330074	0.590712	0.260638	Ccng1
Gatad2b	0.385847	0.646372	0.260525	Gatad2b
Brk1	1.06755	1.32802	0.260466	Brk1
Kcnb1	0.25587	0.516162	0.260292	Kcnb1
Akap9	1.19287	1.45316	0.260282	Akap9
A630089N07Rik	0.0644718	0.324676	0.260204	A630089N07Rik
2610301B20Rik	0.935761	1.19578	0.26002	2610301B20Rik
Tbrg1	0.622791	0.882801	0.26001	Tbrg1
Gstm1	3.08068	3.34065	0.259969	Gstm1
Klf6	0.425178	0.685057	0.259879	Klf6
Hgh1	0.0413789	0.301137	0.259758	Hgh1
Dnajc28	0.0488321	0.30852	0.259688	Dnajc28
Prelid2	0.0533403	0.312976	0.259636	Prelid2
Avpi1	1.22551	1.48512	0.259616	Avpi1
Zmat2	1.06261	1.3222	0.259595	Zmat2
Adcy6	0.17063	0.429902	0.259272	Adcy6
Ntpcr	0.170764	0.429902	0.259138	Ntpcr
Pacrg	1.08306	1.34171	0.25865	Pacrg
Fam32a	0.78986	1.0484	0.258538	Fam32a
Ndufa11	1.50108	1.75903	0.257948	Ndufa11
Arf1	1.26759	1.52519	0.257597	Arf1
Sp3	0.358369	0.615878	0.257509	Sp3
Dnah12	2.17894	2.43615	0.257214	Dnah12
Meis1	0.0813121	0.338354	0.257042	Meis1
Rnf11	0.482514	0.739324	0.25681	Rnf11
Eif4a1	0.756418	1.01313	0.256715	Eif4a1
Rap2c	0.0354788	0.292099	0.256621	Rap2c
Mapt	0.0354788	0.292099	0.25662	Mapt
Palld	0.242679	0.499281	0.256602	Palld
Chordc1	0.573023	0.829595	0.256573	Chordc1
Dennd5a	0.274556	0.531008	0.256451	Dennd5a
Arl5b	0	0.256352	0.256352	Arl5b
Mknk1	0	0.256352	0.256352	Mknk1
Yars	0	0.256352	0.256352	Yars
Pom121	0	0.256352	0.256352	Pom121
Zfp383	0	0.256352	0.256352	Zfp383
Slc25a22	0	0.256352	0.256352	Slc25a22
Armc6	0	0.256352	0.256352	Armc6
Myo9b	0	0.256352	0.256352	Myo9b
Pitpnc1	0.763042	1.01917	0.25613	Pitpnc1
Tmem29	0.12645	0.382563	0.256113	Tmem29
Eef2k	0.789183	1.04525	0.256067	Eef2k
Use1	0.6778	0.933839	0.256039	Use1
Arid5b	0.0980221	0.354038	0.256016	Arid5b
Nufip2	0.0526327	0.30852	0.255888	Nufip2
Got1	0.279569	0.534576	0.255007	Got1
Nrm	0.0579805	0.312976	0.254996	Nrm
4930570G19Rik	0.0698647	0.324676	0.254812	4930570G19Rik
Pros1	0.328713	0.583385	0.254672	Pros1
Tapt1	0.261604	0.516162	0.254558	Tapt1
Hax1	0.215874	0.470321	0.254447	Hax1
Rps10	1.87304	2.12745	0.254405	Rps10
Tmem206	0.0542291	0.30852	0.254291	Tmem206
Prrc2c	0.955792	1.21008	0.25429	Prrc2c
D17H6S53E	0.0477847	0.301137	0.253353	D17H6S53E
Rc3h2	0.137377	0.390635	0.253258	Rc3h2
Alg2	0.122322	0.375518	0.253196	Alg2
Agmo	0.302886	0.556018	0.253132	Agmo
Dyrk2	0.162259	0.415372	0.253113	Dyrk2
Sdha	1.32082	1.57393	0.25311	Sdha
Cd24a	2.14572	2.39858	0.252851	Cd24a
Psmd14	0.127014	0.379686	0.252672	Psmd14
Ndufv3	1.06737	1.31987	0.252493	Ndufv3
Pgrmc1	1.11754	1.36984	0.252296	Pgrmc1
Tmbim6	1.81306	2.06489	0.251831	Tmbim6
Aldh1l1	0	0.251636	0.251636	Aldh1l1
Prss23	0	0.251636	0.251636	Prss23
Gfra2	0	0.251636	0.251636	Gfra2
Ltc4s	0	0.251636	0.251636	Ltc4s
Xpo5	0	0.251636	0.251636	Xpo5
Ppp1r21	0	0.251636	0.251636	Ppp1r21
Palm2	0	0.251636	0.251636	Palm2
Rfwd3	0.515028	0.766598	0.25157	Rfwd3
Vldlr	0.279585	0.531008	0.251423	Vldlr
Spcs3	0.264933	0.516162	0.251229	Spcs3
3110021N24Rik	0.369552	0.620697	0.251145	3110021N24Rik
Pcp4	0.203937	0.454493	0.250556	Pcp4
Smc6	0.604404	0.854912	0.250509	Smc6
Nphp3	0.539638	0.789767	0.250129	Nphp3
Itgb3bp	0.306102	0.556018	0.249916	Itgb3bp
Sorbs1	0.888874	1.13825	0.249374	Sorbs1
Bhlhe40	0.166774	0.415372	0.248597	Bhlhe40
Mtor	0.204188	0.452511	0.248322	Mtor
Sel1l	0.307756	0.556018	0.248262	Sel1l
Rbmxl1	0.48852	0.7367	0.24818	Rbmxl1
Sos1	0.0766965	0.324676	0.24798	Sos1
Hspa4l	1.68841	1.93617	0.247754	Hspa4l
Ift172	0.45582	0.703543	0.247723	Ift172
Sardh	0.0446047	0.292099	0.247495	Sardh
Nrxn2	0.49893	0.746385	0.247455	Nrxn2
Palm	0.0215053	0.268729	0.247224	Palm
Fzd3	0.995309	1.24248	0.24717	Fzd3
Wdr33	0.30914	0.556018	0.246879	Wdr33
Sh3bgrl2	0.269431	0.516162	0.246731	Sh3bgrl2
Cdk5	0.243177	0.489465	0.246288	Cdk5
Abca5	0.0459144	0.292099	0.246185	Abca5
Crtc3	0.978308	1.2244	0.246096	Crtc3
Ddhd2	0.342377	0.588376	0.245999	Ddhd2
Smad6	0.0108104	0.256352	0.245541	Smad6
Numb	0.0108104	0.256352	0.245541	Numb
Nrep	0.0108104	0.256352	0.245541	Nrep
Daam1	0.310599	0.556018	0.245419	Daam1
Psmd12	0.657892	0.903278	0.245386	Psmd12
Cfl2	0.556224	0.801549	0.245325	Cfl2
Stx4a	0.40419	0.649514	0.245324	Stx4a
Nhsl1	0.436123	0.681446	0.245323	Nhsl1
Bckdk	0.174156	0.419377	0.24522	Bckdk
Arpc5l	0.440182	0.685161	0.244978	Arpc5l
Chd9	0.499455	0.744375	0.24492	Chd9
Sfxn4	0.174529	0.419377	0.244848	Sfxn4
Rab18	0.729313	0.974036	0.244723	Rab18
Rmnd5a	0.271463	0.516162	0.244699	Rmnd5a
Srp72	0.335928	0.580101	0.244173	Srp72
Pisd	0.856126	1.10021	0.24408	Pisd
Khsrp	0.0644718	0.30852	0.244049	Khsrp
Mib2	0.3719	0.615878	0.243979	Mib2
Tmem53	0.290854	0.534576	0.243722	Tmem53
Pank1	0.21279	0.45637	0.24358	Pank1
Rbm17	0.559461	0.802876	0.243415	Rbm17
Cenpf	0.048686	0.292099	0.243413	Cenpf
Dnase1l1	0.0577314	0.301137	0.243406	Dnase1l1
Fam122a	0.417542	0.660369	0.242827	Fam122a
Gpat4	0.0538336	0.296629	0.242795	Gpat4
Prdx4	1.42495	1.66729	0.24234	Prdx4
Rbbp6	0.511687	0.753986	0.242299	Rbbp6
Gmppa	0.0706836	0.312976	0.242292	Gmppa
Nkap	0.607567	0.849357	0.24179	Nkap
Cnot10	0.505516	0.747259	0.241743	Cnot10
Jam2	0.352512	0.594074	0.241562	Jam2
Tmem222	0.436337	0.676912	0.240575	Tmem222
Cltb	0.317932	0.558445	0.240513	Cltb
Slc35b3	0.0562422	0.296629	0.240386	Slc35b3
Mrpl4	0.436883	0.676912	0.240029	Mrpl4
Txndc12	0.384596	0.624534	0.239938	Txndc12
Krcc1	0.742259	0.981979	0.23972	Krcc1
Itgav	0.0526326	0.292099	0.239467	Itgav
Unc50	0.585552	0.824536	0.238984	Unc50
Rangap1	0.381752	0.620697	0.238946	Rangap1
Sec62	1.6671	1.90602	0.238919	Sec62
Pcolce2	0.277259	0.516162	0.238903	Pcolce2
5330413P13Rik	0.5209	0.759594	0.238695	5330413P13Rik
Fubp1	0.949206	1.18776	0.238555	Fubp1
Ehd1	0.136983	0.375518	0.238535	Ehd1
Rpl5	1.61501	1.85328	0.238272	Rpl5
Slc7a2	0.289443	0.52759	0.238147	Slc7a2
Zkscan7	0.100266	0.338354	0.238087	Zkscan7
Atp6v1h	0.318096	0.556018	0.237922	Atp6v1h
Tmem201	0.0542291	0.292099	0.23787	Tmem201
Gemin6	0.0308956	0.268729	0.237833	Gemin6
Nfkb2	0.203067	0.440318	0.23725	Nfkb2
Fbxw9	0.294117	0.531008	0.236891	Fbxw9
Dennd5b	0.055344	0.292099	0.236755	Dennd5b
Lage3	0.650293	0.886965	0.236672	Lage3
Nudt16l1	0.147205	0.383836	0.236631	Nudt16l1
Lactb2	0.0718913	0.30852	0.236629	Lactb2
Tmem115	0.280325	0.516162	0.235837	Tmem115
Sart1	0.467811	0.703543	0.235732	Sart1
Myh14	0.380211	0.615878	0.235668	Myh14
Mtmr6	0.204732	0.440318	0.235586	Mtmr6
Cd81	1.96928	2.20464	0.235354	Cd81
Camta1	0.417338	0.652684	0.235347	Camta1
Fbxl3	0.267817	0.502965	0.235147	Fbxl3
Pkn1	0.0215053	0.256352	0.234846	Pkn1
Ncor1	0.463454	0.697748	0.234295	Ncor1
Emc6	0.730881	0.964812	0.233932	Emc6
Ctxn1	1.12081	1.35466	0.233855	Ctxn1
Slc31a1	0.200001	0.433849	0.233849	Slc31a1
Atp5c1	0.969271	1.20279	0.233517	Atp5c1
Gna12	0.0585888	0.292099	0.23351	Gna12
Cln5	0.210812	0.444224	0.233412	Cln5
Ciz1	0.192641	0.425939	0.233298	Ciz1
Net1	0.0753118	0.30852	0.233209	Net1
Fbl	0.474757	0.707959	0.233201	Fbl
Ttc39b	0.05913	0.292099	0.232969	Ttc39b
Ngb	0.05913	0.292099	0.232969	Ngb
Bcap29	0.501601	0.734433	0.232832	Bcap29
Klhdc2	0.416052	0.648847	0.232795	Klhdc2
Ssr2	0.61232	0.845065	0.232745	Ssr2
Ap1s2	0.207948	0.440318	0.23237	Ap1s2
Uxs1	0.35103	0.583385	0.232354	Uxs1
Mdfic	0.0240064	0.256352	0.232345	Mdfic
Acvr1b	0.323938	0.556018	0.23208	Acvr1b
Sec13	0.267342	0.499281	0.23194	Sec13
Fars2	0.329987	0.561917	0.23193	Fars2
Pxmp2	0.394475	0.626228	0.231753	Pxmp2
Pcgf1	0.158999	0.390635	0.231636	Pcgf1
Klkb1	0.299729	0.531171	0.231442	Klkb1
Akip1	0.68957	0.920672	0.231102	Akip1
Suv39h1	0.0252717	0.256352	0.23108	Suv39h1
Vopp1	0.081987	0.312976	0.230989	Vopp1
Nudt3	0.180747	0.411351	0.230604	Nudt3
Arl8a	0.382151	0.6127	0.230549	Arl8a
2410089E03Rik	0.584337	0.814767	0.23043	2410089E03Rik
Mrps17	0.816786	1.04702	0.230233	Mrps17
Nfe2l1	0.390483	0.620697	0.230215	Nfe2l1
Ttyh1	0.925075	1.15518	0.230109	Ttyh1
Rgcc	0.780976	1.01092	0.229947	Rgcc
Ganc	0.326312	0.556018	0.229706	Ganc
Rad54l2	0.0788827	0.30852	0.229638	Rad54l2
Pld3	0.532826	0.762435	0.229608	Pld3
Actn1	0.514049	0.743631	0.229582	Actn1
Lrrc1	0.353957	0.583385	0.229427	Lrrc1
Bcar1	0.286756	0.516162	0.229406	Bcar1
Dusp6	0.0954304	0.324676	0.229246	Dusp6
6330418K02Rik	0.260485	0.489465	0.22898	6330418K02Rik
Mak16	0.0797326	0.30852	0.228788	Mak16
Sdhaf1	0.212033	0.440318	0.228285	Sdhaf1
Dchs1	0.573395	0.801457	0.228062	Dchs1
Tspan14	0.0718913	0.299755	0.227864	Tspan14
Tctn3	0.369644	0.597272	0.227628	Tctn3
Mtrf1l	0.0644718	0.292099	0.227627	Mtrf1l
Cul1	0.45906	0.686651	0.227591	Cul1
Arid2	0.177973	0.405527	0.227553	Arid2
Btg1	0.288725	0.516162	0.227437	Btg1
Cdk9	0.152424	0.379686	0.227261	Cdk9
Dock1	0.329728	0.55675	0.227022	Dock1
Caly	0.290977	0.517884	0.226907	Caly
Tcf7l2	0.192631	0.419377	0.226746	Tcf7l2
Rnf103	0.188629	0.415372	0.226743	Rnf103
Mrps34	0.286003	0.51265	0.226647	Mrps34
Aldh7a1	0.298457	0.525102	0.226645	Aldh7a1
Slc25a10	0.0700656	0.296629	0.226563	Slc25a10
Rad51d	0.0656386	0.292099	0.226461	Rad51d
Tmem184c	0.17911	0.405527	0.226416	Tmem184c
Med25	0.721873	0.947859	0.225986	Med25
Wdr83	0.0308956	0.256352	0.225456	Wdr83
Cc2d2a	0.493648	0.718823	0.225175	Cc2d2a
Smyd4	0.18068	0.405527	0.224846	Smyd4
Nat6	0.229747	0.454493	0.224745	Nat6
Ash2l	0.241999	0.466515	0.224516	Ash2l
Synpr	0.400077	0.624534	0.224457	Synpr
Ubr5	0.49453	0.718823	0.224293	Ubr5
Fam107a	0.129878	0.354038	0.22416	Fam107a
Btd	0.292042	0.516162	0.22412	Btd
Pdlim1	0.194077	0.418148	0.224071	Pdlim1
Ado	0.332082	0.556018	0.223936	Ado
Acer3	0.160147	0.383836	0.223688	Acer3
Cav2	0.698136	0.921812	0.223676	Cav2
Idh2	1.18574	1.40908	0.223333	Idh2
Erh	0.90668	1.12989	0.223211	Erh
Eif4e2	0.192516	0.415372	0.222855	Eif4e2
Hnrnpab	0.446036	0.668805	0.222769	Hnrnpab
Cox6a1	1.86133	2.08391	0.222579	Cox6a1
Plaa	0.0462459	0.268729	0.222483	Plaa
Cnnm2	0.0292823	0.251636	0.222353	Cnnm2
Gnl3l	0.203597	0.425939	0.222342	Gnl3l
Fgd1	0.0341554	0.256352	0.222196	Fgd1
Tnik	0.0341554	0.256352	0.222196	Tnik
Rps6kb2	0.0341554	0.256352	0.222196	Rps6kb2
Bcl10	0.168472	0.390635	0.222163	Bcl10
Sorl1	1.03967	1.26181	0.222144	Sorl1
Ap3d1	0.102545	0.324676	0.222132	Ap3d1
Wdr20	0.29411	0.516162	0.222052	Wdr20
Gemin8	0.102633	0.324676	0.222043	Gemin8
Rpl31	1.90232	2.12428	0.221954	Rpl31
Ambra1	0.0345617	0.256352	0.22179	Ambra1
Sh3bgrl	0.402792	0.624534	0.221742	Sh3bgrl
Ranbp2	0.394249	0.615878	0.221629	Ranbp2
Ppp1r10	0.438794	0.660369	0.221575	Ppp1r10
Cd302	0.103302	0.324676	0.221375	Cd302
Coq2	0.15429	0.375518	0.221228	Coq2
Terf2ip	0.162664	0.383836	0.221172	Terf2ip
Tctn1	0.0477847	0.268729	0.220944	Tctn1
Zbtb26	0.0354788	0.256352	0.220873	Zbtb26
Ythdc2	0.0308956	0.251636	0.22074	Ythdc2
Nckap1	0.668354	0.888911	0.220557	Nckap1
Mzf1	0.295607	0.516162	0.220555	Mzf1
Gm11273	0.159286	0.379686	0.2204	Gm11273
Ttc21a	1.19286	1.41295	0.220092	Ttc21a
Cry2	0.89765	1.11773	0.220076	Cry2
Irf2bpl	0.585764	0.805596	0.219832	Irf2bpl
Gtf2b	0.383453	0.60292	0.219467	Gtf2b
Chid1	0.396558	0.615878	0.219321	Chid1
Usp5	0.160391	0.379686	0.219294	Usp5
Pop7	0.156501	0.375518	0.219017	Pop7
Rhot1	0.0896466	0.30852	0.218874	Rhot1
Ptgfrn	0.225436	0.444224	0.218788	Ptgfrn
Gadd45g	0.165096	0.383836	0.21874	Gadd45g
Ola1	0.211248	0.429902	0.218654	Ola1
Ak4	0.135469	0.354039	0.218569	Ak4
Mroh1	0.0780724	0.296629	0.218556	Mroh1
Chp1	0.337616	0.556018	0.218403	Chp1
2310039H08Rik	0.500439	0.718835	0.218396	2310039H08Rik
Rab11fip1	0.0737398	0.292099	0.218359	Rab11fip1
Setd4	0.337783	0.556018	0.218236	Setd4
Spata7	0.604262	0.82246	0.218198	Spata7
Ccar2	0.161615	0.379686	0.21807	Ccar2
Pus7	0.41542	0.633224	0.217805	Pus7
Scaf8	0.275499	0.493184	0.217685	Scaf8
Rpl4	1.84726	2.06419	0.21693	Rpl4
Lsm2	0.317788	0.534576	0.216788	Lsm2
Tcaf1	0.37586	0.592438	0.216578	Tcaf1
Dph7	0.10823	0.324676	0.216446	Dph7
Dhps	0.0804686	0.296629	0.21616	Dhps
Psenen	1.39869	1.61459	0.2159	Psenen
Nol11	0.0971978	0.312976	0.215778	Nol11
Poldip3	0.49261	0.707959	0.215348	Poldip3
Psma3	1.40416	1.61942	0.215263	Psma3
Gclm	0.672612	0.887818	0.215206	Gclm
Rnf4	0.160511	0.375518	0.215007	Rnf4
Trub1	0.0538336	0.268729	0.214895	Trub1
4933404O12Rik	0.0542291	0.268729	0.2145	4933404O12Rik
Setd2	0.165272	0.379686	0.214414	Setd2
Prnp	1.9137	2.1281	0.214396	Prnp
Slc4a8	0.412921	0.627225	0.214304	Slc4a8
Endog	0.913625	1.12751	0.213887	Endog
Cltc	0.596601	0.809969	0.213368	Cltc
Llgl1	0.167123	0.379686	0.212563	Llgl1
Ofd1	0.080048	0.292099	0.212051	Ofd1
Ruvbl1	0.769473	0.981493	0.212019	Ruvbl1
Pdcl3	0.426035	0.637865	0.21183	Pdcl3
Ss18	0.294915	0.506634	0.211719	Ss18
Copg1	0.208303	0.419377	0.211074	Copg1
Snrk	0.500405	0.711475	0.21107	Snrk
Mir670hg	0.0856251	0.296629	0.211003	Mir670hg
Ilvbl	0.345222	0.556018	0.210796	Ilvbl
Trp53i11	0.0579805	0.268729	0.210749	Trp53i11
Ndufs7	1.29655	1.50726	0.210712	Ndufs7
M6pr	0.880178	1.09083	0.21065	M6pr
Rcan1	0.0863227	0.296629	0.210306	Rcan1
Anp32a	1.26073	1.47096	0.21023	Anp32a
Vamp3	0.132459	0.342679	0.21022	Vamp3
Rsu1	0.497817	0.707958	0.210142	Rsu1
Fkbp8	0.905359	1.11545	0.210092	Fkbp8
Ccdc107	0.832127	1.04217	0.210046	Ccdc107
Vipas39	0.0867128	0.296629	0.209916	Vipas39
Nars2	0.086754	0.296629	0.209875	Nars2
Hnrnpm	0.726886	0.936429	0.209543	Hnrnpm
Psat1	0.652993	0.862501	0.209508	Psat1
BC034090	0	0.209465	0.209465	BC034090
Optn	0	0.209465	0.209465	Optn
Bend5	0	0.209465	0.209465	Bend5
Mfsd2a	0	0.209465	0.209465	Mfsd2a
Tpd52l1	0	0.209465	0.209465	Tpd52l1
Iars	0	0.209465	0.209465	Iars
Anxa11	1.03185	1.24117	0.209319	Anxa11
Tmem138	0.802449	1.01153	0.209078	Tmem138
Tcf7l1	0.0920821	0.301137	0.209055	Tcf7l1
Dopey1	0.103998	0.312976	0.208978	Dopey1
Ube2e2	0.633954	0.842912	0.208958	Ube2e2
Klf15	0.25136	0.460215	0.208855	Klf15
Msn	0.783125	0.991949	0.208824	Msn
Fopnl	0.307529	0.516162	0.208633	Fopnl
Zfp944	0.182062	0.390635	0.208572	Zfp944
Prcc	0.0477847	0.256352	0.208567	Prcc
Borcs8	0.104448	0.312976	0.208528	Borcs8
Ammecr1l	0.129828	0.338354	0.208526	Ammecr1l
Hnrnpu	0.939944	1.14824	0.208296	Hnrnpu
Smarcd1	0.468629	0.676912	0.208283	Smarcd1
Orc6	0.207209	0.415372	0.208162	Orc6
Crip2	2.40068	2.60867	0.207995	Crip2
Rp2	0.404839	0.612589	0.20775	Rp2
Mapre3	0.304958	0.51265	0.207692	Mapre3
Htatsf1	0.416942	0.624534	0.207592	Htatsf1
Ankhd1	0.308584	0.516162	0.207578	Ankhd1
Aqp4	1.82551	2.03299	0.207483	Aqp4
Ncbp2	0.593996	0.801457	0.207461	Ncbp2
Caml	0.53697	0.744375	0.207405	Caml
Lrrc46	1.0591	1.26638	0.207276	Lrrc46
Pex11b	0.408633	0.615878	0.207246	Pex11b
[truncated: 11,039 more rows]

## Sheet: Microglia
gene_id	Control	Treated	diff	gene
Cd74	0.318991	2.22399	1.905	Cd74
Vtn	0.06027	1.75296	1.69269	Vtn
Rgs5	0.113692	1.39546	1.28177	Rgs5
H2-Ab1	0.0768909	1.01682	0.939927	H2-Ab1
Igfbp7	0.0498043	0.844928	0.795123	Igfbp7
Higd1b	0	0.757789	0.757789	Higd1b
Ndufa4l2	0	0.69927	0.69927	Ndufa4l2
Syt1	0.0150047	0.658527	0.643522	Syt1
Adgrg1	0.930746	1.50096	0.57021	Adgrg1
Smim19	0.0533798	0.603684	0.550304	Smim19
Ptn	0.845649	1.3822	0.536554	Ptn
Fance	0.113263	0.643412	0.530149	Fance
Pcp4	0.0480286	0.575721	0.527693	Pcp4
B430010I23Rik	0.624132	1.15032	0.526189	B430010I23Rik
Calm3	0.763638	1.28946	0.525819	Calm3
Nap1l1	0.226412	0.743855	0.517443	Nap1l1
Ltb	0.158194	0.661618	0.503424	Ltb
Emc10	0.733903	1.23189	0.497989	Emc10
Cd48	0.634212	1.1266	0.492384	Cd48
Med30	0.323392	0.812593	0.4892	Med30
Aplp2	0.157254	0.644612	0.487358	Aplp2
Rps27	0.685276	1.17181	0.486533	Rps27
F8a	0.0193256	0.503755	0.484429	F8a
Rps27rt	2.08734	2.56815	0.480814	Rps27rt
Rpl13a	2.16766	2.64844	0.48078	Rpl13a
Atp1b1	0.269603	0.746709	0.477106	Atp1b1
Iffo1	0.462645	0.936755	0.474111	Iffo1
Plod1	0.333352	0.806592	0.47324	Plod1
Dgcr6	0.092516	0.564546	0.47203	Dgcr6
Ppp1r37	0.0483243	0.518304	0.469979	Ppp1r37
Dok3	0.23776	0.706106	0.468346	Dok3
Ptpn18	1.50934	1.97579	0.466456	Ptpn18
Ebf1	0.0237643	0.489262	0.465497	Ebf1
Ighm	1.62589	2.08806	0.462169	Ighm
Scn1b	0.381874	0.8436	0.461727	Scn1b
Borcs6	0.245061	0.704635	0.459573	Borcs6
Chtf8	0.286088	0.744629	0.458541	Chtf8
Cirbp	0.857499	1.31207	0.454572	Cirbp
Ccr5	1.2106	1.66164	0.451042	Ccr5
Nrp1	0.318113	0.765639	0.447526	Nrp1
Nifk	0.271832	0.712086	0.440255	Nifk
Snrpb	0.956686	1.39498	0.43829	Snrpb
Map2k2	0.821754	1.2591	0.437348	Map2k2
Gem	0.297905	0.732551	0.434646	Gem
Pelp1	0.0212144	0.45501	0.433796	Pelp1
Itgb5	1.37746	1.81087	0.43341	Itgb5
Gm10031	0.0298708	0.461718	0.431847	Gm10031
Myl9	0	0.431829	0.431829	Myl9
Adk	0.0487062	0.479771	0.431065	Adk
Nsf	0.207309	0.637558	0.43025	Nsf
Clstn1	0.265074	0.692509	0.427435	Clstn1
Gid8	0.18856	0.6154	0.42684	Gid8
Alas1	0.300529	0.726147	0.425618	Alas1
Mgrn1	0.38053	0.805833	0.425302	Mgrn1
Cxcl14	0.235133	0.654789	0.419656	Cxcl14
Prdx6	0.584901	1.00372	0.418822	Prdx6
Tsnax	0.304803	0.723289	0.418486	Tsnax
Stmn4	0.0350074	0.453428	0.418421	Stmn4
Fcgrt	0.65004	1.06746	0.417415	Fcgrt
Klhdc8b	0.405453	0.822233	0.41678	Klhdc8b
B4galt3	0.214427	0.628336	0.413909	B4galt3
Parvg	0.557874	0.969921	0.412047	Parvg
Wdr89	1.15227	1.56326	0.410991	Wdr89
Vps9d1	0.219447	0.628499	0.409051	Vps9d1
Chn1	0.0339678	0.441807	0.407839	Chn1
H2-DMb1	0.888893	1.29505	0.406158	H2-DMb1
Rpsa	1.77228	2.17781	0.405524	Rpsa
Fam219b	0.0202783	0.425463	0.405185	Fam219b
D8Ertd738e	1.03824	1.44322	0.404986	D8Ertd738e
Gm10073	0.643586	1.04781	0.404228	Gm10073
Dctpp1	0.457232	0.858677	0.401445	Dctpp1
Hectd1	0.421127	0.822371	0.401244	Hectd1
Gadd45g	0.446597	0.84777	0.401173	Gadd45g
Fnta	0.414539	0.814433	0.399894	Fnta
mt-Nd3	1.28026	1.67997	0.399717	mt-Nd3
Mpdu1	0.326477	0.724401	0.397924	Mpdu1
Coro1c	0.255427	0.652393	0.396966	Coro1c
Mon2	0.0569935	0.453373	0.39638	Mon2
Ngdn	0.262177	0.657631	0.395455	Ngdn
Ppp3r1	0.427417	0.821902	0.394485	Ppp3r1
Prdx4	0.542957	0.937201	0.394244	Prdx4
Lyz2	1.46467	1.85757	0.392896	Lyz2
Ttc9	0.122235	0.513624	0.391388	Ttc9
Syt11	0.206212	0.596832	0.39062	Syt11
Tbpl1	0.252413	0.642087	0.389673	Tbpl1
Chst1	0.293692	0.683315	0.389623	Chst1
Dusp7	0.258469	0.647207	0.388738	Dusp7
Rpl13a-ps1	1.56835	1.95691	0.388561	Rpl13a-ps1
Ptprs	0.163052	0.550008	0.386956	Ptprs
Glrx3	0.488082	0.873508	0.385426	Glrx3
Gria2	0.0157436	0.400974	0.38523	Gria2
Arl10	0.288394	0.671547	0.383153	Arl10
Tmsb10	1.64457	2.02765	0.383077	Tmsb10
Tm2d1	0.351196	0.733684	0.382488	Tm2d1
Tmed4	0.386336	0.76768	0.381344	Tmed4
Lasp1	0.361567	0.741285	0.379718	Lasp1
Sirpa	2.0004	2.37997	0.379575	Sirpa
Chmp1a	0.255863	0.63366	0.377797	Chmp1a
S100a16	0.232303	0.610039	0.377737	S100a16
Gpm6a	0.435417	0.81271	0.377293	Gpm6a
Cd79b	0.496672	0.872822	0.37615	Cd79b
Etv5	0.404776	0.779041	0.374265	Etv5
Bcl2	0.0566776	0.430784	0.374107	Bcl2
Tmem44	0.123589	0.496922	0.373333	Tmem44
Tmx1	0.257095	0.629388	0.372294	Tmx1
Nabp2	0.173081	0.544288	0.371207	Nabp2
Mapre2	0.237988	0.609026	0.371039	Mapre2
Zfp36l2	0.911295	1.28081	0.369519	Zfp36l2
Ly6e	2.19807	2.56738	0.369311	Ly6e
Ndufv2	0.700269	1.06941	0.36914	Ndufv2
Srsf7	0.570026	0.938277	0.368251	Srsf7
Akt1s1	0.183823	0.548774	0.364951	Akt1s1
Nemp1	0	0.364204	0.364204	Nemp1
Ggt5	0.217172	0.579666	0.362494	Ggt5
Timm8b	0.640848	1.00296	0.362108	Timm8b
Aplp1	0.112526	0.472032	0.359506	Aplp1
Timm17b	0.325352	0.683397	0.358044	Timm17b
Mgst3	0.237021	0.595065	0.358044	Mgst3
Lrrfip2	0.116675	0.474684	0.358009	Lrrfip2
Ttc13	0.248387	0.605778	0.357391	Ttc13
Ndufaf7	0.330239	0.687417	0.357177	Ndufaf7
Fyn	0.0343547	0.390748	0.356394	Fyn
Plekhj1	0.591275	0.94452	0.353245	Plekhj1
Srsf2	1.06078	1.41197	0.35119	Srsf2
Ssbp4	0.693736	1.04439	0.35065	Ssbp4
Rabgap1	0.159486	0.509568	0.350083	Rabgap1
Arid1a	0.533978	0.883123	0.349145	Arid1a
Ppil3	0.10974	0.458464	0.348724	Ppil3
Pum2	0.496833	0.845452	0.348619	Pum2
Arl2bp	0.165011	0.513407	0.348396	Arl2bp
Nsmce4a	0.429883	0.776909	0.347026	Nsmce4a
0610009B22Rik	0.371735	0.718475	0.34674	0610009B22Rik
Ncdn	0.0846693	0.430983	0.346314	Ncdn
Ogfrl1	0.750899	1.09719	0.346292	Ogfrl1
Nrgn	0	0.34574	0.34574	Nrgn
Fxyd6	0	0.34574	0.34574	Fxyd6
Diras2	0	0.34574	0.34574	Diras2
Lrrn3	0	0.34574	0.34574	Lrrn3
Cadm2	0	0.34574	0.34574	Cadm2
Jpt1	0.830214	1.17536	0.345149	Jpt1
Prnp	0.426068	0.770013	0.343945	Prnp
Stmn3	0.0297876	0.372525	0.342737	Stmn3
Prag1	0.17086	0.513557	0.342696	Prag1
Hacd2	0.241042	0.58317	0.342128	Hacd2
Rela	0.254029	0.596155	0.342126	Rela
Tmem86a	1.26949	1.61159	0.342095	Tmem86a
Acaa2	0.0532045	0.393784	0.34058	Acaa2
Larp4b	0.214432	0.554398	0.339966	Larp4b
Stat6	0.23676	0.576595	0.339835	Stat6
Uvrag	0.270696	0.61051	0.339814	Uvrag
Csnk2a2	0.0561527	0.395016	0.338863	Csnk2a2
Tmem176b	1.60681	1.94511	0.338306	Tmem176b
Sdk2	0	0.337578	0.337578	Sdk2
Cnr1	0	0.337578	0.337578	Cnr1
Igf1r	0.191778	0.529263	0.337485	Igf1r
Papd4	0.202346	0.539723	0.337377	Papd4
Tsc22d3	0.301547	0.638751	0.337203	Tsc22d3
Snap25	0.365966	0.702829	0.336862	Snap25
Rpl10a	2.24393	2.57963	0.3357	Rpl10a
Cox11	0.138984	0.47362	0.334635	Cox11
Pi4k2a	0.0224363	0.356873	0.334437	Pi4k2a
Cd180	0.814649	1.14834	0.333695	Cd180
Lmbr1l	0.0244915	0.358152	0.333661	Lmbr1l
Rnaset2a	1.26061	1.59404	0.333427	Rnaset2a
Nrm	0.339421	0.672521	0.3331	Nrm
Khk	0.690199	1.02165	0.33145	Khk
Snhg20	0.191704	0.522943	0.331239	Snhg20
Actr1b	0.195002	0.526222	0.33122	Actr1b
Cald1	0.0784809	0.409551	0.33107	Cald1
Sun2	0.331508	0.662409	0.330901	Sun2
Dhrs3	0.831253	1.16211	0.330857	Dhrs3
Sub1	1.44455	1.77529	0.33074	Sub1
Rnpepl1	0.158935	0.489662	0.330727	Rnpepl1
Tmem106b	0.16339	0.494082	0.330692	Tmem106b
Rab10os	0.246082	0.575922	0.32984	Rab10os
Lypla1	0.242981	0.572409	0.329428	Lypla1
Cmtm3	0.719844	1.04862	0.328777	Cmtm3
Anp32e	0.378636	0.707199	0.328563	Anp32e
Akt2	0.0688654	0.396001	0.327136	Akt2
Bcs1l	0.0275872	0.354656	0.327069	Bcs1l
C1d	0.598695	0.925588	0.326893	C1d
Tgfbr2	0.660085	0.985758	0.325673	Tgfbr2
Pa2g4	0.350935	0.676519	0.325584	Pa2g4
S100a11	0.122665	0.447644	0.324979	S100a11
Slc17a7	0.0237642	0.348247	0.324483	Slc17a7
Atp6v1b2	0.328682	0.652389	0.323707	Atp6v1b2
Sept4	0	0.323404	0.323404	Sept4
Mbp	2.4846	2.80776	0.323164	Mbp
Tial1	0.231435	0.554212	0.322777	Tial1
Vamp7	0.148609	0.471296	0.322687	Vamp7
2610044O15Rik8	0.0465696	0.369251	0.322681	2610044O15Rik8
Mmadhc	0.152924	0.475497	0.322573	Mmadhc
Ptgds	0.239809	0.561097	0.321288	Ptgds
Zfp446	0.0244915	0.34574	0.321249	Zfp446
Pfdn6	0.358557	0.679146	0.320589	Pfdn6
Selenof	1.70048	2.02031	0.319833	Selenof
Ube2q1	0.133596	0.452647	0.31905	Ube2q1
Gtf2i	0.334664	0.653699	0.319035	Gtf2i
Tmem245	0.172055	0.489845	0.31779	Tmem245
Pgm2l1	0.062715	0.380171	0.317456	Pgm2l1
Krcc1	0.918499	1.23529	0.316794	Krcc1
Nmi	0.27931	0.595675	0.316365	Nmi
Pithd1	0.183196	0.499127	0.315931	Pithd1
Fbxw5	0.247613	0.563255	0.315642	Fbxw5
Gltp	0.634734	0.950251	0.315517	Gltp
Camk2a	0.073797	0.389121	0.315324	Camk2a
Cers2	0.606469	0.921293	0.314824	Cers2
Fam171b	0.0312565	0.34574	0.314484	Fam171b
Atpif1	1.55098	1.86487	0.313887	Atpif1
Tmed7	0.578516	0.892202	0.313686	Tmed7
Mfsd11	0.325308	0.638228	0.31292	Mfsd11
Lyn	1.29834	1.61107	0.312732	Lyn
Crip1	0.314319	0.625488	0.311169	Crip1
Vps36	0.292848	0.603468	0.310619	Vps36
Acads	0.637853	0.948158	0.310305	Acads
1110008F13Rik	0.746588	1.05643	0.309844	1110008F13Rik
Tomm34	0.288262	0.597483	0.309221	Tomm34
N4bp2l1	0.300971	0.610017	0.309046	N4bp2l1
Fam3c	0.290988	0.599821	0.308832	Fam3c
Pla2g15	1.1212	1.42992	0.308716	Pla2g15
Ykt6	0.315428	0.623457	0.308028	Ykt6
Atp5d	1.06589	1.37382	0.307935	Atp5d
Gabarapl2	1.20241	1.50998	0.307567	Gabarapl2
Sac3d1	0.105459	0.412753	0.307294	Sac3d1
Ube2f	0.316151	0.622689	0.306539	Ube2f
Ss18	0.449122	0.754511	0.305389	Ss18
Cic	0.145082	0.450149	0.305067	Cic
Tpt1	2.37442	2.67902	0.304604	Tpt1
Eef1d	1.25618	1.56057	0.304389	Eef1d
Eef2	1.92608	2.2299	0.30382	Eef2
1700017B05Rik	0.613271	0.916977	0.303707	1700017B05Rik
Slc15a4	0.166238	0.46985	0.303612	Slc15a4
Brd7	0.283789	0.58732	0.303532	Brd7
Pex6	0.175513	0.478685	0.303173	Pex6
Nenf	0.742654	1.0456	0.302948	Nenf
Nmt1	0.507706	0.810281	0.302574	Nmt1
Cdh11	0.060374	0.36256	0.302186	Cdh11
Pdhb	0.215568	0.517665	0.302097	Pdhb
Mfsd13a	0.12517	0.42707	0.3019	Mfsd13a
Lgi4	0	0.301771	0.301771	Lgi4
Gpr183	0.701529	1.00289	0.301356	Gpr183
Anapc7	0.111359	0.411955	0.300597	Anapc7
Selenoh	0.21969	0.519996	0.300306	Selenoh
Kansl1	0.218619	0.518587	0.299968	Kansl1
Apoe	2.76018	3.06005	0.299869	Apoe
Ip6k1	0.194132	0.493896	0.299764	Ip6k1
Eef1b2	1.41113	1.71077	0.299642	Eef1b2
Ccl12	0.540413	0.839975	0.299563	Ccl12
Pcnp	0.560285	0.85842	0.298136	Pcnp
Rgl2	0.46097	0.759086	0.298116	Rgl2
Tbc1d10a	0.185481	0.483547	0.298065	Tbc1d10a
Fech	0.137269	0.435108	0.297839	Fech
Vps25	0	0.29758	0.29758	Vps25
Rilpl1	0.411117	0.707412	0.296295	Rilpl1
Cd300c2	1.64371	1.93945	0.295742	Cd300c2
Wdr74	0.0150047	0.310682	0.295677	Wdr74
Vstm4	0.0237642	0.319325	0.295561	Vstm4
Pno1	0.0884176	0.383571	0.295154	Pno1
Uap1l1	0.36609	0.660405	0.294315	Uap1l1
Plxdc2	1.5101	1.80411	0.294005	Plxdc2
Fbxw7	0.0833768	0.376676	0.293299	Fbxw7
Psmb4	0.534039	0.826922	0.292883	Psmb4
Sfr1	0.659757	0.952547	0.292789	Sfr1
Lrrc25	0.932705	1.22514	0.292432	Lrrc25
Ptov1	0.633312	0.925651	0.292339	Ptov1
Plxnb1	0	0.290748	0.290748	Plxnb1
Pth1r	0	0.290748	0.290748	Pth1r
Gng11	0	0.290748	0.290748	Gng11
Gtf2e2	0.069387	0.360047	0.29066	Gtf2e2
Akirin2	0.405725	0.695932	0.290207	Akirin2
Plekhb1	0.284617	0.574633	0.290016	Plekhb1
Elovl1	0.512481	0.802464	0.289984	Elovl1
Fam193b	0.0978529	0.387834	0.289981	Fam193b
Strbp	0.0922983	0.382165	0.289866	Strbp
Ctsc	1.55552	1.84533	0.289807	Ctsc
Zmym6	0	0.28927	0.28927	Zmym6
Gmeb2	0	0.288933	0.288933	Gmeb2
Ttc14	0.570231	0.858747	0.288516	Ttc14
Creb3	0.568926	0.856628	0.287701	Creb3
Tgfb1	1.71008	1.99776	0.287683	Tgfb1
Ranbp2	0.0880901	0.375762	0.287671	Ranbp2
Ppp1ca	1.36155	1.64905	0.287495	Ppp1ca
Tmem243	0.71588	1.00325	0.287369	Tmem243
Gsdmd	0.56691	0.853872	0.286962	Gsdmd
Atp6v1e1	0.755173	1.04203	0.286859	Atp6v1e1
Unc13c	0	0.286792	0.286792	Unc13c
Pea15a	0.932578	1.21909	0.286509	Pea15a
Pigyl	0.32452	0.610396	0.285877	Pigyl
Nt5c	0.194738	0.480466	0.285728	Nt5c
Tmem50b	0.257836	0.54343	0.285594	Tmem50b
Rack1	1.41841	1.70381	0.285398	Rack1
Vgll4	0.77705	1.06177	0.284723	Vgll4
Camkk2	0.260536	0.545119	0.284583	Camkk2
Ecsit	0.0705705	0.35505	0.28448	Ecsit
Zfp653	0	0.284231	0.284231	Zfp653
Pcnx4	0	0.283821	0.283821	Pcnx4
Pigk	0.434389	0.717283	0.282894	Pigk
Il13ra1	0.314241	0.597094	0.282852	Il13ra1
Msl2	0.302792	0.585503	0.282711	Msl2
BC005624	0.652901	0.934502	0.281602	BC005624
Acsl1	0.278966	0.560553	0.281587	Acsl1
Rps2	2.35727	2.63865	0.281372	Rps2
Napb	0.0646878	0.34574	0.281052	Napb
Agpat3	0.186424	0.467466	0.281042	Agpat3
Tlr4	0.25751	0.53838	0.28087	Tlr4
Sap18b	0.217543	0.498247	0.280704	Sap18b
Tagln3	0.0444557	0.325095	0.280639	Tagln3
Rabac1	1.46541	1.74538	0.279978	Rabac1
Mbd6	0.14583	0.425779	0.279949	Mbd6
Mrps24	0.544845	0.824681	0.279836	Mrps24
Cat	0.259654	0.539389	0.279735	Cat
Cap2	0	0.279062	0.279062	Cap2
Mobp	1.06618	1.34516	0.278979	Mobp
Slc9a9	0.499874	0.778803	0.27893	Slc9a9
Tep1	0.208607	0.487476	0.278869	Tep1
Rnf166	0.229811	0.507764	0.277953	Rnf166
Imp3	0.338755	0.616699	0.277943	Imp3
Psmg3	0.287148	0.564899	0.27775	Psmg3
5031425E22Rik	0.134174	0.411864	0.277691	5031425E22Rik
Iars	0.148646	0.426228	0.277581	Iars
Srek1ip1	0.370669	0.647881	0.277211	Srek1ip1
Vpreb3	0	0.276791	0.276791	Vpreb3
Pou2f2	1.06176	1.33848	0.276723	Pou2f2
Gpc5	0	0.276399	0.276399	Gpc5
Calhm2	0.317511	0.593876	0.276366	Calhm2
Rps24	2.9599	3.23574	0.275847	Rps24
Ppp1r16b	0	0.275545	0.275545	Ppp1r16b
Orai3	0.263871	0.539382	0.275511	Orai3
Sipa1l2	0.202951	0.477791	0.27484	Sipa1l2
Supt7l	0.0810334	0.355767	0.274733	Supt7l
Ppp1r14a	0.0693495	0.34368	0.27433	Ppp1r14a
Smim8	0.28373	0.557251	0.27352	Smim8
Zfp787	0.354048	0.627314	0.273266	Zfp787
Tmem128	0.401222	0.674302	0.273081	Tmem128
Zfp467	0.388179	0.660948	0.272769	Zfp467
Cep70	0.0565314	0.328949	0.272418	Cep70
Ebp	0.481706	0.753844	0.272139	Ebp
Rtn1	0.622362	0.894414	0.272052	Rtn1
Txnip	1.12058	1.39248	0.2719	Txnip
Eif1ad	0.254397	0.526003	0.271606	Eif1ad
Zfp560	0.0745319	0.346079	0.271547	Zfp560
Gm37494	0.171224	0.442662	0.271438	Gm37494
Il10ra	0.661471	0.932805	0.271334	Il10ra
Ttc39b	0.105834	0.377046	0.271212	Ttc39b
Wdr37	0.110729	0.381766	0.271037	Wdr37
Pon2	0.806757	1.07767	0.27091	Pon2
Dmtn	0.038142	0.308976	0.270834	Dmtn
Usp25	0.189668	0.460119	0.270451	Usp25
1810058I24Rik	0.580435	0.850774	0.270339	1810058I24Rik
Rbck1	0.364096	0.634364	0.270269	Rbck1
Nelfcd	0.0770082	0.346796	0.269788	Nelfcd
Mrpl33	0.508279	0.777761	0.269482	Mrpl33
Hmgxb3	0	0.268368	0.268368	Hmgxb3
Btf3l4	0.113777	0.381503	0.267726	Btf3l4
Bcl7b	0.292713	0.560045	0.267332	Bcl7b
Mtus1	0.63707	0.904187	0.267117	Mtus1
Snrpn	0.212939	0.479998	0.267059	Snrpn
Akap12	0.0237594	0.290748	0.266989	Akap12
Srsf3	0.946988	1.21385	0.266861	Srsf3
Gm11808	1.75627	2.02295	0.26668	Gm11808
Gnb5	0.168108	0.434775	0.266666	Gnb5
Ythdf2	0.364052	0.630675	0.266623	Ythdf2
Ech1	0.719442	0.98538	0.265938	Ech1
Rpl10	1.26707	1.53299	0.265926	Rpl10
Phlda1	0.162264	0.428078	0.265814	Phlda1
Cers5	0.158635	0.423924	0.265289	Cers5
Lpar6	0.970395	1.23548	0.265086	Lpar6
P2rx4	0.346498	0.611308	0.26481	P2rx4
Dhps	0.134972	0.399674	0.264702	Dhps
Gpr108	0.316972	0.581553	0.26458	Gpr108
Tsen34	0.487711	0.752232	0.264521	Tsen34
Slc25a51	0.0148494	0.279154	0.264305	Slc25a51
Mapk1	0.325045	0.588932	0.263886	Mapk1
Stx4a	0.547018	0.810784	0.263766	Stx4a
Myg1	0.069186	0.332646	0.26346	Myg1
Rgmb	0.433764	0.69706	0.263297	Rgmb
Map3k10	0	0.263061	0.263061	Map3k10
Tbcc	0.2908	0.553719	0.262918	Tbcc
Meaf6	0.178343	0.44123	0.262887	Meaf6
Myadm	0.143986	0.406861	0.262875	Myadm
Ecscr	1.68935	1.95222	0.262869	Ecscr
Wdr77	0.116074	0.378924	0.262851	Wdr77
Triap1	0.374083	0.636805	0.262722	Triap1
Crlf3	0.5417	0.804306	0.262606	Crlf3
Rplp2	2.76827	3.03084	0.26257	Rplp2
B4galt6	0.180433	0.442664	0.262231	B4galt6
Bag4	0.0150047	0.276874	0.26187	Bag4
Il21r	0.888233	1.14969	0.261454	Il21r
Ubr3	0.0762153	0.337323	0.261108	Ubr3
Fam199x	0.0388801	0.299868	0.260988	Fam199x
Coro7	0.0333137	0.294297	0.260983	Coro7
Tmem123	0.156767	0.417308	0.260542	Tmem123
Smagp	0.277905	0.538288	0.260383	Smagp
St3gal4	0	0.259972	0.259972	St3gal4
Ncf1	1.01631	1.27614	0.259836	Ncf1
Vps37b	0.461301	0.721024	0.259723	Vps37b
Rasgrf1	0	0.259649	0.259649	Rasgrf1
2210016F16Rik	0.284396	0.544022	0.259627	2210016F16Rik
Nfs1	0.146898	0.4063	0.259402	Nfs1
Bcar3	0	0.259279	0.259279	Bcar3
Ubl3	0.637996	0.897176	0.25918	Ubl3
Npc1	0.45224	0.711359	0.259118	Npc1
Klhl24	0.492478	0.751578	0.2591	Klhl24
Snrpd2	0.742835	1.00186	0.259028	Snrpd2
Notch2	0.297149	0.555918	0.25877	Notch2
Ppp2r5c	0.357064	0.615768	0.258704	Ppp2r5c
Dync1i2	0.563379	0.821954	0.258575	Dync1i2
Yy1	0.264779	0.523092	0.258313	Yy1
Fam192a	0.317888	0.575876	0.257987	Fam192a
Hyal1	0.0759292	0.333701	0.257772	Hyal1
Arhgef2	0.450868	0.708138	0.25727	Arhgef2
Gm9844	0.254512	0.511151	0.256639	Gm9844
Gm4924	0	0.256491	0.256491	Gm4924
Jph4	0	0.256397	0.256397	Jph4
Atg101	0.220768	0.477064	0.256296	Atg101
Rnf10	0.601668	0.857696	0.256028	Rnf10
Bloc1s5	0.240573	0.496286	0.255713	Bloc1s5
Rps13	2.60938	2.86458	0.255193	Rps13
Irf9	0.132078	0.387132	0.255054	Irf9
Hcfc1r1	0.432763	0.686688	0.253925	Hcfc1r1
Gm48855	0.269037	0.522426	0.253389	Gm48855
Selenoo	0.09324	0.346363	0.253123	Selenoo
Rps15	2.72258	2.97548	0.252895	Rps15
Agpat4	0.0148494	0.267742	0.252893	Agpat4
Slc25a46	0.150773	0.40363	0.252856	Slc25a46
H2-T22	0.204032	0.456569	0.252537	H2-T22
Idua	0.0740159	0.326346	0.25233	Idua
Oard1	0.337708	0.589963	0.252255	Oard1
Gstk1	0	0.251829	0.251829	Gstk1
Aldh7a1	0.248015	0.499758	0.251744	Aldh7a1
Arsg	0.151562	0.403157	0.251595	Arsg
Zfp715	0.15155	0.402202	0.250652	Zfp715
Plbd2	0.560673	0.811231	0.250557	Plbd2
Dr1	0.0638901	0.314312	0.250422	Dr1
Tpp1	0.689307	0.939602	0.250296	Tpp1
Isca1	0.124125	0.374323	0.250198	Isca1
Ap3m2	0.15439	0.40456	0.25017	Ap3m2
Sdhaf3	0.162766	0.412922	0.250156	Sdhaf3
Tmco4	0	0.249622	0.249622	Tmco4
1810013L24Rik	0.16017	0.409708	0.249538	1810013L24Rik
Fam193a	0.108591	0.358038	0.249447	Fam193a
Cltb	0.319503	0.568613	0.24911	Cltb
Tom1l2	0.112512	0.361575	0.249063	Tom1l2
Tcp11l2	0.1004	0.349414	0.249014	Tcp11l2
Gsap	0.121649	0.370015	0.248366	Gsap
Csde1	0.40253	0.650703	0.248173	Csde1
Lsm1	0.252856	0.500894	0.248037	Lsm1
Cebpb	0.0808367	0.328644	0.247807	Cebpb
Tob2	0.268652	0.516438	0.247786	Tob2
Btf3	1.67115	1.91894	0.247785	Btf3
Med11	0.26801	0.51518	0.24717	Med11
Xab2	0.0650498	0.312028	0.246979	Xab2
Derl2	0.819203	1.06574	0.246537	Derl2
Zfp236	0.0269613	0.273454	0.246493	Zfp236
Rps21	2.34203	2.58798	0.245948	Rps21
Ivd	0.105787	0.351483	0.245695	Ivd
Cebpa	0.959726	1.20535	0.245629	Cebpa
Sat1	1.87493	2.12051	0.245581	Sat1
Pcna	0.248097	0.493286	0.245189	Pcna
Timp2	1.71225	1.9574	0.245152	Timp2
Ercc1	0.192431	0.437495	0.245064	Ercc1
Zfp263	0.217992	0.46248	0.244488	Zfp263
Glmp	0.904839	1.149	0.244158	Glmp
Dffb	0	0.244023	0.244023	Dffb
Rplp1	3.43985	3.68384	0.243981	Rplp1
Vgf	0	0.243923	0.243923	Vgf
Rab2b	0.0862209	0.330114	0.243893	Rab2b
Emc8	0.237151	0.4804	0.243249	Emc8
Thoc5	0.046481	0.289605	0.243124	Thoc5
Ipo11	0.142927	0.386006	0.243079	Ipo11
Prpf40a	0.490928	0.733873	0.242945	Prpf40a
Tmed8	0.0319562	0.274807	0.24285	Tmed8
Ddx41	0.173108	0.415951	0.242843	Ddx41
Ddx47	0.237632	0.479843	0.242212	Ddx47
Zcchc8	0.0862611	0.328111	0.24185	Zcchc8
Nudcd2	0.218882	0.460729	0.241847	Nudcd2
Eif6	0.649275	0.891086	0.241811	Eif6
Ube4a	0.0888795	0.330624	0.241745	Ube4a
Map3k1	0.201882	0.443496	0.241614	Map3k1
Rpl27a	2.93678	3.17823	0.241445	Rpl27a
G6pdx	0.0817653	0.32316	0.241394	G6pdx
Eif2d	0.0855336	0.326913	0.24138	Eif2d
Nr2c2ap	0.282529	0.523623	0.241094	Nr2c2ap
Abt1	0.0155152	0.256421	0.240906	Abt1
Tshz1	0	0.240506	0.240506	Tshz1
Mpped1	0.0237643	0.264216	0.240452	Mpped1
Tmem175	0.21211	0.452237	0.240128	Tmem175
Gbp3	0.0847527	0.324424	0.239671	Gbp3
Cntn1	0	0.239622	0.239622	Cntn1
Tmem160	0.829741	1.06923	0.239492	Tmem160
Arrb2	1.064	1.30345	0.239449	Arrb2
Tpcn1	0.24812	0.487404	0.239284	Tpcn1
Wipi2	0.225716	0.46482	0.239104	Wipi2
Abhd17c	0.18957	0.428536	0.238966	Abhd17c
Dld	0.272633	0.511336	0.238703	Dld
Rpl10-ps3	2.37877	2.61743	0.238656	Rpl10-ps3
Trmt112	1.18182	1.4204	0.238587	Trmt112
Vbp1	0.429155	0.667674	0.238519	Vbp1
Bak1	0.10598	0.344496	0.238516	Bak1
Rgl1	0.231271	0.469743	0.238472	Rgl1
Atp6v0b	1.96645	2.20487	0.238416	Atp6v0b
Ctns	0.143263	0.381467	0.238204	Ctns
Itfg1	0.517997	0.756151	0.238154	Itfg1
Babam1	0.218711	0.456794	0.238083	Babam1
Derl1	0.960645	1.19858	0.237932	Derl1
Fam117b	0.160684	0.398412	0.237728	Fam117b
Faim2	0	0.237223	0.237223	Faim2
Fam92a	0.0783659	0.315576	0.23721	Fam92a
Zfp275	0.0837804	0.320939	0.237159	Zfp275
Sfi1	0.240664	0.477576	0.236911	Sfi1
Ppp2r3d	0.236016	0.472774	0.236758	Ppp2r3d
Rap2a	0.0633864	0.300107	0.236721	Rap2a
Gnal	0	0.236703	0.236703	Gnal
Mcrs1	0.379269	0.615913	0.236644	Mcrs1
Rnf138	0.219813	0.456367	0.236553	Rnf138
Ang	1.09723	1.33348	0.236255	Ang
Rps3	2.88117	3.11726	0.236088	Rps3
2310011J03Rik	0.366203	0.60222	0.236017	2310011J03Rik
Snca	0	0.236011	0.236011	Snca
Rasgef1a	0	0.236011	0.236011	Rasgef1a
Dock6	0	0.235348	0.235348	Dock6
Cnep1r1	0.269372	0.504553	0.235181	Cnep1r1
Itgav	0.521372	0.756463	0.235091	Itgav
Uba6	0.0212144	0.2562	0.234986	Uba6
Atf2	0.139086	0.373883	0.234797	Atf2
Notch4	0	0.234342	0.234342	Notch4
Alox5ap	1.51082	1.74516	0.234338	Alox5ap
Tubb4a	0	0.234281	0.234281	Tubb4a
Aldoa	1.73345	1.96766	0.234205	Aldoa
Atxn2	0.222708	0.456488	0.23378	Atxn2
Psma1	1.15161	1.38517	0.23356	Psma1
Dohh	0.394298	0.627779	0.233481	Dohh
Aktip	0.232439	0.464889	0.232449	Aktip
Susd4	0	0.232413	0.232413	Susd4
Cmtm5	0	0.232413	0.232413	Cmtm5
Cmtm4	0	0.232412	0.232412	Cmtm4
Dennd5a	0.247447	0.47971	0.232263	Dennd5a
Oaf	0.32697	0.559226	0.232256	Oaf
Anxa6	0.277535	0.509698	0.232163	Anxa6
Cd33	0.996107	1.22824	0.232133	Cd33
Ociad1	0.943679	1.17571	0.232035	Ociad1
Atp6v1c1	0.560898	0.792852	0.231954	Atp6v1c1
Impdh2	0.328507	0.55979	0.231283	Impdh2
Pabpn1	0.0148494	0.246113	0.231264	Pabpn1
Bcap31	1.01748	1.24831	0.230831	Bcap31
Tuba4a	0.0740889	0.304914	0.230825	Tuba4a
Rmi1	0.162316	0.392916	0.2306	Rmi1
Rps20	2.3781	2.60869	0.230591	Rps20
Sept1	0	0.230401	0.230401	Sept1
Plekha1	0.188194	0.418558	0.230363	Plekha1
Cep89	0.129377	0.359707	0.23033	Cep89
Sphk2	0.124387	0.354511	0.230124	Sphk2
Hebp1	0.595525	0.825612	0.230087	Hebp1
Mad2l2	0.254919	0.484897	0.229977	Mad2l2
Naxd	0.52537	0.754943	0.229573	Naxd
Tgds	0.0898295	0.319274	0.229444	Tgds
Coq10b	0.24003	0.469037	0.229007	Coq10b
Stard3nl	0.53999	0.768958	0.228968	Stard3nl
Tmem100	0.7207	0.949511	0.228811	Tmem100
Smpd5	0.176954	0.405683	0.228729	Smpd5
Phf2	0.0712411	0.299707	0.228466	Phf2
Rap1gds1	0.497087	0.72537	0.228283	Rap1gds1
Tmeff2	0	0.227945	0.227945	Tmeff2
Grin1	0	0.227945	0.227945	Grin1
Slc24a2	0	0.227945	0.227945	Slc24a2
Ephx4	0	0.227945	0.227945	Ephx4
Lrfn5	0	0.227945	0.227945	Lrfn5
Dbpht2	0	0.227945	0.227945	Dbpht2
Rgs6	0	0.227945	0.227945	Rgs6
Acot6	0	0.227945	0.227945	Acot6
Cpne5	0	0.227945	0.227945	Cpne5
Nubp1	0.224585	0.452399	0.227814	Nubp1
Ikzf1	0.762308	0.990087	0.227779	Ikzf1
Ppp6r3	0.259448	0.487137	0.227689	Ppp6r3
Stat2	0.149351	0.376783	0.227432	Stat2
Rnh1	0.773383	1.00079	0.227405	Rnh1
Gosr2	0.305082	0.532438	0.227356	Gosr2
Rpl7a	1.81677	2.04388	0.227109	Rpl7a
Nxf1	0.61516	0.841944	0.226784	Nxf1
Acbd4	0	0.22662	0.22662	Acbd4
Psmg2	0.197092	0.423555	0.226463	Psmg2
Evi2a	1.54422	1.7706	0.226377	Evi2a
Ap1ar	0.0624808	0.288612	0.226131	Ap1ar
Efcab14	0.309557	0.535612	0.226055	Efcab14
Map1lc3b	1.16098	1.38701	0.226027	Map1lc3b
Bloc1s2	0.35389	0.57986	0.22597	Bloc1s2
Zfp991	0.142237	0.367985	0.225748	Zfp991
Rpl9-ps1	0.0780823	0.303571	0.225489	Rpl9-ps1
Ucp2	0.769126	0.994599	0.225472	Ucp2
Gphn	0	0.225107	0.225107	Gphn
Cd24a	0	0.22507	0.22507	Cd24a
Qtrt1	0.235018	0.459918	0.2249	Qtrt1
Txndc9	0.583107	0.807772	0.224666	Txndc9
Crat	0.253446	0.477863	0.224417	Crat
Pkd2	0.0409005	0.265265	0.224365	Pkd2
Ei24	0.402211	0.62637	0.224158	Ei24
Swap70	0.472078	0.69586	0.223782	Swap70
Tbc1d16	0.0740482	0.297817	0.223769	Tbc1d16
Sarnp	0.662878	0.886638	0.22376	Sarnp
Rpp25l	0.277449	0.501087	0.223638	Rpp25l
Yaf2	0.26946	0.493058	0.223598	Yaf2
Calu	0.364191	0.58775	0.223559	Calu
Ergic3	1.14604	1.36952	0.223483	Ergic3
Cdk12	0.420693	0.643918	0.223225	Cdk12
Cfl2	0.228502	0.451634	0.223132	Cfl2
Adgrb2	0	0.223119	0.223119	Adgrb2
Mfap3	0.493431	0.716381	0.22295	Mfap3
Ntpcr	1.10072	1.32355	0.222827	Ntpcr
Pmp22	1.30869	1.5315	0.222816	Pmp22
Plcb1	0	0.22272	0.22272	Plcb1
Reps1	0.0299774	0.25269	0.222713	Reps1
Mrpl52	1.41358	1.63616	0.222577	Mrpl52
Ppm1e	0	0.222162	0.222162	Ppm1e
Usp50	0.265329	0.487401	0.222071	Usp50
Cpd	0.0922566	0.314311	0.222054	Cpd
Washc5	0.0159854	0.237989	0.222004	Washc5
Hmga1	0	0.221917	0.221917	Hmga1
Fam76a	0.160785	0.382634	0.221849	Fam76a
Rex1bd	0.482074	0.70383	0.221756	Rex1bd
Mroh1	0.150895	0.372479	0.221584	Mroh1
Hmox1	0.175368	0.396905	0.221537	Hmox1
Igbp1	0.485754	0.70729	0.221536	Igbp1
Pitpnc1	0.377036	0.598506	0.22147	Pitpnc1
Rps17	2.45421	2.67552	0.221311	Rps17
Acp2	0.472887	0.694131	0.221244	Acp2
Cdk19	0.222406	0.44342	0.221015	Cdk19
Exo5	0.0242492	0.245247	0.220998	Exo5
Cxcl12	0	0.220887	0.220887	Cxcl12
Nhlrc2	0	0.220882	0.220882	Nhlrc2
Fbxo3	0.10478	0.325618	0.220838	Fbxo3
Tars	0.204665	0.425266	0.220601	Tars
Ap1m1	0.200235	0.420608	0.220373	Ap1m1
Ralbp1	0.649864	0.870233	0.220369	Ralbp1
Abhd14a	0.0159854	0.236238	0.220253	Abhd14a
Kpna3	0.28994	0.510145	0.220204	Kpna3
Nfkbie	0.0921461	0.312317	0.220171	Nfkbie
Pex5	0.196083	0.416149	0.220066	Pex5
Gstm5	0.382605	0.602492	0.219887	Gstm5
Pnpla8	0.549562	0.769417	0.219856	Pnpla8
Synrg	0.307013	0.526841	0.219827	Synrg
2510039O18Rik	0.323047	0.542497	0.21945	2510039O18Rik
Atrnl1	0	0.219368	0.219368	Atrnl1
Fbxo6	0.13425	0.353615	0.219365	Fbxo6
Sgf29	0.0547082	0.273993	0.219284	Sgf29
Clec4a3	0.505103	0.724369	0.219266	Clec4a3
Fdxr	0.0276196	0.246512	0.218893	Fdxr
Mpg	0.245895	0.464494	0.218599	Mpg
Hax1	0.306924	0.525487	0.218563	Hax1
Hnrnpdl	0.598363	0.816683	0.21832	Hnrnpdl
Adam17	0.28609	0.504326	0.218236	Adam17
Sort1	0.27426	0.492417	0.218157	Sort1
Msl1	0.332155	0.550042	0.217887	Msl1
Fmc1	0.322087	0.53968	0.217593	Fmc1
Mum1	0.0595024	0.277083	0.217581	Mum1
Ncoa4	0.577918	0.795425	0.217506	Ncoa4
Cuedc2	0.897574	1.115	0.217429	Cuedc2
Fes	0.406117	0.623471	0.217354	Fes
Dnajc1	0.305502	0.522665	0.217163	Dnajc1
Sema4c	0.2101	0.426876	0.216776	Sema4c
Xrcc1	0.161876	0.378422	0.216546	Xrcc1
Pafah1b3	0.323388	0.539487	0.216098	Pafah1b3
Rbm3	1.10877	1.32482	0.216049	Rbm3
Rpl6	2.81473	3.03066	0.215932	Rpl6
Polr2i	0.542001	0.757896	0.215895	Polr2i
Cdk11b	0.416983	0.632875	0.215892	Cdk11b
Neat1	0.214954	0.430727	0.215773	Neat1
Pcdh19	0	0.215732	0.215732	Pcdh19
Ubxn1	0.527922	0.743583	0.215661	Ubxn1
Ncln	0.356559	0.571859	0.215299	Ncln
Acsf2	0	0.215142	0.215142	Acsf2
Gtf2ird1	0.0299774	0.244702	0.214725	Gtf2ird1
BC005537	0.328529	0.543159	0.21463	BC005537
Cerk	0.535272	0.749792	0.21452	Cerk
Fam20b	0.0444557	0.258628	0.214173	Fam20b
Mthfd2	0.143019	0.357053	0.214035	Mthfd2
Nfkbil1	0.163661	0.377574	0.213913	Nfkbil1
Rpn1	0.733428	0.947277	0.213849	Rpn1
Erp29	1.56606	1.77979	0.213722	Erp29
Ctsd	4.47747	4.69114	0.213666	Ctsd
Gripap1	0.405451	0.619099	0.213648	Gripap1
1190007I07Rik	0.175301	0.388869	0.213568	1190007I07Rik
Cdk4	0.532797	0.746355	0.213558	Cdk4
Cipc	0.0159854	0.22946	0.213475	Cipc
Ero1l	0.0497443	0.263007	0.213262	Ero1l
Tmem70	0.331457	0.544331	0.212874	Tmem70
Gucy1a1	0.0224363	0.235201	0.212765	Gucy1a1
Eid2	0.0159854	0.227945	0.21196	Eid2
Prkcb	0.34656	0.558353	0.211794	Prkcb
Foxp1	0.311337	0.523108	0.211771	Foxp1
Bhlhe41	0.830602	1.04223	0.211631	Bhlhe41
Lsm10	0.340044	0.551525	0.211481	Lsm10
Fndc3a	0.349548	0.560663	0.211115	Fndc3a
Pdcd7	0.0584791	0.269515	0.211036	Pdcd7
Lmnb2	0.0237594	0.234738	0.210978	Lmnb2
Tmem63a	0.408724	0.619695	0.210971	Tmem63a
Samd8	0.144348	0.355294	0.210947	Samd8
Elp5	0.299539	0.510434	0.210896	Elp5
Bcl2l1	0.629984	0.840374	0.210389	Bcl2l1
Rps26	2.11022	2.32052	0.210305	Rps26
Dpm3	0.904576	1.11487	0.210297	Dpm3
Hmgn2	0.499283	0.709451	0.210168	Hmgn2
Spg11	0.0690854	0.278878	0.209793	Spg11
Kdsr	0.178087	0.387853	0.209766	Kdsr
Tstd3	0.0150047	0.224743	0.209739	Tstd3
1810043G02Rik	0.0924312	0.301874	0.209443	1810043G02Rik
Vsir	2.60245	2.81169	0.209241	Vsir
Ado	0.133712	0.342879	0.209167	Ado
Gatsl3	0.118104	0.327159	0.209055	Gatsl3
Insig2	0.347732	0.556689	0.208957	Insig2
Tnfrsf1a	0.69651	0.905372	0.208863	Tnfrsf1a
Gabarapl1	0.344003	0.552852	0.208849	Gabarapl1
Cct2	0.479077	0.687712	0.208635	Cct2
Fkbp3	0.565214	0.773516	0.208302	Fkbp3
Spock2	0.0148494	0.223076	0.208227	Spock2
Ptdss1	0.105304	0.313526	0.208222	Ptdss1
Cdkn2d	0.134411	0.342536	0.208125	Cdkn2d
Gtf3a	0.24525	0.453347	0.208097	Gtf3a
Kcnd1	0.100351	0.308396	0.208046	Kcnd1
Nr2c2	0.0409005	0.24894	0.208039	Nr2c2
Dopey2	0.189082	0.396995	0.207913	Dopey2
Bach2	0.0597992	0.26766	0.207861	Bach2
Slc35f5	0.0701896	0.278042	0.207853	Slc35f5
Wbp11	0.254561	0.462356	0.207796	Wbp11
Rpl21	2.92977	3.13754	0.207767	Rpl21
Slc7a1	0.071232	0.278921	0.207689	Slc7a1
Relt	0	0.207529	0.207529	Relt
Eef1a1	3.27792	3.48532	0.207397	Eef1a1
Extl3	0.271824	0.479093	0.207269	Extl3
Csf2rb	0.192051	0.398786	0.206735	Csf2rb
Pole4	0.284414	0.491062	0.206648	Pole4
2610528A11Rik	0.31072	0.517262	0.206542	2610528A11Rik
Arhgdig	0	0.20619	0.20619	Arhgdig
Mttp	0.177471	0.383476	0.206006	Mttp
Mitd1	0.0391803	0.24518	0.206	Mitd1
Rpl8	2.46295	2.66891	0.205954	Rpl8
Orc4	0.079468	0.285127	0.205659	Orc4
Stk24	0.484306	0.689871	0.205565	Stk24
AC146911.1	0.163242	0.368751	0.205508	AC146911.1
Rpl29	2.21847	2.42386	0.205385	Rpl29
Aim2	0.498443	0.703628	0.205185	Aim2
Pacs2	0.149833	0.354976	0.205144	Pacs2
Klc2	0.0903881	0.295431	0.205043	Klc2
Elavl1	0.418553	0.623567	0.205014	Elavl1
Samd9l	0	0.204731	0.204731	Samd9l
Lrrc59	0.30753	0.512126	0.204595	Lrrc59
Snx9	0.0950783	0.299664	0.204586	Snx9
Ccar2	0.0591618	0.263619	0.204457	Ccar2
Gmpr2	0.627359	0.831784	0.204425	Gmpr2
Pmm1	0.118806	0.323155	0.204349	Pmm1
Ccdc85b	0.138967	0.343277	0.20431	Ccdc85b
Rab35	0.504303	0.708456	0.204153	Rab35
Pex11a	0.0237642	0.227891	0.204127	Pex11a
Mafg	0.508381	0.712404	0.204023	Mafg
Ifi27	0.761723	0.965535	0.203812	Ifi27
Rnf130	0.86088	1.06461	0.203733	Rnf130
Plod3	0.439763	0.643469	0.203706	Plod3
Pbxip1	0.501072	0.70464	0.203568	Pbxip1
Mrm1	0.0505378	0.253961	0.203423	Mrm1
Fut9	0	0.203287	0.203287	Fut9
Wiz	0.0825887	0.285859	0.20327	Wiz
Fbxw11	0.117253	0.32016	0.202907	Fbxw11
Smg9	0.364958	0.567814	0.202856	Smg9
Nkiras1	0.149864	0.352658	0.202795	Nkiras1
Mrps16	0.589308	0.792047	0.202739	Mrps16
Shisa5	1.02284	1.2253	0.202457	Shisa5
Arhgap9	0.388365	0.590769	0.202404	Arhgap9
2310061I04Rik	0.170194	0.372559	0.202365	2310061I04Rik
Smu1	0.381036	0.583346	0.20231	Smu1
Commd7	0.50884	0.711116	0.202276	Commd7
Pde12	0.116014	0.31824	0.202226	Pde12
Ndufa5	0.888431	1.09054	0.202114	Ndufa5
Tnfrsf1b	0.458436	0.660518	0.202082	Tnfrsf1b
Txndc16	0.0709229	0.272655	0.201732	Txndc16
Ebag9	0.164536	0.366229	0.201692	Ebag9
Pank2	0.13421	0.335797	0.201587	Pank2
Gm16286	0.757912	0.959468	0.201556	Gm16286
Ube2v2	0.440862	0.642384	0.201522	Ube2v2
Clasp2	0.247698	0.449147	0.201449	Clasp2
Ppp4c	0.638875	0.840204	0.20133	Ppp4c
Tspan9	0.115289	0.316596	0.201307	Tspan9
Nubp2	0.209577	0.410744	0.201166	Nubp2
AI467606	0.251229	0.452182	0.200952	AI467606
Znhit2	0.094211	0.294889	0.200678	Znhit2
Srp68	0.212321	0.412965	0.200644	Srp68
Map1s	0.146696	0.34714	0.200445	Map1s
Rpl9-ps6	1.67254	1.87291	0.200363	Rpl9-ps6
Trmt10c	0.131611	0.331879	0.200268	Trmt10c
Gm12216	0.0611366	0.261366	0.200229	Gm12216
Alg5	0.549831	0.750016	0.200185	Alg5
Ppp1r15b	0.155226	0.355396	0.20017	Ppp1r15b
Atp23	0	0.200124	0.200124	Atp23
Hck	0.859162	1.05926	0.200099	Hck
Rgs7bp	0.12237	0.32233	0.19996	Rgs7bp
Spsb3	0.151782	0.351615	0.199833	Spsb3
Unk	0.177321	0.377142	0.199821	Unk
F3	0	0.199403	0.199403	F3
Ralgds	0.0217679	0.221073	0.199305	Ralgds
Shprh	0.135462	0.334715	0.199253	Shprh
Rps5	2.71845	2.91761	0.199161	Rps5
Nr2f6	0.194682	0.393625	0.198943	Nr2f6
Maea	0.383629	0.58253	0.198901	Maea
Tmem69	0.038142	0.237029	0.198887	Tmem69
Gdap1l1	0.0217679	0.220596	0.198829	Gdap1l1
Med7	0.252228	0.451043	0.198815	Med7
Hspb3	0.197926	0.396691	0.198765	Hspb3
Adipor1	1.03693	1.23534	0.198411	Adipor1
Cox7a2	1.31153	1.50988	0.198346	Cox7a2
Adipor2	0.199532	0.397584	0.198052	Adipor2
Rundc3a	0	0.197991	0.197991	Rundc3a
Rac2	1.0864	1.28432	0.19792	Rac2
Tnfrsf17	0.372698	0.570576	0.197877	Tnfrsf17
Snrpa	0.524578	0.722428	0.19785	Snrpa
Mblac2	0.0301309	0.227945	0.197814	Mblac2
Sft2d2	0.271897	0.469632	0.197735	Sft2d2
Sdc3	0.0685782	0.266071	0.197493	Sdc3
Plat	0.0935696	0.290748	0.197178	Plat
Khsrp	0.0546989	0.251542	0.196843	Khsrp
Axl	0.0346277	0.231447	0.19682	Axl
F11r	1.56517	1.76162	0.196449	F11r
Suclg1	0.512513	0.708934	0.196421	Suclg1
Mfsd14b	0.28343	0.479812	0.196382	Mfsd14b
Epn1	0.755581	0.951712	0.196132	Epn1
Camk2b	0.0320345	0.227945	0.195911	Camk2b
Abhd12	1.95092	2.14683	0.195908	Abhd12
Slc25a11	0.898745	1.09465	0.195908	Slc25a11
Tfe3	0.54048	0.736302	0.195823	Tfe3
Park7	1.26418	1.45973	0.195542	Park7
Sox5	0	0.195291	0.195291	Sox5
Tmem177	0.159329	0.354615	0.195286	Tmem177
Tspan14	0.688877	0.884134	0.195257	Tspan14
Ttl	0.0244915	0.21966	0.195169	Ttl
Chst14	0.0575552	0.252697	0.195141	Chst14
Wwc2	0.152237	0.347255	0.195018	Wwc2
Prr5	0.0280945	0.223007	0.194912	Prr5
B230307C23Rik	0.0269613	0.221606	0.194645	B230307C23Rik
Mrpl43	0.728514	0.923071	0.194557	Mrpl43
Micu3	0.040051	0.234557	0.194506	Micu3
2310039H08Rik	0.0866079	0.281104	0.194496	2310039H08Rik
Ift20	0.539795	0.73414	0.194345	Ift20
Rpl17	2.93497	3.12917	0.194199	Rpl17
Sbno2	0.136616	0.330704	0.194088	Sbno2
Ddx56	0.267344	0.461402	0.194059	Ddx56
Rpl7	2.4849	2.67881	0.193902	Rpl7
Mecr	0.106671	0.300199	0.193528	Mecr
Myef2	0.0808193	0.27434	0.193521	Myef2
Tmem222	0.466202	0.659705	0.193502	Tmem222
Krba1	0.0333231	0.226792	0.193469	Krba1
Tpi1	0.85693	1.0503	0.193371	Tpi1
Cdk5	0.0912914	0.284657	0.193366	Cdk5
Bace1	0.129093	0.322436	0.193343	Bace1
Rab22a	0.0811694	0.274469	0.193299	Rab22a
Lrp12	0.0683923	0.261572	0.193179	Lrp12
Cdv3	0.295733	0.488899	0.193167	Cdv3
Zc3h18	0.171797	0.364874	0.193077	Zc3h18
Rps6kb1	0.362092	0.555091	0.192999	Rps6kb1
Tifa	0.534407	0.727372	0.192965	Tifa
Pptc7	0.0780505	0.270971	0.192921	Pptc7
Csmd3	0.580637	0.773136	0.192499	Csmd3
Etfrf1	0.0965888	0.289079	0.19249	Etfrf1
Sav1	0	0.192408	0.192408	Sav1
Magohb	0.109415	0.301743	0.192328	Magohb
Atad1	0.476304	0.668532	0.192228	Atad1
Klhl20	0.0549983	0.247178	0.192179	Klhl20
Cbx5	0.126366	0.318489	0.192123	Cbx5
Sharpin	0.275612	0.466985	0.191373	Sharpin
Slc25a30	0.0809752	0.272296	0.191321	Slc25a30
Serpini1	0.0333231	0.224632	0.191309	Serpini1
H2-Ke6	0.412518	0.603799	0.191281	H2-Ke6
Tbc1d17	0.26737	0.458528	0.191158	Tbc1d17
Arhgdib	1.6261	1.81723	0.191126	Arhgdib
Cinp	0.0928817	0.283981	0.191099	Cinp
Yeats4	0.282187	0.473032	0.190845	Yeats4
Scg5	0.0769907	0.267742	0.190751	Scg5
Gramd1a	0.394182	0.584803	0.19062	Gramd1a
Zbtb14	0.096627	0.286898	0.190271	Zbtb14
Banf1	0.402375	0.592441	0.190066	Banf1
Cpt1a	0	0.190014	0.190014	Cpt1a
Tcf20	0.0756958	0.265682	0.189986	Tcf20
Rasgrp1	0	0.189912	0.189912	Rasgrp1
Dexi	0.10851	0.298098	0.189587	Dexi
Mnt	0.0775739	0.266895	0.189321	Mnt
AI314180	0.0894953	0.278768	0.189272	AI314180
Desi1	0.184714	0.373958	0.189243	Desi1
Fbxl20	0.13292	0.322064	0.189144	Fbxl20
Bcl2l12	0.0685636	0.257663	0.1891	Bcl2l12
Chmp5	0.656861	0.845945	0.189084	Chmp5
Vash1	0.031528	0.220596	0.189068	Vash1
Lpin1	0.174853	0.363744	0.188891	Lpin1
Prkce	0.071278	0.259952	0.188674	Prkce
Nutf2	0.0396884	0.228302	0.188614	Nutf2
Zfp933	0	0.188531	0.188531	Zfp933
Myo5a	0.0138397	0.202205	0.188366	Myo5a
Pcbp2	0.72577	0.914115	0.188344	Pcbp2
Psmg1	0.138534	0.326788	0.188254	Psmg1
Alg11	0.155515	0.343719	0.188204	Alg11
Ppm1h	0.455383	0.643479	0.188096	Ppm1h
Atad2	0.0399188	0.227945	0.188026	Atad2
Tefm	0.0774191	0.265443	0.188024	Tefm
Uvssa	0.239128	0.426919	0.187791	Uvssa
Paqr9	0	0.187738	0.187738	Paqr9
Susd5	0	0.187738	0.187738	Susd5
Rbms3	0	0.187738	0.187738	Rbms3
D830035M03Rik	0	0.187738	0.187738	D830035M03Rik
Ryr2	0	0.187738	0.187738	Ryr2
Papd7	0	0.187738	0.187738	Papd7
Cdh6	0	0.187738	0.187738	Cdh6
Ropn1l	0	0.187738	0.187738	Ropn1l
Slc2a13	0	0.187738	0.187738	Slc2a13
Rsph9	0	0.187738	0.187738	Rsph9
Efna5	0	0.187738	0.187738	Efna5
Tmem151a	0	0.187738	0.187738	Tmem151a
Gpc1	0	0.187738	0.187738	Gpc1
B3galt2	0	0.187738	0.187738	B3galt2
Cdh4	0	0.187738	0.187738	Cdh4
Cdkl5	0	0.187738	0.187738	Cdkl5
Usp13	0	0.187738	0.187738	Usp13
Dclk2	0	0.187738	0.187738	Dclk2
Chrnb2	0	0.187738	0.187738	Chrnb2
Cntfr	0	0.187738	0.187738	Cntfr
Gabbr2	0	0.187738	0.187738	Gabbr2
Svop	0	0.187738	0.187738	Svop
Wasf3	0	0.187738	0.187738	Wasf3
Tmem178b	0	0.187738	0.187738	Tmem178b
Wipf3	0	0.187738	0.187738	Wipf3
Stk32c	0	0.187738	0.187738	Stk32c
Sobp	0	0.187738	0.187738	Sobp
Nt5dc3	0	0.187738	0.187738	Nt5dc3
Nol3	0	0.187738	0.187738	Nol3
Icam5	0	0.187738	0.187738	Icam5
Fhod1	0.0657399	0.25347	0.187731	Fhod1
Mt2	0.580988	0.768706	0.187718	Mt2
Znrf1	0.262101	0.449643	0.187542	Znrf1
Pigu	0.203438	0.390774	0.187336	Pigu
Josd1	0.115906	0.303236	0.18733	Josd1
Ikbkg	0.047021	0.234346	0.187325	Ikbkg
Bcat2	0.121372	0.308653	0.187281	Bcat2
Stard8	0.069081	0.256162	0.187081	Stard8
Ddost	0.880723	1.06774	0.187015	Ddost
Ndufb6	0.669374	0.856232	0.186858	Ndufb6
Akr1b10	0.855347	1.04221	0.186858	Akr1b10
Mapk7	0.0346277	0.221442	0.186815	Mapk7
Smc4	0.044883	0.231661	0.186778	Smc4
Mal	0.0883995	0.275118	0.186718	Mal
Tmcc2	0.0412591	0.227945	0.186686	Tmcc2
Rabl2	0.0690969	0.255508	0.186412	Rabl2
Uba5	0.436533	0.622733	0.1862	Uba5
Slc25a26	0.0298708	0.215935	0.186064	Slc25a26
Tspan7	1.04323	1.22928	0.186049	Tspan7
Mtx2	0.239925	0.425778	0.185853	Mtx2
Parp2	0.240853	0.426617	0.185764	Parp2
Rnpep	0.554185	0.739874	0.185689	Rnpep
Ralb	0.764473	0.950095	0.185621	Ralb
Smc6	0.341556	0.527166	0.18561	Smc6
Coq8a	0	0.185342	0.185342	Coq8a
Szrd1	0.217418	0.402666	0.185249	Szrd1
Kras	0.459973	0.645128	0.185155	Kras
Zfp825	0.0928091	0.277959	0.18515	Zfp825
Abcd3	0.295611	0.480761	0.18515	Abcd3
Sh3glb2	0.182397	0.36753	0.185133	Sh3glb2
Pop5	0.31645	0.501551	0.185101	Pop5
Entpd6	0.0240018	0.208859	0.184857	Entpd6
Stk39	0	0.18479	0.18479	Stk39
Mrps18c	0.356253	0.541013	0.184759	Mrps18c
Nrbf2	0.294369	0.479112	0.184743	Nrbf2
Gm5239	0.162832	0.347355	0.184523	Gm5239
Cd37	1.84083	2.02509	0.184257	Cd37
Selenow	0.925416	1.10958	0.184166	Selenow
Olfml2b	0.170461	0.354472	0.184012	Olfml2b
Kmt2e	0.636327	0.819831	0.183503	Kmt2e
Ap2m1	1.11235	1.29573	0.183383	Ap2m1
Pip4k2b	0.0346277	0.218	0.183373	Pip4k2b
Gns	1.1957	1.37881	0.183111	Gns
Bod1l	0.584426	0.767394	0.182967	Bod1l
BC037034	0.584755	0.767687	0.182933	BC037034
Zfp770	0.0970557	0.279476	0.18242	Zfp770
Med28	0.873054	1.05532	0.182269	Med28
Rpl27-ps3	1.30785	1.48997	0.182116	Rpl27-ps3
Nat14	0.0566628	0.23863	0.181968	Nat14
Arf6	0.339002	0.520884	0.181882	Arf6
Hk3	0.309004	0.490773	0.181769	Hk3
Gm11713	0.142419	0.324167	0.181748	Gm11713
BC017643	0.638204	0.819921	0.181717	BC017643
Fau	3.49477	3.67648	0.18171	Fau
Slc9a8	0.0244915	0.20619	0.181698	Slc9a8
Fut11	0.052484	0.234083	0.181598	Fut11
Opcml	0.0276781	0.20927	0.181592	Opcml
Mri1	0.20993	0.391175	0.181245	Mri1
Ormdl3	0.297829	0.479041	0.181212	Ormdl3
Sf3b5	0.54003	0.721158	0.181128	Sf3b5
Snapc2	0.0607715	0.241593	0.180822	Snapc2
Ankrd12	0.368345	0.548977	0.180632	Ankrd12
Itsn2	0.27429	0.454909	0.180619	Itsn2
Becn1	0.360464	0.541076	0.180612	Becn1
Dnm2	0.843029	1.02354	0.180512	Dnm2
Phf13	0.0224363	0.202869	0.180433	Phf13
Atg13	0	0.18022	0.18022	Atg13
Tmem80	0.0695056	0.249527	0.180021	Tmem80
Abhd11	0.175781	0.355703	0.179922	Abhd11
Gimap6	0.258902	0.438737	0.179836	Gimap6
Etv1	0.309763	0.489508	0.179745	Etv1
Hacd1	0	0.179591	0.179591	Hacd1
Ncoa1	0.134202	0.313526	0.179325	Ncoa1
Rab9	0.303174	0.482491	0.179317	Rab9
Fip1l1	0.330465	0.509773	0.179308	Fip1l1
3110035E14Rik	0.0240018	0.203287	0.179285	3110035E14Rik
Zfp318	0.0435831	0.22272	0.179137	Zfp318
Tnrc18	0.227778	0.406897	0.179119	Tnrc18
Arid4a	0.402014	0.581031	0.179017	Arid4a
A430005L14Rik	0.0958542	0.274777	0.178923	A430005L14Rik
Drg2	0.309138	0.488005	0.178866	Drg2
Pds5a	0.115415	0.294137	0.178722	Pds5a
Marcksl1	0.408064	0.586688	0.178624	Marcksl1
Gm10260	0.114331	0.292865	0.178535	Gm10260
Zfp511	0.12717	0.305566	0.178396	Zfp511
Tubb2a	0.536858	0.715153	0.178295	Tubb2a
Als2	0	0.178172	0.178172	Als2
Npy	0	0.178172	0.178172	Npy
1700041G16Rik	0	0.178172	0.178172	1700041G16Rik
Yjefn3	0	0.178172	0.178172	Yjefn3
Chst8	0.121993	0.299832	0.177839	Chst8
Gm5141	0.0247804	0.202557	0.177776	Gm5141
Ncstn	0.258709	0.436348	0.177639	Ncstn
Tbc1d20	0.1618	0.339425	0.177625	Tbc1d20
Sdc4	0.0769543	0.25455	0.177596	Sdc4
Wbp1l	0.100248	0.277585	0.177337	Wbp1l
Rps7	2.60596	2.78317	0.177208	Rps7
Ndufv3	0.990808	1.16798	0.177174	Ndufv3
Asb6	0.0487062	0.225575	0.176869	Asb6
Dapk3	0.243489	0.420206	0.176718	Dapk3
Lgals3bp	0.278702	0.45537	0.176668	Lgals3bp
Cbl	0.424843	0.601468	0.176625	Cbl
Ppwd1	0.120436	0.297034	0.176598	Ppwd1
Slc18b1	0	0.17654	0.17654	Slc18b1
Aldh2	0.389563	0.566078	0.176515	Aldh2
Ppcs	0.137982	0.314477	0.176495	Ppcs
Pibf1	0.180851	0.357226	0.176374	Pibf1
Ddx3y	0.372657	0.549007	0.17635	Ddx3y
Rad17	0.130809	0.307064	0.176255	Rad17
Snrnp48	0.481385	0.657355	0.17597	Snrnp48
Tmem57	0.193688	0.369563	0.175876	Tmem57
Pomp	1.55752	1.73325	0.175727	Pomp
Phkg2	0.264635	0.440243	0.175608	Phkg2
Znrd1	0.369295	0.544854	0.175559	Znrd1
Slc31a1	0.268272	0.443704	0.175432	Slc31a1
Vars	0.267275	0.442706	0.175432	Vars
Gfm2	0.0320345	0.207462	0.175427	Gfm2
Ndufa10	0.46193	0.637307	0.175377	Ndufa10
Tspan5	0.17344	0.348816	0.175376	Tspan5
Stat5a	0.0715715	0.246926	0.175355	Stat5a
Grsf1	0.0473549	0.222691	0.175336	Grsf1
Alkbh1	0.197618	0.372872	0.175254	Alkbh1
Gnai2	1.63282	1.80795	0.175134	Gnai2
Bbip1	0.634628	0.809732	0.175104	Bbip1
Tmem179	0.0798126	0.25485	0.175037	Tmem179
Vapa	1.40997	1.58494	0.174964	Vapa
Prpf18	0.0393749	0.21431	0.174935	Prpf18
Sike1	0.142959	0.317853	0.174894	Sike1
Rnf111	0.271049	0.445925	0.174876	Rnf111
Gng13	0	0.17485	0.17485	Gng13
Serinc3	2.59825	2.77308	0.174826	Serinc3
Sppl3	0.184542	0.35882	0.174278	Sppl3
Klhl36	0.143476	0.317738	0.174262	Klhl36
Man1c1	0.273722	0.447737	0.174015	Man1c1
Zfp646	0.117426	0.291392	0.173966	Zfp646
Zcchc6	0.490864	0.664655	0.173791	Zcchc6
Smo	0.252448	0.426107	0.173659	Smo
Guf1	0.13627	0.309824	0.173554	Guf1
Erh	0.780075	0.953609	0.173534	Erh
Rabggtb	0.216653	0.390052	0.173399	Rabggtb
Gstp1	0.198111	0.371453	0.173342	Gstp1
BC028528	0.629717	0.802861	0.173144	BC028528
Flt1	0	0.173065	0.173065	Flt1
Gm10076	0.799685	0.972736	0.173051	Gm10076
Cxcl16	0.399725	0.572534	0.172809	Cxcl16
Clstn2	0.0150047	0.187738	0.172734	Clstn2
Ikbip	0.132867	0.305506	0.172639	Ikbip
Trmt10b	0.0269613	0.199547	0.172586	Trmt10b
Tbc1d9b	0.323235	0.495542	0.172306	Tbc1d9b
Spint1	0.671734	0.844017	0.172283	Spint1
H3f3a	1.70827	1.88018	0.171911	H3f3a
Mfap1b	0.32034	0.492155	0.171815	Mfap1b
Smad7	0.342808	0.514367	0.171559	Smad7
Cbfa2t3	0.290986	0.462447	0.171462	Cbfa2t3
Ralgps1	0.136975	0.308374	0.1714	Ralgps1
Dstn	1.00846	1.17983	0.171371	Dstn
Ptms	0.999689	1.17101	0.171326	Ptms
Bod1	0	0.171238	0.171238	Bod1
Mospd3	0.0380718	0.209181	0.171109	Mospd3
Rassf2	0.56539	0.736447	0.171057	Rassf2
Ostm1	0.295498	0.466482	0.170984	Ostm1
Tnfrsf13b	0.804895	0.975732	0.170837	Tnfrsf13b
Armc10	0.115683	0.286495	0.170812	Armc10
Ptpa	0.35879	0.529309	0.170518	Ptpa
Pgam1	0.902135	1.07245	0.17032	Pgam1
Pmm2	0.341706	0.511539	0.169833	Pmm2
Pgam5	0.131346	0.301156	0.16981	Pgam5
Smyd2	0.0581475	0.227945	0.169798	Smyd2
Rps28	3.17757	3.34736	0.169789	Rps28
Actg1	2.24878	2.4185	0.169723	Actg1
Tmem68	0.174471	0.34407	0.169599	Tmem68
Fry	0.0652481	0.234653	0.169405	Fry
Wdr83os	0.75239	0.921758	0.169367	Wdr83os
Mcrip2	0.112361	0.281367	0.169006	Mcrip2
Gnas	1.97978	2.14876	0.168979	Gnas
Dennd6a	0.110015	0.278983	0.168968	Dennd6a
Mief2	0.0502623	0.219046	0.168784	Mief2
Hdac9	0.117798	0.28636	0.168562	Hdac9
Slc6a1	0.134107	0.302656	0.168549	Slc6a1
Det1	0.13833	0.306757	0.168427	Det1
Kcnh7	0.0193256	0.187738	0.168413	Kcnh7
Atg4b	0.160158	0.328295	0.168137	Atg4b
Slc35f6	0.277716	0.445774	0.168058	Slc35f6
Tinf2	0.0760699	0.244092	0.168022	Tinf2
Samsn1	0.98425	1.15225	0.167997	Samsn1
Ckmt1	0.0198038	0.187738	0.167934	Ckmt1
Msrb1	0.289635	0.45751	0.167875	Msrb1
Zcwpw1	0.171977	0.339792	0.167815	Zcwpw1
Surf4	0.416938	0.5846	0.167662	Surf4
Pnpla7	0.40895	0.576541	0.167591	Pnpla7
Edem3	0.0600495	0.227631	0.167581	Edem3
Ncoa5	0.0617277	0.229239	0.167512	Ncoa5
Cacna2d1	0.120091	0.287596	0.167505	Cacna2d1
Mcl1	0.516427	0.683876	0.16745	Mcl1
Mrps10	0.22067	0.388098	0.167428	Mrps10
Atp13a1	0.172312	0.339719	0.167407	Atp13a1
Nell2	0.0360055	0.203287	0.167281	Nell2
Pex1	0.0769543	0.244107	0.167153	Pex1
Psma4	0.69145	0.858505	0.167055	Psma4
Tubg1	0.120548	0.287489	0.166941	Tubg1
Twnk	0.0780268	0.24493	0.166903	Twnk
Rpl12	1.9688	2.13566	0.166861	Rpl12
Mir124-2hg	0.0412591	0.208067	0.166808	Mir124-2hg
Ube2k	0.46477	0.631538	0.166767	Ube2k
Anxa2	0.137759	0.304333	0.166574	Anxa2
Sncb	0.100795	0.267351	0.166555	Sncb
Cap1	0.73377	0.900288	0.166518	Cap1
Atp9b	0.152282	0.318621	0.166339	Atp9b
Nagk	0.346473	0.512691	0.166218	Nagk
Syvn1	0.0667936	0.233012	0.166218	Syvn1
Ing5	0.0850123	0.251175	0.166162	Ing5
Rasgef1b	0.148247	0.314363	0.166117	Rasgef1b
Sco2	0.102187	0.268293	0.166106	Sco2
Akap11	0.119542	0.28556	0.166018	Akap11
Myo9a	0.257225	0.423174	0.165949	Myo9a
Anapc5	0.412661	0.57852	0.165859	Anapc5
Nup153	0.181965	0.347764	0.165799	Nup153
Smad3	0.223227	0.388952	0.165725	Smad3
Ric8a	0.422323	0.5878	0.165477	Ric8a
Taf12	0.278529	0.443968	0.165439	Taf12
Zfp697	0.105419	0.27085	0.165431	Zfp697
Kantr	0	0.165304	0.165304	Kantr
Cmtm6	1.93962	2.1049	0.165282	Cmtm6
Unc13d	0.0841397	0.249265	0.165125	Unc13d
Sdccag8	0.185591	0.350473	0.164881	Sdccag8
Atp5g1	1.13675	1.30151	0.164761	Atp5g1
Wdr44	0.219439	0.384159	0.16472	Wdr44
Tmem60	0.537341	0.70206	0.164719	Tmem60
Tmem165	0.410385	0.574878	0.164493	Tmem165
Wdr1	0.750928	0.915336	0.164408	Wdr1
Wscd1	0.0550163	0.21935	0.164334	Wscd1
Rab5b	0.195744	0.360049	0.164305	Rab5b
Comtd1	0.444821	0.609	0.164179	Comtd1
Cpsf1	0.0506796	0.214852	0.164172	Cpsf1
mt-Atp8	0.251852	0.415876	0.164024	mt-Atp8
Sp3os	0.140162	0.304055	0.163893	Sp3os
Got2	0.210427	0.374243	0.163816	Got2
Vamp3	0.605417	0.769129	0.163712	Vamp3
Prdx2	0.889509	1.05311	0.163605	Prdx2
Tmem87a	0.0877498	0.251283	0.163533	Tmem87a
Ndufa8	0.92926	1.09269	0.163428	Ndufa8
Tarbp2	0.0346277	0.198042	0.163414	Tarbp2
Cisd1	0.561413	0.724818	0.163405	Cisd1
Riox2	0.0586484	0.222025	0.163376	Riox2
Polrmt	0.0193256	0.182296	0.162971	Polrmt
Marc2	0.835145	0.998044	0.162899	Marc2
Repin1	0.0567776	0.219619	0.162841	Repin1
Dtnbp1	0.242076	0.404592	0.162516	Dtnbp1
Flywch1	0.0727101	0.235201	0.162491	Flywch1
Dusp3	0.397553	0.56004	0.162488	Dusp3
Cwc27	0.15136	0.313701	0.162341	Cwc27
Sgk1	1.01004	1.17237	0.162331	Sgk1
Eif4b	0.346299	0.508448	0.162149	Eif4b
Mib2	0.379853	0.541999	0.162146	Mib2
Sumf2	0.139649	0.301757	0.162108	Sumf2
Gimap1	0.40824	0.570265	0.162026	Gimap1
Siah2	0.110071	0.271857	0.161786	Siah2
Ctdsp2	0.0768215	0.238598	0.161777	Ctdsp2
R3hdm2	0.12245	0.284208	0.161757	R3hdm2
S1pr2	0	0.161753	0.161753	S1pr2
Slc33a1	0.164611	0.326313	0.161702	Slc33a1
Ssr2	0.785903	0.947518	0.161615	Ssr2
Trap1	0.283059	0.444659	0.1616	Trap1
Parp14	0.13726	0.298824	0.161564	Parp14
Mtss1	0.334227	0.495767	0.16154	Mtss1
Bambi	0	0.161464	0.161464	Bambi
Rrm1	0	0.161323	0.161323	Rrm1
Hras	0.169611	0.330834	0.161222	Hras
Arhgap15	0.0293565	0.19056	0.161204	Arhgap15
Bank1	0.305281	0.466283	0.161001	Bank1
Slc26a11	0	0.160969	0.160969	Slc26a11
Keap1	0.22792	0.388838	0.160918	Keap1
Clcn5	0.0461484	0.207027	0.160879	Clcn5
Emg1	0.732136	0.892912	0.160776	Emg1
Amz1	0.364674	0.525287	0.160613	Amz1
Klhl7	0.157859	0.318215	0.160356	Klhl7
Atp13a4	0	0.160091	0.160091	Atp13a4
Timmdc1	0	0.160091	0.160091	Timmdc1
Pde1a	0	0.160091	0.160091	Pde1a
Hmgcs2	0	0.160091	0.160091	Hmgcs2
Nasp	0	0.160091	0.160091	Nasp
Naca	2.01421	2.17417	0.159965	Naca
Ndufa13	1.67087	1.83078	0.159913	Ndufa13
Zfp954	0.137228	0.297017	0.15979	Zfp954
Ndufb9	1.07231	1.23209	0.159782	Ndufb9
Rtl8a	0.27326	0.432988	0.159728	Rtl8a
Tsc22d2	0.301338	0.461059	0.159721	Tsc22d2
Wdr45	0.10236	0.262062	0.159703	Wdr45
Mtmr12	0.0280945	0.187738	0.159644	Mtmr12
Tmem183a	0.128545	0.288121	0.159577	Tmem183a
Zfp438	0.0217679	0.181304	0.159536	Zfp438
Hspa9	0.598274	0.757776	0.159502	Hspa9
Gak	0.120219	0.279669	0.15945	Gak
Afg1l	0.0283109	0.187738	0.159427	Afg1l
9330160F10Rik	0.0639665	0.223365	0.159399	9330160F10Rik
Nde1	0.231518	0.390794	0.159275	Nde1
Gm11273	0.0449329	0.204118	0.159185	Gm11273
Nat2	0	0.158918	0.158918	Nat2
Capg	0.304014	0.462932	0.158918	Capg
Sdf4	1.11498	1.27376	0.158786	Sdf4
Wdr4	0	0.158632	0.158632	Wdr4
Dync1h1	0.198288	0.35686	0.158572	Dync1h1
Commd4	0.614689	0.773245	0.158556	Commd4
Prim2	0	0.158377	0.158377	Prim2
Gm29417	0.0731294	0.231425	0.158296	Gm29417
Zfp768	0.199648	0.357937	0.158289	Zfp768
Tle3	0.237074	0.395315	0.158241	Tle3
Rpl31	2.48908	2.64727	0.158193	Rpl31
Zbtb24	0.0991369	0.25712	0.157983	Zbtb24
Adprh	0.87278	1.03074	0.157961	Adprh
Phc2	0.149081	0.306959	0.157878	Phc2
Gskip	0.165362	0.323189	0.157828	Gskip
Gba	0.336051	0.493786	0.157735	Gba
Sdccag3	0.352295	0.509981	0.157685	Sdccag3
Dcxr	0.735878	0.89347	0.157592	Dcxr
Psd	0.065462	0.22272	0.157258	Psd
Sall2	0.060533	0.217431	0.156898	Sall2
Lefty1	0.318018	0.474874	0.156856	Lefty1
Topors	0.308365	0.465131	0.156765	Topors
Rad23a	0.523304	0.680059	0.156755	Rad23a
Arl5b	0.0333231	0.189404	0.156081	Arl5b
Git1	0	0.156038	0.156038	Git1
Paqr7	0.392107	0.548126	0.156019	Paqr7
Mboat7	0.28752	0.443531	0.156012	Mboat7
Mepce	0.0570214	0.213026	0.156004	Mepce
Il18	0.390877	0.546868	0.155991	Il18
Hspb2	0	0.155904	0.155904	Hspb2
Dbn1	0	0.155904	0.155904	Dbn1
Egflam	0	0.155904	0.155904	Egflam
2700046A07Rik	0	0.155904	0.155904	2700046A07Rik
Ggt7	0	0.155904	0.155904	Ggt7
Samd10	0	0.155904	0.155904	Samd10
Ppp1r3f	0	0.155904	0.155904	Ppp1r3f
Bgn	0	0.155904	0.155904	Bgn
Gm36823	0	0.155904	0.155904	Gm36823
Arhgap29	0	0.155904	0.155904	Arhgap29
Gm45051	0	0.155904	0.155904	Gm45051
Ifitm1	0	0.155904	0.155904	Ifitm1
Kcnk1	0	0.155904	0.155904	Kcnk1
Bmp4	0	0.155904	0.155904	Bmp4
Ythdf3	0.181349	0.337197	0.155847	Ythdf3
Bcor	0.183102	0.338658	0.155556	Bcor
Fgfbp3	0.0769543	0.232484	0.155529	Fgfbp3
Usp3	0.15429	0.30967	0.15538	Usp3
Psd3	0.0301309	0.18547	0.155339	Psd3
Eef1g	1.44414	1.59944	0.155302	Eef1g
Rbbp9	0.0858984	0.241032	0.155133	Rbbp9
Pcnx3	0.0339678	0.189077	0.15511	Pcnx3
Edc3	0.0758142	0.230738	0.154924	Edc3
Tpcn2	0	0.154661	0.154661	Tpcn2
Cript	0.560101	0.714699	0.154598	Cript
Cntrl	0.316565	0.470981	0.154416	Cntrl
Dgcr14	0.0592313	0.21362	0.154388	Dgcr14
Ints11	0.0525869	0.206928	0.154341	Ints11
Dcaf6	0.080237	0.234436	0.154199	Dcaf6
Ubqln2	0.158281	0.312437	0.154156	Ubqln2
Zfp810	0.121278	0.275335	0.154057	Zfp810
Dcaf12	0.346917	0.500739	0.153821	Dcaf12
Fmnl3	0.432473	0.586268	0.153795	Fmnl3
Cd27	0.189263	0.343021	0.153758	Cd27
Hdac5	0.393926	0.547557	0.153631	Hdac5
Rhno1	0.115652	0.26922	0.153568	Rhno1
Chsy1	0.160394	0.313909	0.153515	Chsy1
Fam173b	0.155674	0.309031	0.153357	Fam173b
Anxa4	0.159928	0.313276	0.153348	Anxa4
Glrx5	0.638463	0.791746	0.153283	Glrx5
Acaa1a	0.513113	0.666355	0.153242	Acaa1a
Tagln2	0.276916	0.430102	0.153186	Tagln2
Scamp5	0.114457	0.267573	0.153116	Scamp5
Skp2	0.0444557	0.197524	0.153069	Skp2
Ccdc137	0.0346277	0.187581	0.152953	Ccdc137
Rpl18	2.40725	2.56005	0.152797	Rpl18
P4hb	0.555633	0.708105	0.152472	P4hb
Gm45871	0.0611565	0.213561	0.152405	Gm45871
Sertad3	0.0343641	0.186612	0.152248	Sertad3
Dennd1c	0.351297	0.503398	0.1521	Dennd1c
Spryd4	0	0.15206	0.15206	Spryd4
Pim1	0.0150047	0.167034	0.15203	Pim1
Cck	0.105954	0.257858	0.151904	Cck
Stau1	0.275619	0.427518	0.151899	Stau1
Slmap	0.526063	0.677875	0.151812	Slmap
Bcorl1	0.0242492	0.176027	0.151778	Bcorl1
Clns1a	0.439474	0.590965	0.151491	Clns1a
Ptbp3	0.633247	0.784695	0.151447	Ptbp3
Poldip3	0.321372	0.47272	0.151348	Poldip3
Tprn	0	0.151333	0.151333	Tprn
Chuk	0.24935	0.400459	0.151109	Chuk
Dmxl1	0.0421866	0.193182	0.150995	Dmxl1
Rps6kc1	0.214852	0.365703	0.150851	Rps6kc1
Senp5	0.0671983	0.218024	0.150826	Senp5
4632415L05Rik	0.0485454	0.199361	0.150816	4632415L05Rik
Gnptg	0.282811	0.433596	0.150785	Gnptg
Impa1	0.361561	0.512268	0.150707	Impa1
Foxj3	0.172523	0.323216	0.150693	Foxj3
Srebf1	0.0965991	0.247281	0.150682	Srebf1
E130311K13Rik	0.128132	0.278748	0.150616	E130311K13Rik
Ccdc84	0.0275872	0.178172	0.150585	Ccdc84
Pfn1	2.64937	2.79983	0.150463	Pfn1
Ppp4r2	0.090314	0.240773	0.150459	Ppp4r2
Eif4enif1	0	0.150351	0.150351	Eif4enif1
Bicd1	0.0374022	0.187738	0.150336	Bicd1
Ubap2	0.0512199	0.201216	0.149996	Ubap2
Rnf180	0.290679	0.440586	0.149908	Rnf180
Apobec1	0.24522	0.394917	0.149697	Apobec1
Slc4a2	0.17533	0.324833	0.149504	Slc4a2
A430046D13Rik	0.0242492	0.173696	0.149447	A430046D13Rik
Rab21	0.050801	0.200163	0.149362	Rab21
Rrp7a	0.476591	0.625769	0.149178	Rrp7a
Aldh4a1	0.0354782	0.184544	0.149066	Aldh4a1
Aldh3b1	0.152993	0.302013	0.149019	Aldh3b1
Tpm2	0	0.148986	0.148986	Tpm2
Zfp148	0.349668	0.498645	0.148978	Zfp148
Faap24	0.0876279	0.236488	0.148861	Faap24
Sla	0.645716	0.794468	0.148752	Sla
Dlc1	0.0528441	0.201568	0.148724	Dlc1
Ube2z	0.13889	0.287606	0.148716	Ube2z
Paxx	0.0713062	0.219983	0.148677	Paxx
Ints14	0.124092	0.272769	0.148676	Ints14
Nfyb	0.102364	0.250803	0.14844	Nfyb
B3galnt2	0	0.148433	0.148433	B3galnt2
Tfeb	0.126269	0.274581	0.148312	Tfeb
Mfsd1	0.388069	0.536234	0.148165	Mfsd1
Zfp110	0.0554604	0.203514	0.148054	Zfp110
Slfn2	0.172156	0.320198	0.148042	Slfn2
Impact	0.194393	0.342326	0.147933	Impact
Rbm47	0.19418	0.342083	0.147903	Rbm47
Dkk3	0.0769907	0.224632	0.147642	Dkk3
Shkbp1	0.232728	0.380315	0.147587	Shkbp1
Pbx3	0.0546106	0.202157	0.147547	Pbx3
Spata13	0.430631	0.578132	0.147501	Spata13
Il15	0.0483193	0.195803	0.147484	Il15
Mplkip	0.231816	0.379274	0.147458	Mplkip
Ccdc88b	0.447312	0.594704	0.147393	Ccdc88b
Kremen1	0.0559673	0.203216	0.147249	Kremen1
Mrpl34	0.382959	0.530178	0.147219	Mrpl34
Lipe	0.0808538	0.228005	0.147151	Lipe
Map3k14	0.237373	0.384506	0.147133	Map3k14
Rab11fip5	0.122787	0.269872	0.147085	Rab11fip5
Med16	0.0276781	0.174756	0.147078	Med16
Fut8	0.0829617	0.229987	0.147025	Fut8
Lsm5	0.461478	0.608486	0.147007	Lsm5
Ywhag	0.252632	0.399596	0.146964	Ywhag
1700086O06Rik	0.0409005	0.187738	0.146838	1700086O06Rik
Olfml3	2.92518	3.07182	0.146638	Olfml3
Bub3	0.777007	0.92364	0.146632	Bub3
Gm4950	0	0.146626	0.146626	Gm4950
Kbtbd2	0.154133	0.300743	0.14661	Kbtbd2
Mark3	0.17033	0.316918	0.146589	Mark3
Lztr1	0.0517191	0.198263	0.146543	Lztr1
Orc3	0.117987	0.26448	0.146492	Orc3
Zeb2os	1.2756	1.42202	0.146427	Zeb2os
Bin1	2.20279	2.34893	0.146133	Bin1
Bola2	0.473899	0.619814	0.145915	Bola2
Il2rg	0	0.145858	0.145858	Il2rg
Il7r	0.212299	0.358113	0.145814	Il7r
Mdm2	0.211787	0.357555	0.145768	Mdm2
Srp9	0.962294	1.10793	0.145632	Srp9
Guk1	0.297974	0.443561	0.145587	Guk1
Car2	0.312478	0.458	0.145522	Car2
Atp6v0e2	0.0824427	0.227945	0.145502	Atp6v0e2
Mob3a	0.111217	0.256643	0.145425	Mob3a
D030056L22Rik	0.0964968	0.241911	0.145414	D030056L22Rik
E130307A14Rik	0.06399	0.20938	0.14539	E130307A14Rik
Tmem159	0.276054	0.421427	0.145373	Tmem159
Elmo2	0.0635311	0.208859	0.145328	Elmo2
Sorl1	0.136957	0.282258	0.145301	Sorl1
Slc46a3	0.352731	0.498004	0.145273	Slc46a3
Snx8	0.127507	0.272746	0.145238	Snx8
Ociad2	0.0814384	0.226493	0.145055	Ociad2
Pmepa1	1.09621	1.24104	0.144835	Pmepa1
Rpl22	1.9422	2.08702	0.144817	Rpl22
Nfyc	0.0922012	0.237016	0.144814	Nfyc
Fam189b	0	0.144809	0.144809	Fam189b
Gm26520	0.120732	0.26546	0.144729	Gm26520
Zdhhc12	0.277949	0.4226	0.144651	Zdhhc12
Mecp2	0.12577	0.270302	0.144532	Mecp2
Uxs1	0.149999	0.294413	0.144415	Uxs1
Sgsm3	0.0859565	0.23037	0.144414	Sgsm3
Tmem71	0	0.144238	0.144238	Tmem71
Ltbr	0.217493	0.361714	0.144221	Ltbr
Tmem120b	0.0339678	0.178172	0.144204	Tmem120b
Wdr34	0.115805	0.259529	0.143724	Wdr34
Cd151	0.577955	0.72157	0.143614	Cd151
Lrch1	0.265321	0.408916	0.143594	Lrch1
Was	0.61175	0.75533	0.14358	Was
Ajuba	0.0346277	0.178172	0.143544	Ajuba
Mfng	0.605635	0.749151	0.143516	Mfng
Pcif1	0.361291	0.504728	0.143438	Pcif1
Zfp119a	0.0242492	0.167607	0.143358	Zfp119a
Umad1	0.0678921	0.211179	0.143287	Umad1
Rps16	2.83628	2.97955	0.143272	Rps16
Ipcef1	0.0445427	0.187738	0.143196	Ipcef1
D17Wsu92e	0.145448	0.2884	0.142952	D17Wsu92e
Pde3b	0.734408	0.877316	0.142908	Pde3b
Ube2e1	0.675802	0.818702	0.1429	Ube2e1
Dctn5	0.372497	0.515391	0.142894	Dctn5
Pdhx	0.193311	0.336111	0.1428	Pdhx
Cyb5b	0.145473	0.288251	0.142778	Cyb5b
Csnk2a1	0.686146	0.828852	0.142706	Csnk2a1
Mrps28	0.137904	0.280601	0.142698	Mrps28
Nat6	0.105254	0.247621	0.142367	Nat6
Tcf4	0.858499	1.00069	0.14219	Tcf4
Tmcc1	0.241695	0.383788	0.142092	Tmcc1
Wdr92	0.130243	0.272322	0.142079	Wdr92
Ppp6r1	0.0859281	0.227945	0.142017	Ppp6r1
Ppt1	1.37944	1.52145	0.142011	Ppt1
Liph	0.0980703	0.240024	0.141954	Liph
Syp	0.0860679	0.227945	0.141877	Syp
Lypla2	0.247382	0.389241	0.141859	Lypla2
Trim28	0.245794	0.387649	0.141854	Trim28
Tceanc2	0.109063	0.250908	0.141845	Tceanc2
Ifnar1	0.400251	0.542085	0.141835	Ifnar1
Cyb561d1	0.0858775	0.227674	0.141796	Cyb561d1
Ddit3	0.258234	0.399985	0.14175	Ddit3
Numb	0.547933	0.689557	0.141624	Numb
Nup62	0.0545982	0.196065	0.141467	Nup62
Ly6a	0.0498012	0.191138	0.141337	Ly6a
Micu1	0.296399	0.437713	0.141314	Micu1
Trpt1	0.0224363	0.163699	0.141263	Trpt1
Pvr	0.0369209	0.178172	0.141251	Pvr
Pds5b	0.0488882	0.190045	0.141157	Pds5b
Mtfr1	0.0276196	0.168771	0.141151	Mtfr1
Thoc2	0.438597	0.579729	0.141132	Thoc2
Sema6d	0.0148494	0.155904	0.141054	Sema6d
Rps8	2.76735	2.90839	0.141036	Rps8
Pank4	0.0769907	0.217976	0.140985	Pank4
Ndufs2	0.676697	0.817579	0.140882	Ndufs2
Eif2b5	0.145313	0.285814	0.140501	Eif2b5
Tmcc3	1.15505	1.2955	0.140448	Tmcc3
Bcap29	0.536167	0.676514	0.140347	Bcap29
Ncald	0	0.140338	0.140338	Ncald
Smpd1	0.274993	0.415327	0.140334	Smpd1
Tmc4	0	0.140324	0.140324	Tmc4
Cox5b	1.39079	1.53093	0.140139	Cox5b
Eaf1	0.115978	0.256079	0.140101	Eaf1
Exd2	0.0549276	0.194958	0.140031	Exd2
Fkbp15	0.480485	0.620512	0.140027	Fkbp15
Nid2	0.11958	0.259559	0.139979	Nid2
Tcn2	1.35079	1.49073	0.139939	Tcn2
Tank	0.176304	0.316184	0.13988	Tank
Arhgap45	1.66251	1.80236	0.139855	Arhgap45
Rnf169	0.0840466	0.223874	0.139828	Rnf169
Ostf1	1.39671	1.53652	0.139808	Ostf1
Ddx28	0.0639666	0.203766	0.1398	Ddx28
Tmem127	0.0193256	0.158979	0.139653	Tmem127
Pin4	0.421117	0.560737	0.13962	Pin4
Wrap73	0.0814982	0.2211	0.139602	Wrap73
Acy1	0.079985	0.219574	0.139589	Acy1
Ccdc124	0.376292	0.51585	0.139559	Ccdc124
Eif1b	0.926099	1.06563	0.139529	Eif1b
Slc35a5	0.34735	0.486751	0.139402	Slc35a5
Cggbp1	0.502501	0.641729	0.139228	Cggbp1
Rnf145	0.189184	0.328242	0.139058	Rnf145
1110020A21Rik	0	0.13901	0.13901	1110020A21Rik
Eif5a	1.48224	1.62121	0.138975	Eif5a
Isg15	0.0360607	0.174986	0.138925	Isg15
Zfp763	0.0224363	0.161337	0.138901	Zfp763
Gpx1	1.49504	1.63376	0.138723	Gpx1
Cdk20	0	0.138671	0.138671	Cdk20
Mrpl54	0.455225	0.593889	0.138665	Mrpl54
Scai	0.0369209	0.175563	0.138642	Scai
mt-Atp6	4.17472	4.31315	0.138435	mt-Atp6
Trim8	0.575733	0.714059	0.138325	Trim8
Atg12	0.100289	0.238583	0.138294	Atg12
Pomt1	0	0.138265	0.138265	Pomt1
Otud1	0.138951	0.27713	0.138179	Otud1
Ndst1	0	0.138062	0.138062	Ndst1
Asns	0.0498012	0.187738	0.137937	Asns
Ext2	0.354323	0.492242	0.13792	Ext2
Serinc1	1.22273	1.36064	0.137906	Serinc1
Rpusd3	0	0.137879	0.137879	Rpusd3
Pcdhb14	0	0.137879	0.137879	Pcdhb14
Rrp9	0.0951356	0.233005	0.137869	Rrp9
Usp10	0.155304	0.293164	0.13786	Usp10
Klf16	0	0.137757	0.137757	Klf16
Etv3	0.177655	0.315358	0.137703	Etv3
Cfap97	0.179178	0.316487	0.137308	Cfap97
Eapp	0.405324	0.542612	0.137288	Eapp
Mtif2	0.153516	0.290781	0.137265	Mtif2
Zfp385a	0.411017	0.54812	0.137103	Zfp385a
Foxo3	0.0451554	0.182237	0.137081	Foxo3
Pebp1	1.1435	1.28055	0.137058	Pebp1
Bloc1s6	0.154388	0.291429	0.137042	Bloc1s6
Rps3a1	2.88913	3.0261	0.136972	Rps3a1
March6	0.266943	0.403907	0.136965	March6
Car8	0	0.136903	0.136903	Car8
Acot9	0.0829956	0.219617	0.136621	Acot9
Epas1	0.0193256	0.155904	0.136578	Epas1
Gpm6b	0.555295	0.691526	0.136232	Gpm6b
Lca5l	0.14286	0.27893	0.13607	Lca5l
Cpsf7	0.230799	0.366851	0.136051	Cpsf7
Eml4	0.612653	0.748642	0.135989	Eml4
Thap1	0	0.135981	0.135981	Thap1
Gm20696	0	0.135963	0.135963	Gm20696
Pspc1	0.0898499	0.225767	0.135917	Pspc1
Gm29666	0	0.135863	0.135863	Gm29666
Amotl1	0.0518892	0.187738	0.135849	Amotl1
Gpx4	1.72229	1.8581	0.135808	Gpx4
Mrpl11	0.328369	0.464113	0.135744	Mrpl11
Traf5	0.128679	0.264342	0.135663	Traf5
Sesn1	0.367901	0.503487	0.135586	Sesn1
Ctdsp1	0.206684	0.342254	0.135569	Ctdsp1
Qrich1	0.41289	0.548315	0.135425	Qrich1
Suv39h1	0	0.135399	0.135399	Suv39h1
B4galnt1	0.320071	0.455359	0.135288	B4galnt1
Arhgdia	1.52127	1.6565	0.135232	Arhgdia
Mrpl49	0.191216	0.326437	0.135221	Mrpl49
Tmem201	0.0217679	0.156895	0.135127	Tmem201
Mrps9	0.33598	0.471087	0.135108	Mrps9
Txndc15	0.773434	0.908504	0.135071	Txndc15
Sdhaf1	0.206396	0.341425	0.135029	Sdhaf1
Kiz	0	0.134985	0.134985	Kiz
Pxn	0.516524	0.651489	0.134965	Pxn
Cpsf6	0.451375	0.586237	0.134862	Cpsf6
Ccni	0.861409	0.996233	0.134824	Ccni
Znhit3	0.157606	0.292414	0.134808	Znhit3
Tfdp2	0.0633342	0.197999	0.134665	Tfdp2
Zfp597	0.0934611	0.227945	0.134484	Zfp597
Ryk	0	0.134357	0.134357	Ryk
Fem1b	0.0293565	0.163709	0.134352	Fem1b
Sec22a	0.100723	0.235064	0.134341	Sec22a
Amer1	0.0360607	0.170399	0.134338	Amer1
Champ1	0.121345	0.255672	0.134327	Champ1
Kctd3	0.0150047	0.149304	0.1343	Kctd3
Yipf3	0.352431	0.486473	0.134042	Yipf3
Atxn10	0.628841	0.762816	0.133975	Atxn10
Ccdc77	0.0597992	0.19372	0.133921	Ccdc77
Pik3cb	0.136988	0.270897	0.133909	Pik3cb
Mrpl19	0.15061	0.284505	0.133895	Mrpl19
Wdfy2	0.199216	0.333075	0.133858	Wdfy2
3830406C13Rik	0.396095	0.529602	0.133507	3830406C13Rik
Vsnl1	0.0543216	0.187738	0.133417	Vsnl1
Tbrg4	0.0198038	0.153162	0.133358	Tbrg4
Atf7ip	0.31577	0.449072	0.133302	Atf7ip
Erp44	0.57624	0.709535	0.133295	Erp44
Srsf1	0.257021	0.390288	0.133267	Srsf1
Tceal1	0.325029	0.458198	0.133169	Tceal1
Ppfia4	1.3771	1.51024	0.133139	Ppfia4
Tmem192	0.246462	0.379557	0.133095	Tmem192
Rnpc3	0.214999	0.348062	0.133063	Rnpc3
Hspa8	2.06285	2.19592	0.133062	Hspa8
Atp1a3	0.247131	0.380119	0.132988	Atp1a3
Tshz2	0	0.132979	0.132979	Tshz2
Scrg1	0.265353	0.398238	0.132884	Scrg1
Dpm2	0.4619	0.59473	0.13283	Dpm2
Nrn1	0.0830173	0.215731	0.132714	Nrn1
Slc7a6os	0.176942	0.309653	0.132712	Slc7a6os
Mga	0.257618	0.390288	0.13267	Mga
Miip	0.182137	0.314781	0.132644	Miip
Fuca1	1.05506	1.1877	0.132643	Fuca1
Jak3	0	0.132457	0.132457	Jak3
Cr1l	0.621206	0.753575	0.132368	Cr1l
Naf1	0.0800611	0.212378	0.132317	Naf1
Dhodh	0	0.132287	0.132287	Dhodh
Sall1	0.888027	1.02028	0.132249	Sall1
Mbtps1	0.241393	0.373571	0.132179	Mbtps1
Wdr54	0.0237259	0.155904	0.132178	Wdr54
Sys1	0.525223	0.657373	0.13215	Sys1
Agap1	0.0237642	0.155904	0.13214	Agap1
Wdr81	0.129823	0.261913	0.132091	Wdr81
Dhx37	0	0.132069	0.132069	Dhx37
Snhg11	0.0961385	0.227945	0.131807	Snhg11
Dpysl2	1.04488	1.17668	0.131797	Dpysl2
Zfhx2	0	0.131706	0.131706	Zfhx2
Plpp2	0.0414185	0.173055	0.131636	Plpp2
Papss1	0.980355	1.11198	0.131626	Papss1
Mical3	0.0716437	0.20324	0.131596	Mical3
Bmpr2	0.248866	0.38033	0.131464	Bmpr2
Mrpl27	0.311739	0.442821	0.131081	Mrpl27
Arhgef9	0.0566628	0.187738	0.131076	Arhgef9
Ank3	0.0566628	0.187738	0.131076	Ank3
P3h3	0.0606357	0.191644	0.131009	P3h3
Ubald1	0.252503	0.383437	0.130934	Ubald1
Efhd1	0.0569428	0.187738	0.130796	Efhd1
Xpr1	0.237392	0.368074	0.130682	Xpr1
Rpl19	2.73303	2.86368	0.130658	Rpl19
Snap47	0.0988689	0.229458	0.130589	Snap47
Mthfsd	0.0293686	0.159942	0.130574	Mthfsd
Cnpy3	0.925209	1.05578	0.130572	Cnpy3
Usp35	0.205258	0.335787	0.130529	Usp35
Prmt5	0.0745227	0.204943	0.13042	Prmt5
Morc3	0.532929	0.66332	0.130391	Morc3
Plekhb2	0.207573	0.337919	0.130345	Plekhb2
Trip12	0.226659	0.356997	0.130338	Trip12
Abcd4	0.0505012	0.180806	0.130305	Abcd4
Usp24	0.106741	0.236989	0.130248	Usp24
Mapre3	0.0433539	0.173585	0.130231	Mapre3
Setd5	0.538265	0.668468	0.130203	Setd5
Rab27a	0.121021	0.251183	0.130163	Rab27a
Zbtb37	0	0.130109	0.130109	Zbtb37
Txndc5	0.317085	0.447177	0.130092	Txndc5
Slc11a2	0.0412591	0.171302	0.130043	Slc11a2
Clpb	0.101979	0.232008	0.13003	Clpb
Yae1d1	0.434727	0.564738	0.130011	Yae1d1
Tmem167	0.633511	0.763475	0.129964	Tmem167
Coq3	0.131996	0.261955	0.129959	Coq3
Gnpnat1	0.141609	0.271511	0.129902	Gnpnat1
Rpl30	2.38439	2.51417	0.12978	Rpl30
Slc36a1	0.132407	0.261929	0.129522	Slc36a1
Ppil2	0.567897	0.697292	0.129395	Ppil2
Taf8	0.0518892	0.181254	0.129364	Taf8
Nuak1	0.371217	0.500543	0.129326	Nuak1
Atg16l1	0.0704053	0.199699	0.129293	Atg16l1
Fzr1	0.244583	0.373837	0.129255	Fzr1
Sh2d3c	0.0775051	0.206731	0.129226	Sh2d3c
Spata5	0.0651677	0.194389	0.129221	Spata5
Hnrnpul1	0.697353	0.826507	0.129154	Hnrnpul1
Tomm6	0.367043	0.496091	0.129048	Tomm6
Miga1	0.043375	0.172395	0.12902	Miga1
Rasa3	0.433513	0.562435	0.128922	Rasa3
Klhl9	0.417632	0.546548	0.128916	Klhl9
Stard9	0.155309	0.284135	0.128825	Stard9
Bckdk	0.417203	0.545999	0.128796	Bckdk
Ap1g1	0.130552	0.259226	0.128673	Ap1g1
Zfp821	0.106621	0.235201	0.12858	Zfp821
Mknk2	0.113986	0.242547	0.128561	Mknk2
Ankrd10	0.287523	0.41607	0.128547	Ankrd10
Gp9	0.785884	0.914416	0.128533	Gp9
Oser1	0.337622	0.466053	0.128432	Oser1
Gimap5	0	0.128396	0.128396	Gimap5
Mcfd2	0.755004	0.883264	0.12826	Mcfd2
Hmgn5	0.0276781	0.155904	0.128226	Hmgn5
Ywhab	0.826851	0.954888	0.128037	Ywhab
Poglut1	0.233561	0.361537	0.127976	Poglut1
Dvl2	0.0793769	0.207338	0.127961	Dvl2
Dctn6	0.281872	0.409785	0.127913	Dctn6
Eif4g2	1.16313	1.29099	0.127865	Eif4g2
Pgap1	0.0600403	0.187738	0.127698	Pgap1
Mpc2	0.776676	0.904346	0.12767	Mpc2
Pwp1	0.0619615	0.18955	0.127589	Pwp1
Stt3b	0.218863	0.346414	0.12755	Stt3b
Frs2	0.068853	0.196357	0.127504	Frs2
Asb13	0.262905	0.390337	0.127432	Asb13
Slc25a38	0.103001	0.2304	0.127399	Slc25a38
Snx16	0.0951511	0.222522	0.127371	Snx16
Sephs1	0.171189	0.2985	0.12731	Sephs1
Ppp2r2c	0	0.126981	0.126981	Ppp2r2c
Ifitm2	0.0784809	0.205132	0.126651	Ifitm2
Haghl	0.486498	0.613147	0.126649	Haghl
Slc6a17	0.0516831	0.178172	0.126489	Slc6a17
Aars	0.474986	0.601414	0.126428	Aars
Ubr5	0.159604	0.28599	0.126386	Ubr5
Cd300a	0.952823	1.0792	0.126379	Cd300a
Smarca4	0.249648	0.375998	0.12635	Smarca4
Zfp605	0	0.126192	0.126192	Zfp605
Tmem5	0.319638	0.445782	0.126144	Tmem5
Psmc1	0.454537	0.580617	0.12608	Psmc1
Exosc3	0.0971719	0.223142	0.12597	Exosc3
Rbm7	0.627607	0.753299	0.125692	Rbm7
Taok1	0.367851	0.493488	0.125638	Taok1
Rps12-ps3	1.4933	1.61892	0.125618	Rps12-ps3
Eif4ebp2	0.222163	0.347777	0.125614	Eif4ebp2
Man2b1	1.99649	2.12202	0.125524	Man2b1
Cyth3	0.123642	0.249159	0.125517	Cyth3
Nudt9	0.632526	0.757991	0.125465	Nudt9
Ssr4	1.69088	1.81628	0.1254	Ssr4
Rhot2	0.03621	0.161566	0.125356	Rhot2
Brd9	0.356106	0.481459	0.125353	Brd9
Mxra7	0	0.125289	0.125289	Mxra7
Zfpm1	0.06626	0.191367	0.125107	Zfpm1
Galk1	0.220174	0.345277	0.125102	Galk1
Ankrd13d	0.0281348	0.153118	0.124983	Ankrd13d
Surf1	0.527239	0.652111	0.124872	Surf1
Faim	0.425306	0.550176	0.124871	Faim
Cbr4	0.263589	0.388364	0.124775	Cbr4
Ssh3	0	0.124706	0.124706	Ssh3
Trim41	0.16891	0.293584	0.124674	Trim41
Lnpk	0.126202	0.250712	0.12451	Lnpk
Dnmt1	0.0138397	0.13825	0.12441	Dnmt1
Hspb1	0	0.124408	0.124408	Hspb1
Engase	0.148127	0.272449	0.124321	Engase
Hmgn1	0.820444	0.944736	0.124292	Hmgn1
Mul1	0.194517	0.3188	0.124283	Mul1
Cdc5l	0.189729	0.313984	0.124255	Cdc5l
Dnaja2	0.398248	0.522487	0.124239	Dnaja2
Cdkn2aip	0.21564	0.339853	0.124213	Cdkn2aip
Clk3	0.175733	0.299945	0.124212	Clk3
Tmed9	1.57405	1.69821	0.124166	Tmed9
Zfyve26	0.156524	0.280548	0.124023	Zfyve26
Ptprg	0.0319562	0.155904	0.123948	Ptprg
Rgs4	0.0320345	0.155904	0.123869	Rgs4
Zdhhc23	0.0639665	0.187738	0.123772	Zdhhc23
Rorb	0.0639665	0.187738	0.123772	Rorb
Ccdc148	0.0639666	0.187738	0.123772	Ccdc148
Dnaic1	0.0639666	0.187738	0.123772	Dnaic1
Ccdc34	0.187121	0.310784	0.123663	Ccdc34
Slc16a4	0	0.123596	0.123596	Slc16a4
Pick1	0.0929138	0.216378	0.123464	Pick1
Sec24a	0.109712	0.233173	0.123461	Sec24a
Prmt6	0.0502593	0.173488	0.123228	Prmt6
Manba	0.123304	0.246445	0.123141	Manba
Zfp358	0.0828814	0.20592	0.123038	Zfp358
Satb1	0.061145	0.184166	0.123021	Satb1
Fdps	0.250496	0.37348	0.122984	Fdps
Ebna1bp2	0.345301	0.468256	0.122955	Ebna1bp2
Itch	0.383599	0.506482	0.122883	Itch
Synj2bp	0.148034	0.270915	0.122882	Synj2bp
Gm5426	0	0.12285	0.12285	Gm5426
Slc35b1	0.435249	0.558069	0.12282	Slc35b1
Tex30	0	0.122587	0.122587	Tex30
Ptprj	0.280036	0.402573	0.122537	Ptprj
Kif21b	0.331769	0.454232	0.122463	Kif21b
Tpra1	0.229647	0.352062	0.122415	Tpra1
Trappc3	0.597295	0.719692	0.122397	Trappc3
Pml	0	0.122387	0.122387	Pml
Mlh1	0	0.122319	0.122319	Mlh1
Enc1	0.107834	0.230053	0.12222	Enc1
Ocel1	0.111113	0.233316	0.122203	Ocel1
Ddx54	0.198136	0.320313	0.122177	Ddx54
Rpl27	0.561539	0.683712	0.122173	Rpl27
Ddx49	0.213663	0.335802	0.122139	Ddx49
Gm30025	0.0579729	0.180104	0.122131	Gm30025
Ndel1	0.190569	0.312662	0.122093	Ndel1
Blvra	0.404155	0.526187	0.122032	Blvra
Sec61a1	0.391415	0.51339	0.121975	Sec61a1
Creg1	1.68145	1.80342	0.121972	Creg1
Yipf1	0.560315	0.682268	0.121953	Yipf1
Nudt7	0.131585	0.253438	0.121853	Nudt7
Dcun1d2	0.0564316	0.17825	0.121818	Dcun1d2
Hspa13	0.233234	0.354794	0.12156	Hspa13
Kcnt2	0.0661989	0.187738	0.121539	Kcnt2
Zdhhc21	0	0.121521	0.121521	Zdhhc21
Iqgap1	0.0600181	0.181532	0.121514	Iqgap1
Rcn2	0.714928	0.836438	0.121511	Rcn2
Gnl1	0.0688546	0.19033	0.121476	Gnl1
Nrros	0.688155	0.809597	0.121441	Nrros
Elovl5	0.174816	0.296229	0.121413	Elovl5
Tmem191c	0.0247804	0.146133	0.121352	Tmem191c
Dync1li2	0.238301	0.359593	0.121291	Dync1li2
Zbtb8b	0.0755549	0.196767	0.121212	Zbtb8b
C730034F03Rik	0.0235643	0.144652	0.121088	C730034F03Rik
Snrk	0.574936	0.69598	0.121044	Snrk
Pqlc2	0.0568246	0.17782	0.120996	Pqlc2
Rac1	1.49872	1.61966	0.120941	Rac1
Slc25a19	0.188816	0.309747	0.120931	Slc25a19
Ddah2	0.563999	0.68491	0.120912	Ddah2
Fbxo28	0.0978456	0.21875	0.120904	Fbxo28
Fgfr1op2	0.554542	0.675266	0.120725	Fgfr1op2
Bcl2a1b	1.25818	1.3788	0.120627	Bcl2a1b
Limd2	1.51085	1.63146	0.120606	Limd2
Fcgr1	1.51443	1.63498	0.120551	Fcgr1
Orai1	0.94034	1.06082	0.120477	Orai1
Tctex1d2	0.196244	0.316658	0.120414	Tctex1d2
Clec4a2	0.638257	0.758526	0.120268	Clec4a2
Ccdc43	0	0.120015	0.120015	Ccdc43
Gal3st4	0.0634827	0.1834	0.119917	Gal3st4
St6gal1	0.0634065	0.183275	0.119868	St6gal1
Nagpa	0.632721	0.752576	0.119855	Nagpa
Trmt6	0.308891	0.428728	0.119837	Trmt6
Zfp292	0.431068	0.550806	0.119738	Zfp292
Gmps	0.331115	0.450844	0.119729	Gmps
Dusp12	0.132362	0.252068	0.119706	Dusp12
Hivep2	0.0283109	0.147942	0.119631	Hivep2
Rora	0.0681634	0.187738	0.119575	Rora
Fbxl16	0.0682031	0.187738	0.119535	Fbxl16
Rpp14	0.270338	0.389808	0.11947	Rpp14
Pop7	0.239541	0.359004	0.119463	Pop7
Fam214b	0.0718396	0.19124	0.119401	Fam214b
Setd4	0.0269613	0.146275	0.119314	Setd4
Lin7c	0.489318	0.608619	0.119301	Lin7c
Cdo1	0	0.119294	0.119294	Cdo1
Nedd4l	0	0.119294	0.119294	Nedd4l
Rbbp5	0	0.119294	0.119294	Rbbp5
Zhx3	0	0.119294	0.119294	Zhx3
Wdr31	0	0.119294	0.119294	Wdr31
Vat1	0.0452589	0.16446	0.119201	Vat1
AU041133	0.0511966	0.170336	0.11914	AU041133
Zyx	0.26422	0.383322	0.119102	Zyx
Rasgrp4	0	0.119009	0.119009	Rasgrp4
Mllt6	0.0276196	0.14658	0.11896	Mllt6
Ubtd1	0.496316	0.615242	0.118926	Ubtd1
Lsm4	0.616648	0.735557	0.118909	Lsm4
Bax	1.00064	1.11953	0.118889	Bax
Tomm7	1.21712	1.33597	0.118855	Tomm7
Pcnx	0.0346277	0.15346	0.118832	Pcnx
Pi4kb	0.176231	0.295058	0.118827	Pi4kb
Zfp777	0.113382	0.232151	0.118769	Zfp777
H2-T23	0.667906	0.786624	0.118718	H2-T23
Ptpru	0.0527729	0.171341	0.118568	Ptpru
Tmem240	0.0193256	0.137879	0.118554	Tmem240
Gm26853	0	0.118548	0.118548	Gm26853
Gm26699	0.561261	0.679727	0.118465	Gm26699
Cotl1	1.87904	1.9975	0.118464	Cotl1
Fbxo46	0.054586	0.173009	0.118423	Fbxo46
Vps11	0.0856908	0.204026	0.118336	Vps11
Adgrl1	0.0695912	0.187738	0.118147	Adgrl1
Zfand2b	0.0159854	0.134046	0.118061	Zfand2b
Cct4	0.765269	0.883329	0.11806	Cct4
Ndufaf1	0.0847707	0.202806	0.118035	Ndufaf1
Crk	0.38186	0.499759	0.117898	Crk
Lbr	0.143546	0.261434	0.117888	Lbr
Stk16	0.229704	0.347582	0.117878	Stk16
Tfap4	0.184879	0.302685	0.117806	Tfap4
Rps10	2.44154	2.55933	0.117791	Rps10
Irf8	1.87558	1.99334	0.117754	Irf8
Zfp36	1.04377	1.16149	0.117721	Zfp36
Rpl36	2.68731	2.80502	0.117709	Rpl36
Cyb5r3	0.537701	0.655403	0.117703	Cyb5r3
Nudt4	0.462846	0.580545	0.117699	Nudt4
Pcdh1	0	0.117474	0.117474	Pcdh1
1110038F14Rik	0.316253	0.433717	0.117464	1110038F14Rik
Srl	0.0333137	0.150773	0.11746	Srl
Zgpat	0.0807574	0.198153	0.117395	Zgpat
Pigc	0.140059	0.257223	0.117164	Pigc
Ddx39	0.161684	0.278804	0.11712	Ddx39
Bri3bp	0.0573988	0.174514	0.117115	Bri3bp
Lrrcc1	0.181871	0.298984	0.117112	Lrrcc1
Recql5	0.0480286	0.164937	0.116908	Recql5
Nmnat1	0	0.116893	0.116893	Nmnat1
Dlgap4	0.424473	0.541366	0.116892	Dlgap4
Zfp354c	0.0708591	0.187738	0.116879	Zfp354c
Syngr1	1.94092	2.05778	0.116868	Syngr1
Nkiras2	0.112589	0.229383	0.116794	Nkiras2
Hgsnat	0.203651	0.320413	0.116762	Hgsnat
Sh2b1	0.221679	0.338437	0.116757	Sh2b1
Pold4	0.993102	1.10984	0.116739	Pold4
Wbp2	0.670538	0.787273	0.116735	Wbp2
Ube2g2	0.45474	0.571399	0.116659	Ube2g2
Angptl6	0	0.116659	0.116659	Angptl6
Tusc2	0.191324	0.307885	0.116562	Tusc2
Sdcbp	1.35478	1.47129	0.116511	Sdcbp
Sin3b	0.60325	0.719647	0.116398	Sin3b
Necap1	0.131047	0.247439	0.116391	Necap1
Optn	0	0.116344	0.116344	Optn
Rpl22l1	1.33686	1.4532	0.116338	Rpl22l1
Osbpl11	0.420549	0.536649	0.1161	Osbpl11
Hint1	1.30534	1.42142	0.116076	Hint1
Fam118a	0.0159854	0.132056	0.116071	Fam118a
Psmd8	0.87172	0.98774	0.116021	Psmd8
Cnih4	0.59936	0.715319	0.115959	Cnih4
Stard3	0.795462	0.911347	0.115885	Stard3
Lrrc8d	0.101109	0.216942	0.115833	Lrrc8d
Dlg1	0	0.115762	0.115762	Dlg1
Cryab	0.445092	0.560835	0.115743	Cryab
Casp7	0.0159854	0.131619	0.115633	Casp7
Vcam1	0	0.115554	0.115554	Vcam1
Gm16973	0	0.115554	0.115554	Gm16973
Dnajc30	0.303537	0.419063	0.115527	Dnajc30
Tmub2	0.239832	0.355356	0.115524	Tmub2
Rrad	0.135945	0.251352	0.115407	Rrad
Slc25a4	1.35323	1.46861	0.11538	Slc25a4
Atp5g2	1.5238	1.63917	0.11537	Atp5g2
Nucb2	0.199656	0.315018	0.115361	Nucb2
Klf7	0.46109	0.576354	0.115264	Klf7
Pdp2	0.0369209	0.152098	0.115177	Pdp2
Vps4a	0.242811	0.357981	0.11517	Vps4a
Ccser2	0.117326	0.232488	0.115162	Ccser2
Adi1	0.0970258	0.212022	0.114996	Adi1
Spata2	0	0.114953	0.114953	Spata2
Polr3d	0.0779022	0.19278	0.114877	Polr3d
Mbd3	0.327597	0.442419	0.114822	Mbd3
Adam9	0.0763615	0.19115	0.114789	Adam9
Plekha2	0.488516	0.603204	0.114688	Plekha2
Coro1a	1.80955	1.9241	0.114551	Coro1a
Cd83	0.471527	0.585894	0.114368	Cd83
Tbcel	0.111272	0.225612	0.11434	Tbcel
Suz12	0.047021	0.161344	0.114323	Suz12
Mis18a	0.120949	0.235201	0.114253	Mis18a
H2-Oa	0.522309	0.636491	0.114181	H2-Oa
Wdr38	0	0.114139	0.114139	Wdr38
Smim3	0.288778	0.402883	0.114104	Smim3
Cep95	0	0.113806	0.113806	Cep95
Disc1	0.122652	0.23645	0.113797	Disc1
Abca1	0.65223	0.766	0.11377	Abca1
Mta1	0.0969553	0.210716	0.11376	Mta1
Ywhaz	0.635489	0.74922	0.113731	Ywhaz
Pik3ip1	0.120091	0.23376	0.113669	Pik3ip1
Anxa5	0.550708	0.664357	0.113648	Anxa5
Sucla2	0.389426	0.50288	0.113453	Sucla2
Med10	0.420342	0.533782	0.11344	Med10
Stt3a	0.577717	0.691136	0.113419	Stt3a
Ggta1	0.374383	0.487783	0.113399	Ggta1
Cds1	0.0269613	0.140332	0.113371	Cds1
Atn1	0.0685399	0.181845	0.113305	Atn1
Zfp212	0.15169	0.264993	0.113304	Zfp212
March1	0.632816	0.746036	0.11322	March1
Sirt4	0.0275872	0.140802	0.113214	Sirt4
Ogdh	0.166244	0.279423	0.113179	Ogdh
Arhgap25	0.589586	0.702722	0.113136	Arhgap25
Tmem115	0.172826	0.285939	0.113113	Tmem115
Casp3	0.132237	0.245169	0.112931	Casp3
Eif3c	0.833686	0.946506	0.11282	Eif3c
Lpcat3	0.88153	0.994296	0.112766	Lpcat3
Cetn3	0.833002	0.945613	0.112611	Cetn3
Rps15a	2.84574	2.95829	0.112552	Rps15a
Lamp1	2.48746	2.59998	0.112516	Lamp1
Ganab	0.246377	0.358878	0.112501	Ganab
Gcn1l1	0.483213	0.595686	0.112473	Gcn1l1
Rbm38	0.0972394	0.209667	0.112428	Rbm38
Zfp866	0.0148494	0.127091	0.112242	Zfp866
Ptprd	0	0.11223	0.11223	Ptprd
Lrrc42	0	0.11223	0.11223	Lrrc42
Cyp51	0	0.11223	0.11223	Cyp51
9130604C24Rik	0	0.11223	0.11223	9130604C24Rik
Casp2	0	0.11223	0.11223	Casp2
Asah2	0	0.11223	0.11223	Asah2
Hyal2	0.0837415	0.195857	0.112116	Hyal2
Ubxn6	0.392944	0.505044	0.1121	Ubxn6
Tsta3	0.308226	0.42018	0.111954	Tsta3
Crtc2	0.0857305	0.197444	0.111713	Crtc2
Dph3	0.239718	0.351387	0.111669	Dph3
Il3ra	0.0157436	0.127379	0.111635	Il3ra
Mrpl30	0.513659	0.625111	0.111452	Mrpl30
Pigv	0.11581	0.227098	0.111288	Pigv
Mcts2	0.0157436	0.127026	0.111282	Mcts2
St8sia4	0.0435626	0.154817	0.111254	St8sia4
Cd52	1.45568	1.56693	0.111252	Cd52
Itgb1bp1	0.207465	0.318597	0.111132	Itgb1bp1
Cdc25b	0	0.111096	0.111096	Cdc25b
Nln	0	0.110972	0.110972	Nln
Fnbp1	0.439277	0.55023	0.110953	Fnbp1
Mmaa	0.0226785	0.133604	0.110925	Mmaa
Tyw1	0.130488	0.241332	0.110844	Tyw1
Sh2b3	0.547961	0.658767	0.110807	Sh2b3
Fam213b	0.539473	0.650278	0.110806	Fam213b
Dnajc12	0.0683923	0.179136	0.110744	Dnajc12
Sec24c	0.126502	0.237227	0.110725	Sec24c
Nucb1	0.820132	0.930855	0.110723	Nucb1
Katnbl1	0.107522	0.218188	0.110667	Katnbl1
Kdm6b	0.202065	0.312716	0.110651	Kdm6b
Siva1	0.17498	0.285605	0.110625	Siva1
Pifo	0	0.110612	0.110612	Pifo
Ezr	0	0.110612	0.110612	Ezr
Tlr2	0.345994	0.456479	0.110485	Tlr2
Ccnt1	0.187391	0.297875	0.110484	Ccnt1
Pan3	0.359524	0.469994	0.110469	Pan3
Cars2	0.0906407	0.20109	0.11045	Cars2
Fbxo25	0.150435	0.260875	0.110439	Fbxo25
Zmat2	0.798376	0.908729	0.110354	Zmat2
Klf2	0.419993	0.530195	0.110202	Klf2
Emp2	0.0618178	0.171951	0.110134	Emp2
Abcf2	0.172164	0.282275	0.110112	Abcf2
Comt	1.98168	2.09172	0.110046	Comt
Krtcap2	1.22241	1.33239	0.109976	Krtcap2
Tmem97	0.0816376	0.191302	0.109664	Tmem97
Gm10138	0.259048	0.36871	0.109662	Gm10138
Fkbp5	0.0988017	0.208433	0.109631	Fkbp5
Elof1	0.371658	0.481237	0.109579	Elof1
Tm2d3	0.545833	0.655286	0.109453	Tm2d3
Rasal2	0.0783031	0.187738	0.109435	Rasal2
Pcnt	0.0855494	0.194937	0.109387	Pcnt
Polr3k	0.305278	0.4145	0.109222	Polr3k
Rpl35a	3.31607	3.42527	0.109196	Rpl35a
Rasl10b	0	0.109188	0.109188	Rasl10b
Gm13031	0	0.109188	0.109188	Gm13031
Polb	0.309029	0.418191	0.109162	Polb
Gm26532	0.0244915	0.133643	0.109152	Gm26532
Rgs10	2.95667	3.06574	0.109072	Rgs10
Sptlc1	0.126807	0.235872	0.109065	Sptlc1
Msra	0.076071	0.185086	0.109015	Msra
Jak2	0.169516	0.278492	0.108976	Jak2
Ccdc97	0.085823	0.194762	0.108939	Ccdc97
Sf1	0.372727	0.481594	0.108867	Sf1
Tubb6	0.0571888	0.166055	0.108866	Tubb6
Fam89a	0.0790987	0.187826	0.108727	Fam89a
Ngef	0	0.10867	0.10867	Ngef
Pdzd11	0.393938	0.502532	0.108594	Pdzd11
Hsd17b12	0.424904	0.533428	0.108524	Hsd17b12
Ywhaq	0.710449	0.818958	0.108509	Ywhaq
Zc3h12a	0.102196	0.210693	0.108497	Zc3h12a
Smarca2	0.261904	0.370388	0.108485	Smarca2
Klhl12	0.0795062	0.187738	0.108232	Klhl12
Rps29	4.0111	4.1192	0.108102	Rps29
Erf	0.530765	0.638738	0.107974	Erf
Hvcn1	0.724426	0.832397	0.107971	Hvcn1
Scarb2	0.858859	0.966801	0.107943	Scarb2
Rbp1	0.0798126	0.187738	0.107926	Rbp1
Fam174a	0.869687	0.977563	0.107877	Fam174a
Nr1h2	0.310715	0.418512	0.107797	Nr1h2
Gm26782	0.288806	0.396533	0.107726	Gm26782
[truncated: 11,039 more rows]

## Sheet: Mural
gene_id	Control	Treated	diff	gene
Ptgds	0.306192	3.24178	2.93559	Ptgds
Apod	0.462787	2.8464	2.38361	Apod
Igfbp2	0.184273	1.94707	1.76279	Igfbp2
Slc7a11	0	1.56727	1.56727	Slc7a11
Dcn	0.44448	1.80616	1.36168	Dcn
Spp1	0.539973	1.63043	1.09046	Spp1
Itih5	0.718342	1.65328	0.934934	Itih5
Cmbl	0.168827	1.05243	0.883604	Cmbl
Ramp2	0.0946352	0.938702	0.844067	Ramp2
Pcbp1	0.298228	1.1406	0.842369	Pcbp1
Snhg11	0.0561214	0.897727	0.841605	Snhg11
Edn3	0	0.83337	0.83337	Edn3
Slc3a2	0.755895	1.56788	0.811989	Slc3a2
Sike1	0	0.794264	0.794264	Sike1
Brk1	0.590086	1.38013	0.790042	Brk1
Dbp	1.04063	1.81993	0.779302	Dbp
Serpinf1	0.104291	0.881564	0.777272	Serpinf1
Snrpc	0.414411	1.08705	0.67264	Snrpc
Rab21	0	0.668838	0.668838	Rab21
Dscr3	0	0.664582	0.664582	Dscr3
Vim	1.8003	2.45434	0.65404	Vim
Aldh1a1	0.0823293	0.735147	0.652817	Aldh1a1
Myo18a	0.0657405	0.713264	0.647524	Myo18a
Slc6a13	0.874149	1.51609	0.64194	Slc6a13
Synpo	0.12683	0.750783	0.623952	Synpo
Tcn2	0.43827	1.05753	0.619264	Tcn2
Rpp25l	0.166819	0.784576	0.617757	Rpp25l
Actl6a	0.0567754	0.672945	0.61617	Actl6a
Bag6	0.145969	0.761513	0.615544	Bag6
Kcnab1	0.0805848	0.689845	0.60926	Kcnab1
Gabarapl1	0.576516	1.17788	0.601361	Gabarapl1
Slc30a6	0	0.596414	0.596414	Slc30a6
Cxcl12	1.2192	1.81363	0.594431	Cxcl12
Fxyd6	0	0.589853	0.589853	Fxyd6
Col1a1	0	0.586899	0.586899	Col1a1
Lims2	0.378834	0.965229	0.586394	Lims2
Zfp362	0.0403105	0.620351	0.58004	Zfp362
Sf3b5	0.378205	0.947953	0.569748	Sf3b5
Svbp	0.210329	0.770148	0.559819	Svbp
Slc1a3	0.326098	0.882184	0.556086	Slc1a3
Txlna	0	0.553347	0.553347	Txlna
Eif3m	0.508565	1.05718	0.548613	Eif3m
Ick	0.0686329	0.61473	0.546097	Ick
AW011738	0.202946	0.748552	0.545605	AW011738
Cdc26	0.48719	1.02698	0.539792	Cdc26
Nkd2	0	0.539348	0.539348	Nkd2
Tmem167	0.358891	0.895421	0.536531	Tmem167
Neat1	0.802307	1.3386	0.536293	Neat1
Gpsm1	0	0.534005	0.534005	Gpsm1
Rpl27-ps3	0.831195	1.36458	0.533387	Rpl27-ps3
Dcun1d5	0.321738	0.854669	0.532931	Dcun1d5
Arpc1b	0.625506	1.15798	0.532478	Arpc1b
Hnrnph1	0.410173	0.941167	0.530994	Hnrnph1
Eif4a1	1.3183	1.84877	0.530472	Eif4a1
Tagln	3.11009	3.63899	0.528897	Tagln
Hspa1a	0.509941	1.03565	0.52571	Hspa1a
Leng1	0.104585	0.628656	0.52407	Leng1
Wdr45b	0.274792	0.797958	0.523165	Wdr45b
Fbxo9	0.337696	0.860756	0.523061	Fbxo9
Manbal	0.362471	0.881179	0.518708	Manbal
Idh3g	0.722047	1.23604	0.513992	Idh3g
Rps12	0.120957	0.634557	0.5136	Rps12
Tcp1	0.446181	0.959359	0.513178	Tcp1
Atp6v0d1	0.282623	0.795053	0.51243	Atp6v0d1
Abhd14b	0.264305	0.775828	0.511523	Abhd14b
Hipk3	0	0.511462	0.511462	Hipk3
Mgp	2.40075	2.9108	0.510045	Mgp
Prkacb	0.439621	0.94867	0.509048	Prkacb
Capns1	1.32988	1.83605	0.50617	Capns1
Ssr3	0.664771	1.16972	0.504949	Ssr3
Gstm1	1.23772	1.74167	0.503949	Gstm1
Actr1b	0.164562	0.666343	0.501781	Actr1b
Tspo	0.817466	1.31507	0.497605	Tspo
Mrps6	0.291017	0.788617	0.4976	Mrps6
Gm10073	0.269404	0.76402	0.494616	Gm10073
Eif3i	0.371599	0.859946	0.488347	Eif3i
Hexim1	0.165888	0.652667	0.486779	Hexim1
Adipor1	0.459137	0.94258	0.483443	Adipor1
Larp1	0	0.483187	0.483187	Larp1
Urod	0.280443	0.762815	0.482373	Urod
Arvcf	0.159739	0.640826	0.481088	Arvcf
Zic4	0.917609	1.39773	0.480118	Zic4
Alg14	0.145706	0.624759	0.479052	Alg14
Cav1	0.348008	0.826954	0.478946	Cav1
Msx1	0	0.47893	0.47893	Msx1
Flna	1.41766	1.89604	0.47838	Flna
Pik3r2	0.409018	0.886993	0.477976	Pik3r2
Lamtor3	0.684838	1.16264	0.477802	Lamtor3
Uimc1	0.134466	0.611896	0.47743	Uimc1
Bmp7	0	0.475734	0.475734	Bmp7
Cct2	0.136949	0.611283	0.474334	Cct2
Pcolce	1.19574	1.66933	0.473591	Pcolce
Arhgef40	0.178819	0.649172	0.470353	Arhgef40
Rps27rt	1.51196	1.98111	0.469147	Rps27rt
Atp1b1	1.0202	1.48903	0.468822	Atp1b1
Rtraf	0.662786	1.13014	0.467353	Rtraf
Lncpint	0.214932	0.681382	0.46645	Lncpint
Hist1h1c	0.370951	0.836666	0.465715	Hist1h1c
Plec	0.180645	0.644578	0.463933	Plec
Rala	0.256338	0.719628	0.46329	Rala
Pdgfra	0	0.460339	0.460339	Pdgfra
Dcaf17	0.0651085	0.524008	0.458899	Dcaf17
B230217C12Rik	0	0.458342	0.458342	B230217C12Rik
Uvrag	0.0567754	0.515093	0.458318	Uvrag
Atp5g2	1.40413	1.86226	0.458132	Atp5g2
Lsm5	0.254541	0.711935	0.457394	Lsm5
Nkd1	0.645832	1.10181	0.455976	Nkd1
Ifi27	0.775903	1.23184	0.455935	Ifi27
Pcp4	0	0.45592	0.45592	Pcp4
Nras	0.221806	0.67649	0.454685	Nras
Mrpl30	0.692931	1.14733	0.454396	Mrpl30
Islr	0.128451	0.580412	0.451961	Islr
Kxd1	0.393618	0.844019	0.450401	Kxd1
Pcyt2	0.0686329	0.517809	0.449176	Pcyt2
Rbm15b	0.103671	0.550302	0.446631	Rbm15b
Plekhg2	0.717491	1.1637	0.446208	Plekhg2
Rpl29	1.73812	2.18371	0.445593	Rpl29
Fuz	0.153327	0.596516	0.443189	Fuz
Ccnd3	0.345104	0.786987	0.441883	Ccnd3
Tmem109	0.841509	1.28279	0.441281	Tmem109
Utp3	0.299113	0.739851	0.440738	Utp3
Nprl2	0.142138	0.58212	0.439982	Nprl2
S100a6	0.373268	0.812155	0.438886	S100a6
Isyna1	0.804367	1.24239	0.438022	Isyna1
Yipf3	0.375872	0.813823	0.437951	Yipf3
Ensa	0.187596	0.625084	0.437487	Ensa
Idua	0	0.437134	0.437134	Idua
Grcc10	0.688771	1.12404	0.435266	Grcc10
Brd2	0.394239	0.829093	0.434854	Brd2
Adprhl2	0.322496	0.757317	0.434821	Adprhl2
Rpa3	0.0657405	0.498242	0.432501	Rpa3
Bmyc	0.432972	0.864706	0.431733	Bmyc
Rps12-ps3	0.763118	1.19477	0.431656	Rps12-ps3
Zfand5	0.461537	0.891784	0.430247	Zfand5
Hes1	1.24647	1.67667	0.430206	Hes1
Dctn3	0.297589	0.727013	0.429423	Dctn3
Olfml3	0.180165	0.609507	0.429342	Olfml3
Srsf2	0.922266	1.35019	0.427924	Srsf2
Zfp36l2	0.175089	0.602422	0.427333	Zfp36l2
Tmem165	0.289505	0.714624	0.425119	Tmem165
Gtf3c6	0	0.423931	0.423931	Gtf3c6
Tbl3	0	0.423572	0.423572	Tbl3
Mtcl1	0	0.42357	0.42357	Mtcl1
S100a10	0	0.423452	0.423452	S100a10
Gm13889	1.43884	1.8616	0.422757	Gm13889
Mrpl57	0.497621	0.920159	0.422539	Mrpl57
Ing4	0.150862	0.572923	0.422061	Ing4
Cmc2	0.121128	0.542615	0.421488	Cmc2
Stx7	0.336206	0.757017	0.420811	Stx7
Ube2d2a	0.780263	1.20107	0.420803	Ube2d2a
Plxnb1	0.0972735	0.517902	0.420629	Plxnb1
Ankrd46	0.245868	0.666386	0.420517	Ankrd46
Actg1	2.0348	2.45504	0.42024	Actg1
Abr	0.425471	0.845328	0.419857	Abr
Pcnp	0.548694	0.968111	0.419417	Pcnp
Cs	0.341006	0.759907	0.418901	Cs
Ednrb	0	0.418702	0.418702	Ednrb
Stom	0.055716	0.473708	0.417992	Stom
Poglut1	0.0977106	0.515009	0.417299	Poglut1
Stat6	0.187418	0.604054	0.416635	Stat6
Atf4	0.254733	0.671051	0.416318	Atf4
Atp6ap2	0.474487	0.889896	0.415409	Atp6ap2
Ndufc1	1.2657	1.68091	0.415204	Ndufc1
2700097O09Rik	0.0686329	0.483273	0.41464	2700097O09Rik
Tmem216	0.129341	0.543706	0.414366	Tmem216
Cnih1	0.196073	0.610378	0.414305	Cnih1
Cep44	0	0.41385	0.41385	Cep44
Lsm8	0.265235	0.679028	0.413793	Lsm8
Hnrnpll	0	0.413137	0.413137	Hnrnpll
Krtcap2	0.802706	1.21564	0.412933	Krtcap2
Zfp422	0.128451	0.540017	0.411566	Zfp422
Eef2	2.03369	2.44495	0.411258	Eef2
Naxd	0.227906	0.638372	0.410466	Naxd
Rpl35	1.58745	1.99756	0.410102	Rpl35
Dram2	0.197234	0.606103	0.408869	Dram2
Gid8	0	0.407425	0.407425	Gid8
Cyb5a	1.04593	1.45313	0.407194	Cyb5a
Nus1	0.166076	0.573253	0.407177	Nus1
Sars	0.273437	0.679226	0.40579	Sars
Tarbp2	0	0.40535	0.40535	Tarbp2
Bag5	0.155574	0.560417	0.404844	Bag5
Cped1	0.160843	0.565639	0.404797	Cped1
Col3a1	0.13042	0.534082	0.403662	Col3a1
Atp2a2	0.883689	1.28707	0.403384	Atp2a2
Col18a1	0.158424	0.561575	0.403151	Col18a1
Mbp	1.88373	2.28601	0.402283	Mbp
Limd2	0.231792	0.633944	0.402153	Limd2
Fat1	0.0946352	0.496323	0.401688	Fat1
C1galt1c1	0.13042	0.530599	0.400179	C1galt1c1
Mrpl4	0.442983	0.842342	0.399359	Mrpl4
Ndufa3	1.15841	1.55762	0.399218	Ndufa3
Gm10076	0.38562	0.784245	0.398625	Gm10076
Mical2	0.246259	0.644812	0.398554	Mical2
Impad1	0.0561214	0.454055	0.397933	Impad1
Fopnl	0	0.397697	0.397697	Fopnl
Mgat1	0.179846	0.576	0.396154	Mgat1
Rpp30	0.219299	0.615374	0.396075	Rpp30
Rnf13	0.271506	0.666591	0.395085	Rnf13
Anks3	0.200242	0.594949	0.394708	Anks3
Zcchc9	0.484136	0.877778	0.393642	Zcchc9
Sec61a1	0.109201	0.502697	0.393496	Sec61a1
Rps4x	2.14699	2.54048	0.393492	Rps4x
Jund	1.29046	1.6839	0.393433	Jund
Nupr1	1.49479	1.88794	0.393155	Nupr1
Pde5a	0.576969	0.969743	0.392773	Pde5a
Nelfe	0.311187	0.703788	0.392601	Nelfe
Aqr	0.055716	0.448084	0.392368	Aqr
Dbt	0	0.392285	0.392285	Dbt
Ubl5	1.13213	1.52405	0.391924	Ubl5
Rpl22	1.29115	1.6827	0.391555	Rpl22
Sh2b3	0.253186	0.644071	0.390884	Sh2b3
Zcrb1	0.607575	0.998218	0.390643	Zcrb1
Ddah2	0.224151	0.613596	0.389445	Ddah2
Cyhr1	0.208615	0.598031	0.389417	Cyhr1
Ppp1r9b	0	0.389018	0.389018	Ppp1r9b
Ckb	2.09038	2.47922	0.388836	Ckb
Mical1	0.0651085	0.453645	0.388536	Mical1
Ten1	0.055716	0.443467	0.387751	Ten1
Trir	0.824762	1.21214	0.387379	Trir
Nr3c1	0.261128	0.648311	0.387183	Nr3c1
Morf4l2	0.633167	1.01941	0.386244	Morf4l2
Ctsh	0.216937	0.602356	0.385419	Ctsh
Ablim1	0.106452	0.491791	0.38534	Ablim1
Gpx7	0.103671	0.488653	0.384982	Gpx7
Ctsk	0	0.383981	0.383981	Ctsk
Ube2e1	0.483934	0.866883	0.382949	Ube2e1
Gpr27	0.0561214	0.437614	0.381492	Gpr27
Slc1a5	0.401753	0.783104	0.381351	Slc1a5
Lonp1	0.0403105	0.42101	0.380699	Lonp1
Rtn4	0.748073	1.12872	0.380651	Rtn4
Cnn2	1.38472	1.76525	0.380526	Cnn2
Aspscr1	0	0.380425	0.380425	Aspscr1
Bin1	0.197655	0.578029	0.380374	Bin1
Csrp1	1.84529	2.22544	0.380144	Csrp1
Cuedc1	0.512395	0.892495	0.380099	Cuedc1
Dcaf7	0.0651085	0.444921	0.379813	Dcaf7
Rogdi	0.0596921	0.438833	0.379141	Rogdi
Clmp	0	0.378114	0.378114	Clmp
Ptms	1.51185	1.88861	0.376761	Ptms
Zfp703	0.13328	0.509835	0.376555	Zfp703
Pdlim1	0.382217	0.758552	0.376335	Pdlim1
Slc11a2	0	0.376001	0.376001	Slc11a2
Akirin2	0.36369	0.739586	0.375896	Akirin2
Cox7a2l	1.14535	1.52104	0.37569	Cox7a2l
Rpp21	0.516615	0.892071	0.375456	Rpp21
Gna12	0	0.375038	0.375038	Gna12
Gbe1	0.191875	0.566849	0.374974	Gbe1
Irf2bp2	0.246248	0.620418	0.37417	Irf2bp2
Hsp90aa1	1.34177	1.71542	0.373646	Hsp90aa1
Zdhhc4	0.133644	0.506343	0.372699	Zdhhc4
Impdh2	0.429712	0.802066	0.372354	Impdh2
Rbm48	0.165992	0.538162	0.37217	Rbm48
Uck1	0.0554048	0.427463	0.372058	Uck1
Prelid3b	0.121739	0.493734	0.371995	Prelid3b
Mxra7	0.399905	0.771823	0.371917	Mxra7
Sh3bp5l	0	0.371671	0.371671	Sh3bp5l
Gstt1	0.388445	0.760113	0.371668	Gstt1
Orai3	0.501139	0.872597	0.371458	Orai3
Slc35f5	0.179481	0.550655	0.371174	Slc35f5
Atg4b	0.158303	0.528657	0.370355	Atg4b
Zfp787	0.16288	0.533211	0.370331	Zfp787
Ppp4c	0.417191	0.786405	0.369214	Ppp4c
Thsd7a	0	0.368849	0.368849	Thsd7a
Glrx	0.0561214	0.423491	0.36737	Glrx
Zic1	1.40461	1.77178	0.367169	Zic1
Sirpa	0	0.366946	0.366946	Sirpa
Hspbp1	0	0.366809	0.366809	Hspbp1
Wasl	0.371577	0.738156	0.366579	Wasl
Rnd2	0.409648	0.775315	0.365667	Rnd2
Atp6v0b	0.91004	1.27533	0.365288	Atp6v0b
Rpl13a	1.76737	2.13258	0.365206	Rpl13a
Tgfbrap1	0	0.365077	0.365077	Tgfbrap1
Zfp40	0	0.365008	0.365008	Zfp40
Gnas	2.4068	2.7706	0.363798	Gnas
Calu	0.324943	0.688447	0.363504	Calu
Fkbp3	0.600781	0.964217	0.363436	Fkbp3
Gramd1a	0	0.363395	0.363395	Gramd1a
Peli2	0.248158	0.61113	0.362972	Peli2
Ddost	0.760423	1.12322	0.362801	Ddost
Tmem219	0.44648	0.809192	0.362712	Tmem219
Dnaja2	0.527681	0.890314	0.362633	Dnaja2
mt-Co1	3.69068	4.05305	0.362374	mt-Co1
Pcdh1	0.411728	0.77406	0.362332	Pcdh1
Nap1l1	0.740009	1.10121	0.361199	Nap1l1
Arid1b	0.1464	0.507569	0.361169	Arid1b
Rcn3	0.845416	1.20623	0.360814	Rcn3
S100a13	0.321809	0.682281	0.360472	S100a13
Cpq	0.535102	0.895048	0.359946	Cpq
Smim19	0.0403105	0.400221	0.359911	Smim19
Mxi1	0.134128	0.493844	0.359716	Mxi1
Cox11	0	0.359555	0.359555	Cox11
Immp1l	0.525295	0.88462	0.359325	Immp1l
Ccl27a	0.0596921	0.418464	0.358772	Ccl27a
Sde2	0	0.358322	0.358322	Sde2
Alkbh5	0.543814	0.902114	0.3583	Alkbh5
Acap3	0.0666878	0.4249	0.358212	Acap3
Ssr4	0.821217	1.1794	0.358187	Ssr4
Neurl1b	0	0.357527	0.357527	Neurl1b
Psmc1	0.643813	1.00127	0.357452	Psmc1
Usp50	0.287701	0.645101	0.357401	Usp50
Rpl39	2.29864	2.65595	0.357315	Rpl39
Btg3	0.13328	0.490208	0.356928	Btg3
Snta1	0.055716	0.411691	0.355975	Snta1
Coa3	0.73834	1.09421	0.355872	Coa3
Polr2l	0.381781	0.73741	0.355628	Polr2l
Commd4	0.288396	0.643963	0.355567	Commd4
Mettl7a1	0.0666878	0.422162	0.355474	Mettl7a1
Herpud2	0.24385	0.599258	0.355408	Herpud2
Mat2a	0.918904	1.27411	0.355205	Mat2a
Tbca	0.942492	1.29756	0.355066	Tbca
Dhrs1	0	0.354355	0.354355	Dhrs1
Tor1a	0.318575	0.672541	0.353966	Tor1a
Gm31409	0.255565	0.609136	0.35357	Gm31409
Ttc33	0.274817	0.628327	0.35351	Ttc33
Efemp1	0	0.353273	0.353273	Efemp1
Tom1l2	0.0657405	0.418771	0.35303	Tom1l2
Dstn	2.25614	2.60876	0.352619	Dstn
Faap100	0.144868	0.497217	0.352349	Faap100
Elovl1	0.292831	0.645091	0.35226	Elovl1
Itm2c	1.43703	1.7889	0.351862	Itm2c
Snrpd1	0.478629	0.830473	0.351845	Snrpd1
Ahsa1	0.600897	0.952718	0.351821	Ahsa1
Elk3	0.0567754	0.408304	0.351529	Elk3
Vps36	0.377711	0.729214	0.351502	Vps36
Sept8	0.668375	1.01965	0.351279	Sept8
Timm8b	0.664229	1.015	0.350772	Timm8b
Lpl	0.180571	0.530186	0.349615	Lpl
Mrpl41	0.421635	0.771014	0.349379	Mrpl41
Atf5	0.669899	1.01925	0.349348	Atf5
Ntn4	0.377879	0.72688	0.349001	Ntn4
Hexa	0.260998	0.60876	0.347762	Hexa
Tprgl	1.36015	1.70777	0.347621	Tprgl
Prdx5	1.27805	1.6256	0.34755	Prdx5
Vamp5	0.268145	0.61548	0.347334	Vamp5
Nab1	0.486825	0.833151	0.346326	Nab1
Trim28	0.200971	0.546858	0.345887	Trim28
Tpst1	0.442357	0.787989	0.345632	Tpst1
Asb7	0	0.345557	0.345557	Asb7
Rps10	1.72876	2.07418	0.345422	Rps10
Xxylt1	0	0.345181	0.345181	Xxylt1
Etfdh	0.158228	0.503173	0.344945	Etfdh
Spata7	0.0686329	0.413298	0.344666	Spata7
Grn	0.642639	0.987268	0.344629	Grn
Ehd1	0.235122	0.578955	0.343832	Ehd1
Sptan1	0.348097	0.69186	0.343763	Sptan1
Mrps2	0	0.343721	0.343721	Mrps2
Dars	0.213824	0.557539	0.343715	Dars
Cpsf3	0.233827	0.577209	0.343382	Cpsf3
Lrrc8a	0.268608	0.611492	0.342884	Lrrc8a
Sdhaf1	0.367603	0.710335	0.342733	Sdhaf1
Tmco1	1.01368	1.35605	0.342364	Tmco1
Atp5e	1.60471	1.9469	0.342195	Atp5e
Nudc	0.840446	1.18251	0.342064	Nudc
Tmem14c	0.489799	0.83183	0.342032	Tmem14c
Arfgap2	0.587781	0.929712	0.341931	Arfgap2
Lrrc14	0	0.341873	0.341873	Lrrc14
Pla2g12a	0.294359	0.636074	0.341715	Pla2g12a
Fxr2	0	0.341637	0.341637	Fxr2
Spin1	0.329084	0.669881	0.340798	Spin1
Ngdn	0.242403	0.583035	0.340632	Ngdn
Prkar1b	0.328063	0.668378	0.340315	Prkar1b
Tmem259	0.0823293	0.422285	0.339955	Tmem259
Gas6	0.545817	0.885608	0.339792	Gas6
Exosc1	0.138426	0.477685	0.339259	Exosc1
Nfya	0	0.339247	0.339247	Nfya
Dexi	0.0596921	0.398782	0.33909	Dexi
Lrrk1	0.199785	0.538655	0.338871	Lrrk1
Jkamp	0.348601	0.687223	0.338622	Jkamp
Pdlim5	0.0403105	0.37881	0.338499	Pdlim5
Chkb	0	0.33836	0.33836	Chkb
March7	0.293465	0.631667	0.338203	March7
9530026P05Rik	0.0561214	0.394219	0.338097	9530026P05Rik
Hspe1	0.926857	1.26486	0.337998	Hspe1
Prkcd	0	0.337476	0.337476	Prkcd
Elmo2	0.0823293	0.419619	0.337289	Elmo2
Dmac1	0.386822	0.723737	0.336915	Dmac1
Plekhb1	0.0567754	0.393527	0.336751	Plekhb1
Akr1a1	1.17433	1.51047	0.336135	Akr1a1
Maip1	0.0567754	0.392777	0.336002	Maip1
Timp2	0.332073	0.667849	0.335775	Timp2
Ppp2r3d	0.192169	0.526743	0.334574	Ppp2r3d
Col1a2	0.775227	1.10969	0.334468	Col1a2
Fbxo3	0.136586	0.471013	0.334427	Fbxo3
Imp3	1.0954	1.42975	0.334355	Imp3
Nop53	1.1998	1.5335	0.333696	Nop53
Mcee	0.432446	0.765641	0.333195	Mcee
D17H6S53E	0.0561214	0.388447	0.332326	D17H6S53E
Sec24b	0	0.332033	0.332033	Sec24b
Maz	0	0.331958	0.331958	Maz
Rad17	0.0561214	0.388	0.331878	Rad17
Gstp1	0.430982	0.762365	0.331382	Gstp1
Rhbdf1	0.337034	0.668082	0.331048	Rhbdf1
Gas8	0	0.330863	0.330863	Gas8
Yaf2	0.34299	0.673479	0.33049	Yaf2
Apoe	2.67085	3.00111	0.330259	Apoe
Pex6	0.0567754	0.38688	0.330105	Pex6
1110059G10Rik	0.186733	0.516645	0.329913	1110059G10Rik
Lyrm4	0	0.329581	0.329581	Lyrm4
Snapin	0.488147	0.817494	0.329346	Snapin
Clip1	0.547027	0.876284	0.329257	Clip1
Mbd6	0	0.328678	0.328678	Mbd6
Rpl10a	1.86174	2.19016	0.328418	Rpl10a
Mvk	0	0.328035	0.328035	Mvk
Dohh	0.498357	0.825954	0.327597	Dohh
Tns1	1.43785	1.76479	0.326933	Tns1
Rps7	2.0237	2.35038	0.326679	Rps7
Crim1	0.840778	1.16715	0.326374	Crim1
Nr2f1	0.299429	0.625521	0.326092	Nr2f1
Taf12	0.128606	0.454521	0.325915	Taf12
Ccs	0.262056	0.587885	0.325829	Ccs
Tomm6	0.118399	0.444078	0.32568	Tomm6
Irak1bp1	0.117403	0.442945	0.325542	Irak1bp1
Gprc5b	0	0.325407	0.325407	Gprc5b
Zfp263	0.190909	0.516219	0.32531	Zfp263
Utp18	0	0.324448	0.324448	Utp18
Phyh	0.465286	0.789676	0.32439	Phyh
Lrp1	0.728389	1.0526	0.324209	Lrp1
Lmcd1	0.0554048	0.379491	0.324086	Lmcd1
Msantd4	0.245482	0.569318	0.323836	Msantd4
Rnf10	0.860641	1.18408	0.323438	Rnf10
Cpne3	0.475496	0.79877	0.323274	Cpne3
Ltbp3	0	0.322981	0.322981	Ltbp3
Akr7a5	0.238088	0.560945	0.322856	Akr7a5
Tshz2	0.191486	0.514067	0.322582	Tshz2
Calm3	1.28474	1.60715	0.322415	Calm3
Rpl36a	1.40476	1.72717	0.322402	Rpl36a
Tfdp2	0	0.322202	0.322202	Tfdp2
Mtor	0.0554048	0.377558	0.322153	Mtor
Gkap1	0.161928	0.483129	0.321202	Gkap1
Txn2	1.26565	1.58682	0.321177	Txn2
Pdrg1	0.495581	0.816473	0.320892	Pdrg1
Hsdl2	0.179488	0.500312	0.320824	Hsdl2
Wbp2	0.566761	0.887526	0.320765	Wbp2
Psme1	0.600986	0.921708	0.320721	Psme1
Scand1	0.99813	1.31869	0.320559	Scand1
Zfp157	0.0823293	0.40229	0.319961	Zfp157
Isoc1	0	0.319762	0.319762	Isoc1
Il6st	0.487223	0.806753	0.31953	Il6st
Tmub2	0.0567754	0.376259	0.319484	Tmub2
Aig1	0.29406	0.612422	0.318362	Aig1
Fam173a	0.420422	0.738301	0.317878	Fam173a
Rassf1	0.575049	0.892896	0.317847	Rassf1
Afg3l2	0.184718	0.502213	0.317496	Afg3l2
Tubb6	0.0818198	0.3989	0.31708	Tubb6
Tmem57	0.0814358	0.398072	0.316637	Tmem57
D230025D16Rik	0.0657405	0.382087	0.316346	D230025D16Rik
Btbd10	0.0651085	0.381378	0.31627	Btbd10
Kmt5a	0	0.316256	0.316256	Kmt5a
Slc12a4	0.234716	0.550139	0.315423	Slc12a4
Col27a1	0.243544	0.5583	0.314756	Col27a1
Efemp2	0.767623	1.08231	0.314683	Efemp2
Ddx56	0.218911	0.533391	0.31448	Ddx56
Col8a1	0	0.313373	0.313373	Col8a1
Ppm1m	0.218783	0.532083	0.313301	Ppm1m
Tpcn1	0.1269	0.440115	0.313215	Tpcn1
Mlf2	1.1474	1.46061	0.313211	Mlf2
Tubb4b	0.930857	1.24406	0.313208	Tubb4b
Ctsb	1.04765	1.3602	0.312549	Ctsb
Hspa8	2.14171	2.4542	0.312497	Hspa8
Mfap2	0.100333	0.412269	0.311936	Mfap2
Mrps18a	0.682187	0.994069	0.311882	Mrps18a
Gm3764	0	0.311877	0.311877	Gm3764
Xpnpep1	0.0403105	0.352087	0.311777	Xpnpep1
Foxf2	0.649362	0.961042	0.31168	Foxf2
Vwa1	0.362863	0.674018	0.311154	Vwa1
Slc6a17	0	0.31112	0.31112	Slc6a17
Mrpl34	0.221556	0.532445	0.310889	Mrpl34
Fkbp4	0.707391	1.01822	0.310826	Fkbp4
Rps27a	2.34552	2.65623	0.310714	Rps27a
Deaf1	0	0.310581	0.310581	Deaf1
Cenpx	0.2155	0.525707	0.310206	Cenpx
Tsen15	0.128606	0.438598	0.309992	Tsen15
Cnnm2	0.276081	0.586014	0.309933	Cnnm2
Lpp	0.582702	0.892412	0.309711	Lpp
Rps21	2.03283	2.34251	0.309688	Rps21
Lsm6	0.538913	0.848374	0.309461	Lsm6
Gpi1	0.958944	1.26806	0.309113	Gpi1
Slc25a39	0.0561214	0.364447	0.308326	Slc25a39
Rnf38	0.055716	0.364039	0.308323	Rnf38
Smim27	0.464828	0.772938	0.308111	Smim27
Cd9	1.00897	1.31692	0.307951	Cd9
Nqo2	0	0.307774	0.307774	Nqo2
Rhob	0.852469	1.16023	0.307756	Rhob
Knop1	0.274553	0.582202	0.307648	Knop1
mt-Nd2	2.45032	2.75761	0.307297	mt-Nd2
Zmiz1	0	0.307207	0.307207	Zmiz1
Tmem41a	0.055716	0.362664	0.306948	Tmem41a
Hdhd2	0.349624	0.656568	0.306945	Hdhd2
Mbd3	0.4071	0.713914	0.306814	Mbd3
Jade2	0	0.306769	0.306769	Jade2
Mphosph8	0.252042	0.558798	0.306756	Mphosph8
Tpt1	2.38701	2.69373	0.306717	Tpt1
Oxa1l	0.180571	0.487069	0.306498	Oxa1l
Polr2j	0.615319	0.921747	0.306428	Polr2j
Rpl27a	2.46216	2.76855	0.306396	Rpl27a
Timp3	1.42776	1.7341	0.306342	Timp3
Ldha	1.15139	1.45727	0.305873	Ldha
AI987944	0.191731	0.49758	0.305849	AI987944
Prmt1	0.682673	0.988356	0.305683	Prmt1
Ier3	0.373022	0.678511	0.305488	Ier3
Atad3a	0	0.305484	0.305484	Atad3a
Rab18	1.09088	1.39633	0.305454	Rab18
Acta2	4.02786	4.33326	0.305403	Acta2
Ube2k	0.598897	0.904267	0.30537	Ube2k
Foxs1	1.09235	1.39744	0.305082	Foxs1
Adamtsl1	0.279043	0.58394	0.304897	Adamtsl1
Arl14ep	0.0651085	0.369676	0.304567	Arl14ep
Tmem5	0.351258	0.65575	0.304492	Tmem5
Ddx18	0.308944	0.613043	0.304099	Ddx18
Tmem140	0.266942	0.570939	0.303997	Tmem140
Aen	0.121128	0.424603	0.303475	Aen
Mrfap1	1.43694	1.74027	0.303325	Mrfap1
Fam174a	1.01711	1.32031	0.3032	Fam174a
Sesn1	0.180307	0.483457	0.303151	Sesn1
Atp6v0a1	0.15566	0.458496	0.302836	Atp6v0a1
Ap2a1	0.140965	0.443489	0.302524	Ap2a1
Tuba1b	2.02427	2.32677	0.302498	Tuba1b
Rabggtb	0.119039	0.421042	0.302004	Rabggtb
Ube3a	0.764952	1.06687	0.301915	Ube3a
Pltp	0.488365	0.789771	0.301406	Pltp
Ifit3	0	0.301191	0.301191	Ifit3
Rtcb	0.460437	0.761272	0.300835	Rtcb
Papss1	0.503085	0.803678	0.300593	Papss1
Ppargc1b	0.163785	0.464244	0.300459	Ppargc1b
Rplp1	2.37338	2.6737	0.300321	Rplp1
Pigk	0.279753	0.580072	0.300318	Pigk
Snhg12	0.0403105	0.339566	0.299256	Snhg12
Lbh	1.70045	1.99952	0.299071	Lbh
Ptgis	0.201592	0.50065	0.299057	Ptgis
Limk1	0.367726	0.666574	0.298848	Limk1
Cd2bp2	0	0.298295	0.298295	Cd2bp2
Slc35e4	0.201591	0.498903	0.297313	Slc35e4
Mrpl17	0.663524	0.960806	0.297282	Mrpl17
Palld	1.11702	1.41373	0.296708	Palld
Map3k11	0	0.296613	0.296613	Map3k11
Bcat2	0.0823293	0.378787	0.296458	Bcat2
Sipa1l1	0	0.296454	0.296454	Sipa1l1
Calcoco1	0.321012	0.617317	0.296305	Calcoco1
Edem1	0.0657405	0.361857	0.296116	Edem1
Rps8	2.59138	2.88749	0.296116	Rps8
Stat5b	0	0.296103	0.296103	Stat5b
Med27	0.0818198	0.37758	0.29576	Med27
Agpat4	0.162613	0.458168	0.295554	Agpat4
Sox4	0.199459	0.494946	0.295487	Sox4
Maea	0.119385	0.414825	0.295439	Maea
Pgls	0.817704	1.11314	0.295439	Pgls
Rem1	0.851513	1.14653	0.295018	Rem1
Ccdc186	0.119985	0.414874	0.294889	Ccdc186
Pkm	1.94018	2.23504	0.294863	Pkm
Ubxn1	0.877613	1.1721	0.294484	Ubxn1
Map2k3	0.238366	0.532827	0.294461	Map2k3
Kctd1	0.729001	1.02284	0.293835	Kctd1
Kmt2d	0.177407	0.470786	0.293379	Kmt2d
Rnf14	0.510594	0.803928	0.293333	Rnf14
Psmd13	0.685363	0.978044	0.292682	Psmd13
Trpc1	0.30062	0.592952	0.292333	Trpc1
Slc33a1	0.055716	0.348032	0.292316	Slc33a1
Asl	0	0.292285	0.292285	Asl
Apmap	0.198447	0.490343	0.291896	Apmap
Glrx3	0.435153	0.726793	0.29164	Glrx3
Pum3	0.0984598	0.39008	0.29162	Pum3
Kcnk2	0	0.291354	0.291354	Kcnk2
Fam212b	0.220521	0.511569	0.291047	Fam212b
Sypl	0.773183	1.06421	0.29103	Sypl
Rabl2	0	0.290716	0.290716	Rabl2
Serp1	0.580937	0.871539	0.290602	Serp1
Kctd15	0	0.290601	0.290601	Kctd15
Zfand2b	0.214488	0.504931	0.290443	Zfand2b
Vps13d	0	0.289995	0.289995	Vps13d
2610008E11Rik	0.0950251	0.38444	0.289415	2610008E11Rik
Lgals8	0.19021	0.478778	0.288568	Lgals8
Gpr107	0.104291	0.392796	0.288504	Gpr107
Rtf1	0.631425	0.919854	0.288429	Rtf1
Rgcc	0.893032	1.1814	0.288366	Rgcc
Eaf1	0	0.28832	0.28832	Eaf1
Mrps12	0.3888	0.677093	0.288293	Mrps12
Faf1	0.0567754	0.344939	0.288164	Faf1
Rftn2	0.277414	0.565529	0.288115	Rftn2
Zcchc6	0.0596921	0.347722	0.28803	Zcchc6
Smim15	0.35866	0.646483	0.287823	Smim15
Dnajc17	0.0818198	0.369508	0.287688	Dnajc17
Phc2	0.131372	0.418672	0.287301	Phc2
Tspan3	1.48328	1.77054	0.287265	Tspan3
Mlec	0	0.287237	0.287237	Mlec
Hspa9	0.76916	1.05635	0.287193	Hspa9
Dvl3	0.0403105	0.327411	0.2871	Dvl3
Rpsa	1.7325	2.01952	0.28702	Rpsa
Mrps35	0.132472	0.41949	0.287018	Mrps35
Rpl17	2.32572	2.61273	0.287011	Rpl17
AU040320	0	0.28701	0.28701	AU040320
Lrrc75a	0.104279	0.391211	0.286933	Lrrc75a
Lsm4	0.847183	1.13391	0.286729	Lsm4
Nbdy	0.482245	0.768539	0.286294	Nbdy
Hsd11b1	0.1705	0.456605	0.286105	Hsd11b1
Pop4	0.0411039	0.326957	0.285853	Pop4
Sbds	0.777415	1.06323	0.285819	Sbds
Sdhc	0.981679	1.26725	0.285573	Sdhc
Mapk8ip1	0.263934	0.549252	0.285318	Mapk8ip1
Atp5g3	1.11667	1.40171	0.285038	Atp5g3
Rpl26	2.51028	2.79528	0.285	Rpl26
Ncf2	0.689029	0.973961	0.284932	Ncf2
Uchl1	1.08943	1.37429	0.28486	Uchl1
Xpa	0.31213	0.596634	0.284504	Xpa
Rps3a1	2.43402	2.71826	0.284238	Rps3a1
Nrbf2	0.0950251	0.379176	0.284151	Nrbf2
Nudt16l1	0.375797	0.659703	0.283907	Nudt16l1
Tead2	0.250001	0.533884	0.283883	Tead2
Aimp2	0.193125	0.476895	0.28377	Aimp2
Atp6v1f	1.41359	1.69719	0.283596	Atp6v1f
Hist1h2bc	0.614833	0.898338	0.283504	Hist1h2bc
Col15a1	0	0.283479	0.283479	Col15a1
Dnajc14	0.264035	0.547513	0.283478	Dnajc14
Zfp280d	0.118747	0.402071	0.283325	Zfp280d
Smg9	0	0.283236	0.283236	Smg9
Pkn1	0.197098	0.480272	0.283175	Pkn1
Sharpin	0.266278	0.549437	0.283158	Sharpin
Nprl3	0.0567754	0.339887	0.283112	Nprl3
Pias3	0.0651085	0.347061	0.281953	Pias3
Ctsl	1.29126	1.57318	0.281923	Ctsl
0610012G03Rik	0.507494	0.789381	0.281888	0610012G03Rik
Wbp1	0.330374	0.612167	0.281793	Wbp1
Pik3cd	0	0.281707	0.281707	Pik3cd
Nthl1	0.0411039	0.322516	0.281412	Nthl1
Ttc23	0	0.281382	0.281382	Ttc23
Drg2	0.141602	0.422869	0.281266	Drg2
Hsbp1	1.25119	1.53241	0.281219	Hsbp1
Bfar	0.461704	0.74265	0.280946	Bfar
Slc20a2	0.239887	0.520575	0.280688	Slc20a2
Pnpla2	0.579151	0.859543	0.280391	Pnpla2
Asb8	0.0935836	0.373797	0.280214	Asb8
Polr2f	0.961535	1.24173	0.280198	Polr2f
Spcs3	0.265011	0.545175	0.280164	Spcs3
Tpgs1	0.557029	0.83716	0.280131	Tpgs1
F3	0	0.280073	0.280073	F3
Map2	0.256609	0.536599	0.27999	Map2
Lamtor4	0.624453	0.904327	0.279874	Lamtor4
Ppt1	0.70405	0.983872	0.279823	Ppt1
Gpatch2l	0	0.279708	0.279708	Gpatch2l
Leprotl1	0.460553	0.740172	0.279619	Leprotl1
Pdzd11	0.371427	0.651039	0.279613	Pdzd11
St6gal1	0	0.279369	0.279369	St6gal1
Notch3	1.52891	1.80819	0.279275	Notch3
Gnl3l	0.112263	0.391355	0.279092	Gnl3l
Flrt2	0	0.279056	0.279056	Flrt2
Srek1ip1	0	0.278494	0.278494	Srek1ip1
Ppp2ca	0.403173	0.681648	0.278475	Ppp2ca
Fgfr1	0.518363	0.796816	0.278453	Fgfr1
Map7d1	0.559365	0.837783	0.278418	Map7d1
Mdfic	0	0.278347	0.278347	Mdfic
Cyth2	0.300159	0.57849	0.278331	Cyth2
Zfp932	0	0.27823	0.27823	Zfp932
Slc22a17	0.163711	0.441941	0.27823	Slc22a17
Tatdn1	0.0411039	0.318473	0.277369	Tatdn1
Rps29	2.93331	3.21068	0.277364	Rps29
Rnf103	0.0561214	0.333381	0.27726	Rnf103
Pfdn4	0.383577	0.660509	0.276932	Pfdn4
Pir	0.104018	0.380655	0.276637	Pir
Ints14	0	0.276631	0.276631	Ints14
9430038I01Rik	0	0.276579	0.276579	9430038I01Rik
Ttr	0	0.276495	0.276495	Ttr
Zfp64	0.0561214	0.332512	0.27639	Zfp64
Tfip11	0.1269	0.40288	0.27598	Tfip11
Prdx1	2.02359	2.29949	0.275899	Prdx1
Mobp	0.628122	0.90365	0.275528	Mobp
Rps13	2.08317	2.35812	0.274949	Rps13
Atad1	0.559765	0.834247	0.274482	Atad1
Gabbr1	0.147632	0.421868	0.274235	Gabbr1
Zfp385a	0	0.274045	0.274045	Zfp385a
9530034E10Rik	0.0411039	0.315137	0.274033	9530034E10Rik
Tob1	0.317316	0.59131	0.273994	Tob1
Pear1	0.742564	1.01616	0.273594	Pear1
Hsp90b1	1.1157	1.38925	0.273555	Hsp90b1
Tmod1	0.112263	0.385702	0.273439	Tmod1
Ptgfrn	0.0823293	0.355368	0.273039	Ptgfrn
Tbc1d10a	0.0567754	0.329488	0.272712	Tbc1d10a
Plekhb2	0.118747	0.391445	0.272699	Plekhb2
Med21	0.367013	0.639629	0.272616	Med21
Mmd	0.252635	0.525225	0.27259	Mmd
Arpin	0.0814358	0.353979	0.272543	Arpin
Nelfcd	0.321277	0.593616	0.272339	Nelfcd
Wdr83	0.188718	0.460798	0.27208	Wdr83
Smarca5	0.531215	0.803216	0.272001	Smarca5
Cebpd	0.253854	0.525703	0.271848	Cebpd
Rell1	0.695777	0.967563	0.271786	Rell1
H1f0	1.21263	1.48428	0.271654	H1f0
Ppt2	0.265399	0.536894	0.271495	Ppt2
1810022K09Rik	0.345085	0.616484	0.2714	1810022K09Rik
Rufy2	0	0.271227	0.271227	Rufy2
Ptp4a1	0.455292	0.726502	0.27121	Ptp4a1
Dolk	0.0666878	0.337654	0.270967	Dolk
Rpl9-ps1	0.0651085	0.335889	0.270781	Rpl9-ps1
Bcl2l13	0	0.270702	0.270702	Bcl2l13
Amigo2	0.116021	0.386675	0.270655	Amigo2
Chmp7	0.247772	0.518425	0.270652	Chmp7
Picalm	0.303634	0.57426	0.270626	Picalm
Naa38	0.539641	0.810077	0.270436	Naa38
Ano10	0.140681	0.411102	0.270421	Ano10
Stk38l	0.158058	0.428421	0.270363	Stk38l
Rassf2	0	0.270103	0.270103	Rassf2
Sec24d	0.0823293	0.352256	0.269927	Sec24d
Mrgbp	0	0.269894	0.269894	Mrgbp
Ndufb7	1.35307	1.62244	0.26937	Ndufb7
Slc27a1	0.0554048	0.324542	0.269137	Slc27a1
Pea15a	0.751532	1.02052	0.268989	Pea15a
Rbms2	0.162424	0.43138	0.268957	Rbms2
Trp53i11	0.64228	0.911025	0.268744	Trp53i11
Filip1	0.37717	0.645868	0.268698	Filip1
0610009B22Rik	0.325861	0.594477	0.268617	0610009B22Rik
Eri3	0.354445	0.622927	0.268483	Eri3
Eef2k	0.233345	0.50181	0.268465	Eef2k
Zscan26	0.164443	0.432903	0.26846	Zscan26
Fos	0.108491	0.376935	0.268444	Fos
Hnrnph3	0.549986	0.817883	0.267896	Hnrnph3
Gps2	0.331278	0.599129	0.267851	Gps2
Hypk	0.625124	0.892768	0.267644	Hypk
Npnt	0	0.267543	0.267543	Npnt
A830082K12Rik	0.460733	0.728244	0.26751	A830082K12Rik
Mrpl52	1.00041	1.26788	0.267467	Mrpl52
Mtdh	0.827163	1.0945	0.26734	Mtdh
Rbp1	0.0666878	0.334019	0.267331	Rbp1
Pam	0.77438	1.04169	0.26731	Pam
Rarb	0	0.267254	0.267254	Rarb
Il17rc	0.0657405	0.332784	0.267044	Il17rc
Tgfbr1	0.055716	0.322692	0.266976	Tgfbr1
Adam15	0	0.26684	0.26684	Adam15
Ebp	0.227557	0.494377	0.26682	Ebp
Sertad3	0.151112	0.417819	0.266708	Sertad3
Amz2	0.178024	0.444465	0.26644	Amz2
Trim32	0.0411039	0.307176	0.266072	Trim32
Parm1	0.491019	0.757025	0.266006	Parm1
Sdf2	0.502336	0.768197	0.265861	Sdf2
Hprt	0.691617	0.957412	0.265795	Hprt
Gm5914	0.104018	0.369799	0.265781	Gm5914
Rfxap	0.0657405	0.331466	0.265725	Rfxap
Sort1	0.366808	0.632262	0.265454	Sort1
Chchd6	0.157638	0.422902	0.265264	Chchd6
Mageh1	0.475565	0.740762	0.265196	Mageh1
Nfatc3	0.0814358	0.346458	0.265022	Nfatc3
Pycrl	0.10519	0.369397	0.264207	Pycrl
Uckl1	0.311566	0.575688	0.264122	Uckl1
Myl12a	2.23843	2.50225	0.263817	Myl12a
Tor1b	0.25378	0.517593	0.263813	Tor1b
Cyba	1.10923	1.37293	0.263702	Cyba
Sec13	0.567258	0.83062	0.263362	Sec13
Anxa1	0.134128	0.39739	0.263261	Anxa1
Rnaseh2a	0.0843813	0.347584	0.263203	Rnaseh2a
Cyp20a1	0.615593	0.878794	0.263201	Cyp20a1
Ski	0.378568	0.641754	0.263186	Ski
Klhl7	0.226219	0.489309	0.26309	Klhl7
Gpcpd1	0.91823	1.18106	0.262829	Gpcpd1
Sdc4	0.318938	0.581638	0.2627	Sdc4
Nsmce1	0.42946	0.691906	0.262446	Nsmce1
Smap1	0.393652	0.656073	0.262422	Smap1
Spr	0.607458	0.869695	0.262237	Spr
Plpp3	1.02265	1.28485	0.262201	Plpp3
Fth1	3.53244	3.79433	0.261883	Fth1
Arpc3	0.950652	1.21236	0.261706	Arpc3
Sf1	0.323612	0.585178	0.261566	Sf1
Flot1	0.33814	0.599621	0.261481	Flot1
Ccnh	0.160275	0.421613	0.261338	Ccnh
Fam43a	0.0668323	0.328077	0.261245	Fam43a
Frmd6	0.34628	0.6069	0.260621	Frmd6
Sbno1	0.39859	0.659082	0.260493	Sbno1
Gapdh	1.65394	1.9144	0.260463	Gapdh
Ring1	0.332276	0.592684	0.260408	Ring1
Mapre3	0.29672	0.556989	0.26027	Mapre3
Cmtm7	0.154403	0.414644	0.260241	Cmtm7
Sgcb	0.127722	0.38782	0.260098	Sgcb
Tead1	0	0.259866	0.259866	Tead1
Raver2	0	0.259689	0.259689	Raver2
Sgpl1	0	0.259523	0.259523	Sgpl1
Mrps36	0.720231	0.979417	0.259186	Mrps36
Dubr	0.0567754	0.315877	0.259102	Dubr
Wdr1	0.743331	1.00235	0.259021	Wdr1
Tshz1	0.0561214	0.315071	0.25895	Tshz1
Rab22a	0.238096	0.496959	0.258862	Rab22a
Caml	0.214069	0.472899	0.25883	Caml
Zfp319	0.0843813	0.343008	0.258627	Zfp319
Pofut2	0.601672	0.860276	0.258604	Pofut2
Tagln2	1.47973	1.73829	0.258557	Tagln2
Grpel1	0.535647	0.794188	0.258541	Grpel1
Atp5j	2.06614	2.32426	0.258118	Atp5j
Mtch1	0.405011	0.662713	0.257701	Mtch1
Polr2m	0.863554	1.12124	0.257689	Polr2m
Taf1b	0.134455	0.392116	0.257661	Taf1b
Zfp503	0.055716	0.313371	0.257655	Zfp503
Rplp2	2.21649	2.47412	0.257637	Rplp2
Apc2	0.0915317	0.348964	0.257432	Apc2
Tnks	0.055716	0.312963	0.257247	Tnks
Tril	0.0946352	0.351817	0.257182	Tril
Zmat1	0	0.256936	0.256936	Zmat1
Coro1b	1.16771	1.42444	0.256732	Coro1b
Trappc1	0.213266	0.469797	0.256531	Trappc1
Ube2w	0.36592	0.622443	0.256523	Ube2w
Fahd1	0.0561214	0.312132	0.256011	Fahd1
Rpl23	2.28516	2.54108	0.255922	Rpl23
Eif2b5	0.156399	0.412232	0.255833	Eif2b5
Atad3aos	0	0.255406	0.255406	Atad3aos
Ppp1r16a	0.122221	0.377553	0.255332	Ppp1r16a
Mkks	0.10437	0.35966	0.25529	Mkks
Acp1	0.419238	0.674401	0.255163	Acp1
Dicer1	0.226103	0.481086	0.254984	Dicer1
Zfp91	0.119022	0.373905	0.254883	Zfp91
Churc1	0.767505	1.02239	0.25488	Churc1
Tcirg1	0.159763	0.414538	0.254775	Tcirg1
Maf1	0.893837	1.14853	0.254697	Maf1
Nostrin	0	0.254562	0.254562	Nostrin
Ly6e	0	0.254261	0.254261	Ly6e
Gtf3a	0.301682	0.555919	0.254237	Gtf3a
Dlst	0.408496	0.66263	0.254134	Dlst
Eif2s3y	0.291355	0.545367	0.254012	Eif2s3y
Usp5	0.29511	0.548803	0.253693	Usp5
Cdkn1c	0.71227	0.965876	0.253606	Cdkn1c
Iqsec1	0.334998	0.588603	0.253605	Iqsec1
Prnp	0.66898	0.92256	0.253579	Prnp
Gtf2b	0.300305	0.553821	0.253516	Gtf2b
Zic2	0	0.253381	0.253381	Zic2
Prickle3	0	0.253167	0.253167	Prickle3
4930453N24Rik	0.309479	0.562495	0.253016	4930453N24Rik
2410015M20Rik	1.0557	1.30854	0.252835	2410015M20Rik
Krcc1	0.840562	1.09327	0.252711	Krcc1
Cd164	0.261321	0.51395	0.252629	Cd164
Il17rd	0	0.25211	0.25211	Il17rd
Map2k2	0.747896	0.999974	0.252078	Map2k2
Litaf	0.650235	0.902288	0.252052	Litaf
Snx12	0.24727	0.499207	0.251936	Snx12
Cep83	0	0.251876	0.251876	Cep83
Becn1	0.388333	0.640175	0.251842	Becn1
Rap2a	0.137431	0.389239	0.251808	Rap2a
Mthfsd	0.105802	0.357426	0.251624	Mthfsd
Inafm2	0.119039	0.370607	0.251568	Inafm2
Eef1a1	2.94629	3.19774	0.25145	Eef1a1
Msl3	0.10437	0.355813	0.251443	Msl3
Psmd9	0.511073	0.762277	0.251205	Psmd9
Ppp1r2	1.20268	1.45385	0.251164	Ppp1r2
Tceal8	0.569562	0.820627	0.251065	Tceal8
Sumo2	1.97174	2.22272	0.250982	Sumo2
Erh	0.430897	0.681685	0.250789	Erh
Kdelr2	0.772885	1.02365	0.250765	Kdelr2
Man2c1	0.0686329	0.319224	0.250591	Man2c1
Abhd2	0.417039	0.66761	0.25057	Abhd2
Nit1	0.16505	0.415485	0.250435	Nit1
Ptprf	0	0.250422	0.250422	Ptprf
Dnajc15	0.232682	0.482713	0.250031	Dnajc15
Tmem176b	0.192854	0.442693	0.249839	Tmem176b
Bend6	0	0.249735	0.249735	Bend6
Zyx	0.445693	0.695289	0.249597	Zyx
Oat	1.02449	1.27404	0.249544	Oat
Aoc3	0.499055	0.748478	0.249422	Aoc3
Sh3pxd2a	0.0403105	0.289659	0.249349	Sh3pxd2a
Arf2	0.34942	0.598478	0.249059	Arf2
Acaa1a	0.568106	0.816997	0.248892	Acaa1a
Ifi35	0.32259	0.570924	0.248334	Ifi35
Farp1	0.196505	0.444714	0.248209	Farp1
2310011J03Rik	0.431278	0.679486	0.248209	2310011J03Rik
BC031181	1.08269	1.33076	0.248067	BC031181
Il11ra1	0.514772	0.762711	0.247939	Il11ra1
Yars	0	0.247866	0.247866	Yars
Atp6v0e	1.14236	1.39021	0.247849	Atp6v0e
Ppia	2.98001	3.22784	0.247834	Ppia
Dync1h1	0.236846	0.484623	0.247777	Dync1h1
Inip	0.113264	0.360989	0.247725	Inip
Pdik1l	0	0.247619	0.247619	Pdik1l
Metap1	0	0.247612	0.247612	Metap1
Cops6	0.652544	0.900102	0.247559	Cops6
Prpf18	0	0.247411	0.247411	Prpf18
Gadd45b	0.32106	0.568115	0.247055	Gadd45b
Snu13	1.18953	1.4365	0.246967	Snu13
Map2k4	0.055716	0.302404	0.246688	Map2k4
Anxa2	0.959572	1.20622	0.246651	Anxa2
Slc5a5	0.236897	0.483439	0.246542	Slc5a5
Htra1	0.64239	0.888907	0.246517	Htra1
Eif3h	1.0717	1.31812	0.246413	Eif3h
Zfp606	0	0.246307	0.246307	Zfp606
Pmf1	0.0411039	0.287354	0.24625	Pmf1
Chid1	0.0818198	0.32802	0.2462	Chid1
Kansl2	0.0823293	0.328511	0.246182	Kansl2
Atxn7l3b	1.13685	1.38296	0.246113	Atxn7l3b
Gne	0.12683	0.372848	0.246018	Gne
Wasf3	0.273343	0.519344	0.246001	Wasf3
Phlda3	0.290138	0.536064	0.245927	Phlda3
Tnip1	0.0403105	0.286235	0.245925	Tnip1
Polr1c	0.142211	0.388126	0.245915	Polr1c
Gem	0	0.245779	0.245779	Gem
Abraxas2	0.268302	0.514053	0.245752	Abraxas2
Gm26724	0.0818198	0.327458	0.245638	Gm26724
Dtymk	0.28487	0.530312	0.245442	Dtymk
Pym1	0.0411039	0.286469	0.245365	Pym1
Pfdn1	1.0018	1.24713	0.245335	Pfdn1
Ccdc47	0.468742	0.714053	0.245311	Ccdc47
Slc25a30	0	0.245038	0.245038	Slc25a30
Cers5	0.504253	0.748663	0.24441	Cers5
Rnf152	0.407491	0.651876	0.244385	Rnf152
Zfp524	0.118003	0.362349	0.244346	Zfp524
Ulk3	0.496617	0.740805	0.244188	Ulk3
Snx7	0.165888	0.409985	0.244097	Snx7
Bcl7c	0.677446	0.921311	0.243865	Bcl7c
Dcps	0	0.243551	0.243551	Dcps
Tbc1d17	0.339171	0.582691	0.24352	Tbc1d17
Tmsb10	1.91468	2.15815	0.24347	Tmsb10
Ccdc22	0.0668323	0.310185	0.243353	Ccdc22
Cenpt	0	0.243305	0.243305	Cenpt
Dap	0.119985	0.363276	0.243292	Dap
Brap	0.055716	0.298834	0.243118	Brap
Clstn1	0.344138	0.587139	0.243001	Clstn1
2700046A07Rik	0.410292	0.653252	0.24296	2700046A07Rik
Ift52	0.0843813	0.327303	0.242922	Ift52
Dapk3	0.105802	0.348679	0.242877	Dapk3
Uqcrq	1.41454	1.65734	0.242794	Uqcrq
Lrrc32	0.91862	1.16125	0.242626	Lrrc32
Fam53b	0.202067	0.444558	0.242492	Fam53b
Itga7	0.92714	1.16924	0.242105	Itga7
Pmepa1	0.055716	0.297763	0.242047	Pmepa1
Psap	1.79451	2.03639	0.241879	Psap
Jade1	0.178836	0.420619	0.241783	Jade1
C2cd5	0.201066	0.442756	0.241689	C2cd5
Cog3	0	0.241531	0.241531	Cog3
Ppan	0	0.241386	0.241386	Ppan
Rpl21	2.78743	3.02873	0.241297	Rpl21
Nsmce2	0.180161	0.421367	0.241206	Nsmce2
Rnf26	0.0946352	0.335779	0.241144	Rnf26
Klhl13	0.055716	0.296777	0.241061	Klhl13
Sbf1	0	0.240868	0.240868	Sbf1
Mapk3	0.792304	1.03296	0.240652	Mapk3
Klhdc2	0.490536	0.73088	0.240344	Klhdc2
Cic	0	0.240336	0.240336	Cic
Trac	0	0.240268	0.240268	Trac
Nr2c2ap	0	0.240249	0.240249	Nr2c2ap
Eef1b2	0.914483	1.15471	0.240224	Eef1b2
Pi4ka	0	0.240215	0.240215	Pi4ka
Nid1	0.703457	0.94345	0.239992	Nid1
Gimap6	0.224914	0.464884	0.23997	Gimap6
Nrd1	0.426861	0.666756	0.239894	Nrd1
Dynlt1c	0.1802	0.420055	0.239856	Dynlt1c
Gm12002	0.239423	0.479087	0.239664	Gm12002
Gga1	0.335569	0.575125	0.239556	Gga1
Ap4b1	0	0.239463	0.239463	Ap4b1
Rnf4	0.42913	0.668451	0.239321	Rnf4
Cript	0.626635	0.865952	0.239317	Cript
Lbr	0.215808	0.45511	0.239302	Lbr
Gon7	0.0666878	0.305972	0.239285	Gon7
Per3	0.642224	0.881151	0.238927	Per3
Haus8	0.0554048	0.294277	0.238872	Haus8
Gmds	0.279267	0.518134	0.238867	Gmds
Tmem127	0.055716	0.29451	0.238794	Tmem127
Rpl38	2.25332	2.49208	0.238766	Rpl38
Creld2	0.170051	0.408789	0.238738	Creld2
Slc31a1	0.243372	0.48201	0.238638	Slc31a1
Zkscan1	0.119022	0.35758	0.238558	Zkscan1
Aldh3b1	0.0814358	0.319909	0.238473	Aldh3b1
Mamdc2	0.0561214	0.294399	0.238278	Mamdc2
Adck2	0	0.238154	0.238154	Adck2
Pdcd6	0.65498	0.89297	0.23799	Pdcd6
Rhot1	0.27078	0.508535	0.237755	Rhot1
Rlim	0.162292	0.40003	0.237737	Rlim
Atg9a	0.0830684	0.320792	0.237724	Atg9a
Rbm33	0	0.237554	0.237554	Rbm33
Rbm8a	0.936923	1.17447	0.237544	Rbm8a
Higd2a	0.794031	1.03149	0.237462	Higd2a
Aldh2	1.48058	1.71795	0.237371	Aldh2
Kctd7	0.0657405	0.302975	0.237234	Kctd7
Oard1	0.558948	0.796088	0.23714	Oard1
Daxx	0.189202	0.426282	0.23708	Daxx
Sertad1	0.245522	0.482551	0.237029	Sertad1
Cacna1h	0.229718	0.466695	0.236977	Cacna1h
Fryl	0.142211	0.37917	0.236959	Fryl
1700123O20Rik	0.321024	0.557746	0.236722	1700123O20Rik
Tcf3	0.2543	0.49102	0.236721	Tcf3
Cul4b	0	0.236594	0.236594	Cul4b
Tspyl2	0.185866	0.422152	0.236286	Tspyl2
Ids	0.135415	0.37153	0.236114	Ids
Sumf2	0.0823293	0.318261	0.235931	Sumf2
Parp3	0.327024	0.562836	0.235812	Parp3
Man1a2	0.241679	0.477462	0.235783	Man1a2
March2	0.683849	0.919622	0.235774	March2
Zfp704	0	0.235737	0.235737	Zfp704
Nat10	0	0.235715	0.235715	Nat10
Ube2e2	0.164562	0.400088	0.235526	Ube2e2
Nr1h3	0.723674	0.959106	0.235432	Nr1h3
Rab34	0.339103	0.574306	0.235203	Rab34
Jagn1	0.416595	0.651771	0.235176	Jagn1
Ddx47	0.191343	0.426406	0.235063	Ddx47
Smarcb1	0.439797	0.674808	0.235011	Smarcb1
Tmed7	0.26104	0.495949	0.23491	Tmed7
Tbcc	0.177941	0.412787	0.234847	Tbcc
Rnf19a	0.190909	0.425589	0.23468	Rnf19a
Plpbp	0.39898	0.633605	0.234625	Plpbp
Atf7	0.105802	0.340416	0.234614	Atf7
Gtf2f1	0.301683	0.536277	0.234594	Gtf2f1
Ppfia1	0.0823293	0.316719	0.23439	Ppfia1
Puf60	0.769646	1.00385	0.2342	Puf60
Smad1	0.0651085	0.299128	0.23402	Smad1
Zfpl1	0.175504	0.409518	0.234014	Zfpl1
Igsf8	0.211199	0.445117	0.233918	Igsf8
Jmjd6	0.26757	0.501351	0.233781	Jmjd6
Ldlrad3	0.257845	0.491616	0.233771	Ldlrad3
Cryz	0	0.233516	0.233516	Cryz
Rbm42	0.690892	0.924327	0.233435	Rbm42
Akt1s1	0.385246	0.618513	0.233268	Akt1s1
Sirt3	0.104018	0.337166	0.233148	Sirt3
E4f1	0.156522	0.389657	0.233134	E4f1
Urgcp	0.120225	0.352994	0.232769	Urgcp
Rpl5	1.40406	1.63679	0.23273	Rpl5
Olfml2a	0.204496	0.437135	0.232639	Olfml2a
Stk19	0.258982	0.491467	0.232485	Stk19
Letmd1	0	0.232433	0.232433	Letmd1
Tmem2	0.199065	0.431444	0.232379	Tmem2
Tifa	0.0972735	0.329635	0.232362	Tifa
Msmo1	0.481513	0.713846	0.232332	Msmo1
Mocs3	0.0403105	0.272547	0.232237	Mocs3
Slc5a3	0.172567	0.404795	0.232227	Slc5a3
Prpf40b	0	0.232196	0.232196	Prpf40b
Calr	1.31892	1.5509	0.231974	Calr
Cand1	0	0.231876	0.231876	Cand1
3830406C13Rik	0.457746	0.689548	0.231802	3830406C13Rik
Pde4a	0	0.231562	0.231562	Pde4a
Cog7	1.34163	1.57309	0.231459	Cog7
Slc31a2	0	0.231452	0.231452	Slc31a2
Zfp141	0	0.231425	0.231425	Zfp141
Rnf24	0	0.231218	0.231218	Rnf24
Mtmr6	0.142211	0.373278	0.231067	Mtmr6
Ncs1	0.359362	0.590427	0.231064	Ncs1
Pcmtd1	0.500408	0.731414	0.231006	Pcmtd1
Emcn	0.57028	0.801244	0.230964	Emcn
Mrrf	0	0.230744	0.230744	Mrrf
Olfr1238	0	0.23067	0.23067	Olfr1238
Bcdin3d	0	0.230635	0.230635	Bcdin3d
Snx19	0	0.230422	0.230422	Snx19
Nuak1	0	0.230212	0.230212	Nuak1
Idh3a	0.387925	0.618117	0.230193	Idh3a
Tomm34	0.453999	0.68416	0.230161	Tomm34
Uqcc1	0.0403105	0.27033	0.230019	Uqcc1
Zc3hav1	0.354353	0.584328	0.229975	Zc3hav1
Bri3	1.09787	1.32781	0.229943	Bri3
Mcam	1.38336	1.61318	0.229823	Mcam
Unk	0	0.229754	0.229754	Unk
Setbp1	0.0411039	0.270789	0.229685	Setbp1
Gphn	0.138426	0.368024	0.229598	Gphn
Acsbg1	0	0.22935	0.22935	Acsbg1
Rmi1	0.193383	0.422652	0.229269	Rmi1
Gnb4	1.21807	1.44733	0.229261	Gnb4
Nsg1	0.100333	0.329582	0.229249	Nsg1
Evc	0.0686329	0.297705	0.229073	Evc
Cenpb	0.0554048	0.284171	0.228766	Cenpb
Grina	0.442162	0.670881	0.228719	Grina
Dus2	0.0554048	0.284064	0.22866	Dus2
Mpv17l	0	0.228383	0.228383	Mpv17l
Tomm70a	0.0977106	0.326055	0.228345	Tomm70a
Gtpbp8	0.0657405	0.294027	0.228287	Gtpbp8
Car4	2.43544	2.66363	0.228192	Car4
Nsmce4a	0.697772	0.925942	0.228169	Nsmce4a
Nipbl	0.576072	0.804082	0.228009	Nipbl
Bud23	0.0411039	0.269098	0.227994	Bud23
Slc25a11	0.576402	0.804032	0.22763	Slc25a11
Fbln5	0	0.227545	0.227545	Fbln5
Osgepl1	0.119985	0.347463	0.227478	Osgepl1
Cdk2ap2	0.876934	1.10421	0.227273	Cdk2ap2
Rpl6	2.15899	2.38623	0.227248	Rpl6
Prkd2	0	0.227225	0.227225	Prkd2
Tuba1c	0.814816	1.04202	0.227201	Tuba1c
Armt1	0	0.227063	0.227063	Armt1
Fto	0.202898	0.429896	0.226999	Fto
Sigmar1	0.259618	0.486463	0.226845	Sigmar1
Khk	0	0.226732	0.226732	Khk
Gm16286	0.327829	0.554519	0.22669	Gm16286
Fkbp8	0.815923	1.04255	0.226626	Fkbp8
Timm9	0.2009	0.427507	0.226607	Timm9
Serinc3	1.95824	2.18475	0.226503	Serinc3
Tubgcp4	0	0.226449	0.226449	Tubgcp4
Notum	0	0.226289	0.226289	Notum
Wdr73	0	0.226245	0.226245	Wdr73
Dynll2	0.514943	0.741091	0.226147	Dynll2
Sri	1.00763	1.2337	0.226067	Sri
Esyt2	0.501563	0.727625	0.226061	Esyt2
Mrpl43	0.495711	0.721749	0.226038	Mrpl43
Api5	0.360005	0.586003	0.225998	Api5
Ndufa7	1.56953	1.79551	0.225975	Ndufa7
Mpst	0.194171	0.420109	0.225938	Mpst
Snrnp40	0.395402	0.621337	0.225935	Snrnp40
Fbln7	0	0.225853	0.225853	Fbln7
Snx4	0.207793	0.433644	0.225851	Snx4
Eif4a2	1.64137	1.86722	0.225842	Eif4a2
Ttc8	0.0666878	0.292219	0.225531	Ttc8
Inpp5a	0.39893	0.624432	0.225502	Inpp5a
D630033O11Rik	0	0.225357	0.225357	D630033O11Rik
Tcf15	0.386557	0.611909	0.225352	Tcf15
Pank4	0	0.225294	0.225294	Pank4
Alg3	0	0.225236	0.225236	Alg3
Ctsd	1.32863	1.55347	0.224848	Ctsd
Rsl24d1	0.304655	0.529453	0.224798	Rsl24d1
Upf1	0	0.224687	0.224687	Upf1
Hdgf	0.183144	0.407153	0.224008	Hdgf
Otud6b	0.166588	0.390551	0.223963	Otud6b
Clk2	0	0.223826	0.223826	Clk2
Lysmd1	0	0.223826	0.223826	Lysmd1
Lrrc7	0	0.223826	0.223826	Lrrc7
Sowahc	0	0.223826	0.223826	Sowahc
Slc39a14	0	0.223826	0.223826	Slc39a14
Lacc1	0	0.223826	0.223826	Lacc1
Gm42756	0	0.223826	0.223826	Gm42756
Rab15	0	0.223826	0.223826	Rab15
Jakmip2	0	0.223826	0.223826	Jakmip2
Sema6a	0	0.223826	0.223826	Sema6a
Nip7	0.136864	0.360645	0.223781	Nip7
Prr5	0	0.223449	0.223449	Prr5
Adamts10	0.0403105	0.26372	0.22341	Adamts10
Naa50	0.289298	0.512614	0.223316	Naa50
Fkbp9	0.498468	0.721707	0.223239	Fkbp9
2310022B05Rik	0.81158	1.03463	0.223055	2310022B05Rik
Erf	0	0.223041	0.223041	Erf
Rps19bp1	0.464367	0.68698	0.222612	Rps19bp1
Abracl	0.154614	0.37713	0.222516	Abracl
Saal1	0	0.222399	0.222399	Saal1
Klhdc1	0	0.222245	0.222245	Klhdc1
Ppp3ca	0.542049	0.764219	0.22217	Ppp3ca
Col5a2	0	0.22207	0.22207	Col5a2
Elavl1	0.497952	0.719987	0.222034	Elavl1
Nudt2	0.119985	0.341792	0.221807	Nudt2
Rif1	0.0814358	0.303181	0.221745	Rif1
Rad9a	0	0.221637	0.221637	Rad9a
Adamts5	0.0403105	0.261785	0.221474	Adamts5
Cdc42bpa	0.309652	0.530969	0.221317	Cdc42bpa
Zdhhc18	0	0.221258	0.221258	Zdhhc18
Pcna	0.138426	0.359646	0.22122	Pcna
Gcdh	0.0651085	0.286068	0.22096	Gcdh
Rxrb	0	0.220916	0.220916	Rxrb
Vasp	1.41893	1.63968	0.220752	Vasp
Epm2aip1	0.0972735	0.317941	0.220667	Epm2aip1
Ttc28	0.293508	0.51405	0.220541	Ttc28
Ecscr	0.344484	0.564972	0.220488	Ecscr
Smurf2	0	0.220395	0.220395	Smurf2
Ube2v2	0.739401	0.959785	0.220385	Ube2v2
Cept1	0.327087	0.547454	0.220367	Cept1
Pigx	0.159166	0.379285	0.220118	Pigx
Setd3	0.448745	0.668836	0.220091	Setd3
Cfl2	0.733643	0.953722	0.22008	Cfl2
Dhrs3	0.311658	0.531709	0.220051	Dhrs3
Crem	0	0.219705	0.219705	Crem
Dtwd1	0	0.219685	0.219685	Dtwd1
Hic1	0.981303	1.20093	0.219625	Hic1
Gon4l	0.120748	0.340195	0.219447	Gon4l
Dmwd	0.0823293	0.301698	0.219368	Dmwd
Rps20	1.92968	2.14898	0.219301	Rps20
Kifap3	0.263754	0.483054	0.2193	Kifap3
Dhrs13	0	0.219065	0.219065	Dhrs13
Atxn7	0	0.219002	0.219002	Atxn7
2210016F16Rik	0.375983	0.594936	0.218953	2210016F16Rik
Atxn1	0.296363	0.515262	0.218899	Atxn1
Pmpca	0	0.218854	0.218854	Pmpca
Cd302	0.717021	0.935852	0.218831	Cd302
Mef2d	0.170003	0.38863	0.218626	Mef2d
Zfp248	0	0.218576	0.218576	Zfp248
2700049A03Rik	0	0.218539	0.218539	2700049A03Rik
Elob	1.92561	2.1441	0.21849	Elob
Cdc42	1.8251	2.04344	0.218332	Cdc42
Ndufaf3	0.507126	0.725433	0.218307	Ndufaf3
Papd4	0	0.2183	0.2183	Papd4
Gstk1	0.227906	0.446128	0.218222	Gstk1
Ccdc92	0	0.218218	0.218218	Ccdc92
Psmb2	1.10272	1.3209	0.218187	Psmb2
Nr2f2	1.14712	1.36529	0.218164	Nr2f2
Ccdc94	0	0.218109	0.218109	Ccdc94
Nacc1	0.0686329	0.286465	0.217832	Nacc1
Ccm2	0.207164	0.424986	0.217822	Ccm2
Sat1	0.911271	1.12889	0.217621	Sat1
Rps24	2.4364	2.65352	0.217122	Rps24
Gramd3	0	0.216949	0.216949	Gramd3
Fhod1	0	0.216948	0.216948	Fhod1
Zfp36	0.257066	0.474	0.216934	Zfp36
Dgkd	0.0403105	0.257024	0.216714	Dgkd
Phf12	0.16288	0.379491	0.216611	Phf12
Cavin1	1.88623	2.10284	0.216605	Cavin1
Rbm3	1.46243	1.67869	0.216257	Rbm3
Tsc2	0	0.216246	0.216246	Tsc2
Rpl7l1	0.39754	0.613635	0.216095	Rpl7l1
Sacm1l	0.451611	0.667683	0.216072	Sacm1l
Iqgap1	0.633759	0.849823	0.216064	Iqgap1
Bhlhe41	0.0814358	0.297342	0.215906	Bhlhe41
Fam168b	0.288964	0.504867	0.215904	Fam168b
Dock9	0.0830684	0.298916	0.215848	Dock9
Iqcc	0	0.215794	0.215794	Iqcc
Polrmt	0	0.215541	0.215541	Polrmt
Gm30075	0.296189	0.511702	0.215513	Gm30075
Sgta	0.65063	0.866068	0.215438	Sgta
Rab5b	0.343033	0.558434	0.215401	Rab5b
Arf6	0.223653	0.439016	0.215363	Arf6
Zpr1	0.1446	0.359843	0.215242	Zpr1
Nubp1	0.127857	0.343093	0.215236	Nubp1
Avpi1	0.395082	0.610309	0.215227	Avpi1
Cldn34c1	0	0.215213	0.215213	Cldn34c1
Prps1	0	0.215178	0.215178	Prps1
Rpusd3	0.0843813	0.299527	0.215146	Rpusd3
Arrb2	0	0.214702	0.214702	Arrb2
Arhgap18	0	0.214636	0.214636	Arhgap18
Recql	0	0.214511	0.214511	Recql
Fbxl6	0.0596921	0.27414	0.214448	Fbxl6
Tcaim	0.154478	0.368832	0.214354	Tcaim
Sept6	0.0567754	0.271033	0.214257	Sept6
Vps4a	0.191885	0.405651	0.213765	Vps4a
Samd10	0	0.21359	0.21359	Samd10
Rps15	2.4305	2.64398	0.213476	Rps15
Nrarp	1.01148	1.22478	0.213297	Nrarp
Fech	0.200054	0.413101	0.213047	Fech
Vti1a	0.142188	0.355207	0.213019	Vti1a
Prmt9	0	0.213001	0.213001	Prmt9
Enpp1	0	0.212871	0.212871	Enpp1
Pdk1	0	0.212748	0.212748	Pdk1
Rpl28	2.06755	2.28004	0.212492	Rpl28
Sugp2	0	0.212459	0.212459	Sugp2
Mboat7	0.0651085	0.277529	0.212421	Mboat7
Crebzf	0.0668323	0.279243	0.212411	Crebzf
Smim5	0.284656	0.496882	0.212226	Smim5
Bok	0.423338	0.635539	0.212201	Bok
Smurf1	0.0596921	0.271872	0.21218	Smurf1
Inhba	0	0.212044	0.212044	Inhba
Coa6	0.266344	0.478223	0.211879	Coa6
Cradd	0.0814358	0.293249	0.211813	Cradd
Pdpn	0	0.211577	0.211577	Pdpn
Synpo2	0.145446	0.356944	0.211499	Synpo2
Htt	0.0823293	0.293672	0.211343	Htt
Clta	1.32801	1.53935	0.211336	Clta
Nek7	0.468463	0.679587	0.211124	Nek7
Txnrd3	0	0.210987	0.210987	Txnrd3
4933406C10Rik	0	0.210962	0.210962	4933406C10Rik
Lsm14a	0.47528	0.686236	0.210956	Lsm14a
Cir1	0.261826	0.472774	0.210948	Cir1
Eef1akmt1	0.19273	0.403593	0.210863	Eef1akmt1
1810024B03Rik	0	0.210776	0.210776	1810024B03Rik
Trim47	0.055716	0.266465	0.210749	Trim47
Cdk10	0.104018	0.314765	0.210747	Cdk10
Bcl2l12	0.33931	0.549941	0.21063	Bcl2l12
Rmnd1	0.0686329	0.279218	0.210585	Rmnd1
Noa1	0	0.21058	0.21058	Noa1
Six5	0	0.210537	0.210537	Six5
Fau	2.51976	2.73023	0.210472	Fau
Bst2	0.3328	0.543264	0.210464	Bst2
Nudt21	0.353685	0.564147	0.210462	Nudt21
Nedd8	1.42498	1.63521	0.210227	Nedd8
Dph7	0.104018	0.314243	0.210225	Dph7
Uqcrfs1	0.938393	1.14856	0.210167	Uqcrfs1
1810055G02Rik	0	0.210115	0.210115	1810055G02Rik
Plekhm2	0.055716	0.265791	0.210075	Plekhm2
Smim1	0.497553	0.707444	0.209891	Smim1
Tspan2	0.12838	0.338175	0.209795	Tspan2
H2-T23	0	0.209664	0.209664	H2-T23
Rgs7bp	0.698892	0.908546	0.209654	Rgs7bp
Mynn	0.0668323	0.276398	0.209565	Mynn
Vps37c	0.119755	0.329039	0.209284	Vps37c
Rps16	2.74701	2.95629	0.20928	Rps16
Mrpl48	0.518048	0.727254	0.209207	Mrpl48
Pdpr	0	0.209185	0.209185	Pdpr
Dennd4a	0.186311	0.395495	0.209184	Dennd4a
Tpm3	0.415925	0.624888	0.208963	Tpm3
Nrgn	0.263976	0.47271	0.208735	Nrgn
Gpatch11	0.217107	0.425678	0.208571	Gpatch11
Ggt7	0.0651085	0.273589	0.208481	Ggt7
Rpl35a	2.61641	2.82483	0.208418	Rpl35a
Pxdc1	0.122221	0.330546	0.208324	Pxdc1
Wiz	0.0554048	0.263103	0.207698	Wiz
Apba1	0.0554048	0.26303	0.207626	Apba1
Camk2g	0.806404	1.014	0.207592	Camk2g
Orc5	0	0.207383	0.207383	Orc5
Atl2	0.194875	0.402253	0.207379	Atl2
Herc4	0.0942733	0.301623	0.20735	Herc4
Slc4a2	0	0.20723	0.20723	Slc4a2
Asxl1	0.0411039	0.248229	0.207125	Asxl1
Ube2l3	0.620661	0.8275	0.206839	Ube2l3
Ndufa9	0.531837	0.738389	0.206552	Ndufa9
Tesk1	0.108196	0.314684	0.206489	Tesk1
1500011B03Rik	0.13042	0.336839	0.206419	1500011B03Rik
Acss2	0.119896	0.326284	0.206388	Acss2
Rnf111	0.194327	0.400594	0.206267	Rnf111
Foxc1	0.668333	0.874397	0.206064	Foxc1
Imp4	0.0686329	0.274695	0.206062	Imp4
Ndufa2	1.97383	2.17985	0.206018	Ndufa2
Tulp4	0.299049	0.50502	0.205971	Tulp4
Chrac1	0.545993	0.751964	0.205971	Chrac1
Chst15	0	0.205918	0.205918	Chst15
Nr1d1	0.56025	0.766102	0.205852	Nr1d1
Amotl1	0.587457	0.793265	0.205808	Amotl1
Galk1	0.613283	0.819017	0.205734	Galk1
Acyp2	0.213856	0.419338	0.205482	Acyp2
Ccdc58	0	0.205441	0.205441	Ccdc58
Smim4	0.259267	0.464471	0.205203	Smim4
Stam	0	0.2052	0.2052	Stam
Sbsn	0.113264	0.318426	0.205162	Sbsn
Rnf138	0.480075	0.685211	0.205136	Rnf138
Fam58b	0.324141	0.529175	0.205034	Fam58b
H2-Q4	0	0.204932	0.204932	H2-Q4
Mrps16	0.578099	0.782973	0.204874	Mrps16
Med10	0.352032	0.556869	0.204838	Med10
Ctsa	0.687131	0.891754	0.204623	Ctsa
Arhgef2	0.334631	0.539187	0.204556	Arhgef2
Eme2	0	0.204418	0.204418	Eme2
Ankrd37	0.0561214	0.260421	0.2043	Ankrd37
Stau2	0	0.204151	0.204151	Stau2
Gpr153	0.0823293	0.286378	0.204048	Gpr153
Eif3f	1.35686	1.56074	0.20388	Eif3f
Ssu72	1.00343	1.2072	0.203772	Ssu72
Eif2b4	0.137431	0.341181	0.203749	Eif2b4
Scyl3	0.123841	0.327519	0.203679	Scyl3
Zbtb17	0	0.203666	0.203666	Zbtb17
Med13	0.117832	0.321476	0.203645	Med13
Supt5	0.154614	0.358104	0.20349	Supt5
4930523C07Rik	1.25318	1.45658	0.203404	4930523C07Rik
Srsf5	1.67657	1.87978	0.203209	Srsf5
Cln3	0	0.203086	0.203086	Cln3
Cbx3	0.706187	0.909083	0.202897	Cbx3
Slc16a11	0.634609	0.837335	0.202725	Slc16a11
Atg4a	0.202757	0.40524	0.202483	Atg4a
Rps6ka4	0.439151	0.641593	0.202442	Rps6ka4
Ptprm	0.134466	0.336903	0.202436	Ptprm
Tmed5	0.227258	0.429504	0.202246	Tmed5
Ap4s1	0.351816	0.554057	0.202242	Ap4s1
Ccdc3	0.168827	0.370885	0.202057	Ccdc3
Hpf1	0.699396	0.90133	0.201934	Hpf1
Gapvd1	0.228312	0.430207	0.201895	Gapvd1
Ubac2	0.0935836	0.295404	0.20182	Ubac2
Psmd10	0.252863	0.45461	0.201746	Psmd10
Zbtb2	0.0403105	0.241801	0.20149	Zbtb2
Rps9	2.31363	2.5149	0.201272	Rps9
Ttc3	0.467093	0.668324	0.201232	Ttc3
R3hdm4	0.487104	0.688289	0.201185	R3hdm4
Mertk	0.284926	0.485806	0.20088	Mertk
Blcap	0.228455	0.429245	0.20079	Blcap
Ccdc167	0	0.200661	0.200661	Ccdc167
Nrip2	1.18575	1.38638	0.20063	Nrip2
Vps45	0.1105	0.311019	0.200519	Vps45
Scap	0	0.200443	0.200443	Scap
Gadd45gip1	0.494688	0.694934	0.200246	Gadd45gip1
Ptpn9	0.53117	0.731376	0.200207	Ptpn9
Stxbp1	0.178422	0.378232	0.19981	Stxbp1
Chmp1b	0.180397	0.380162	0.199765	Chmp1b
Gm20696	0	0.199719	0.199719	Gm20696
Phtf1	0	0.199716	0.199716	Phtf1
Wdfy1	0	0.199695	0.199695	Wdfy1
Dyrk1b	0	0.199655	0.199655	Dyrk1b
Il33	0.0666878	0.266112	0.199424	Il33
Chst12	0.0651085	0.264524	0.199415	Chst12
Bbs9	0	0.199327	0.199327	Bbs9
Rundc3a	0	0.199305	0.199305	Rundc3a
Nuf2	0	0.199211	0.199211	Nuf2
Cap1	0.394219	0.593381	0.199162	Cap1
Gsn	1.21002	1.40913	0.199113	Gsn
Grsf1	0.0651085	0.264157	0.199049	Grsf1
Rilpl1	0.247766	0.446702	0.198935	Rilpl1
Bod1l	0.908523	1.10739	0.198867	Bod1l
Ift57	0.232185	0.431014	0.198828	Ift57
Sap18	0.538093	0.736904	0.198811	Sap18
Btf3	1.88827	2.08697	0.198709	Btf3
Myl12b	1.21614	1.41478	0.198635	Myl12b
Tmem158	0	0.198627	0.198627	Tmem158
Sdha	1.11697	1.31543	0.198459	Sdha
Cbx7	0.136864	0.335323	0.198459	Cbx7
Nudt5	0.298988	0.497385	0.198396	Nudt5
St3gal2	0.104018	0.302267	0.198249	St3gal2
March6	0.586153	0.784298	0.198145	March6
Appl2	0	0.197495	0.197495	Appl2
Ptbp3	0.360925	0.55837	0.197445	Ptbp3
Msl1	0.487062	0.684487	0.197425	Msl1
Mib1	0.162208	0.359595	0.197388	Mib1
Tubgcp3	0.0843813	0.281709	0.197328	Tubgcp3
Cystm1	1.50738	1.70467	0.197296	Cystm1
Vps41	0.178167	0.375401	0.197234	Vps41
Mief2	0	0.197077	0.197077	Mief2
Eif1ax	0.612093	0.808875	0.196782	Eif1ax
Eif4e2	0.142138	0.338909	0.196771	Eif4e2
Tmcc2	0	0.196749	0.196749	Tmcc2
Pdhb	0.586989	0.783702	0.196713	Pdhb
Tmem126a	0.388766	0.585414	0.196648	Tmem126a
Sdr39u1	0	0.196568	0.196568	Sdr39u1
Wdr20	0	0.196314	0.196314	Wdr20
Rnf7	1.19404	1.39017	0.196133	Rnf7
Dhx58os	0.569612	0.765631	0.196019	Dhx58os
Gpr137b	0.193132	0.389029	0.195897	Gpr137b
2810405F17Rik	0	0.195808	0.195808	2810405F17Rik
Man2a2	0.1269	0.322665	0.195765	Man2a2
Rpl13a-ps1	1.07518	1.27074	0.195558	Rpl13a-ps1
Chpf	0.270809	0.466281	0.195472	Chpf
Abhd5	0.0977106	0.293177	0.195467	Abhd5
Anp32e	0.473807	0.668902	0.195095	Anp32e
Paox	0	0.195075	0.195075	Paox
Inpp4a	0.255941	0.450789	0.194848	Inpp4a
Gm10053	0.207353	0.402025	0.194672	Gm10053
Igfbp4	0.48321	0.677853	0.194643	Igfbp4
Fbxl4	0	0.194616	0.194616	Fbxl4
Hmgn1	1.44213	1.6367	0.194571	Hmgn1
Commd1	0.696723	0.891266	0.194543	Commd1
Tead3	0	0.19453	0.19453	Tead3
Kpna4	0.304687	0.499182	0.194495	Kpna4
H2-Ab1	0	0.194222	0.194222	H2-Ab1
Fads1	0	0.194222	0.194222	Fads1
Dync2li1	0.157092	0.351283	0.194191	Dync2li1
Nsfl1c	0.667156	0.861317	0.194161	Nsfl1c
Timm13	1.07396	1.2681	0.19414	Timm13
Kpna1	0.236501	0.430196	0.193696	Kpna1
Serpine2	1.11298	1.30664	0.193667	Serpine2
Trappc10	0	0.193645	0.193645	Trappc10
Tmem41b	0.229832	0.423418	0.193585	Tmem41b
Bcl9	0.0403105	0.233734	0.193423	Bcl9
Tram2	0.0830684	0.276412	0.193343	Tram2
Cks1b	0.0823293	0.275591	0.193262	Cks1b
Plcd3	0	0.193155	0.193155	Plcd3
Mrpl46	0.238653	0.431765	0.193112	Mrpl46
Rnf126	0.118747	0.311832	0.193085	Rnf126
Gpx4	2.1443	2.33726	0.192963	Gpx4
Itpa	0.526428	0.719303	0.192876	Itpa
Odc1	0.434567	0.62743	0.192864	Odc1
C1qtnf6	0.136864	0.329699	0.192834	C1qtnf6
Mrnip	0	0.192807	0.192807	Mrnip
Tgfbr3	0.151112	0.343554	0.192442	Tgfbr3
Sco1	0	0.192437	0.192437	Sco1
Rps2	2.13357	2.32589	0.192315	Rps2
Ccnt1	0.246724	0.438937	0.192213	Ccnt1
Lrfn4	0	0.192115	0.192115	Lrfn4
Atp5d	1.72068	1.91274	0.192064	Atp5d
Ruvbl2	0.321038	0.513098	0.19206	Ruvbl2
Fxyd1	1.98856	2.18061	0.192048	Fxyd1
Scd1	0	0.191952	0.191952	Scd1
Obsl1	0.0823293	0.274269	0.19194	Obsl1
Ldb3	0.134168	0.326051	0.191883	Ldb3
Mpc2	1.02575	1.21749	0.19174	Mpc2
Vasn	0.76229	0.954006	0.191716	Vasn
Icosl	0	0.191573	0.191573	Icosl
Tmem60	0.359587	0.551094	0.191508	Tmem60
Spry1	0.326636	0.518022	0.191386	Spry1
A430005L14Rik	0.391141	0.582392	0.191252	A430005L14Rik
Ddx39	0.0567754	0.247913	0.191138	Ddx39
Dgcr2	0.171434	0.362448	0.191014	Dgcr2
Sox13	0.0561214	0.247096	0.190974	Sox13
Nsun6	0.0972735	0.288239	0.190966	Nsun6
Clasrp	0	0.19093	0.19093	Clasrp
Patl1	0.0972735	0.288003	0.190729	Patl1
Neu1	0.330152	0.520718	0.190567	Neu1
Mafb	0	0.190566	0.190566	Mafb
Nxn	0	0.190531	0.190531	Nxn
Vkorc1	0.739084	0.929608	0.190524	Vkorc1
Ephx2	0	0.190452	0.190452	Ephx2
Slc39a1	0.484509	0.674928	0.190419	Slc39a1
Nif3l1	0.12174	0.31214	0.1904	Nif3l1
H2-Ke6	0.251651	0.442003	0.190352	H2-Ke6
Pofut1	0	0.190302	0.190302	Pofut1
Nrp2	0	0.190199	0.190199	Nrp2
Styx	0.0403105	0.230285	0.189975	Styx
Ptk7	0.134466	0.32427	0.189804	Ptk7
Samd4	0.215131	0.40493	0.189799	Samd4
Pa2g4	0.551082	0.740848	0.189767	Pa2g4
Trip6	0.416989	0.606734	0.189746	Trip6
Cdyl2	0.0814358	0.270979	0.189544	Cdyl2
Agpat3	0.146785	0.33626	0.189475	Agpat3
Chd1	0.277621	0.467009	0.189388	Chd1
Vamp7	0.163785	0.353092	0.189307	Vamp7
Pygo1	0	0.189196	0.189196	Pygo1
Rps27l	1.48646	1.67563	0.189168	Rps27l
Mtf2	0.0915317	0.280651	0.189119	Mtf2
Mis18a	0.0657405	0.254652	0.188911	Mis18a
Ckap4	0.0651085	0.253987	0.188878	Ckap4
Lrsam1	0.0411039	0.229959	0.188855	Lrsam1
Ppih	0	0.188703	0.188703	Ppih
Tmem189	0	0.188568	0.188568	Tmem189
Gm11361	0.176232	0.364745	0.188513	Gm11361
Selenot	0.54606	0.734481	0.188421	Selenot
Pcmtd2	0.294082	0.482443	0.188361	Pcmtd2
Gnb2	1.69686	1.88513	0.188262	Gnb2
Gpsm3	0.537704	0.725739	0.188035	Gpsm3
Sh3gl1	0.0915317	0.279539	0.188007	Sh3gl1
Bmp1	0	0.187965	0.187965	Bmp1
Parp9	0.154366	0.34221	0.187844	Parp9
Lin37	0.273784	0.461552	0.187768	Lin37
Ppp6r2	0.200692	0.388409	0.187717	Ppp6r2
Acsf2	0.123841	0.311445	0.187605	Acsf2
Itpripl2	0.179036	0.366563	0.187528	Itpripl2
Sfxn3	0.216518	0.40401	0.187492	Sfxn3
Stau1	0.405273	0.592667	0.187394	Stau1
Nxt2	0.0403105	0.227676	0.187365	Nxt2
Pfn2	0.0596921	0.246892	0.187199	Pfn2
Med7	0.210204	0.39737	0.187166	Med7
Atpaf1	0.201142	0.388302	0.18716	Atpaf1
Coq9	0.160243	0.347351	0.187108	Coq9
Vps11	0.211755	0.398861	0.187106	Vps11
Abtb2	0.0561214	0.243215	0.187094	Abtb2
Ctsf	0.0938831	0.280956	0.187073	Ctsf
Cpsf7	0.29063	0.47769	0.18706	Cpsf7
Ndufa5	1.65126	1.83823	0.186972	Ndufa5
Abcd2	0	0.186784	0.186784	Abcd2
Pdxk	0.249511	0.436175	0.186664	Pdxk
Cisd2	0.524951	0.711548	0.186597	Cisd2
Swt1	0.453578	0.640073	0.186495	Swt1
Cmc1	0.141475	0.32785	0.186375	Cmc1
Wdr5	0	0.186356	0.186356	Wdr5
Tlcd1	0.0668323	0.253188	0.186355	Tlcd1
Cntln	0	0.186321	0.186321	Cntln
Fam208b	0	0.186259	0.186259	Fam208b
Glod4	0.404055	0.590288	0.186233	Glod4
Asnsd1	0.105802	0.291984	0.186182	Asnsd1
Tufm	0	0.186128	0.186128	Tufm
Prrc2b	0.429073	0.615187	0.186114	Prrc2b
Gm10827	0	0.186003	0.186003	Gm10827
Krr1	0.102925	0.288798	0.185872	Krr1
Ube2g1	0.288132	0.473887	0.185755	Ube2g1
Gpank1	0	0.185741	0.185741	Gpank1
Unc45a	0.679989	0.865725	0.185735	Unc45a
Gatsl3	0.0972735	0.282949	0.185675	Gatsl3
Cltc	0.619133	0.804725	0.185593	Cltc
Rpl18	2.08406	2.26963	0.185575	Rpl18
Gm16124	0	0.18543	0.18543	Gm16124
Atp6v1a	0.475819	0.661228	0.185409	Atp6v1a
BC051226	0	0.185287	0.185287	BC051226
Ndufs2	1.35902	1.54421	0.185197	Ndufs2
Elp2	0	0.185194	0.185194	Elp2
Ttc5	0.347135	0.532245	0.185109	Ttc5
Eno1	0.942172	1.12697	0.1848	Eno1
Ago3	0.112263	0.296959	0.184696	Ago3
Sys1	0.827688	1.01198	0.184288	Sys1
Psmb5	0.997271	1.18152	0.184253	Psmb5
Mrpl36	0.530915	0.715005	0.18409	Mrpl36
Pold2	0.0946352	0.278669	0.184034	Pold2
Glmp	0.417276	0.601304	0.184028	Glmp
Uba7	0	0.184003	0.184003	Uba7
Arpc2	1.26448	1.44846	0.183985	Arpc2
Hmox2	0.361196	0.545134	0.183938	Hmox2
Serbp1	1.23108	1.41493	0.183848	Serbp1
Glis2	0.0403105	0.223826	0.183515	Glis2
Lmna	1.26891	1.4524	0.183495	Lmna
Gtf2f2	0.0666878	0.250055	0.183368	Gtf2f2
Grhpr	0.155818	0.339151	0.183333	Grhpr
Ing3	0.288807	0.472059	0.183252	Ing3
Ociad1	0.969977	1.15317	0.183195	Ociad1
Mcts1	0.364731	0.547911	0.183179	Mcts1
Limd1	0.93409	1.11707	0.182977	Limd1
Fam126b	0.10519	0.288144	0.182954	Fam126b
Ints6l	0	0.182922	0.182922	Ints6l
Pld1	0.451464	0.634275	0.182811	Pld1
Gm11627	0.192929	0.375717	0.182788	Gm11627
Rhno1	0.0554048	0.238109	0.182704	Rhno1
Foxp1	0.749312	0.931708	0.182396	Foxp1
Sncg	1.71589	1.89819	0.182302	Sncg
Gng11	2.70991	2.89209	0.182183	Gng11
Pet100	0.440002	0.622045	0.182044	Pet100
Hnrnpu	1.26541	1.44744	0.182032	Hnrnpu
Araf	0.530164	0.712141	0.181976	Araf
Sdcbp	0.621329	0.80321	0.181881	Sdcbp
Cadm1	0.171587	0.3534	0.181814	Cadm1
Atpaf2	0.0561214	0.237865	0.181743	Atpaf2
Nup155	0	0.181695	0.181695	Nup155
Tmem199	0.254323	0.435992	0.181669	Tmem199
Atp9a	0	0.181588	0.181588	Atp9a
Mrpl44	0.353505	0.535037	0.181531	Mrpl44
Adm	0.294909	0.476431	0.181522	Adm
Fam103a1	0.708862	0.890247	0.181385	Fam103a1
Ggact	0.126236	0.307538	0.181302	Ggact
Myadm	0.600808	0.78195	0.181142	Myadm
Fxyd5	0.258625	0.439691	0.181065	Fxyd5
Dst	0.890734	1.07176	0.18103	Dst
Srrd	0.13042	0.31145	0.18103	Srrd
Ciz1	0	0.180821	0.180821	Ciz1
Proser1	0.0651085	0.245825	0.180716	Proser1
Ndufb6	1.15082	1.33147	0.180658	Ndufb6
Nek8	0	0.180392	0.180392	Nek8
Id1	0.745683	0.926026	0.180343	Id1
Trip12	0.368596	0.548783	0.180187	Trip12
Scmh1	0.137585	0.317717	0.180132	Scmh1
Klhl9	0.419918	0.599936	0.180018	Klhl9
Plxnb2	0.485701	0.665714	0.180013	Plxnb2
Rhebl1	0	0.179957	0.179957	Rhebl1
Xkr8	0	0.179938	0.179938	Xkr8
Tsen2	0.134638	0.314459	0.179822	Tsen2
Ccdc86	0.22296	0.40266	0.179701	Ccdc86
Cpt1a	0.171785	0.351442	0.179658	Cpt1a
Cdk12	0.420124	0.599728	0.179604	Cdk12
Il13ra1	0.589198	0.768761	0.179564	Il13ra1
Gemin7	0.663103	0.842612	0.179509	Gemin7
Ube2a	0.509892	0.68938	0.179488	Ube2a
Sap18b	0.642382	0.821803	0.179421	Sap18b
Stx6	0.158095	0.337505	0.179409	Stx6
Cttn	0.29061	0.47	0.17939	Cttn
Myo5a	0	0.179118	0.179118	Myo5a
Dennd4c	0	0.178886	0.178886	Dennd4c
Gabpb1	0	0.178819	0.178819	Gabpb1
Mnat1	0.513635	0.692416	0.17878	Mnat1
Megf9	0	0.178617	0.178617	Megf9
H2afy	0.689665	0.86825	0.178585	H2afy
9130401M01Rik	0.154701	0.333282	0.178582	9130401M01Rik
Casp6	0.0949028	0.273481	0.178578	Casp6
Lamb2	1.28217	1.46067	0.178494	Lamb2
Plcg1	0.055716	0.234207	0.17849	Plcg1
Nfkbib	0.210649	0.38913	0.178481	Nfkbib
Plekha2	0.588778	0.767205	0.178427	Plekha2
Exosc2	0	0.178278	0.178278	Exosc2
Hmgcr	0.0686329	0.246865	0.178232	Hmgcr
Zfp768	0.180699	0.358739	0.17804	Zfp768
Cyp2d22	0	0.178036	0.178036	Cyp2d22
Gatad1	0.381672	0.559682	0.17801	Gatad1
Rars2	0.0823293	0.260333	0.178004	Rars2
Nek4	0	0.177932	0.177932	Nek4
Spock2	0	0.177862	0.177862	Spock2
Stx18	0.127857	0.305503	0.177645	Stx18
Znrd1as	0.165888	0.343497	0.177609	Znrd1as
Rufy1	0.126236	0.303801	0.177565	Rufy1
Hsdl1	0.0668323	0.244246	0.177414	Hsdl1
Smg8	0	0.177385	0.177385	Smg8
Pml	0	0.177122	0.177122	Pml
Spg21	0.4265	0.603608	0.177107	Spg21
Cys1	0.287996	0.465054	0.177059	Cys1
Tubb2b	0.61361	0.790654	0.177044	Tubb2b
Ltbp4	0.164701	0.341714	0.177013	Ltbp4
Trub2	0	0.176955	0.176955	Trub2
Pms2	0.105802	0.282686	0.176883	Pms2
Hmgb3	0.055716	0.232596	0.17688	Hmgb3
Fam174b	0	0.17679	0.17679	Fam174b
Nudt9	0.426672	0.603385	0.176713	Nudt9
Ethe1	0.224171	0.400846	0.176674	Ethe1
Rcc2	0.0411039	0.217686	0.176582	Rcc2
Slc9a3r2	1.23011	1.40666	0.176554	Slc9a3r2
Tpm2	2.97133	3.14786	0.176532	Tpm2
Rps11	2.39692	2.57344	0.176514	Rps11
Tinagl1	1.59849	1.775	0.176505	Tinagl1
Pqlc1	0	0.176503	0.176503	Pqlc1
Emsy	0.286648	0.463114	0.176466	Emsy
Selenow	2.39233	2.56872	0.176394	Selenow
Mrpl37	0.0668323	0.2432	0.176367	Mrpl37
Ldlrad4	0.0666878	0.242834	0.176146	Ldlrad4
Ccdc28a	0.0666878	0.24266	0.175972	Ccdc28a
Rnase4	0.145835	0.321802	0.175967	Rnase4
Wdpcp	0	0.175773	0.175773	Wdpcp
Gm15998	0.0561214	0.231589	0.175468	Gm15998
Rpl36	2.47427	2.64963	0.175364	Rpl36
Nadk	0.361063	0.536323	0.175261	Nadk
B2m	1.54057	1.71583	0.175255	B2m
Ercc1	0.271462	0.446675	0.175212	Ercc1
Zc3h6	0.0818198	0.257014	0.175194	Zc3h6
Tmtc4	0.0403105	0.215463	0.175152	Tmtc4
Rpain	0.210455	0.385592	0.175137	Rpain
Pgm1	0.100333	0.275348	0.175015	Pgm1
Capzb	1.63616	1.8111	0.174938	Capzb
BC003965	0.370289	0.545194	0.174905	BC003965
Col4a1	0.967803	1.14269	0.174886	Col4a1
Hnrnpd	0.29068	0.465469	0.174789	Hnrnpd
Nans	0.193338	0.368126	0.174788	Nans
Tmem250-ps	0.650454	0.825232	0.174778	Tmem250-ps
Sulf2	0	0.174638	0.174638	Sulf2
Cmss1	0.586023	0.760535	0.174512	Cmss1
Nacc2	0.10988	0.284289	0.174409	Nacc2
Phf1	0.572701	0.747028	0.174327	Phf1
Dhdds	0.0596921	0.234009	0.174317	Dhdds
Med12l	0	0.17425	0.17425	Med12l
Armc1	0.45361	0.627833	0.174222	Armc1
Gm6563	0	0.174029	0.174029	Gm6563
Tbc1d12	0.0686329	0.242622	0.173989	Tbc1d12
Man2b2	0	0.17394	0.17394	Man2b2
Dtx3l	0	0.17389	0.17389	Dtx3l
Fnip1	0.0843813	0.258245	0.173864	Fnip1
Lrrc4c	0.0561214	0.229912	0.17379	Lrrc4c
Cope	1.0344	1.20811	0.173712	Cope
Snrk	1.03852	1.21221	0.173688	Snrk
Pex5	0.187265	0.360895	0.17363	Pex5
Klf16	0	0.173552	0.173552	Klf16
Arnt	0.0657405	0.239279	0.173538	Arnt
Fam107b	0.460967	0.634453	0.173486	Fam107b
Akap17b	0.0403105	0.213725	0.173415	Akap17b
B9d2	0.233999	0.407208	0.173209	B9d2
Arrdc3	0.178505	0.351693	0.173187	Arrdc3
Slc35b2	0.263153	0.436282	0.173129	Slc35b2
Tfb1m	0	0.17306	0.17306	Tfb1m
Kifc2	0.0651085	0.238109	0.173	Kifc2
Mrps22	0	0.17299	0.17299	Mrps22
Ap2s1	0.96471	1.13768	0.172972	Ap2s1
Brat1	0	0.172794	0.172794	Brat1
Atp10a	0	0.172701	0.172701	Atp10a
Ece1	0.880838	1.05338	0.172542	Ece1
Adnp2	0	0.172422	0.172422	Adnp2
Rev3l	0	0.172417	0.172417	Rev3l
Phf10	0.0403105	0.212676	0.172366	Phf10
Ppp1cb	1.41627	1.58862	0.172343	Ppp1cb
Rasa3	0.0668323	0.239154	0.172321	Rasa3
Iqcb1	0.160854	0.333148	0.172295	Iqcb1
Col4a5	0.287001	0.459272	0.172271	Col4a5
Tug1	0.276875	0.448912	0.172037	Tug1
Zcchc14	0.119512	0.291545	0.172033	Zcchc14
Sfr1	0.980907	1.15293	0.17202	Sfr1
Traf3	0	0.17201	0.17201	Traf3
Grk2	0	0.171937	0.171937	Grk2
Itgb5	0.812843	0.98473	0.171886	Itgb5
Usp46	0	0.171869	0.171869	Usp46
Porcn	0	0.17182	0.17182	Porcn
Selenos	0.795938	0.967595	0.171657	Selenos
Cenpq	0	0.171371	0.171371	Cenpq
Ufl1	0.311943	0.483306	0.171363	Ufl1
Mtr	0	0.171356	0.171356	Mtr
Gdi1	0.759746	0.930972	0.171226	Gdi1
Trim9	0	0.171208	0.171208	Trim9
Ptpn12	0.0554048	0.226585	0.17118	Ptpn12
Sirt2	0.829911	1.00105	0.17114	Sirt2
Maged2	0.774382	0.945445	0.171063	Maged2
Ppm1l	0.460787	0.631841	0.171054	Ppm1l
Zkscan4	0	0.171046	0.171046	Zkscan4
Cnot7	0.162613	0.333652	0.171039	Cnot7
Polr2a	0.198618	0.369448	0.17083	Polr2a
Fam222b	0.0651085	0.235842	0.170733	Fam222b
Serpinb6a	0.743939	0.914643	0.170704	Serpinb6a
Phf23	0.196505	0.36706	0.170556	Phf23
H3f3a	2.16281	2.33335	0.170539	H3f3a
Stt3b	0.442554	0.613055	0.170501	Stt3b
Tnik	0	0.170438	0.170438	Tnik
Sod3	1.81719	1.98754	0.17035	Sod3
Sdhaf2	0.14314	0.313483	0.170344	Sdhaf2
Narfl	0	0.170192	0.170192	Narfl
Dmp1	0	0.170097	0.170097	Dmp1
2310039H08Rik	0.463258	0.633273	0.170015	2310039H08Rik
Dpy19l3	0	0.169994	0.169994	Dpy19l3
Cyp51	0.179351	0.349319	0.169968	Cyp51
Epas1	1.6895	1.85944	0.169939	Epas1
Aff1	0.0411039	0.211002	0.169898	Aff1
Cnpy4	0	0.169893	0.169893	Cnpy4
Birc2	0.0651085	0.234976	0.169867	Birc2
Neurl2	0.0567754	0.226522	0.169746	Neurl2
Setd6	0	0.169723	0.169723	Setd6
Sorbs1	1.20733	1.37694	0.169614	Sorbs1
Aes	0.793928	0.963362	0.169434	Aes
Tasp1	0.0651085	0.234482	0.169374	Tasp1
Kiz	0.0666878	0.236059	0.169371	Kiz
Bbip1	0.348411	0.517778	0.169367	Bbip1
Lmtk2	0	0.169328	0.169328	Lmtk2
Slc12a6	0	0.169189	0.169189	Slc12a6
Otub1	0.40652	0.575702	0.169182	Otub1
Ccz1	0.2027	0.371879	0.169179	Ccz1
Fjx1	0.185805	0.354778	0.168972	Fjx1
Msl3l2	0.119896	0.288715	0.168819	Msl3l2
Cops3	0.234525	0.403274	0.168749	Cops3
Cpne2	0.403023	0.571765	0.168742	Cpne2
Dmap1	0.20734	0.376081	0.16874	Dmap1
Rcan1	0	0.168716	0.168716	Rcan1
Cox8a	2.93807	3.10665	0.168582	Cox8a
Anxa6	0.582385	0.75085	0.168466	Anxa6
Zmat5	0.516088	0.684542	0.168454	Zmat5
Slc25a29	0.10437	0.272823	0.168453	Slc25a29
Klf9	1.08999	1.25843	0.168441	Klf9
Ppil2	0.361299	0.52969	0.168391	Ppil2
Ergic1	0.0666878	0.235061	0.168373	Ergic1
Ccrl2	0.500654	0.66901	0.168356	Ccrl2
Zfp655	0.15158	0.319934	0.168354	Zfp655
Nfyc	0.182178	0.350522	0.168344	Nfyc
Hspa1b	0	0.168214	0.168214	Hspa1b
Kcnip3	0	0.168123	0.168123	Kcnip3
Zbtb22	0.0411039	0.20921	0.168106	Zbtb22
Haghl	0.576355	0.744372	0.168016	Haghl
Atg10	0	0.167842	0.167842	Atg10
Tmem258	0.861799	1.0296	0.167805	Tmem258
Atp5k	1.64095	1.80854	0.167593	Atp5k
Fbxo42	0	0.167459	0.167459	Fbxo42
Gm49336	0	0.167418	0.167418	Gm49336
Zfp628	0	0.167404	0.167404	Zfp628
Coa4	0	0.167347	0.167347	Coa4
Ophn1	0	0.167159	0.167159	Ophn1
Tmem184c	0.106452	0.27354	0.167088	Tmem184c
Traf5	0.112263	0.279337	0.167074	Traf5
Pom121	0.0567754	0.223826	0.16705	Pom121
Naca	2.05565	2.22266	0.167008	Naca
Retreg1	0.0823293	0.249214	0.166884	Retreg1
Rcn2	1.10983	1.27671	0.166878	Rcn2
Jph2	0.270187	0.437004	0.166817	Jph2
Zmym5	0.303006	0.469631	0.166625	Zmym5
Rpl7a	1.51484	1.68144	0.166606	Rpl7a
Rnf213	0	0.166564	0.166564	Rnf213
Ankrd28	0	0.166533	0.166533	Ankrd28
Spata6	0.155326	0.321858	0.166533	Spata6
Fbxo6	0.282463	0.448978	0.166516	Fbxo6
Uqcrc1	1.27834	1.44477	0.166438	Uqcrc1
Add3	0.241572	0.408003	0.166431	Add3
Stx2	0	0.166395	0.166395	Stx2
Rev1	0	0.166385	0.166385	Rev1
Chd3	0.629895	0.796252	0.166357	Chd3
Gnpat	0.0403105	0.20665	0.166339	Gnpat
Ppat	0.0843813	0.250679	0.166298	Ppat
Malt1	0.0972735	0.263452	0.166179	Malt1
Slit3	0.0818198	0.247952	0.166132	Slit3
Ndufaf6	0	0.166128	0.166128	Ndufaf6
Ggh	0.447554	0.613636	0.166081	Ggh
Yipf6	0	0.166069	0.166069	Yipf6
Myo1d	0	0.166045	0.166045	Myo1d
Cd320	0.0596921	0.225735	0.166043	Cd320
Hint3	0.118998	0.284945	0.165947	Hint3
Itgb1bp1	0.374145	0.539974	0.165828	Itgb1bp1
Cyfip2	0.104018	0.269843	0.165825	Cyfip2
1700003F12Rik	0	0.165405	0.165405	1700003F12Rik
Cep57l1	0	0.165365	0.165365	Cep57l1
Evi2a	0	0.165231	0.165231	Evi2a
Tmem120a	0	0.165209	0.165209	Tmem120a
Tspan15	0.591587	0.756785	0.165197	Tspan15
Ikbkap	0	0.165194	0.165194	Ikbkap
Rpl10-ps3	2.18809	2.35312	0.165026	Rpl10-ps3
Slf2	0.0814358	0.246306	0.16487	Slf2
Gm42067	0	0.164806	0.164806	Gm42067
Tmem234	0.960911	1.1257	0.164788	Tmem234
Slc25a44	0	0.164671	0.164671	Slc25a44
Tmed10	1.32113	1.48563	0.164503	Tmed10
Pdcd11	0.0830684	0.247522	0.164454	Pdcd11
Coprs	0.0561214	0.220519	0.164397	Coprs
Gypc	0.846602	1.01089	0.164291	Gypc
C1d	0.755266	0.919547	0.16428	C1d
Ttc1	0.463651	0.627871	0.16422	Ttc1
Bmp6	0.0651085	0.229325	0.164216	Bmp6
Atp6v1d	0.618006	0.782189	0.164183	Atp6v1d
Cnot10	0.190492	0.354635	0.164143	Cnot10
Fmnl3	0.151994	0.316045	0.164051	Fmnl3
Comt	1.66428	1.82826	0.163978	Comt
C030034I22Rik	0.0823293	0.246306	0.163976	C030034I22Rik
Endov	0.0596921	0.223648	0.163956	Endov
Snip1	0	0.163935	0.163935	Snip1
Gid4	0.179225	0.343073	0.163848	Gid4
Atp5l	2.17562	2.33943	0.163811	Atp5l
Srsf3	1.43437	1.59796	0.163585	Srsf3
Pcnt	0.0915317	0.255101	0.163569	Pcnt
Grb10	0.573965	0.737415	0.16345	Grb10
Ogdh	0.509909	0.673288	0.163379	Ogdh
Slc2a4	0.352633	0.515993	0.16336	Slc2a4
Mrpl19	0.151112	0.314423	0.163312	Mrpl19
Gdap2	0	0.163149	0.163149	Gdap2
Cactin	0.135415	0.29855	0.163135	Cactin
Rexo2	0.593384	0.756405	0.16302	Rexo2
Sf3b3	0.520301	0.683283	0.162982	Sf3b3
Tnks2	0.0823293	0.244973	0.162644	Tnks2
Tsnax	0.464661	0.627245	0.162584	Tsnax
AU022252	0	0.162377	0.162377	AU022252
Rrp15	0	0.162343	0.162343	Rrp15
Usp38	0	0.162338	0.162338	Usp38
Bax	0.817898	0.980194	0.162296	Bax
Sppl2b	0	0.162186	0.162186	Sppl2b
Cyp46a1	0	0.161958	0.161958	Cyp46a1
Tnfaip8	0.516275	0.678178	0.161903	Tnfaip8
Klf15	0.0818198	0.243659	0.161839	Klf15
Vps18	0.0915317	0.25319	0.161658	Vps18
Ormdl2	0.137585	0.299172	0.161587	Ormdl2
Gm34788	0	0.161529	0.161529	Gm34788
Ykt6	0	0.161394	0.161394	Ykt6
Sh3gl3	0	0.161256	0.161256	Sh3gl3
Cpxm1	0	0.161251	0.161251	Cpxm1
Haus2	0	0.161219	0.161219	Haus2
Naf1	0	0.161191	0.161191	Naf1
Mal2	0	0.161177	0.161177	Mal2
Gm49359	0.184468	0.345611	0.161144	Gm49359
Arhgap17	0	0.161027	0.161027	Arhgap17
Anapc11	1.0789	1.23976	0.160862	Anapc11
Nudcd3	0.44241	0.60296	0.160549	Nudcd3
Atpif1	1.65647	1.81699	0.160517	Atpif1
Snx17	0.704481	0.864792	0.16031	Snx17
Csdc2	0.133885	0.29401	0.160125	Csdc2
Accs	0	0.159987	0.159987	Accs
Cnot6	0	0.159961	0.159961	Cnot6
mt-Nd4	3.45528	3.61507	0.159792	mt-Nd4
Rtl6	0	0.159759	0.159759	Rtl6
Stk40	0.0938831	0.253638	0.159755	Stk40
Rab36	0	0.159691	0.159691	Rab36
Kcna5	0.215329	0.374941	0.159612	Kcna5
Megf8	0.167603	0.327183	0.15958	Megf8
Plcb3	0	0.159423	0.159423	Plcb3
Gm17634	0.126236	0.285523	0.159287	Gm17634
Eif5a	1.68144	1.84057	0.159135	Eif5a
Zfp322a	0.370407	0.529526	0.159119	Zfp322a
Ptges2	0.128606	0.287704	0.159098	Ptges2
Ankrd12	0.795936	0.954957	0.159022	Ankrd12
Cdkn2c	0.230983	0.389923	0.15894	Cdkn2c
Npm3	0.337392	0.496212	0.15882	Npm3
Ccdc71l	0	0.158818	0.158818	Ccdc71l
Rhobtb2	0	0.158767	0.158767	Rhobtb2
Ccdc34	0.343285	0.501987	0.158702	Ccdc34
Tcf7l1	0.0686329	0.227241	0.158608	Tcf7l1
Kdm5b	0.127425	0.285781	0.158356	Kdm5b
Fmc1	0.882992	1.0413	0.15831	Fmc1
Abca8a	0.0823293	0.240625	0.158295	Abca8a
Eva1b	1.99099	2.14907	0.158081	Eva1b
Stx5a	0.468107	0.62604	0.157933	Stx5a
Cdadc1	0.321532	0.47942	0.157888	Cdadc1
Afdn	0.103534	0.261343	0.157809	Afdn
Gm26853	0	0.157803	0.157803	Gm26853
Rrp9	0.181335	0.339135	0.1578	Rrp9
Safb2	0.259048	0.416819	0.157772	Safb2
Polr1a	0.0411039	0.198754	0.15765	Polr1a
Dnajc7	0.562989	0.720622	0.157633	Dnajc7
AL589670.1	0.0651085	0.222715	0.157606	AL589670.1
Adam17	0.0950251	0.252454	0.157429	Adam17
Dis3	0	0.157421	0.157421	Dis3
Mocos	0	0.157337	0.157337	Mocos
G2e3	0	0.157198	0.157198	G2e3
Ube2z	0.0686329	0.225672	0.157039	Ube2z
Gm20045	0	0.156993	0.156993	Gm20045
Nutf2	0.0411039	0.198076	0.156972	Nutf2
Cldn5	0	0.156916	0.156916	Cldn5
Srsf1	0.614928	0.771645	0.156717	Srsf1
Rarg	0.164701	0.321415	0.156714	Rarg
Nme2	0.0403105	0.196951	0.156641	Nme2
Senp3	0.183194	0.339824	0.156631	Senp3
Mllt6	0.2097	0.366224	0.156524	Mllt6
Tspan4	0.704402	0.860878	0.156476	Tspan4
Gtf2h5	0.727244	0.883547	0.156303	Gtf2h5
Exd2	0	0.156117	0.156117	Exd2
Ccdc51	0	0.155981	0.155981	Ccdc51
Mavs	0.0668323	0.22281	0.155978	Mavs
Snrnp35	0	0.155893	0.155893	Snrnp35
Sertm1	0	0.155871	0.155871	Sertm1
Upp2	0	0.155868	0.155868	Upp2
Lsm2	0.335488	0.491213	0.155724	Lsm2
Ccdc12	0.925969	1.0816	0.155634	Ccdc12
P2rx4	0.104585	0.260194	0.155608	P2rx4
Endog	0.160854	0.316435	0.155581	Endog
Esd	0.845747	1.00133	0.155578	Esd
Wrap53	0	0.15553	0.15553	Wrap53
Dennd6b	0	0.155345	0.155345	Dennd6b
Fam104a	0.732809	0.888125	0.155316	Fam104a
Cc2d1a	0	0.155286	0.155286	Cc2d1a
Nfrkb	0	0.155085	0.155085	Nfrkb
Hecw2	0	0.154958	0.154958	Hecw2
Kif13a	0	0.154842	0.154842	Kif13a
Sec23a	0.283001	0.437722	0.15472	Sec23a
Hs2st1	0.104291	0.258954	0.154663	Hs2st1
Csrp2	0.663935	0.818578	0.154643	Csrp2
Mylk	2.28292	2.43753	0.154614	Mylk
Dusp8	0.0567754	0.211351	0.154575	Dusp8
Cdk5rap2	0	0.154551	0.154551	Cdk5rap2
Cdk9	0.140757	0.29527	0.154513	Cdk9
Tubd1	0	0.15446	0.15446	Tubd1
Prrg2	0	0.154458	0.154458	Prrg2
Mvd	0.055716	0.210112	0.154396	Mvd
Golga5	0.0830684	0.237411	0.154342	Golga5
Rfc5	0	0.15431	0.15431	Rfc5
Dctn5	0.0668323	0.221127	0.154295	Dctn5
Fam13a	0.0956541	0.249941	0.154286	Fam13a
Slc18b1	0	0.154197	0.154197	Slc18b1
Nt5m	0.0946352	0.248793	0.154157	Nt5m
Zfyve21	0.352538	0.506647	0.154109	Zfyve21
Chmp5	0.948451	1.10256	0.154109	Chmp5
Tmem136	0.106319	0.260367	0.154048	Tmem136
Supt16	0.382268	0.536315	0.154047	Supt16
Dgkg	0.317033	0.470976	0.153943	Dgkg
Zmym1	0.104291	0.258209	0.153918	Zmym1
Ric8a	0.332379	0.486294	0.153916	Ric8a
Rbm39	1.82549	1.97937	0.153889	Rbm39
Ago4	0	0.153872	0.153872	Ago4
Atp5o.1	1.36371	1.51756	0.153847	Atp5o.1
Npdc1	0.567483	0.721233	0.153749	Npdc1
Msantd2	0	0.153746	0.153746	Msantd2
Rpl7	2.30149	2.45523	0.153739	Rpl7
Prkag2	0.192986	0.346656	0.15367	Prkag2
Edc4	0	0.153488	0.153488	Edc4
Trappc6a	0.354431	0.507848	0.153418	Trappc6a
Ndrg3	0.321188	0.474535	0.153347	Ndrg3
Fbxo2	0.12838	0.281705	0.153325	Fbxo2
Gtf3c3	0.0657405	0.21906	0.153319	Gtf3c3
Tpst2	0.335642	0.488925	0.153284	Tpst2
Slc17a9	0.159166	0.312426	0.15326	Slc17a9
Ppp1r37	0.321634	0.474865	0.153232	Ppp1r37
Dus3l	0.228211	0.381392	0.153181	Dus3l
Ywhaq	1.76463	1.9178	0.153166	Ywhaq
Mtif2	0.493387	0.646484	0.153097	Mtif2
Bsdc1	0.294604	0.44769	0.153086	Bsdc1
Rtkn2	0	0.15299	0.15299	Rtkn2
Klhl32	0	0.152969	0.152969	Klhl32
Txlng	0.132905	0.285831	0.152927	Txlng
Ywhah	0.820896	0.973742	0.152845	Ywhah
Trmt1l	0.431726	0.584542	0.152816	Trmt1l
Ndfip2	0.66565	0.81838	0.15273	Ndfip2
Ndufb8	1.46949	1.62212	0.152634	Ndufb8
Fis1	1.24715	1.3997	0.152553	Fis1
Vps8	0	0.15254	0.15254	Vps8
Afap1l2	0.580715	0.733223	0.152508	Afap1l2
mt-Atp6	4.64464	4.79704	0.152403	mt-Atp6
Nrm	0.0403105	0.192691	0.152381	Nrm
Mtmr12	0.0657405	0.21808	0.15234	Mtmr12
Lemd2	0	0.152337	0.152337	Lemd2
Ptk2	1.1885	1.34073	0.152235	Ptk2
Phldb1	0.179846	0.332066	0.15222	Phldb1
Stxbp3	0.156776	0.308804	0.152028	Stxbp3
Nptn	0.86684	1.01873	0.151892	Nptn
Taf2	0.0830684	0.234839	0.151771	Taf2
Ppp2r1b	0.0403105	0.192061	0.151751	Ppp2r1b
Usp32	0.0915317	0.243226	0.151694	Usp32
Pigc	0.0830684	0.234657	0.151588	Pigc
Nmnat1	0	0.151586	0.151586	Nmnat1
Zhx2	0	0.151473	0.151473	Zhx2
Clic1	0.985129	1.13655	0.151424	Clic1
Rpap1	0	0.151415	0.151415	Rpap1
Sf3a3	0.216235	0.367523	0.151288	Sf3a3
Ubald2	0.927166	1.07819	0.151022	Ubald2
Camsap1	0	0.151009	0.151009	Camsap1
Socs3	0	0.150983	0.150983	Socs3
Dcaf8	0.706645	0.857576	0.150931	Dcaf8
Trappc2l	0.75052	0.90135	0.15083	Trappc2l
Ispd	0	0.150755	0.150755	Ispd
Ifitm2	2.22126	2.37196	0.150693	Ifitm2
Urm1	0.296069	0.446632	0.150563	Urm1
Scn2b	0.209779	0.360289	0.15051	Scn2b
Dync1li1	0.131372	0.281879	0.150508	Dync1li1
Irf3	0.354268	0.504694	0.150427	Irf3
Kansl1	0.256814	0.40717	0.150356	Kansl1
Mbnl1	0.483225	0.633536	0.15031	Mbnl1
Samm50	0.679632	0.829916	0.150283	Samm50
Lgmn	0.727211	0.877491	0.15028	Lgmn
Ino80	0.0657405	0.215946	0.150205	Ino80
Uck2	0.0554048	0.205568	0.150163	Uck2
[truncated: 11,039 more rows]

## Sheet: Neuron
gene_id	Control	Treated	diff	gene
Sort1	0.355489	1.35633	1.00084	Sort1
Scn1b	1.09955	2.09331	0.993766	Scn1b
Pianp	0.464906	1.45329	0.988385	Pianp
Gm26917	0.406409	1.34501	0.938599	Gm26917
Clstn1	2.02836	2.95904	0.930684	Clstn1
Dusp3	0.239468	1.13349	0.894022	Dusp3
Atp1a1	1.49184	2.38461	0.892768	Atp1a1
Ly6e	0.239596	1.10911	0.869515	Ly6e
Slc32a1	0.141952	1.00646	0.864512	Slc32a1
Slc9a6	0.112297	0.976071	0.863774	Slc9a6
Nrgn	1.47529	2.32784	0.852552	Nrgn
Sgta	0.171471	1.01812	0.84665	Sgta
Fam234b	0.354796	1.19997	0.845177	Fam234b
Gpr88	0.273264	1.10314	0.829878	Gpr88
Slc25a22	0.239689	1.06856	0.828875	Slc25a22
Actb	2.01001	2.83778	0.827773	Actb
Egfl7	0.101646	0.910316	0.80867	Egfl7
Mt2	0.529611	1.32315	0.793541	Mt2
Fndc5	0.079694	0.870667	0.790973	Fndc5
Eef1a2	0.722752	1.51229	0.789541	Eef1a2
Eif1b	0.466646	1.2504	0.783756	Eif1b
Celf1	0.558612	1.33927	0.780662	Celf1
Srsf3	0.328609	1.10356	0.77495	Srsf3
Frrs1l	1.1817	1.95128	0.769572	Frrs1l
Cck	1.72785	2.48499	0.757146	Cck
Brinp1	0.680043	1.43622	0.756176	Brinp1
Them6	0.105899	0.861438	0.755539	Them6
Ptprn	1.14455	1.89776	0.753204	Ptprn
Polr2j	0.0348367	0.785737	0.7509	Polr2j
Tmem178	0.146228	0.895845	0.749617	Tmem178
Gad1	0.322581	1.07147	0.748887	Gad1
Gfra2	0	0.747874	0.747874	Gfra2
Slc39a7	0.254474	0.99404	0.739565	Slc39a7
Sez6	0.502531	1.24066	0.738125	Sez6
Ngef	0.55931	1.2923	0.73299	Ngef
Penk	1.09501	1.82591	0.730903	Penk
Cdk5r2	0.465538	1.19393	0.728397	Cdk5r2
Rtn4r	0.408505	1.12395	0.715441	Rtn4r
Gde1	1.08657	1.80024	0.713675	Gde1
Gramd1b	0.11479	0.827485	0.712695	Gramd1b
Sox4	0.391321	1.10203	0.710707	Sox4
Acp2	0.0995724	0.806417	0.706845	Acp2
Nhp2	0.141833	0.848584	0.706752	Nhp2
Fam81a	0.35974	1.06539	0.705651	Fam81a
Diras2	0.271523	0.976185	0.704661	Diras2
Stk32c	0.445182	1.1494	0.704218	Stk32c
Nptxr	1.51366	2.21126	0.697601	Nptxr
Enpp2	0.306931	1.00286	0.695925	Enpp2
Hmgb3	0.15328	0.846453	0.693173	Hmgb3
Mrps33	0.637758	1.32408	0.686323	Mrps33
Spns1	0.0851395	0.769381	0.684242	Spns1
Kcnf1	0.299042	0.980297	0.681255	Kcnf1
Sema7a	0.242386	0.922399	0.680013	Sema7a
Ttyh3	0.213632	0.886085	0.672453	Ttyh3
Pip4k2c	0.26251	0.934338	0.671828	Pip4k2c
Hsd17b12	0.26788	0.937054	0.669174	Hsd17b12
Neurod6	0.156312	0.824683	0.668372	Neurod6
Grm3	0.120353	0.787219	0.666866	Grm3
Ski	0.161099	0.826149	0.66505	Ski
Tmed9	0.723074	1.38724	0.664167	Tmed9
Cyb5a	0.330735	0.99146	0.660724	Cyb5a
Slc17a7	1.57983	2.23956	0.659727	Slc17a7
Gm17750	0	0.658123	0.658123	Gm17750
Acvr1b	0.505577	1.16278	0.657201	Acvr1b
Gabra1	1.39055	2.04708	0.656534	Gabra1
Igsf9b	0.477212	1.13199	0.654779	Igsf9b
Hlf	0.329745	0.981257	0.651512	Hlf
Gabrg2	1.01796	1.66808	0.650126	Gabrg2
Hapln4	0.130641	0.780087	0.649446	Hapln4
Rfc2	0.016455	0.664182	0.647727	Rfc2
Homer1	0.467264	1.11327	0.646009	Homer1
Camk2g	0.743566	1.38799	0.644421	Camk2g
Kcna2	0.722132	1.3653	0.643164	Kcna2
Rac1	0.534505	1.17423	0.639726	Rac1
Ptprj	0.462691	1.10193	0.639237	Ptprj
Mrps24	0.134638	0.773558	0.63892	Mrps24
Sdhc	0.100879	0.73924	0.638362	Sdhc
Gpat4	0.0281733	0.666279	0.638106	Gpat4
Gabra3	0.343987	0.978811	0.634824	Gabra3
Cx3cl1	1.55282	2.18473	0.631908	Cx3cl1
Gm14703	0.132699	0.764535	0.631836	Gm14703
Crat	0.0348367	0.664147	0.629311	Crat
Faim2	1.46476	2.09356	0.628804	Faim2
Ptk2b	0.464809	1.09079	0.625981	Ptk2b
Otub1	0.433605	1.05897	0.625366	Otub1
Hmgb2	0.1072	0.731704	0.624505	Hmgb2
Astn1	0.750328	1.37292	0.622594	Astn1
Prrt1	0.197342	0.819413	0.622071	Prrt1
Tubb2b	0.784595	1.40638	0.621781	Tubb2b
Scamp5	0.669166	1.2877	0.618532	Scamp5
Slc3a2	0.460751	1.07719	0.616436	Slc3a2
Atrn	0.619519	1.23546	0.615944	Atrn
Pde1b	0.0592773	0.67235	0.613073	Pde1b
Sphkap	0.196732	0.809565	0.612834	Sphkap
Htatsf1	0.0186838	0.628259	0.609575	Htatsf1
Atp5k	1.14021	1.7494	0.609187	Atp5k
Rnf145	0.418038	1.02602	0.60798	Rnf145
Rbfox3	0.825526	1.43321	0.607689	Rbfox3
Prkcb	0.92957	1.52989	0.600324	Prkcb
Ube2e1	0.257882	0.857848	0.599966	Ube2e1
Psap	2.77233	3.36804	0.595715	Psap
Syngr1	0.954147	1.54754	0.593393	Syngr1
Golga7b	0.254363	0.846533	0.59217	Golga7b
Gapdh	2.01712	2.60915	0.59203	Gapdh
Atp1b1	3.03872	3.62915	0.590432	Atp1b1
Mfsd4a	0.23882	0.829014	0.590194	Mfsd4a
Paf1	0.0235515	0.613038	0.589486	Paf1
Ndufaf4	0.337604	0.926786	0.589181	Ndufaf4
Wasf3	0.201951	0.790644	0.588693	Wasf3
Cnih1	0.195473	0.783565	0.588091	Cnih1
Ssr2	0.408854	0.996707	0.587853	Ssr2
AI593442	0.961964	1.54968	0.587713	AI593442
Meis3	0.177716	0.764276	0.58656	Meis3
Arl2	0.26929	0.853951	0.584662	Arl2
Ppm1b	0.180434	0.763886	0.583452	Ppm1b
Psat1	0.148101	0.73142	0.583319	Psat1
Tom1l2	0.0259656	0.60901	0.583045	Tom1l2
Degs1	0.333204	0.914949	0.581745	Degs1
Aplp1	2.16264	2.7437	0.581054	Aplp1
Dcbld2	0	0.580396	0.580396	Dcbld2
Sgsm2	0.1699	0.749276	0.579376	Sgsm2
Sdf2	0.461949	1.03905	0.577099	Sdf2
Nptx1	1.07893	1.65552	0.576586	Nptx1
Lingo1	1.15786	1.73389	0.576031	Lingo1
Enho	0	0.575616	0.575616	Enho
Cpt1c	0.352543	0.927801	0.575258	Cpt1c
Ccnd2	0.715189	1.28934	0.574151	Ccnd2
Camk4	0.619898	1.19384	0.573945	Camk4
Nt5c2	0.0776654	0.651589	0.573923	Nt5c2
Nsg2	1.17622	1.7488	0.572581	Nsg2
Wipf3	0.202944	0.775459	0.572515	Wipf3
Egr3	0.149569	0.7213	0.571731	Egr3
Atp1b2	0.666104	1.23749	0.571385	Atp1b2
Ccdc85b	0.226802	0.794752	0.56795	Ccdc85b
Ckb	2.07819	2.64466	0.566471	Ckb
Vwa5b2	0.102125	0.666764	0.564639	Vwa5b2
Mrpl45	0.258983	0.822953	0.56397	Mrpl45
Mtcl1	0.154715	0.714905	0.56019	Mtcl1
Nptn	1.73285	2.29232	0.559469	Nptn
Tspan17	0.0724936	0.631755	0.559261	Tspan17
Emc3	0.370098	0.928766	0.558668	Emc3
Asb13	0.0671351	0.625431	0.558296	Asb13
Homer2	0.19091	0.747543	0.556633	Homer2
Pitpnm3	0.00966763	0.565546	0.555878	Pitpnm3
Cxxc5	0.15235	0.708174	0.555824	Cxxc5
Ccdc32	0.144006	0.698895	0.554889	Ccdc32
Rpl7a	0.627623	1.18246	0.554835	Rpl7a
Scg5	1.75534	2.30914	0.553797	Scg5
Sorl1	0.833547	1.38598	0.55243	Sorl1
Cdh6	0.215743	0.767399	0.551656	Cdh6
Grin1	1.43505	1.98458	0.549537	Grin1
Rin1	0.00966763	0.558654	0.548987	Rin1
H2afv	0.211044	0.758949	0.547905	H2afv
Cds1	0.00966763	0.556718	0.547051	Cds1
Rab24	0.34537	0.892257	0.546887	Rab24
[truncated: 12,883 more rows]

## Sheet: Oligodendrocyte
gene_id	Control	Treated	diff	gene
[truncated: 13,038 more rows]
